# Supplementary material for: Anti-Restriction Gene Homologs Are Highly Represented in Methicillin-Resistant and Multidrug-Resistant Staphylococcus aureus ST239 and ST398: Implications for Resistance Gene Acquisitions
Source: MDPI journal article supplement (doi:10.3390/antibiotics11091217), 2022-09-08
Supplement: s1 [file s1]

**Supplementary Table S2.** Primers used in this study.

| Primer              | Sequence                            | AT*  | Reference  |
|---------------------|-------------------------------------|------|------------|
| <i>ardA</i> compFwd | GCATCAGAATTCAAAGGATGTGATAAGAATTGGAA | 55°C | [1]        |
| <i>ardA</i> compRev | GCATCAGGATCCTAATTTATACCTCTCCGTGCTA  | 55°C | [1]        |
| RT <i>ardA</i> fwd  | CGTCTATGTGAAGCCATTCAA               | 55°C | This study |
| RT <i>ardA</i> rev  | TTCCAGTAATTCTTCCAAGCTA              | 55°C | This study |
| <i>cat</i> fwd      | GCGTGAGCTATTAAGC                    | 55°C | This study |
| <i>cat</i> rev      | GCACCCATTAGTTCAAC                   | 55°C | This study |

\*AT: annealing temperature.
