# Supplementary material for: Anti-Restriction Gene Homologs Are Highly Represented in Methicillin-Resistant and Multidrug-Resistant Staphylococcus aureus ST239 and ST398: Implications for Resistance Gene Acquisitions
Source: MDPI journal article supplement (doi:10.3390/antibiotics11091217), 2022-09-08
Supplement: s1 [file s1]

**Supplementary Table S1.** Important residues described previously by Nekbyrasov *et al.* [19] and Mc Mahon *et al.* [6] for ArdA-H2 and their correspondents on ArdA-H1.

| ArdA1  | ArdA2                | Motif            | Domain     |
|--------|----------------------|------------------|------------|
| Phe92  | Phe91                |                  | Central    |
| Gln127 | Ala126               | anti-restriction | C-terminal |
| Leu128 | Leu127 <sup>+</sup>  |                  |            |
| Gly129 | Gly128               |                  |            |
| Glu130 | Glu129               |                  |            |
| Val131 | Val130               |                  |            |
| Pro132 | Pro131               |                  |            |
| Ser133 | Ala132               |                  |            |
| Asn134 | Ser133               |                  |            |
| Leu135 | Leu134 <sup>+</sup>  |                  |            |
| Gln136 | Gln135               |                  |            |
| Asn137 | Asn136               |                  |            |
| Tyr138 | Tyr137* <sup>+</sup> |                  |            |
| Ile139 | Ile138* <sup>+</sup> |                  |            |
| Asp140 | Asp139 <sup>+</sup>  |                  |            |
| Tyr141 | Tyr140               |                  |            |
| Asp140 | Asp139 <sup>+</sup>  |                  |            |
| Val161 | Ile160               | VF-motif         |            |
| Phe162 | Phe161               |                  |            |
| Tyr164 | Ile163               |                  |            |

\*Essential residues.

<sup>+</sup> Residues located at the dimer interface.
