# Supplementary material for: Anti-Restriction Gene Homologs Are Highly Represented in Methicillin-Resistant and Multidrug-Resistant Staphylococcus aureus ST239 and ST398: Implications for Resistance Gene Acquisitions
Source: Antibiotics (Basel). 2022 Sep 8;11(9):1217. doi: 10.3390/antibiotics11091217 (PMC9495042; doi:10.3390/antibiotics11091217)
Supplement: Supplementary file 1 [file antibiotics-11-01217-s001.zip]

Archive with 6 entries (6 files):
- Supplementary file S1.xlsx
- Supplementary file S2.xlsx
- Supplementary file S3.xlsx
- Supplementary file S4.xlsx
- Supplementary Table S1.pdf
- Supplementary Table S2.pdf
