# Supplementary material for: Anti-Restriction Gene Homologs Are Highly Represented in Methicillin-Resistant and Multidrug-Resistant Staphylococcus aureus ST239 and ST398: Implications for Resistance Gene Acquisitions
Source: Antibiotics (Basel). 2022 Sep 8;11(9):1217. doi: 10.3390/antibiotics11091217 (PMC9495042; doi:10.3390/antibiotics11091217)
Supplement: Supplementary file 1 [file antibiotics-11-01217-s001.zip › Supplementary file S1.xlsx]

## Sheet: Tab1
	Supplementary File S1. GenBank access number of the genome sequences of some selected Gram-positives bacteria carrying ardA-H1 (Tab 1) and ardA-H2 (Tab 2) used to construct the respective phylogenetic trees.
	Strain	Genome sequence Acc:
	Staphylococcus aureus Mu50	BA000017
	Staphylococcus aureus JKD6009	LR027876
	E. faecium ISMMS_VRE_11	CP016163
	Streptococcus agalactiae NGBS128	CP012480
	Jeotgalibaca sp PTS2502	CP012480
	Lysteria monocytogenes L2624	CP007686
	Staphylococcus aureus BMB9393	CP005288

## Sheet: Tab2
	Supplementary file S1: GenBank access number of the genome sequences from some selected Gram-positive bacteria carrying ardA-H1 (Tab 1) and ardA-H2 (Tab 2) used for construction of phylogenetic trees.
	Strain	Genome sequence Acc:
	Streptococcus pneumoniae 2245STDY6178787	LR216060
	Streptococcus agalactiae B508	CP021770
	Clostridioides difficile strain R1	CP026613
	Streptococcus pseudoporcinus strain NCTC13786	LR134341
	Streptococcus equinus strain NCTC11436	LR134203
	Streptococcus suis strain 1081	CP017667
	Streptococcus pasteurianus strain NCTC13784	LS483462
	Staphylococcus aureus strain PTDrAP2	CP029172
	Enterococcus faecalis strain CVM N48037F	CP028720
	Enterococcus faecium isolate E9101	LR135474
									T
