# Supplementary material for: Anti-Restriction Gene Homologs Are Highly Represented in Methicillin-Resistant and Multidrug-Resistant Staphylococcus aureus ST239 and ST398: Implications for Resistance Gene Acquisitions
Source: Antibiotics (Basel). 2022 Sep 8;11(9):1217. doi: 10.3390/antibiotics11091217 (PMC9495042; doi:10.3390/antibiotics11091217)
Supplement: Supplementary file 1 [file antibiotics-11-01217-s001.zip › Supplementary file S2.xlsx]

## Sheet: LA-ardA positives
Supplementary File S2. Assessment of resistance-associated genes acquired by horizontal transfer in the genomes carrying ardA-H1, ardA-H2, and in those lacking these genes using ResFinder 3.0.	Strain	beta-lactam	aminoglycoside	colistin	fosfomycin	fusidicacid	glycopeptide	macrolide	nitroimidazole	oxazolidinone	phenicol	quinolone	rifampicin	sulphonamide	tetracycline	trimethoprim	ardA-H2	ardA-H1	Tn916	Tn5801	Resistance without bl
GCA_000577355.1	S2396	99.291	0	0	0	0	0	0	0	0	0	0	0	0	99.792	0	100	0	99.978	0	1
GCA_000582745.1	S2395	99.291	0	0	0	0	0	0	0	0	0	0	0	0	99.792	0	100	0	99.978	0	1
GCA_003193745.1	AR_0470	95.863	100	0	0	0	0	100	0	0	0	0	0	0	95.313	0	100	0	97.943	0	3
GCA_003827915.1	FDAARGOS_504	98.463	99.78	0	0	0	0	99.727	0	0	0	0	0	0	99.583	0	100	0	99.882	0	3
GCA_000361085.1	M0408	95.863	100	0	0	0	0	99.863	0	0	0	0	0	0	95.313	0	100	0	97.97	0	3
GCA_000307695.1	M2	98.229	99.78	0	0	0	0	99.863	0	0	0	0	0	0	99.583	0	100	0	99.882	0	3
GCA_002260445.1	UV1167	98.463	99.78	0	0	0	0	99.863	0	0	0	0	0	0	99.583	0	100	0	0	0	3
GCA_002887445.1	UV1166	98.463	99.78	0	0	0	0	99.863	0	0	0	0	0	0	99.583	0	100	0	0	0	3
GCA_900018315.1	st1460	98.463	100	0	0	0	0	100	0	0	0	0	0	0	99.792	0	100	0	99.983	0	3
GCA_900045585.1	st140	98.463	100	0	0	0	0	100	0	0	0	0	0	0	99.375	0	100	0	99.828	0	3
GCA_900053475.1	st1777	98.463	100	0	0	0	0	100	0	0	0	0	0	0	99.792	0	100	0	99.983	0	3
GCA_900058635.1	st2975	98.463	100	0	0	0	0	100	0	0	0	0	0	0	99.792	0	100	0	99.983	0	3
GCA_900063345.1	st2910	98.463	100	0	0	0	0	100	0	0	0	0	0	0	99.792	0	100	0	99.983	0	3
GCA_000536555.1	UCIM6146	99.882	99.874	0	0	0	0	98.978	0	0	0	0	0	0	99.792	0	100	0	99.983	0	3
GCA_002122285.1	CFSA349	99.882	99.874	0	0	0	0	98.978	0	0	0	0	0	0	0	0	100	0	0	0	2
GCA_003240325.1	CM17	98.463	99.78	0	0	0	0	100	0	0	0	0	0	0	97.708	0	100	100	0	99.989	3
GCA_000242475.2	21252	0	99.78	0	0	0	0	98.912	0	0	100	0	0	0	100	0	100	0	99.922	93.369	4
GCA_900035595.1	st2803	95.745	0	0	0	100	0	0	0	0	0	0	0	0	99.792	0	100	0	99.961	0	2
GCA_900035935.1	st755	95.745	0	0	0	0	0	0	0	0	0	0	0	0	99.792	0	100	0	99.972	0	1
GCA_000586695.1	DAR5852	97.991	100	0	0	0	0	0	0	0	0	0	0	0	95.26	0	100	0	97.95	0	2
GCA_000607645.1	DAR3584	97.991	99.869	0	0	0	0	100	0	0	0	0	0	0	99.792	0	90.121	0	96.376	0	3
GCA_000608085.1	DAR3761	99.9	99.869	0	0	0	0	100	0	0	0	0	0	0	99.792	0	90.121	0	96.376	0	3
GCA_000409145.1	H29	97.991	99.869	0	0	0	0	100	0	0	0	0	0	0	99.372	0	100	0	0	0	3
GCA_000596065.1	DAR5846	97.991	100	0	0	0	0	0	0	0	0	0	0	0	95.313	0	100	0	97.957	0	2
GCA_003238455.1	CM67	99.95	99.738	0	0	0	0	100	0	100	100	0	0	0	99.792	0	100	0	99.978	0	5
GCA_900484175.1	EOE259	97.991	99.869	0	0	0	0	98.973	0	0	0	0	0	0	99.792	0	90.121	0	96.376	0	3
GCA_000731175.1	MM61	97.991	99.869	0	0	0	0	100	0	0	0	0	0	0	99.375	0	100	0	99.8	0	3
GCA_000009585.1	type strain:ST398	95.981	99.647	0	0	0	0	0	0	0	0	0	0	0	99.792	0	100	0	99.972	0	2
GCA_000296595.1	08BA02176	95.863	0	0	0	0	0	99.619	0	0	0	0	0	0	99.792	0	100	0	99.956	0	2
GCA_001465635.1	RIVM1295	95.981	0	0	0	0	0	99.048	0	0	0	0	0	0	99.792	0	99.799	0	99.972	0	2
GCA_001465675.1	RIVM1607	95.981	0	0	0	0	0	99.873	0	0	0	0	0	0	99.792	0	100	0	99.972	0	2
GCA_001465755.1	RIVM3897	98.463	100	0	0	0	0	99.727	0	0	0	0	0	0	99.792	0	100	0	99.972	0	3
GCA_001887075.1	LA-MRSA ST398	98.463	100	0	0	0	0	100	0	0	0	0	0	0	99.792	0	100	0	99.972	0	3
GCA_002025125.1	08S00974	95.981	0	0	0	0	0	99.873	0	0	0	0	0	0	99.792	0	100	0	99.972	0	2
GCA_002204575.1	ISU926	98.463	100	0	0	0	0	100	0	0	0	0	0	0	99.792	0	100	0	99.972	0	3
GCA_003029645.1	CFSAN064038	98.463	94.238	0	0	0	0	99.797	0	100	100	0	0	0	99.792	100	100	0	99.972	0	6
GCA_003111745.1	PTDrAP2	95.863	100	0	0	0	0	100	0	99.905	98.88	0	0	0	99.792	100	100	0	100	0	6
GCA_004026165.1	PCFH-226	95.981	100	0	0	0	0	99.863	0	0	0	0	0	0	99.792	0	100	0	99.978	0	3
GCA_004026185.1	PCFA-221	95.981	100	0	0	0	0	99.863	0	0	0	0	0	0	99.792	0	100	0	99.978	0	3
GCA_900155335.1	NZ15MR0322	95.863	0	0	0	0	0	0	0	0	0	0	0	0	99.792	0	100	0	99.972	0	1
GCA_900324205.1	1_1439	95.981	0	0	0	0	0	0	0	0	0	0	0	0	99.792	0	100	0	99.972	0	1
GCA_900324215.1	3_LA_115	98.463	100	0	0	0	0	100	0	0	0	0	0	0	99.792	100	100	0	99.983	0	4
GCA_900324225.1	7_4623	98.463	100	0	0	0	0	100	0	0	0	0	0	0	99.792	100	100	0	99.983	0	4
GCA_900324235.1	5_3949	97.991	0	0	0	0	0	0	0	0	0	0	0	0	99.792	100	100	0	99.978	0	2
GCA_900324245.1	8_LA_272	98.463	100	0	0	0	0	100	0	0	0	0	0	0	99.792	100	100	0	99.983	0	4
GCA_900324255.1	2_LA_86	98.463	100	0	0	0	0	100	0	0	0	0	0	0	99.792	100	100	0	99.983	0	4
GCA_900324265.1	9_LA_281	98.463	100	0	0	0	0	100	0	0	0	0	0	0	99.792	100	100	0	99.983	0	4
GCA_900324275.1	6_LA_232	95.863	100	0	0	0	0	99.726	0	0	0	0	0	0	99.74	0	100	0	99.967	0	3
GCA_900324285.1	4_LA_208	95.981	0	0	0	0	0	0	0	0	0	0	0	0	99.792	0	100	0	99.972	0	1
GCA_900324295.1	16_LA_309	95.981	100	0	0	0	0	0	0	0	0	0	0	0	99.792	0	99.799	0	99.961	0	2
GCA_900324305.1	13_LA_301	98.345	100	0	0	0	0	99.863	0	0	0	0	0	0	99.792	100	100	0	99.983	0	4
GCA_900324315.1	12_LA_293	95.981	0	0	0	0	0	0	0	0	0	0	0	0	99.792	0	100	0	99.961	0	1
GCA_900324325.1	14_5418	98.345	100	0	0	0	0	99.863	0	0	0	0	0	0	99.792	100	100	0	99.972	0	4
GCA_900324335.1	15_LA_305	99.9	0	0	0	0	0	99.873	0	0	0	0	0	0	99.792	0	100	0	99.972	0	2
GCA_900324345.1	17_LA_343	95.981	100	0	0	0	0	0	0	0	0	0	0	0	99.792	97.358	100	0	99.972	0	3
GCA_900324355.1	10_5235	95.981	0	0	0	0	0	0	0	0	0	0	0	0	99.792	0	100	0	99.967	0	1
GCA_900324365.1	19_LA_388	98.463	100	0	0	0	0	100	0	0	0	0	0	0	99.792	100	100	0	99.983	0	4
GCA_900324385.1	20_LA_415	98.463	100	0	0	0	0	100	0	0	0	0	0	0	99.792	100	100	0	99.983	0	4
GCA_900324405.1	21_LA_436	98.463	100	0	0	0	0	100	0	0	0	0	0	0	99.792	100	100	0	99.978	0	4
GCA_900324415.1	22_LA_562	95.981	100	0	0	0	0	0	0	0	0	0	0	0	99.792	97.358	100	0	99.961	0	3
GCA_000636175.1	08-01084	97.991	99.647	0	0	0	0	0	0	0	0	0	0	0	99.792	0	100	0	99.983	0	2
GCA_000636195.1	08-01085	97.991	0	0	0	0	0	99.873	0	0	0	0	0	0	99.792	0	100	0	99.983	0	2
GCA_000636215.1	08-01728	97.991	0	0	0	0	0	99.873	0	0	0	0	0	0	99.792	0	100	0	99.983	0	2
GCA_000636255.1	08134-6	99.9	0	0	0	0	0	0	0	0	0	0	0	0	99.792	97.358	100	0	99.972	0	2
GCA_000636275.1	08139-6	95.981	0	0	0	0	0	0	0	0	100	0	0	0	99.792	100	100	0	99.972	0	3
GCA_000636295.1	08142-8	95.981	100	0	0	0	0	0	0	0	0	0	0	0	99.792	97.358	100	0	99.967	0	3
GCA_000636315.1	08143-5	95.981	100	0	0	0	0	0	0	0	0	0	0	0	99.792	97.358	100	0	99.967	0	3
GCA_000636335.1	09S00475	97.991	0	0	0	0	0	99.81	0	0	0	0	0	0	99.74	0	100	0	99.978	0	2
GCA_000636355.1	10S01493	97.991	0	0	0	0	0	99.81	0	0	0	0	0	0	99.792	0	100	0	99.978	0	2
GCA_000636375.1	110802495	97.991	0	0	0	0	0	99.81	0	0	0	0	0	0	99.792	0	100	0	99.983	0	2
GCA_000636395.1	1110601704	97.872	0	0	0	0	0	99.873	0	0	0	0	0	0	99.792	0	100	0	99.983	0	2
GCA_000636415.1	1110601896	97.991	0	0	0	0	0	99.81	0	0	0	0	0	0	99.792	0	100	0	99.978	0	2
GCA_000636435.1	1110700562	97.991	0	0	0	0	0	99.81	0	0	0	0	0	0	99.792	0	100	0	99.983	0	2
GCA_000636455.1	1110700610	95.981	0	0	0	0	0	0	0	0	0	0	0	0	99.792	0	100	0	99.978	0	1
GCA_000636475.1	1110701127	97.991	0	0	0	0	0	0	0	0	99.86	0	0	0	99.792	0	100	0	99.983	0	2
GCA_000636495.1	1110802883	97.991	100	0	0	0	0	99.873	0	0	0	0	0	0	99.792	0	100	0	99.983	0	3
GCA_000636535.1	1110807699	97.991	0	0	0	0	0	99.81	0	0	0	0	0	0	99.792	0	100	0	99.983	0	2
GCA_000636555.1	1110904178	97.991	0	0	0	0	0	0	0	0	0	0	0	0	99.792	0	100	0	99.983	0	1
GCA_000636635.1	1111101949	97.991	0	0	0	0	0	99.746	0	0	0	0	0	0	99.792	0	100	0	99.983	0	2
GCA_000636655.1	1111102620	97.991	0	0	0	0	0	99.81	0	0	0	0	0	0	99.792	0	100	0	99.978	0	2
GCA_000636675.1	1111200013	97.991	99.647	0	0	0	0	0	0	0	0	0	0	0	99.792	0	100	0	99.978	0	2
GCA_000636695.1	1111203374	97.991	0	0	0	0	0	99.81	0	0	0	0	0	0	99.792	0	100	0	99.983	0	2
GCA_000636715.1	1111205429	97.991	0	0	0	0	0	99.873	0	0	0	0	0	0	99.792	0	100	0	99.983	0	2
GCA_000636735.1	1111206270	97.991	0	0	0	0	0	95.455	0	0	99.86	0	0	0	99.792	0	100	0	99.983	0	3
GCA_000636755.1	11P4	95.981	99.647	0	0	0	0	0	0	0	0	0	0	0	99.792	0	100	0	99.978	0	2
GCA_000636775.1	11P8	95.981	0	0	0	0	0	0	0	0	0	0	0	0	99.792	0	100	0	99.978	0	1
GCA_000636815.1	11S00627	97.991	0	0	0	0	0	0	0	0	0	0	0	0	99.792	0	100	0	99.983	0	1
GCA_000636855.1	11S01586	97.991	0	0	0	0	0	0	0	0	0	0	0	0	99.792	0	100	0	99.983	0	1
GCA_000636915.1	12464	97.991	0	0	0	0	0	99.873	0	0	0	0	0	0	99.792	0	100	0	99.983	0	2
GCA_000636955.1	12S00579	97.991	0	0	0	0	0	99.873	0	0	0	0	0	0	99.792	0	100	0	99.983	0	2
GCA_000636975.1	12S00881	97.991	0	0	0	0	0	99.048	0	0	0	0	0	0	99.792	0	100	0	99.978	0	2
GCA_000636995.1	12S01153	99.9	0	0	0	0	0	99.81	0	0	0	0	0	0	99.792	0	100	0	99.983	0	2
GCA_000637015.1	12S01399	97.991	0	0	0	0	0	0	0	0	0	0	0	0	99.792	0	100	0	99.983	0	1
GCA_000637055.1	12-ST01988	99.9	0	0	0	0	0	99.81	0	0	0	0	0	0	99.792	0	100	0	99.983	0	2
GCA_000637095.1	14(11MN_17-08-66-05)	95.981	100	0	0	0	0	0	0	0	0	0	0	0	99.792	100	100	0	99.972	0	3
GCA_000637115.1	150211/pool 1	97.991	0	0	0	0	0	95.238	0	0	0	0	0	0	99.792	0	100	0	99.978	0	2
GCA_000637135.1	16(11S1S4-09)	95.981	0	0	0	0	0	99.048	0	0	0	0	0	0	99.792	100	100	0	99.983	0	3
GCA_000637155.1	18439-17	97.991	100	0	0	0	0	95.455	0	0	99.86	0	0	0	99.792	0	100	0	99.978	0	4
GCA_000637175.1	18439-62	97.991	0	0	0	0	0	0	0	0	99.86	0	0	0	99.792	0	100	0	99.972	0	2
GCA_000637235.1	2(04HN_17-03-52-05)	95.981	0	0	0	0	0	0	0	0	0	0	0	0	99.792	100	100	0	99.967	0	2
GCA_000637255.1	2009-60-561-1	95.981	100	0	0	0	0	99.727	0	0	0	0	0	0	99.792	100	100	0	99.967	0	4
GCA_000637275.1	2010-60-1240-1	98.463	100	0	0	0	0	100	0	0	0	0	0	0	99.792	100	100	0	99.978	0	4
GCA_000637295.1	2010-60-6063-29	97.991	0	0	0	0	0	99.81	0	0	0	0	0	0	99.792	0	100	0	99.983	0	2
GCA_000637315.1	2010-60-6063-39	95.981	0	0	0	0	0	0	0	0	0	0	0	0	99.792	0	100	0	99.972	0	1
GCA_000637335.1	2010-60-6511-10	95.981	100	0	0	0	0	0	0	0	0	0	0	0	99.792	97.358	100	0	99.972	0	3
GCA_000637355.1	2010-60-6511-39	98.463	100	0	0	0	0	100	0	0	0	0	0	0	99.792	100	100	0	99.967	0	4
GCA_000637375.1	2010-60-6511-5	95.981	99.869	0	0	0	0	99.048	0	0	0	0	0	0	99.792	97.358	100	0	99.972	0	4
GCA_000637395.1	2010-60-7626-19	97.991	0	0	0	0	0	99.81	0	0	0	0	0	0	99.792	0	100	0	99.983	0	2
GCA_000637415.1	2011-60-1490-31	95.981	99.869	0	0	0	0	99.728	0	0	0	0	0	0	99.792	100	100	0	99.972	0	4
GCA_000637435.1	2011-60-2078-5	95.981	100	0	0	0	0	0	0	0	0	0	0	0	99.792	97.358	100	0	99.967	0	3
GCA_000637455.1	2011-60-2256-5	97.991	0	0	0	0	0	99.81	0	0	0	0	0	0	99.792	0	100	0	99.983	0	2
GCA_000637475.1	2011-60-2275-1	95.981	99.869	0	0	0	0	99.728	0	0	0	0	0	0	99.792	100	100	0	99.972	0	4
GCA_000637495.1	22825	97.991	100	0	0	0	0	0	0	0	0	0	0	0	99.792	0	100	0	99.983	0	2
GCA_000637515.1	22835	97.991	100	0	0	0	0	99.81	0	0	0	0	0	0	99.792	0	100	0	99.983	0	3
GCA_000637535.1	22837	97.991	0	0	0	0	0	99.81	0	0	0	0	0	0	99.792	0	100	0	99.983	0	2
GCA_000637555.1	22838	97.991	100	0	0	0	0	99.81	0	0	0	0	0	0	99.792	0	100	0	99.983	0	3
GCA_000637575.1	22841	97.991	0	0	0	0	0	99.81	0	0	0	0	0	0	99.792	0	100	0	99.983	0	2
GCA_000637595.1	22843	97.991	0	0	0	0	0	99.81	0	0	0	0	0	0	99.792	0	100	0	99.983	0	2
GCA_000637615.1	22846	97.991	0	0	0	0	0	99.81	0	0	0	0	0	0	99.792	0	100	0	99.983	0	2
GCA_000637695.1	2393-19	0	0	0	0	0	0	99.873	0	0	0	0	0	0	99.74	0	100	0	99.978	0	2
GCA_000637635.1	22P79	97.991	99.882	0	0	0	0	99.873	0	0	0	0	0	0	99.792	0	100	0	99.983	0	3
GCA_000637655.1	23237	97.991	0	0	0	0	0	99.81	0	0	0	0	0	0	99.792	0	100	0	99.983	0	2
GCA_000637675.1	2393-15	97.991	0	0	0	0	0	99.873	0	0	0	0	0	0	99.74	0	100	0	99.978	0	2
GCA_000637715.1	25(2889)	95.981	0	0	0	0	0	99.873	0	0	0	0	0	0	99.792	0	100	0	99.972	0	2
GCA_000637735.1	27999-3	97.991	100	0	0	0	0	95.455	0	0	99.86	0	0	0	99.792	0	100	0	99.978	0	4
GCA_000637755.1	28(18S1K13-24-05)	95.981	99.869	0	0	0	0	99.728	0	0	0	0	0	0	99.792	97.358	100	0	99.972	0	4
GCA_000637775.1	36P1	95.745	100	0	0	0	0	99.863	0	0	0	0	0	0	99.792	0	100	0	99.972	0	3
GCA_000637795.1	36P5	95.745	100	0	0	0	0	100	0	0	0	0	0	0	99.792	0	100	0	99.972	0	3
GCA_000637815.1	37(18S2S5-05)	95.981	0	0	0	0	0	0	0	0	0	0	0	0	99.792	100	100	0	99.983	0	2
GCA_000637835.1	40P10	95.981	0	0	0	0	0	0	0	0	0	0	0	0	99.792	0	100	0	99.978	0	1
GCA_000637855.1	40P5 1_1	95.981	0	0	0	0	0	0	0	0	0	0	0	0	99.792	100	100	0	99.983	0	2
GCA_000637875.1	43P3	95.981	0	0	0	0	0	0	0	0	0	0	0	0	99.792	0	100	0	99.983	0	1
GCA_000637895.1	43P8	95.981	0	0	0	0	0	0	0	0	0	0	0	0	99.792	0	100	0	99.983	0	1
GCA_000637915.1	44(2608)	95.981	0	0	0	0	0	0	0	0	0	0	0	0	99.792	0	100	0	99.967	0	1
GCA_000637935.1	47P5	95.981	0	0	0	0	0	99.873	0	0	0	0	0	0	99.792	100	100	0	99.978	0	3
GCA_000637955.1	47P9	95.981	99.647	0	0	0	0	99.873	0	0	0	0	0	0	99.792	100	100	0	99.978	0	4
GCA_000637975.1	5670-1	97.991	99.647	0	0	0	0	99.873	0	0	0	0	0	0	99.792	0	100	0	99.983	0	3
GCA_000637995.1	56824-10	97.991	100	0	0	0	0	93.21	0	0	0	0	0	0	99.792	0	100	0	99.983	0	3
GCA_000638015.1	56824-15	97.991	0	0	0	0	0	0	0	0	99.86	0	0	0	99.792	0	100	0	99.978	0	2
GCA_000638035.1	56824-2	97.991	0	0	0	0	0	0	0	0	99.86	0	0	0	99.792	0	100	0	99.972	0	2
GCA_000638055.1	56824-21	97.991	100	0	0	0	0	0	0	0	99.86	0	0	0	99.792	0	100	0	99.972	0	3
GCA_000638075.1	56824-5	97.991	0	0	0	0	0	99.873	0	0	0	0	0	0	99.74	97.358	100	0	99.967	0	3
GCA_000638095.1	56824-7	97.991	0	0	0	0	0	99.81	0	0	0	0	0	0	99.792	100	100	0	99.983	0	3
GCA_000638135.1	6665-5	97.991	99.647	0	0	0	0	99.873	0	0	0	0	0	0	99.792	0	100	0	99.978	0	3
GCA_000638155.1	75495-3	97.991	99.869	0	0	0	0	99.873	0	0	0	0	0	0	99.74	97.358	100	0	99.967	0	4
GCA_000638175.1	76669-6	97.991	0	0	0	0	0	99.873	0	0	0	0	0	0	99.792	0	100	0	99.983	0	2
GCA_000638215.1	81070	97.991	0	0	0	0	0	99.81	0	0	0	0	0	0	99.792	0	100	0	99.983	0	2
GCA_000638235.1	84069-2	97.991	0	0	0	0	0	99.873	0	0	0	0	0	0	99.792	97.358	100	0	99.978	0	3
GCA_000638255.1	86770-7	97.991	99.647	0	0	0	0	99.873	0	0	0	0	0	0	99.792	0	100	0	99.983	0	3
GCA_000638275.1	87807-1	97.991	0	0	0	0	0	0	0	0	0	0	0	0	99.792	0	100	0	99.972	0	1
GCA_000638295.1	87807-11	97.991	99.647	0	0	0	0	99.873	0	0	0	0	0	0	99.792	0	100	0	99.983	0	3
GCA_000638315.1	87807-12	97.991	100	0	0	0	0	99.728	0	0	99.86	0	0	0	99.792	0	100	0	99.978	0	4
GCA_000638335.1	87807-16	97.991	99.647	0	0	0	0	99.873	0	0	0	0	0	0	99.792	0	100	0	99.983	0	3
GCA_000638355.1	87807-9	97.991	99.647	0	0	0	0	99.873	0	0	0	0	0	0	99.792	0	100	0	99.983	0	3
GCA_000638375.1	88088-1	97.991	100	0	0	0	0	95.455	0	0	99.86	0	0	0	99.792	0	100	0	99.978	0	4
GCA_000638395.1	88088-2	97.991	100	0	0	0	0	95.238	0	0	99.86	0	0	0	99.792	0	100	0	99.978	0	4
GCA_000638415.1	9P9	95.981	99.647	0	0	0	0	0	0	0	0	0	0	0	99.792	100	100	0	99.983	0	3
GCA_000638435.1	BG407	97.991	0	0	0	0	0	99.873	0	0	0	0	0	0	99.792	0	100	0	99.983	0	2
GCA_000638515.1	C1655	95.981	0	0	0	0	0	0	0	0	100	0	0	0	99.792	0	100	0	99.967	0	2
GCA_000638535.1	C1673	95.981	99.869	0	0	0	0	0	0	0	0	0	0	0	99.792	100	100	0	99.967	0	3
GCA_000638555.1	C1842	95.981	99.869	0	0	0	0	0	0	0	0	0	0	0	99.792	100	100	0	99.967	0	3
GCA_000638575.1	C1891	95.981	99.647	0	0	0	0	0	0	0	0	0	0	0	99.792	100	100	0	99.972	0	3
GCA_000638595.1	C1894	95.981	0	0	0	0	0	0	0	0	0	0	0	0	99.792	0	100	0	99.983	0	1
GCA_000638655.1	C2706	95.981	0	0	0	0	0	0	0	0	0	0	0	0	99.792	0	100	0	99.972	0	1
GCA_000638675.1	C2928	95.981	0	0	0	0	0	0	0	0	0	0	0	0	99.792	0	100	0	99.972	0	1
GCA_000638695.1	C2930	95.981	0	0	0	0	0	0	0	0	0	0	0	0	99.792	97.358	100	0	99.983	0	2
GCA_000638715.1	C2942	95.981	0	0	0	0	0	0	0	0	0	0	0	0	99.792	97.358	100	0	99.983	0	2
GCA_000638755.1	C3672	95.981	99.869	0	0	0	0	0	0	0	0	0	0	0	99.792	100	100	0	99.961	0	3
GCA_000638775.1	C3865	95.981	100	0	0	0	0	0	0	0	0	0	0	0	99.792	0	100	0	99.972	0	2
GCA_000638815.1	C4151	95.981	0	0	0	0	0	0	0	0	0	0	0	0	99.792	0	100	0	99.972	0	1
GCA_000638835.1	C4155	97.991	0	0	0	0	0	99.81	0	0	0	0	0	0	99.792	0	100	0	99.983	0	2
GCA_000638855.1	C4668	95.981	100	0	0	0	0	0	0	0	0	0	0	0	99.792	97.358	100	0	99.972	0	3
GCA_000638895.1	C5453	95.981	0	0	0	0	0	0	0	0	0	0	0	0	99.792	97.358	100	0	99.983	0	2
GCA_000638915.1	Chi-10	95.981	100	0	0	0	0	99.727	0	0	0	0	0	0	99.792	100	100	0	99.967	0	4
GCA_000638935.1	Chi-4	95.981	99.869	0	0	0	0	99.873	0	0	0	0	0	0	99.792	100	100	0	99.972	0	4
GCA_000638955.1	Chi-8	98.463	100	0	0	0	0	100	0	0	0	0	0	0	99.792	100	100	0	99.978	0	4
GCA_000638975.1	DICM09/00997-9HST2	95.981	0	0	0	0	0	0	0	0	0	0	0	0	99.792	0	100	0	99.972	0	1
GCA_000638995.1	DICM09/01587-13HST	95.981	0	0	0	0	0	99.873	0	0	0	0	0	0	99.792	0	100	0	99.967	0	2
GCA_000639015.1	FP_N239	97.991	100	0	0	0	0	95.455	0	0	0	0	0	0	99.792	0	100	0	99.983	0	3
GCA_000639035.1	FP_N5203 OX	97.991	0	0	0	0	0	99.873	0	0	0	0	0	0	99.792	97.358	100	0	99.978	0	3
GCA_000639055.1	FP_N5208 OX	97.991	100	0	0	0	0	0	0	0	0	0	0	0	99.792	0	100	0	99.983	0	2
GCA_000639075.1	GD2010-052	95.863	100	0	0	0	0	99.59	0	0	0	0	0	0	99.792	0	100	0	99.972	0	3
GCA_000639095.1	GD2010-061	95.981	0	0	0	0	0	0	0	0	0	0	0	0	99.792	0	100	0	99.978	0	1
GCA_000639115.1	GD2010-090	95.981	99.529	0	0	0	0	0	0	0	0	0	0	0	99.792	100	100	0	99.978	0	3
GCA_000639135.1	GD2010-102	95.981	100	0	0	0	0	0	0	0	0	0	0	0	99.792	97.358	100	0	99.972	0	3
GCA_000639155.1	GD2010-107	95.981	99.647	0	0	0	0	0	0	0	0	0	0	0	99.792	0	100	0	99.983	0	2
GCA_000639175.1	GD2010-110	95.981	0	0	0	0	0	0	0	0	0	0	0	0	99.792	0	100	0	99.983	0	1
GCA_000639195.1	GD2010-112	95.981	100	0	0	0	0	0	0	0	0	0	0	0	99.792	97.358	100	0	99.972	0	3
GCA_000639215.1	GD2010-115	95.981	100	0	0	0	0	0	0	0	0	0	0	0	99.792	97.358	100	0	99.972	0	3
GCA_000639235.1	GD2010-131	95.981	99.869	0	0	0	0	99.728	0	0	0	0	0	0	99.792	97.358	100	0	99.967	0	4
GCA_000639255.1	GD2010-147	95.981	0	0	0	0	0	0	0	0	0	0	0	0	99.74	0	100	0	99.961	0	1
GCA_000639275.1	GD2010-155	95.981	0	0	0	0	0	0	0	0	0	0	0	0	99.792	0	100	0	99.972	0	1
GCA_000639295.1	GD2010-158	95.981	0	0	0	0	0	0	0	0	0	0	0	0	99.792	0	100	0	99.972	0	1
GCA_000639315.1	GD2010-168	95.981	100	0	0	0	0	0	0	0	0	0	0	0	99.792	97.358	100	0	99.972	0	3
GCA_000639335.1	GD2010-177	95.981	100	0	0	0	0	0	0	0	0	0	0	0	99.792	97.358	100	0	99.972	0	3
GCA_000639355.1	M118-B	97.991	0	0	0	0	0	99.81	0	0	0	0	0	0	99.792	0	100	0	99.983	0	2
GCA_000639375.1	M267-1	97.991	0	0	0	0	0	99.81	0	0	0	0	0	0	99.792	0	100	0	99.983	0	2
GCA_000639395.1	M357	97.991	0	0	0	0	0	99.81	0	0	0	0	0	0	99.792	0	100	0	99.983	0	2
GCA_000639415.1	M457-1	97.991	0	0	0	0	0	99.81	0	0	0	0	0	0	99.792	0	100	0	99.983	0	2
GCA_000639435.1	M520-1	97.991	99.529	0	0	0	0	99.873	0	0	0	0	0	0	99.792	0	100	0	99.983	0	3
GCA_000639475.1	MRSA-136	98.463	100	0	0	0	0	100	0	0	0	0	0	0	99.792	0	100	0	99.972	0	3
GCA_000639755.1	Rd.3	95.981	0	0	0	0	0	0	0	0	0	0	0	0	99.792	97.358	100	0	99.972	0	2
GCA_000639775.1	Rd.40	95.981	0	0	0	0	0	0	0	0	0	0	0	0	99.792	0	100	0	99.972	0	1
GCA_000639795.1	Rd.51	98.463	100	0	0	0	0	100	0	0	0	0	0	0	99.792	100	100	0	99.983	0	4
GCA_000639895.1	S56_POEL	95.981	99.869	0	0	0	0	99.728	0	0	0	0	0	0	99.74	0	100	0	99.967	0	3
GCA_000639815.1	Rd.545	97.991	100	0	0	0	0	99.876	0	0	0	0	0	0	99.792	100	100	0	99.978	0	4
GCA_000639835.1	Rd.60	95.981	99.617	0	0	0	0	0	0	0	0	0	0	0	99.792	0	100	0	99.961	0	2
GCA_000639855.1	Rd.614	97.991	100	0	0	0	0	99.876	0	0	0	0	0	0	99.792	100	100	0	99.978	0	4
GCA_000639875.1	Rd.9	95.981	99.864	0	0	0	0	99.728	0	0	0	0	0	0	99.792	100	100	0	99.972	0	4
GCA_000639915.1	S62_POEL	95.981	0	0	0	0	0	0	0	0	100	0	0	0	99.792	0	100	0	99.972	0	2
GCA_000639935.1	S69_POEL	95.981	100	0	0	0	0	99.728	0	0	0	0	0	0	99.74	0	100	0	99.967	0	3
GCA_000639955.1	SARM C4155	97.991	0	0	0	0	0	99.81	0	0	0	0	0	0	99.792	0	100	0	99.983	0	2
GCA_000639975.1	SARM C5621	95.981	0	0	0	0	0	0	0	0	0	0	0	0	99.792	0	100	0	99.967	0	1
GCA_000639995.1	Sau 194	97.991	0	0	0	0	0	99.873	0	0	0	0	0	0	99.792	0	100	0	99.978	0	2
GCA_000640015.1	Sau 44	97.991	0	0	0	0	0	99.873	0	0	0	0	0	0	99.792	0	100	0	99.983	0	2
GCA_000640035.1	Sau 46	97.991	0	0	0	0	0	99.873	0	0	0	0	0	0	99.792	0	100	0	99.972	0	2
GCA_000640055.1	Sau 47	97.991	0	0	0	0	0	99.873	0	0	0	0	0	0	99.792	0	100	0	99.983	0	2
GCA_000640075.1	Sau 74	97.991	0	0	0	0	0	0	0	0	99.86	0	0	0	99.792	0	100	0	99.978	0	2
GCA_000640095.1	Sau 93	97.991	92.92	0	0	0	0	0	0	0	99.86	0	0	0	99.792	0	100	0	99.978	0	3
GCA_000640115.1	Sau 95	97.991	100	0	0	0	0	99.593	0	0	0	0	0	0	99.792	0	100	0	99.972	0	3
GCA_000640135.1	Sau 98	97.991	0	0	0	0	0	99.873	0	0	0	0	0	0	99.792	0	100	0	99.983	0	2
GCA_000640155.1	Sau 99	97.991	0	0	0	0	0	0	0	0	0	0	0	0	99.792	97.358	100	0	99.978	0	2
GCA_000640175.1	Tur-12	99.9	0	0	0	0	0	0	0	0	0	0	0	0	99.792	0	100	0	99.961	0	1
GCA_000640195.1	Tur-15	98.463	100	0	0	0	0	100	0	0	0	0	0	0	99.792	100	100	0	99.983	0	4
GCA_000640215.1	Tur-16	97.991	0	0	0	0	0	99.864	0	0	0	0	0	0	99.792	0	100	0	99.983	0	2
GCA_000640235.1	Tur-20	95.863	100	0	0	0	0	99.59	0	0	0	0	0	0	99.792	0	100	0	99.978	0	3
GCA_000640255.1	Tur-22	98.463	100	0	0	0	0	100	0	0	0	0	0	0	99.792	100	100	0	99.983	0	4
GCA_000640275.1	Tur-6	98.463	100	0	0	0	0	100	0	0	0	0	0	0	99.792	100	100	0	99.972	0	4
GCA_000640295.1	UB 08-116	97.991	0	0	0	0	0	99.81	0	0	0	0	0	0	99.792	0	100	0	99.983	0	2
GCA_000640315.1	UB 08-172	97.991	0	0	0	0	0	99.81	0	0	0	0	0	0	99.792	0	100	0	99.983	0	2
GCA_000640335.1	USA_1	95.863	100	0	0	0	0	99.727	0	0	0	0	0	0	99.688	0	99.799	0	99.961	0	3
GCA_000640355.1	USA_11	95.863	0	0	0	0	0	99.876	0	0	0	0	0	0	99.792	0	100	0	99.972	0	2
GCA_000640375.1	USA_12	95.863	100	0	0	0	0	99.727	0	0	0	0	0	0	99.792	0	99.799	0	99.978	0	3
GCA_000640395.1	USA_15	95.863	0	0	0	0	0	99.876	0	0	0	0	0	0	99.792	0	100	0	99.967	0	2
GCA_000640415.1	USA_8	95.863	100	0	0	0	0	99.727	0	0	0	0	0	0	99.792	0	99.799	0	99.978	0	3
GCA_000640435.1	USA_9	95.863	100	0	0	0	0	99.727	0	0	0	0	0	0	99.792	0	99.799	0	99.978	0	3
GCA_000640455.1	USA7	95.863	100	0	0	0	0	99.727	0	0	0	0	0	0	99.74	0	99.799	0	99.967	0	3
GCA_000640475.1	VE07/03048STA	97.991	0	0	0	0	0	99.873	0	0	0	0	0	0	99.792	0	100	0	99.983	0	2
GCA_000640495.1	VE08/02126ST1	95.981	0	0	0	0	0	99.873	0	0	0	0	0	0	99.792	0	100	0	99.983	0	2
GCA_000640515.1	VE08/02244ST1	95.981	0	0	0	0	0	99.873	0	0	0	0	0	0	99.792	0	100	0	99.983	0	2
GCA_000640535.1	VET0051R	95.981	99.529	0	0	0	0	0	0	0	0	0	0	0	99.792	0	99.799	0	99.967	0	2
GCA_000640555.1	VET0052R	95.981	0	0	0	0	0	99.81	0	0	0	0	0	0	99.792	100	100	0	99.983	0	3
GCA_000640575.1	VET0053R	95.863	99.529	0	0	0	0	98.949	0	0	0	0	0	0	99.792	0	100	0	99.972	0	3
GCA_000640595.1	VET0054R	95.981	0	0	0	0	0	0	0	0	0	0	0	0	99.792	0	100	0	99.972	0	1
GCA_000640615.1	VET0055R	95.981	0	0	0	0	0	99.81	0	0	0	0	0	0	99.792	100	100	0	99.983	0	3
GCA_000640635.1	VET0057R	95.981	99.869	0	0	0	0	99.728	0	0	0	0	0	0	99.792	97.358	100	0	99.972	0	4
GCA_000640655.1	VET0059R	95.981	99.869	0	0	0	0	99.728	0	0	0	0	0	0	99.792	97.358	100	0	99.972	0	4
GCA_000640675.1	VET0060R	95.981	99.869	0	0	0	0	99.728	0	0	0	0	0	0	99.792	97.358	100	0	99.972	0	4
GCA_000640695.1	VET0061R	95.981	99.869	0	0	0	0	99.728	0	0	0	0	0	0	99.792	100	100	0	99.972	0	4
GCA_000640715.1	VET0062R	95.981	0	0	0	0	0	0	0	0	99.93	0	0	0	99.792	0	100	0	99.972	0	2
GCA_000640735.1	VET0063R	95.981	0	0	0	0	0	99.048	0	0	0	0	0	0	99.792	0	99.799	0	99.972	0	2
GCA_000640755.1	VET0065R	95.981	0	0	0	0	0	0	0	0	0	0	0	0	99.74	0	100	0	99.978	0	1
GCA_000640775.1	VET0066R	95.981	0	0	0	0	0	0	0	0	0	0	0	0	99.792	0	100	0	99.972	0	1
GCA_000640795.1	VET0067R	95.981	0	0	0	0	0	0	0	0	0	0	0	0	99.792	0	100	0	99.972	0	1
GCA_000640815.1	VET0069R	95.981	99.869	0	0	0	0	99.728	0	0	0	0	0	0	99.792	100	100	0	99.972	0	4
GCA_000640835.1	VET0070R	95.981	0	0	0	0	0	99.048	0	0	0	0	0	0	99.792	0	99.799	0	99.972	0	2
GCA_000640855.1	VET0072R	95.981	99.869	0	0	0	0	99.048	0	0	0	0	0	0	99.792	97.358	100	0	99.972	0	4
GCA_000640875.1	VET0073R	95.981	99.869	0	0	0	0	99.048	0	0	0	0	0	0	99.792	97.358	100	0	99.972	0	4
GCA_000640895.1	VET0075R	95.981	0	0	0	0	0	0	0	0	0	0	0	0	99.792	0	100	0	99.978	0	1
GCA_000640915.1	VET0076R	95.981	0	0	0	0	0	0	0	0	0	0	0	0	99.792	100	100	0	99.978	0	2
GCA_000640935.1	VET0077R	95.981	99.78	0	0	0	0	100	0	0	0	0	0	0	94.023	0	100	0	99.983	0	3
GCA_000640955.1	VET0080R	95.981	99.647	0	0	0	0	0	0	0	0	0	0	0	99.792	0	100	0	99.972	0	2
GCA_000640975.1	VET0083R	95.981	0	0	0	0	0	0	0	0	0	0	0	0	99.792	0	100	0	99.972	0	1
GCA_000640995.1	VET0084R	95.981	0	0	0	0	0	99.81	0	0	0	0	0	0	99.792	100	100	0	99.983	0	3
GCA_000641015.1	VET0085R	95.981	0	0	0	0	0	99.81	0	0	0	0	0	0	99.792	100	100	0	99.983	0	3
GCA_000641035.1	VET0086R	95.981	0	0	0	0	0	0	0	0	0	0	0	0	99.792	0	100	0	99.972	0	1
GCA_000641055.1	VET0087R	95.981	0	0	0	0	0	0	0	0	0	0	0	0	99.792	0	100	0	99.972	0	1
GCA_000641075.1	VET0088R	95.981	99.869	0	0	0	0	99.728	0	0	0	0	0	0	99.792	97.358	100	0	99.972	0	4
GCA_000641095.1	VET0089R	95.981	0	0	0	0	0	99.048	0	0	99.93	0	0	0	99.792	0	100	0	99.972	0	3
GCA_000641115.1	VET0090R	95.981	0	0	0	0	0	0	0	0	99.93	0	0	0	99.792	0	100	0	99.972	0	2
GCA_000641135.1	VET0091R	95.981	99.869	0	0	0	0	99.728	0	0	0	0	0	0	99.792	97.358	100	0	99.972	0	4
GCA_000641155.1	VET0092R	95.981	0	0	0	0	0	0	0	0	0	0	0	0	99.792	0	99.799	0	99.972	0	1
GCA_000641175.1	VET0093R	95.981	0	0	0	0	0	0	0	0	0	0	0	0	99.792	0	99.799	0	99.972	0	1
GCA_000641195.1	VET0094R	95.745	99.529	0	0	0	0	99.048	0	0	0	0	0	0	99.792	0	100	0	0	0	3
GCA_000641215.1	VET0095R	95.981	99.647	0	0	0	0	0	0	0	0	0	0	0	99.792	0	100	0	99.972	0	2
GCA_000641235.1	VET0097R	95.981	99.529	0	0	0	0	99.048	0	0	0	0	0	0	99.792	0	100	0	99.983	0	3
GCA_000641255.1	VET0098R	95.981	0	0	0	0	0	0	0	0	0	0	0	0	99.792	0	100	0	99.972	0	1
GCA_000641275.1	VET0099R	95.981	0	0	0	0	0	0	0	0	0	0	0	0	99.792	0	100	0	99.972	0	1
GCA_000641295.1	VET0101R	95.981	0	0	0	0	0	0	0	0	0	0	0	0	99.74	0	100	0	99.978	0	1
GCA_000641315.1	VET0103R	95.981	0	0	0	0	0	0	0	0	0	0	0	0	99.792	0	100	0	99.983	0	1
GCA_000641335.1	VET0104R	95.981	0	0	0	0	0	0	0	0	0	0	0	0	99.792	0	100	0	99.972	0	1
GCA_000641355.1	VET0105R	95.981	99.764	0	0	0	0	99.048	0	0	0	0	0	0	99.792	97.358	100	0	99.972	0	4
GCA_000641375.1	VET0107R	95.981	0	0	0	0	0	99.048	0	0	0	0	0	0	99.792	97.358	100	0	99.972	0	3
GCA_000641395.1	VET0110R	95.863	100	0	0	0	0	99.59	0	0	0	0	0	0	99.792	100	100	0	99.956	0	4
GCA_000641415.1	VET0112R	95.981	99.529	0	0	0	0	0	0	0	0	0	0	0	99.792	0	99.799	0	99.967	0	2
GCA_000641435.1	VET0114R	95.981	0	0	0	0	0	99.048	0	0	0	0	0	0	99.792	0	100	0	99.978	0	2
GCA_000641455.1	VET0115R	95.981	100	0	0	0	0	0	0	0	0	0	0	0	99.792	97.358	100	0	99.972	0	3
GCA_000641475.1	VET0116R	95.981	100	0	0	0	0	0	0	0	0	0	0	0	99.792	97.358	100	0	99.972	0	3
GCA_000641495.1	VET0117R	95.863	0	0	0	0	0	0	0	0	0	0	0	0	99.792	0	100	0	99.972	0	1
GCA_000641515.1	VET0119R	95.981	0	0	0	0	0	98.96	0	0	0	0	0	0	99.792	0	100	0	99.983	0	2
GCA_000641535.1	VET0123R	95.981	100	0	0	0	0	0	0	0	0	0	0	0	99.792	100	100	0	99.972	0	3
GCA_000641555.1	VET0124R	95.981	100	0	0	0	0	99.864	0	0	0	0	0	0	99.792	100	100	0	99.972	0	4
GCA_000641575.1	VET0126R	95.981	99.869	0	0	0	0	99.728	0	0	0	0	0	0	99.792	97.358	100	0	99.972	0	4
GCA_000641595.1	VET0127R	95.981	99.764	0	0	0	0	0	0	0	0	0	0	0	99.792	97.358	100	0	99.967	0	3
GCA_000641615.1	VET0128R	95.981	99.869	0	0	0	0	99.728	0	0	0	0	0	0	99.792	99.797	100	0	99.972	0	4
GCA_000641635.1	VET0129R	95.981	99.869	0	0	0	0	99.048	0	0	0	0	0	0	99.792	100	100	0	99.972	0	4
GCA_000641655.1	VET0130R	95.981	99.869	0	0	0	0	99.728	0	0	0	0	0	0	99.792	100	100	0	99.972	0	4
GCA_000641675.1	VET0132R	95.981	99.869	0	0	0	0	99.728	0	0	0	0	0	0	99.792	100	100	0	99.972	0	4
GCA_000641695.1	VET0133R	95.981	0	0	0	0	0	0	0	0	0	0	0	0	99.792	0	99.799	0	99.972	0	1
GCA_000641715.1	VET0134R	95.981	99.764	0	0	0	0	0	0	0	0	0	0	0	99.792	97.358	100	0	99.972	0	3
GCA_000641735.1	VET0140R	95.981	0	0	0	0	0	0	0	0	0	0	0	0	99.792	0	100	0	99.972	0	1
GCA_000641755.1	VET0148R	95.981	0	0	0	0	0	0	0	0	0	0	0	0	99.792	0	100	0	99.983	0	1
GCA_000641775.1	VET0151R	95.981	0	0	0	0	0	99.048	0	0	0	0	0	0	99.792	0	100	0	99.978	0	2
GCA_000641895.1	VET0164R	95.981	100	0	0	0	0	99.048	0	0	0	0	0	0	99.792	97.358	100	0	99.972	0	4
GCA_000641795.1	VET0152R	95.981	100	0	0	0	0	0	0	0	0	0	0	0	99.792	97.358	100	0	99.972	0	3
GCA_000641815.1	VET0155R	95.981	99.869	0	0	0	0	99.728	0	0	0	0	0	0	99.792	97.358	100	0	99.972	0	4
GCA_000641835.1	VET0156R	95.981	0	0	0	0	0	0	0	0	0	0	0	0	99.792	0	99.799	0	99.967	0	1
GCA_000641855.1	VET0161R	97.991	0	0	0	0	0	0	0	0	0	0	0	0	99.792	100	100	0	99.978	0	2
GCA_000641875.1	VET0162R	95.981	0	0	0	0	0	0	0	0	0	0	0	0	99.792	0	99.799	0	99.972	0	1
GCA_000641915.1	VET0165R	95.981	0	0	0	0	0	0	0	0	0	0	0	0	99.792	100	100	0	99.983	0	2
GCA_000641935.1	VET0166R	95.981	100	0	0	0	0	0	0	0	0	0	0	0	99.792	97.358	100	0	99.972	0	3
GCA_000641955.1	VET0167R	95.981	100	0	0	0	0	0	0	0	0	0	0	0	99.792	97.358	100	0	99.972	0	3
GCA_000641975.1	VET0171R	95.981	99.647	0	0	0	0	0	0	0	0	0	0	0	99.792	100	100	0	99.967	0	3
GCA_000641995.1	VET0176R	95.981	99.529	0	0	0	0	0	0	0	0	0	0	0	99.792	97.358	99.799	0	99.972	0	3
GCA_000642015.1	VET0177R	95.981	0	0	0	0	0	0	0	0	0	0	0	0	99.792	0	100	0	99.95	0	1
GCA_000642035.1	VET0178R	95.981	0	0	0	0	0	0	0	0	0	0	0	0	99.792	0	100	0	99.983	0	1
GCA_000642055.1	VET0179R	95.981	0	0	0	0	0	99.048	0	0	0	0	0	0	99.792	0	100	0	99.983	0	2
GCA_000642075.1	VET0180R	95.981	99.647	0	0	0	0	0	0	0	0	0	0	0	99.792	0	100	0	99.972	0	2
GCA_000642095.1	VET0188R	95.981	100	0	0	0	0	0	0	0	0	0	0	0	99.792	97.358	100	0	99.972	0	3
GCA_000642115.1	VET0189R	95.981	100	0	0	0	0	0	0	0	0	0	0	0	99.792	97.358	100	0	99.972	0	3
GCA_000642135.1	VET0190R	97.991	0	0	0	0	0	99.048	0	0	0	0	0	0	99.792	100	100	0	99.958	0	3
GCA_000642155.1	VET0192R	95.981	0	0	0	0	0	0	0	0	0	0	0	0	99.792	0	100	0	99.983	0	1
GCA_000642175.1	VET0193R	95.981	0	0	0	0	0	0	0	0	0	0	0	0	99.792	0	100	0	99.972	0	1
GCA_000642195.1	VET0194R	95.981	0	0	0	0	0	100	0	0	0	0	0	0	99.792	100	100	0	99.983	0	3
GCA_000642215.1	VET0195R	95.863	100	0	0	0	0	99.59	0	0	0	0	0	0	99.792	0	100	0	99.972	0	3
GCA_000642235.1	VET0198R	95.981	100	0	0	0	0	0	0	0	0	0	0	0	99.792	97.358	100	0	99.972	0	3
GCA_000642255.1	VET0200R	95.981	0	0	0	0	0	0	0	0	0	0	0	0	99.792	0	100	0	99.978	0	1
GCA_000642275.1	VET0212R	95.981	99.529	0	0	0	0	0	0	0	0	0	0	0	99.792	0	99.799	0	99.972	0	2
GCA_000642295.1	VET0213R	95.981	99.869	0	0	0	0	99.728	0	0	0	0	0	0	99.792	100	100	0	99.972	0	4
GCA_000642315.1	VET0214R	95.981	0	0	0	0	0	0	0	0	0	0	0	0	99.792	0	99.799	0	99.972	0	1
GCA_000642335.1	VET0215R	95.981	100	0	0	0	0	99.728	0	0	0	0	0	0	99.792	97.358	100	0	99.972	0	4
GCA_000642355.1	VET0216R	95.981	100	0	0	0	0	0	0	0	0	0	0	0	99.792	97.358	100	0	99.972	0	3
GCA_000642375.1	VET0217R	95.981	100	0	0	0	0	0	0	0	0	0	0	0	99.792	97.358	100	0	99.972	0	3
GCA_000642395.1	VET0218R	95.981	100	0	0	0	0	0	0	0	0	0	0	0	99.792	97.358	100	0	99.967	0	3
GCA_000642415.1	VET0221R	95.981	100	0	0	0	0	99.048	0	0	0	0	0	0	99.792	97.358	100	0	99.972	0	4
GCA_000642435.1	VET0222R	95.981	0	0	0	0	0	0	0	0	0	0	0	0	99.74	0	100	0	99.978	0	1
GCA_000642455.1	VET0224R	95.981	99.869	0	0	0	0	99.728	0	0	0	0	0	0	99.792	97.358	100	0	99.972	0	4
GCA_000642475.1	VET0227R	95.981	0	0	0	0	0	0	0	0	0	0	0	0	99.792	0	100	0	99.978	0	1
GCA_000642495.1	VET0228R	95.981	100	0	0	0	0	99.728	0	0	0	0	0	0	99.792	97.358	100	0	99.972	0	4
GCA_000642515.1	VET0230R	95.981	99.869	0	0	0	0	99.726	0	0	0	0	0	0	99.792	100	100	0	99.972	0	4
GCA_000642535.1	VET0236R	95.981	0	0	0	0	0	0	0	0	0	0	0	0	99.792	0	99.799	0	99.967	0	1
GCA_000642555.1	VET0237R	95.981	0	0	0	0	0	0	0	0	0	0	0	0	99.792	0	99.799	0	99.967	0	1
GCA_000642575.1	VET0241R	95.981	0	0	0	0	0	0	0	0	0	0	0	0	99.792	0	99.799	0	99.967	0	1
GCA_000642595.1	VET0243R	95.981	100	0	0	0	0	99.593	0	0	0	0	0	0	99.792	0	100	0	99.978	0	3
GCA_000642615.1	VET0247R	95.981	100	0	0	0	0	99.864	0	0	0	0	0	0	99.792	100	100	0	99.972	0	4
GCA_000642635.1	VET0249R	95.981	0	0	0	0	0	0	0	0	99.93	0	0	0	99.792	0	100	0	99.972	0	2
GCA_000642655.1	VET0252R	95.981	99.869	0	0	0	0	99.728	0	0	0	0	0	0	99.792	97.358	100	0	99.972	0	4
GCA_000642675.1	VET0253R	95.981	99.869	0	0	0	0	99.728	0	0	0	0	0	0	99.792	97.358	100	0	99.972	0	4
GCA_000642695.1	VET0254R	98.463	100	0	0	0	0	100	0	0	0	0	0	0	99.792	100	100	0	99.978	0	4
GCA_000642715.1	VET0256R	95.981	0	0	0	0	0	0	0	0	0	0	0	0	99.792	100	100	0	99.983	0	2
GCA_000642735.1	VET0259R	95.981	0	0	0	0	0	0	0	0	0	0	0	0	99.792	97.358	100	0	99.972	0	2
GCA_000642755.1	VET0260R	95.981	100	0	0	0	0	0	0	0	0	0	0	0	99.792	97.358	100	0	99.972	0	3
GCA_000642775.1	VET0261R	95.981	100	0	0	0	0	0	0	0	0	0	0	0	99.792	97.358	100	0	99.972	0	3
GCA_000642795.1	VET0263R	95.981	100	0	0	0	0	0	0	0	0	0	0	0	99.792	97.358	100	0	99.972	0	3
GCA_000642815.1	VET0267R	98.463	100	0	0	0	0	100	0	0	0	0	0	0	99.792	100	100	0	99.978	0	4
GCA_000642835.1	VET0268R	95.981	0	0	0	0	0	0	0	0	0	0	0	0	99.792	0	100	0	99.983	0	1
GCA_000642855.1	VET0269R	95.981	0	0	0	0	0	99.048	0	0	0	0	0	0	99.792	0	100	0	99.983	0	2
GCA_000642875.1	VET0270R	95.981	0	0	0	0	0	99.048	0	0	0	0	0	0	99.792	0	100	0	99.978	0	2
GCA_000642895.1	VET0271R	95.981	0	0	0	0	0	0	0	0	0	0	0	0	99.792	0	100	0	99.978	0	1
GCA_000642915.1	VET0275R	95.981	99.529	0	0	0	0	0	0	0	0	0	0	0	99.792	0	100	0	99.972	0	2
GCA_000642935.1	VET0278R	95.981	0	0	0	0	0	0	0	0	0	0	0	0	99.792	0	100	0	99.983	0	1
GCA_000642955.1	VET0279R	95.981	0	0	0	0	0	0	0	0	0	0	0	0	99.792	0	100	0	99.972	0	1
GCA_000642975.1	VET0280R	95.981	0	0	0	0	0	0	0	0	0	0	0	0	99.792	0	100	0	99.972	0	1
GCA_000642995.1	VET0282R	95.981	100	0	0	0	0	0	0	0	0	0	0	0	99.792	97.358	100	0	99.972	0	3
GCA_000643015.1	VET0283R	95.981	99.78	0	0	0	0	100	0	0	0	0	0	0	94.023	0	100	0	99.983	0	3
GCA_000643035.1	VET0284R	95.981	0	0	0	0	0	0	0	0	0	0	0	0	99.792	0	100	0	99.983	0	1
GCA_000643055.1	VET0286R	95.981	100	0	0	0	0	0	0	0	0	0	0	0	99.792	97.358	100	0	99.972	0	3
GCA_000643075.1	VET0287R	95.981	99.78	0	0	0	0	100	0	0	0	0	0	0	94.023	0	100	0	99.983	0	3
GCA_000643095.1	VET0288R	95.981	0	0	0	0	0	0	0	0	0	0	0	0	99.792	0	99.799	0	99.967	0	1
GCA_000643115.1	VET0289R	95.981	0	0	0	0	0	0	0	0	0	0	0	0	99.792	0	100	0	99.978	0	1
GCA_000643135.1	VET0290R	95.981	0	0	0	0	0	0	0	0	0	0	0	0	99.792	0	100	0	99.978	0	1
GCA_000643155.1	VET0291R	95.981	0	0	0	0	0	0	0	0	0	0	0	0	99.792	0	100	0	99.978	0	1
GCA_000643175.1	VET0292R	95.863	0	0	0	0	0	0	0	0	0	0	0	0	99.792	0	100	0	99.972	0	1
GCA_000643195.1	VET0294R	95.981	0	0	0	0	0	0	0	0	0	0	0	0	99.792	0	100	0	99.978	0	1
GCA_000643215.1	VET0295R	95.981	0	0	0	0	0	0	0	0	0	0	0	0	99.792	0	100	0	99.972	0	1
GCA_000643235.1	VET0296R	95.981	100	0	0	0	0	99.048	0	0	0	0	0	0	99.792	97.358	100	0	99.972	0	4
GCA_000643255.1	VET0297R	95.981	0	0	0	0	0	0	0	0	0	0	0	0	99.792	0	100	0	99.978	0	1
GCA_000643275.1	VET0299R	95.981	0	0	0	0	0	0	0	0	0	0	0	0	99.792	0	100	0	99.972	0	1
GCA_000643295.1	VET0300R	95.981	99.869	0	0	0	0	99.728	0	0	0	0	0	0	99.792	100	100	0	99.972	0	4
GCA_000643315.1	VET0302R	95.981	99.764	0	0	0	0	100	0	0	0	0	0	0	99.792	100	100	0	99.983	0	4
GCA_000643335.1	VET0303R	95.981	99.764	0	0	0	0	99.81	0	0	0	0	0	0	99.792	100	100	0	99.983	0	4
GCA_000643355.1	VET0304R	95.981	99.869	0	0	0	0	99.728	0	0	0	0	0	0	99.792	97.358	100	0	99.972	0	4
GCA_000643375.1	VET0305R	95.981	99.869	0	0	0	0	99.728	0	0	0	0	0	0	99.792	97.358	100	0	99.972	0	4
GCA_000643395.1	VET0307R	95.981	100	0	0	0	0	0	0	0	0	0	0	0	99.792	97.358	100	0	99.972	0	3
GCA_000643415.1	VET0308R	95.981	0	0	0	0	0	0	0	0	0	0	0	0	99.792	0	99.799	0	99.967	0	1
GCA_000643435.1	VET0309R	95.981	0	0	0	0	0	0	0	0	0	0	0	0	99.792	0	99.799	0	99.967	0	1
GCA_000643455.1	VET0312R	95.863	100	0	0	0	0	99.59	0	0	0	0	0	0	99.792	0	100	0	99.972	0	3
GCA_000643475.1	VET0313R	95.981	100	0	0	0	0	0	0	0	0	0	0	0	99.792	97.358	100	0	99.972	0	3
GCA_000643495.1	VET0314R	95.981	100	0	0	0	0	0	0	0	0	0	0	0	99.792	97.358	100	0	99.972	0	3
GCA_000643515.1	VET0315R	95.981	0	0	0	0	0	0	0	0	0	0	0	0	99.792	0	100	0	99.972	0	1
GCA_000643535.1	VET0316R	95.981	0	0	0	0	0	99.746	0	0	0	0	0	0	99.792	0	100	0	99.978	0	2
GCA_000643555.1	VET0317R	95.981	0	0	0	0	0	0	0	0	0	0	0	0	99.792	0	99.799	0	99.972	0	1
GCA_000643575.1	VET0318R	95.981	0	0	0	0	0	0	0	0	0	0	0	0	99.792	0	99.799	0	99.972	0	1
GCA_000643595.1	VET0320R	95.981	0	0	0	0	0	0	0	0	0	0	0	0	99.792	0	100	0	99.983	0	1
GCA_000643615.1	VET0322R	95.981	0	0	0	0	0	0	0	0	99.93	0	0	0	99.792	0	100	0	99.972	0	2
GCA_000643635.1	VET0323R	95.981	0	0	0	0	0	0	0	0	99.93	0	0	0	99.792	0	100	0	99.972	0	2
GCA_000643655.1	VET0325R	95.981	100	0	0	0	0	0	0	0	0	0	0	0	99.792	97.358	100	0	99.972	0	3
GCA_000643675.1	VET0326R	95.981	100	0	0	0	0	0	0	0	0	0	0	0	99.792	97.358	100	0	99.972	0	3
GCA_000643695.1	VET0329R	95.981	0	0	0	0	0	0	0	0	0	0	0	0	99.792	0	100	0	99.978	0	1
GCA_000643715.1	VET0331R	95.981	0	0	0	0	0	0	0	0	0	0	0	0	99.792	0	100	0	99.983	0	1
GCA_000643735.1	VET0333R	95.981	99.864	0	0	0	0	99.728	0	0	0	0	0	0	99.792	97.358	100	0	99.972	0	4
GCA_000643755.1	VET0335R	95.981	99.864	0	0	0	0	99.728	0	0	0	0	0	0	99.792	97.358	100	0	99.972	0	4
GCA_000643915.1	VET0354R	95.981	0	0	0	0	0	0	0	0	0	0	0	0	99.792	0	100	0	99.972	0	1
GCA_000643775.1	VET0336R	95.981	99.529	0	0	0	0	0	0	0	0	0	0	0	99.792	0	100	0	99.972	0	2
GCA_000643795.1	VET0337R	95.981	0	0	0	0	0	0	0	0	0	0	0	0	99.792	0	100	0	99.983	0	1
GCA_000643815.1	VET0338R	95.981	0	0	0	0	0	0	0	0	0	0	0	0	99.74	0	100	0	99.978	0	1
GCA_000643835.1	VET0339R	95.981	99.647	0	0	0	0	0	0	0	0	0	0	0	99.792	0	100	0	99.972	0	2
GCA_000643855.1	VET0340R	95.981	99.647	0	0	0	0	0	0	0	0	0	0	0	99.792	0	100	0	99.972	0	2
GCA_000643875.1	VET0341R	95.981	100	0	0	0	0	99.593	0	0	0	0	0	0	99.792	0	100	0	99.978	0	3
GCA_000643935.1	VET0357R	95.981	0	0	0	0	0	0	0	0	0	0	0	0	99.792	0	99.799	0	99.972	0	1
GCA_000643955.1	VET0359R	95.981	0	0	0	0	0	0	0	0	0	0	0	0	99.792	0	100	0	99.972	0	1
GCA_000643975.1	VET0360R	95.981	99.869	0	0	0	0	100	0	0	0	0	0	0	99.792	0	100	0	99.972	0	3
GCA_000643995.1	VET0363R	95.981	100	0	0	0	0	0	0	0	0	0	0	0	99.792	100	100	0	99.972	0	3
GCA_000644015.1	VET0366R	95.981	99.869	0	0	0	0	0	0	0	0	0	0	0	99.792	97.358	100	0	99.972	0	3
GCA_000644035.1	VET0367R	95.981	99.869	0	0	0	0	99.713	0	0	0	0	0	0	99.792	97.358	100	0	99.972	0	4
GCA_000644055.1	VET0369R	95.981	0	0	0	0	0	0	0	0	0	0	0	0	99.792	100	100	0	99.983	0	2
GCA_000644075.1	VET0373R	95.981	100	0	0	0	0	99.048	0	0	0	0	0	0	99.792	97.358	100	0	99.972	0	4
GCA_000644095.1	VET0376R	95.981	100	0	0	0	0	0	0	0	0	0	0	0	99.792	97.358	100	0	99.972	0	3
GCA_000644115.1	VET0382R	95.981	0	0	0	0	0	0	0	0	0	0	0	0	99.792	0	100	0	99.972	0	1
GCA_000644135.1	VET0383R	95.981	0	0	0	0	0	0	0	0	0	0	0	0	99.792	0	100	0	99.972	0	1
GCA_000644155.1	VET0384R	95.981	100	0	0	0	0	0	0	0	0	0	0	0	99.792	97.358	100	0	99.972	0	3
GCA_000644175.1	VET0387R	95.981	0	0	0	0	0	0	0	0	0	0	0	0	99.792	0	100	0	99.983	0	1
GCA_000644195.1	VET0388R	95.981	0	0	0	0	0	0	0	0	0	0	0	0	99.792	0	100	0	99.978	0	1
GCA_000644215.1	VET0389R	95.981	0	0	0	0	0	99.048	0	0	0	0	0	0	99.792	0	100	0	99.978	0	2
GCA_000644235.1	VET0390R	95.981	0	0	0	0	0	0	0	0	0	0	0	0	99.792	0	100	0	99.983	0	1
GCA_000644255.1	VET0393R	95.981	99.529	0	0	0	0	0	0	0	0	0	0	0	99.792	0	100	0	99.983	0	2
GCA_000644275.1	VET0394R	95.981	0	0	0	0	0	0	0	0	0	0	0	0	99.792	0	100	0	99.983	0	1
GCA_000644295.1	VET0395R	95.981	0	0	0	0	0	0	0	0	0	0	0	0	99.792	0	100	0	99.983	0	1
GCA_000644315.1	VET0396R	95.981	99.78	0	0	0	0	100	0	0	0	0	0	0	94.023	0	100	0	99.983	0	3
GCA_000644335.1	VET0399R	95.981	0	0	0	0	0	99.746	0	0	0	0	0	0	99.792	0	100	0	99.978	0	2
GCA_000644355.1	VET0401R	95.981	100	0	0	0	0	0	0	0	0	0	0	0	99.792	100	100	0	99.972	0	3
GCA_000644375.1	VET0402R	95.981	100	0	0	0	0	0	0	0	0	0	0	0	99.792	97.358	100	0	99.972	0	3
GCA_000644395.1	VET0403R	95.981	0	0	0	0	0	0	0	0	0	0	0	0	99.792	0	100	0	99.978	0	1
GCA_000644415.1	VET0406R	95.981	99.869	0	0	0	0	99.728	0	0	0	0	0	0	99.792	97.358	100	0	99.972	0	4
GCA_000644435.1	VET0407R	95.981	100	0	0	0	0	0	0	0	0	0	0	0	99.792	97.358	100	0	99.972	0	3
GCA_000644455.1	VET0410R	95.981	0	0	0	0	0	0	0	0	0	0	0	0	99.792	0	100	0	99.972	0	1
GCA_000644475.1	VET0411R	95.981	99.869	0	0	0	0	99.728	0	0	0	0	0	0	99.792	100	100	0	99.972	0	4
GCA_000644495.1	VET0412R	95.981	0	0	0	0	0	0	0	0	0	0	0	0	99.792	0	100	0	99.972	0	1
GCA_000644515.1	VET0413R	98.345	99.529	0	0	0	0	99.873	0	0	0	0	0	0	99.792	0	100	0	99.983	0	3
GCA_000644535.1	VET0415R	95.981	99.869	0	0	0	0	99.728	0	0	0	0	0	0	99.792	97.358	100	0	99.972	0	4
GCA_000644555.1	VET0417R	95.981	99.869	0	0	0	0	99.728	0	0	0	0	0	0	99.792	0	100	0	99.972	0	3
GCA_000644575.1	VET0418R	95.981	99.869	0	0	0	0	99.728	0	0	0	0	0	0	99.792	0	100	0	99.972	0	3
GCA_000644595.1	VET0421R	95.981	100	0	0	0	0	99.864	0	0	0	0	0	0	99.792	100	100	0	99.983	0	4
GCA_000644615.1	VET0423R	95.981	0	0	0	0	0	0	0	0	0	0	0	0	99.792	0	99.799	0	99.972	0	1
GCA_000644635.1	VET0425R	95.981	0	0	0	0	0	0	0	0	0	0	0	0	99.792	0	100	0	99.978	0	1
GCA_000644655.1	VET0427R	95.981	0	0	0	0	0	0	0	0	0	0	0	0	99.792	0	100	0	99.972	0	1
GCA_000644675.1	VET0428R	95.981	0	0	0	0	0	0	0	0	0	0	0	0	99.792	0	100	0	99.978	0	1
GCA_000644695.1	VET0431R	95.981	100	0	0	0	0	0	0	0	0	0	0	0	99.792	97.358	100	0	99.972	0	3
GCA_000644715.1	VET0432R	95.981	0	0	0	0	0	0	0	0	0	0	0	0	99.792	0	100	0	99.972	0	1
GCA_000644735.1	VET0433R	95.981	99.647	0	0	0	0	0	0	0	0	0	0	0	99.792	0	100	0	99.972	0	2
GCA_000644755.1	VET0434R	95.981	99.647	0	0	0	0	0	0	0	0	0	0	0	99.792	0	100	0	99.972	0	2
GCA_000644775.1	VET0435R	95.981	0	0	0	0	0	0	0	0	0	0	0	0	99.792	97.358	100	0	99.972	0	2
GCA_000644795.1	VET0438R	95.981	0	0	0	0	0	0	0	0	0	0	0	0	99.74	0	100	0	99.978	0	1
GCA_000644815.1	VET0439R	95.981	0	0	0	0	0	99.048	0	0	0	0	0	0	99.792	0	100	0	99.983	0	2
GCA_000644835.1	VET0440R	95.745	0	0	0	0	0	0	0	0	0	0	0	0	99.792	0	100	0	99.972	0	1
GCA_000644855.1	VET0442R	95.981	0	0	0	0	0	0	0	0	0	0	0	0	99.792	0	100	0	99.983	0	1
GCA_000644875.1	VET0443R	95.981	99.864	0	0	0	0	99.728	0	0	0	0	0	0	99.792	97.358	100	0	99.972	0	4
GCA_000644895.1	VET0444R	95.745	99.529	0	0	0	0	0	0	0	0	0	0	0	99.792	0	100	0	99.972	0	2
GCA_000644915.1	VET0446R	95.981	0	0	0	0	0	0	0	0	0	0	0	0	99.792	0	100	0	99.983	0	1
GCA_000644935.1	VET0451R	95.981	100	0	0	0	0	0	0	0	0	0	0	0	99.792	97.358	100	0	99.972	0	3
GCA_000644955.1	VET0452R	95.981	100	0	0	0	0	0	0	0	0	0	0	0	99.792	97.358	100	0	99.972	0	3
GCA_000644975.1	VET0454R	95.981	0	0	0	0	0	0	0	0	0	0	0	0	99.792	0	100	0	99.978	0	1
GCA_000644995.1	VET0455R	95.981	100	0	0	0	0	0	0	0	0	0	0	0	99.792	97.358	100	0	99.972	0	3
GCA_000645015.1	VET0456R	95.981	100	0	0	0	0	0	0	0	0	0	0	0	99.792	97.358	100	0	99.972	0	3
GCA_000645035.1	VET0459R	95.981	99.869	0	0	0	0	100	0	0	0	0	0	0	99.792	0	100	0	99.972	0	3
GCA_000645055.1	VET0460R	95.981	99.869	0	0	0	0	100	0	0	0	0	0	0	99.792	0	100	0	99.972	0	3
GCA_000645075.1	VET0462R	95.981	0	0	0	0	0	99.048	0	0	0	0	0	0	99.792	0	100	0	99.972	0	2
GCA_000645095.1	VET0463R	95.981	0	0	0	0	0	0	0	0	0	0	0	0	99.792	0	100	0	99.972	0	1
GCA_000645115.1	VET0464R	95.981	100	0	0	0	0	0	0	0	0	0	0	0	99.792	97.358	100	0	99.972	0	3
GCA_000645135.1	VET0465R	95.981	100	0	0	0	0	98.988	0	0	0	0	0	0	99.792	97.358	100	0	99.972	0	4
GCA_000645155.1	VET0468R	95.981	99.869	0	0	0	0	99.728	0	0	0	0	0	0	99.792	97.358	100	0	99.972	0	4
GCA_000645175.1	VET0470R	95.981	0	0	0	0	0	0	0	0	0	0	0	0	99.792	100	100	0	99.983	0	2
GCA_000645195.1	VET0478R	95.981	0	0	0	0	0	0	0	0	0	0	0	0	99.792	97.358	100	0	99.972	0	2
GCA_000645215.1	VET0481R	95.981	100	0	0	0	0	0	0	0	0	0	0	0	99.792	97.358	100	0	99.972	0	3
GCA_000645235.1	VET0485R	95.981	100	0	0	0	0	0	0	0	0	0	0	0	99.792	97.358	100	0	99.972	0	3
GCA_000645255.1	VET0486R	95.981	100	0	0	0	0	99.048	0	0	0	0	0	0	99.792	97.358	100	0	99.972	0	4
GCA_000645275.1	VET0488R	95.981	99.869	0	0	0	0	99.728	0	0	0	0	0	0	99.792	97.358	100	0	99.972	0	4
GCA_000645295.1	VET0519S	95.981	0	0	0	0	0	0	0	0	0	0	0	0	99.792	0	100	0	99.972	0	1
GCA_000645315.1	VET0596R	95.981	0	0	0	0	0	0	0	0	0	0	0	0	99.792	0	100	0	99.972	0	1
GCA_000645355.1	VET0645S	96.927	0	0	0	0	0	0	0	0	0	0	0	0	99.792	100	100	0	99.983	0	2
GCA_000645375.1	VET0657S	95.981	0	0	0	0	0	99.746	0	0	0	0	0	0	99.792	100	100	0	99.983	0	3
GCA_000645435.1	VET0779S	95.745	0	0	0	0	0	0	0	0	0	0	0	0	99.792	0	100	0	99.972	0	1
GCA_000645455.1	VET0787S	95.745	99.747	0	0	0	0	0	0	0	0	0	0	0	99.792	0	100	0	99.961	0	2
GCA_000645475.1	VET0809S	95.981	99.529	0	0	0	0	0	0	0	0	0	0	0	99.792	100	100	0	99.978	0	3
GCA_000645495.1	VET0810S	95.981	99.529	0	0	0	0	0	0	0	0	0	0	0	99.792	100	100	0	99.978	0	3
GCA_000645535.1	VET0919S	95.863	0	0	0	0	0	0	0	0	0	0	0	0	99.792	100	100	0	99.978	0	2
GCA_000645555.1	VET0920S	95.863	0	0	0	0	0	0	0	0	0	0	0	0	99.792	100	100	0	99.983	0	2
GCA_000645655.1	VET1035S	98.463	100	0	0	0	0	0	0	0	99.86	0	0	0	99.792	100	100	0	99.983	0	4
GCA_000645675.1	VET1048S	98.463	100	0	0	0	0	0	0	0	99.86	0	0	0	99.792	0	100	0	99.983	0	3
GCA_000645695.1	VET1052S	0	99.764	0	0	0	0	0	0	0	0	0	0	0	99.792	100	100	0	99.978	0	3
GCA_000645715.1	VET1054S	95.745	0	0	0	0	0	0	0	0	0	0	0	0	99.792	0	100	0	99.972	0	1
GCA_000645735.1	VET1068S	95.745	0	0	0	0	0	0	0	0	0	0	0	0	99.792	0	100	0	99.972	0	1
GCA_000645755.1	VET1088S	95.981	99.529	0	0	0	0	0	0	0	0	0	0	0	99.74	0	99.799	0	99.967	0	2
GCA_000645775.1	VET1104S	98.463	100	0	0	0	0	100	0	0	0	0	0	0	99.792	100	100	0	99.983	0	4
GCA_000645795.1	VET1168S	98.463	100	0	0	0	0	100	0	0	0	0	0	0	99.792	0	100	0	99.967	0	3
GCA_000645815.1	VET1181S	95.981	0	0	0	0	0	0	0	0	0	0	0	0	99.792	100	100	0	99.978	0	2
GCA_000645835.1	VET1245S	95.863	100	0	0	0	0	99.59	0	0	0	0	0	0	99.74	0	100	0	99.967	0	3
GCA_000645855.1	VET1411S	98.463	100	0	0	0	0	100	0	0	0	0	0	0	99.792	100	100	0	99.983	0	4
GCA_000645875.1	VET1434S	98.463	100	0	0	0	0	100	0	0	0	0	0	0	99.792	100	100	0	99.978	0	4
GCA_000645895.1	VET1468S	98.463	100	0	0	0	0	100	0	0	0	0	0	0	99.792	0	100	0	99.972	0	3
GCA_000645915.1	VET1495S	95.981	0	0	0	0	0	0	0	0	0	0	0	0	99.792	0	100	0	99.972	0	1
GCA_000646135.1	VET1817S	98.463	100	0	0	0	0	100	0	0	0	0	0	0	99.792	100	100	0	99.978	0	4
GCA_000645935.1	VET1499S	95.863	100	0	0	0	0	99.59	0	0	0	0	0	0	99.74	0	100	0	99.967	0	3
GCA_000645975.1	VET1519S	95.981	0	0	0	0	0	0	0	0	0	0	0	0	99.792	100	100	0	99.978	0	2
GCA_000645995.1	VET1526S	95.981	92.92	0	0	0	0	99.746	0	0	0	0	0	0	99.792	100	100	0	99.983	0	4
GCA_000646055.1	VET1727S	98.463	0	0	0	0	0	0	0	0	99.86	0	0	0	99.792	100	100	0	99.983	0	3
GCA_000646075.1	VET1738S	95.981	99.529	0	0	0	0	0	0	0	0	0	0	0	99.74	0	99.799	0	99.967	0	2
GCA_000646095.1	VET1779S	95.981	0	0	0	0	0	0	0	0	0	0	0	0	99.792	100	100	0	99.978	0	2
GCA_000646115.1	VET1816S	98.463	100	0	0	0	0	100	0	0	0	0	0	0	99.792	100	100	0	99.978	0	4
GCA_000646155.1	VET1822S	98.463	100	0	0	0	0	100	0	0	0	0	0	0	99.792	0	100	0	99.972	0	3
GCA_000646175.1	VET1831R	97.991	100	0	0	0	0	99.876	0	0	0	0	0	0	99.792	100	100	0	99.978	0	4
GCA_000646195.1	VET1832R	95.981	100	0	0	0	0	0	0	0	0	0	0	0	99.792	100	100	0	99.972	0	3
GCA_000646215.1	VET1834R	95.981	99.869	0	0	0	0	99.728	0	0	0	0	0	0	99.792	97.358	100	0	99.972	0	4
GCA_000646235.1	VET1835R	95.981	99.869	0	0	0	0	99.728	0	0	0	0	0	0	99.792	97.358	100	0	99.972	0	4
GCA_000646255.1	VET1838R	95.981	100	0	0	0	0	99.048	0	0	0	0	0	0	99.792	97.358	100	0	99.972	0	4
GCA_000646275.1	VET1839R	95.981	100	0	0	0	0	99.048	0	0	0	0	0	0	99.792	97.358	100	0	99.972	0	4
GCA_000646295.1	VET1843R	95.981	100	0	0	0	0	0	0	0	0	0	0	0	99.792	97.358	100	0	99.972	0	3
GCA_000646315.1	VET1844R	95.981	99.52	0	0	0	0	98.912	0	0	0	0	0	0	99.792	0	100	0	99.978	0	3
GCA_000646335.1	VET1845R	95.981	99.529	0	0	0	0	0	0	0	0	0	0	0	99.792	0	100	0	99.978	0	2
GCA_000646355.1	VET1846R	95.981	0	0	0	0	0	0	0	0	0	0	0	0	99.792	0	100	0	99.978	0	1
GCA_000646375.1	VET1848R	95.981	0	0	0	0	0	0	0	0	0	0	0	0	99.792	0	100	0	99.972	0	1
GCA_000646395.1	VET1849R	95.981	0	0	0	0	0	0	0	0	0	0	0	0	99.792	0	100	0	99.972	0	1
GCA_000646415.1	VET1850R	95.745	0	0	0	0	0	0	0	0	0	0	0	0	99.792	0	100	0	99.972	0	1
GCA_000646435.1	VET1851R	97.991	0	0	0	0	0	0	0	0	0	0	0	0	99.792	100	100	0	99.958	0	2
GCA_000646455.1	VET1852R	95.981	0	0	0	0	0	99.048	0	0	0	0	0	0	99.792	0	100	0	99.978	0	2
GCA_000646475.1	VET1853R	95.981	100	0	0	0	0	0	0	0	0	0	0	0	99.792	97.358	100	0	99.972	0	3
GCA_000646495.1	VET1854R	95.981	100	0	0	0	0	0	0	0	0	0	0	0	99.792	97.358	100	0	99.972	0	3
GCA_000646515.1	VET1855R	95.981	100	0	0	0	0	0	0	0	0	0	0	0	99.792	97.358	100	0	99.967	0	3
GCA_000646535.1	VET1856R	95.981	100	0	0	0	0	0	0	0	0	0	0	0	99.792	97.358	100	0	99.967	0	3
GCA_000646555.1	VET1859R	97.991	100	0	0	0	0	99.873	0	0	0	0	0	0	99.792	100	100	0	99.983	0	4
GCA_000646575.1	VET1860R	95.981	0	0	0	0	0	0	0	0	0	0	0	0	99.792	0	100	0	99.967	0	1
GCA_000646595.1	VET1861R	95.981	0	0	0	0	0	0	0	0	0	0	0	0	99.792	0	100	0	99.967	0	1
GCA_000646615.1	VET1865R	99.95	0	0	0	0	0	0	0	0	0	0	0	0	99.792	97.358	100	0	99.972	0	2
GCA_000646635.1	VET1866R	98.345	0	0	0	0	0	0	0	0	0	0	0	0	99.792	0	100	0	99.983	0	1
GCA_000646655.1	VET1867R	98.345	0	0	0	0	0	0	0	0	0	0	0	0	99.792	0	100	0	99.983	0	1
GCA_000646675.1	VET1868R	95.981	100	0	0	0	0	0	0	0	0	0	0	0	99.792	97.358	100	0	99.972	0	3
GCA_000646695.1	VET1871R	95.981	100	0	0	0	0	0	0	0	0	0	0	0	99.792	97.358	100	0	99.972	0	3
GCA_000646715.1	VET1872R	95.981	100	0	0	0	0	0	0	0	0	0	0	0	99.792	97.358	100	0	99.972	0	3
GCA_000646735.1	VET1873R	95.981	99.869	0	0	0	0	99.728	0	0	0	0	0	0	99.792	0	100	0	99.972	0	3
GCA_000646755.1	VET1875R	95.981	99.869	0	0	0	0	99.728	0	0	0	0	0	0	99.792	97.358	100	0	99.972	0	4
GCA_000646775.1	VET1877R	98.463	100	0	0	0	0	100	0	0	0	0	0	0	99.792	100	100	0	99.834	0	4
GCA_000646795.1	VET1880R	97.991	0	0	0	0	0	99.873	0	0	0	0	0	0	99.792	0	100	0	99.983	0	2
GCA_000646815.1	VET1884R	95.981	100	0	0	0	0	0	0	0	0	0	0	0	99.792	97.358	100	0	99.95	0	3
GCA_000646835.1	VET1886R	95.981	0	0	0	0	0	0	0	0	0	0	0	0	99.792	0	100	0	99.972	0	1
GCA_000646855.1	VET1890R	95.981	0	0	0	0	0	99.048	0	0	0	0	0	0	99.792	0	99.799	0	99.972	0	2
GCA_000646875.1	VET1892R	95.981	100	0	0	0	0	99.048	0	0	0	0	0	0	99.792	97.358	100	0	99.972	0	4
GCA_000646895.1	VET1893R	97.991	100	0	0	0	0	99.876	0	0	0	0	0	0	99.792	100	100	0	99.978	0	4
GCA_000646915.1	VET1895R	95.981	0	0	0	0	0	0	0	0	0	0	0	0	99.792	0	100	0	99.983	0	1
GCA_000646935.1	VET1897R	95.981	0	0	0	0	0	0	0	0	0	0	0	0	99.74	0	100	0	99.972	0	1
GCA_000646955.1	VET1899R	95.981	100	0	0	0	0	0	0	0	0	0	0	0	99.792	97.358	100	0	99.972	0	3
GCA_000646975.1	VET1901R	97.991	0	0	0	0	0	0	0	0	0	0	0	0	99.792	100	100	0	99.978	0	2
GCA_000646995.1	VET1904R	95.981	0	0	0	0	0	0	0	0	0	0	0	0	99.792	0	100	0	99.972	0	1
GCA_000647015.1	VET1905R	95.981	0	0	0	0	0	0	0	0	0	0	0	0	99.792	0	100	0	99.972	0	1
GCA_000647035.1	VET1906R	95.981	100	0	0	0	0	0	0	0	0	0	0	0	99.792	97.358	100	0	99.972	0	3
GCA_000647055.1	VET1908R	95.981	0	0	0	0	0	0	0	0	0	0	0	0	99.792	100	99.799	0	99.972	0	2
GCA_000647075.1	VET1909R	95.981	0	0	0	0	0	0	0	0	0	0	0	0	99.792	97.358	100	0	99.972	0	2
GCA_000647095.1	VET1911R	95.981	100	0	0	0	0	0	0	0	0	0	0	0	99.792	97.358	100	0	99.972	0	3
GCA_000647115.1	VET1912R	95.981	100	0	0	0	0	0	0	0	0	0	0	0	99.792	97.358	100	0	99.972	0	3
GCA_000647135.1	VET1913R	95.981	0	0	0	0	0	0	0	0	0	0	0	0	99.792	0	100	0	99.972	0	1
GCA_000647155.1	VET1914R	95.981	0	0	0	0	0	0	0	0	0	0	0	0	99.792	0	100	0	99.972	0	1
GCA_000647175.1	VET1917S	95.981	0	0	0	0	0	0	0	0	0	0	0	0	99.792	100	100	0	99.978	0	2
GCA_000647195.1	VET1923S	95.981	0	0	0	0	0	0	0	0	0	0	0	0	99.792	100	100	0	99.978	0	2
GCA_000647215.1	VET1949S	95.981	0	0	0	0	0	99.048	0	0	0	0	0	0	99.792	0	100	0	99.967	0	2
GCA_000647235.1	VET1950S	95.981	0	0	0	0	0	0	0	0	0	0	0	0	99.792	0	100	0	99.983	0	1
GCA_000647255.1	VET1956S	95.863	0	0	0	0	0	0	0	0	0	0	0	0	99.792	100	100	0	99.972	0	2
GCA_000647275.1	VET1959S	98.463	0	0	0	0	0	0	0	0	99.86	0	0	0	99.792	100	100	0	99.983	0	3
GCA_000647295.1	ZTA09/03576-8HST	95.981	0	0	0	0	0	0	0	0	0	0	0	0	99.792	97.358	100	0	99.972	0	2
GCA_000647355.1	ZTA10/00045-9HST	95.981	100	0	0	0	0	0	0	0	0	0	0	0	99.792	97.358	100	0	99.972	0	3
GCA_000647375.1	ZTA10/00047-8HST	95.981	100	0	0	0	0	0	0	0	0	0	0	0	99.792	97.358	100	0	99.972	0	3
GCA_000647395.1	ZTA10/00058-8HST	95.981	100	0	0	0	0	0	0	0	0	0	0	0	99.792	97.358	100	0	99.972	0	3
GCA_000647415.1	ZTA10/02412-8HSA	95.981	99.647	0	0	0	0	0	0	0	0	0	0	0	99.792	0	100	0	99.983	0	2
GCA_000647435.1	ZTA11/00189-8HSA	95.863	99.647	0	0	0	0	0	0	0	0	0	0	0	99.792	0	100	0	99.983	0	2
GCA_002273395.1	ISU 912	98.463	97.113	0	0	0	0	100	0	0	0	0	0	0	99.792	0	100	0	99.972	0	3
GCA_002273415.1	ISU 913	98.463	100	0	0	0	0	100	0	0	0	0	0	0	99.792	0	100	0	99.972	0	3
GCA_002273455.1	ISU 916	98.427	99.606	0	0	0	0	100	0	0	0	0	0	0	99.792	0	100	0	99.969	0	3
GCA_002273475.1	ISU 917	98.463	96.719	0	0	0	0	100	0	0	0	0	0	0	99.792	0	100	0	0	0	3
GCA_002273495.1	ISU 918	98.463	100	0	0	0	0	100	0	0	0	0	0	0	99.792	0	100	0	0	0	3
GCA_002273525.1	ISU 920	98.463	100	0	0	0	0	100	0	0	0	0	0	0	100	0	100	0	0	0	3
GCA_002273535.1	ISU 919	99.9	98.031	0	0	0	0	100	0	0	0	0	0	0	99.792	0	100	0	0	0	3
GCA_002273545.1	ISU 924	98.463	100	0	0	0	0	100	0	0	0	0	0	0	99.792	0	100	0	99.967	0	3
GCA_002275185.1	ISU 914	99.9	100	0	0	0	0	100	0	0	0	0	0	0	99.792	0	100	0	99.972	0	3
GCA_002275205.1	ISU 922	98.463	100	0	0	0	0	100	0	0	0	0	0	0	99.792	0	100	0	99.972	0	3
GCA_002275225.1	ISU 925	98.463	100	0	0	0	0	100	0	0	0	0	0	0	99.792	0	100	0	99.972	0	3
GCA_002275265.1	ISU 927	98.463	100	0	0	0	0	100	0	0	0	0	0	0	99.792	0	100	0	0	0	3
GCA_002304635.1	ISU 909	98.463	100	0	0	0	0	100	0	0	0	0	0	0	99.792	0	100	0	0	0	3
GCA_000401595.1	112808A	95.981	0	0	0	0	0	0	0	0	0	0	0	0	99.792	0	100	0	0	0	1
GCA_000443245.1	S130	97.991	100	0	0	0	0	95.238	0	0	0	0	0	0	99.792	0	100	0	99.993	0	3
GCA_000443265.1	S123	95.981	99.647	0	0	0	0	99.593	0	0	0	0	0	0	99.792	0	100	0	99.983	0	3
GCA_000455725.2	S1	95.981	0	0	0	0	0	99.048	0	0	0	0	0	0	99.792	0	100	0	99.972	0	2
GCA_000530215.1	S0460	95.981	0	0	0	0	0	0	0	0	0	0	0	0	99.731	97.358	100	0	0	0	2
GCA_000577675.1	S0462	95.981	0	0	0	0	0	0	0	0	0	0	0	0	99.792	97.358	100	0	99.961	0	2
GCA_000682795.1	ZTA11/03130-3ST	95.981	0	0	0	0	0	98.971	0	0	0	0	0	0	99.792	97.358	100	0	99.972	0	3
GCA_000682835.1	ZTA09/03576-9HST	95.981	0	0	0	0	0	0	0	0	0	0	0	0	99.792	97.358	100	0	99.972	0	2
GCA_000682855.1	VET1918S	95.863	0	0	0	0	0	0	0	0	0	0	0	0	99.792	0	100	0	99.972	0	1
GCA_000682875.1	VET1915R	95.863	0	0	0	0	0	0	0	0	0	0	0	0	99.792	0	100	0	99.972	0	1
GCA_000682895.1	VET1910R	95.981	99.647	0	0	0	0	98.912	0	0	0	0	0	0	99.792	97.358	100	0	99.972	0	4
GCA_000683075.1	VET1515S	95.863	100	0	0	0	0	99.59	0	0	0	0	0	0	99.792	0	100	0	99.972	0	3
GCA_000682935.1	VET1898R	95.981	100	0	0	0	0	0	0	0	0	0	0	0	99.792	97.358	100	0	99.972	0	3
GCA_000682955.1	VET1896R	95.981	0	0	0	0	0	0	0	0	0	0	0	0	99.74	0	100	0	99.978	0	1
GCA_000682975.1	VET1876R	95.981	0	0	0	0	0	0	0	0	0	0	0	0	99.792	100	100	0	99.983	0	2
GCA_000682995.1	VET1869R	95.981	100	0	0	0	0	0	0	0	0	0	0	0	99.792	97.358	100	0	99.972	0	3
GCA_000683015.1	VET1858R	97.991	100	0	0	0	0	98.912	0	0	0	0	0	0	99.792	100	100	0	99.983	0	4
GCA_000683035.1	VET1842R	95.981	100	0	0	0	0	0	0	0	0	0	0	0	99.792	97.358	100	0	99.972	0	3
GCA_000683055.1	VET1833R	95.981	100	0	0	0	0	0	0	0	0	0	0	0	99.792	100	100	0	99.972	0	3
GCA_000683095.1	VET1422S	98.463	100	0	0	0	0	99.048	0	0	99.86	0	0	0	99.792	100	100	0	99.983	0	5
GCA_000683115.1	VET1419S	95.981	99.529	0	0	0	0	0	0	0	0	0	0	0	99.74	0	99.799	0	99.967	0	2
GCA_000683175.1	VET1103S	98.463	100	0	0	0	0	100	0	0	0	0	0	0	99.792	100	100	0	99.983	0	4
GCA_000683195.1	VET0798S	95.981	0	0	0	0	0	0	0	0	0	0	0	0	99.792	100	100	0	99.967	0	2
GCA_000683215.1	VET0765S	98.463	0	0	0	0	0	0	0	0	99.86	0	0	0	99.792	100	100	0	99.983	0	3
GCA_000683235.1	VET0612S	95.981	0	0	0	0	0	0	0	0	0	0	0	0	99.792	0	100	0	99.972	0	1
GCA_000683255.1	VET0489R	95.981	0	0	0	0	0	99.048	0	0	0	0	0	0	99.792	100	100	0	99.983	0	3
GCA_000683275.1	VET0473R	95.981	0	0	0	0	0	0	0	0	0	0	0	0	99.792	100	100	0	99.983	0	2
GCA_000683295.1	VET0472R	95.981	99.647	0	0	0	0	99.048	0	0	0	0	0	0	99.792	0	100	0	99.972	0	3
GCA_000683315.1	VET0471R	95.981	0	0	0	0	0	0	0	0	0	0	0	0	99.792	100	100	0	99.983	0	2
GCA_000683335.1	VET0469R	95.981	0	0	0	0	0	0	0	0	0	0	0	0	99.792	0	100	0	99.983	0	1
GCA_000683355.1	VET0467R	95.981	0	0	0	0	0	0	0	0	0	0	0	0	99.792	0	100	0	99.978	0	1
GCA_000683375.1	VET0437R	95.981	0	0	0	0	0	0	0	0	0	0	0	0	99.792	0	100	0	99.983	0	1
GCA_000683395.1	VET0436R	95.981	99.869	0	0	0	0	100	0	0	0	0	0	0	99.792	0	100	0	99.972	0	3
GCA_000683415.1	VET0426R	95.981	0	0	0	0	0	0	0	0	0	0	0	0	99.792	0	100	0	99.983	0	1
GCA_000683435.1	VET0424R	95.981	0	0	0	0	0	0	0	0	0	0	0	0	99.792	0	99.799	0	99.972	0	1
GCA_000683455.1	VET0422R	95.981	0	0	0	0	0	0	0	0	0	0	0	0	99.792	0	99.799	0	99.972	0	1
GCA_000683475.1	VET0414R	98.345	99.529	0	0	0	0	99.048	0	0	0	0	0	0	99.792	0	100	0	99.983	0	3
GCA_000683495.1	VET0400R	95.981	0	0	0	0	0	99.048	0	0	0	0	0	0	99.792	0	100	0	99.983	0	2
GCA_000683515.1	VET0368R	95.981	0	0	0	0	0	0	0	0	0	0	0	0	99.792	100	100	0	99.983	0	2
GCA_000683535.1	VET0361R	95.981	0	0	0	0	0	0	0	0	0	0	0	0	99.792	0	100	0	99.978	0	1
GCA_000683555.1	VET0358R	96.927	0	0	0	0	0	0	0	0	0	0	0	0	99.792	100	100	0	99.978	0	2
GCA_000683575.1	VET0353R	95.981	0	0	0	0	0	0	0	0	0	0	0	0	99.792	0	100	0	99.967	0	1
GCA_000683595.1	VET0343R	95.981	0	0	0	0	0	0	0	0	0	0	0	0	99.792	0	100	0	99.983	0	1
GCA_000683615.1	VET0342R	95.981	100	0	0	0	0	0	0	0	0	0	0	0	99.74	100	100	0	99.978	0	3
GCA_000683635.1	VET0332R	95.981	0	0	0	0	0	0	0	0	0	0	0	0	99.792	0	100	0	99.983	0	1
GCA_000683655.1	VET0319R	95.981	0	0	0	0	0	99.873	0	0	0	0	0	0	99.792	0	100	0	99.983	0	2
GCA_000683675.1	VET0306R	95.981	99.869	0	0	0	0	99.728	0	0	0	0	0	0	99.792	97.358	100	0	99.972	0	4
GCA_000683695.1	VET0301R	95.981	0	0	0	0	0	0	0	0	0	0	0	0	99.792	0	100	0	99.983	0	1
GCA_000683715.1	VET0298R	95.863	0	0	0	0	0	0	0	0	0	0	0	0	99.792	0	100	0	99.972	0	1
GCA_000683735.1	VET0293R	95.863	0	0	0	0	0	0	0	0	0	0	0	0	99.792	0	100	0	99.967	0	1
GCA_000683755.1	VET0251R	95.981	0	0	0	0	0	99.048	0	0	0	0	0	0	99.792	0	100	0	99.978	0	2
GCA_000683775.1	VET0244R	95.981	0	0	0	0	0	99.048	0	0	0	0	0	0	99.792	0	100	0	99.983	0	2
GCA_000683795.1	VET0235R	95.981	0	0	0	0	0	0	0	0	0	0	0	0	99.792	0	100	0	99.972	0	1
GCA_000683815.1	VET0232R	95.981	99.529	0	0	0	0	0	0	0	0	0	0	0	99.792	0	100	0	99.983	0	2
GCA_000683835.1	VET0229R	95.981	0	0	0	0	0	0	0	0	0	0	0	0	99.792	0	100	0	99.972	0	1
GCA_000683855.1	VET0219R	95.981	99.869	0	0	0	0	99.728	0	0	0	0	0	0	99.792	97.358	100	0	99.972	0	4
GCA_000683875.1	VET0203R	95.981	0	0	0	0	0	0	0	0	0	0	0	0	99.792	0	100	0	99.972	0	1
GCA_000683895.1	VET0197R	95.981	0	0	0	0	0	0	0	0	0	0	0	0	99.792	0	100	0	99.972	0	1
GCA_000683915.1	VET0191R	95.981	0	0	0	0	0	99.746	0	0	0	0	0	0	99.792	0	100	0	99.978	0	2
GCA_000683935.1	VET0184R	95.981	99.78	0	0	0	0	100	0	0	0	0	0	0	94.023	0	100	0	99.983	0	3
GCA_000683955.1	VET0183R	95.981	99.78	0	0	0	0	100	0	0	0	0	0	0	94.023	0	100	0	99.983	0	3
GCA_000683975.1	VET0159R	95.863	100	0	0	0	0	99.59	0	0	0	0	0	0	99.792	0	100	0	99.972	0	3
GCA_000683995.1	VET0158R	95.981	0	0	0	0	0	0	0	0	0	0	0	0	99.792	0	100	0	99.978	0	1
GCA_000684015.1	VET0157R	95.981	0	0	0	0	0	99.048	0	0	0	0	0	0	99.792	0	99.799	0	99.967	0	2
GCA_000684035.1	VET0154R	95.981	0	0	0	0	0	0	0	0	0	0	0	0	99.792	0	100	0	99.972	0	1
GCA_000684055.1	VET0150R	95.981	0	0	0	0	0	99.048	0	0	0	0	0	0	99.792	0	100	0	99.978	0	2
GCA_000684075.1	VET0141R	95.981	0	0	0	0	0	99.048	0	0	0	0	0	0	99.792	0	100	0	99.978	0	2
GCA_000684095.1	VET0136R	95.981	100	0	0	0	0	99.048	0	0	0	0	0	0	99.792	97.358	100	0	99.972	0	4
GCA_000684115.1	VET0125R	95.981	99.869	0	0	0	0	99.037	0	0	0	0	0	0	99.792	97.358	100	0	99.972	0	4
GCA_000684135.1	VET0120R	95.981	0	0	0	0	0	99.048	0	0	0	0	0	0	99.792	0	100	0	99.983	0	2
GCA_000684155.1	VET0113R	95.981	0	0	0	0	0	99.81	0	0	0	0	0	0	99.792	100	100	0	99.983	0	3
GCA_000684175.1	VET0111R	95.981	99.529	0	0	0	0	0	0	0	0	0	0	0	99.792	0	100	0	99.983	0	2
GCA_000684195.1	VET0102R	95.981	0	0	0	0	0	0	0	0	0	0	0	0	99.792	0	100	0	99.983	0	1
GCA_000684215.1	VET0081R	95.981	0	0	0	0	0	0	0	0	0	0	0	0	99.792	0	100	0	99.983	0	1
GCA_000684235.1	VET0078R	95.981	99.78	0	0	0	0	100	0	0	0	0	0	0	94.023	0	100	0	99.978	0	3
GCA_000684255.1	VET0058R	95.981	0	0	0	0	0	0	0	0	0	0	0	0	99.792	0	100	0	99.972	0	1
GCA_000684275.1	VET0050R	95.981	99.529	0	0	0	0	0	0	0	0	0	0	0	99.792	0	99.799	0	99.972	0	2
GCA_000684295.1	VE08/02242ST1	95.981	0	0	0	0	0	99.873	0	0	0	0	0	0	99.792	0	100	0	99.983	0	2
GCA_000684315.1	USA_6	95.981	0	0	0	0	0	0	0	0	0	0	0	0	99.792	0	100	0	99.983	0	1
GCA_000684335.1	Tur-5	95.981	99.869	0	0	0	0	99.713	0	0	0	0	0	0	99.792	97.358	100	0	99.972	0	4
GCA_000684355.1	Tur-4	95.981	100	0	0	0	0	99.728	0	0	0	0	0	0	99.792	97.358	100	0	99.967	0	4
GCA_000684375.1	S64_POEL	95.981	99.869	0	0	0	0	99.728	0	0	0	0	0	0	99.792	97.358	100	0	99.972	0	4
GCA_000684395.1	S63_POEL	95.981	0	0	0	0	0	99.048	0	0	100	0	0	0	99.792	0	100	0	99.972	0	3
GCA_000684415.1	Rd.290	95.981	0	0	0	0	0	0	0	0	0	0	0	0	99.792	0	100	0	99.972	0	1
GCA_000684435.1	MSSA-47	98.463	100	0	0	0	0	100	0	0	0	0	0	0	99.792	0	100	0	99.972	0	3
GCA_000684455.1	MSSA-37	99.409	0	0	0	0	0	0	0	0	0	0	0	0	99.792	0	100	0	99.972	0	1
GCA_000684475.1	MSSA-123	97.991	0	0	0	0	0	0	0	0	0	0	0	0	99.792	0	100	0	99.983	0	1
GCA_000684495.1	GD2010-169	95.981	99.869	0	0	0	0	99.728	0	0	0	0	0	0	99.792	97.358	100	0	99.967	0	4
GCA_000684515.1	GD2010-159	95.981	0	0	0	0	0	0	0	0	0	0	0	0	99.792	0	100	0	99.972	0	1
GCA_000684535.1	C3452	95.981	0	0	0	0	0	0	0	0	0	0	0	0	99.792	0	100	0	99.961	0	1
GCA_000684595.1	81629	97.991	0	0	0	0	0	99.81	0	0	0	0	0	0	99.792	0	100	0	99.983	0	2
GCA_000684615.1	63-D10	97.991	0	0	0	0	0	99.81	0	0	0	0	0	0	99.792	0	100	0	99.983	0	2
GCA_000684635.1	53180-1	97.991	0	0	0	0	0	0	0	0	0	0	0	0	99.792	0	100	0	99.983	0	1
GCA_000684655.1	45(2607)	98.463	100	0	0	0	0	100	0	0	0	0	0	0	99.792	100	100	0	99.978	0	4
GCA_000684675.1	28(3K2-5)	95.981	99.93	0	0	0	0	0	0	0	0	0	0	0	99.792	97.358	100	0	99.972	0	3
GCA_000684695.1	22(2K81-5)	95.981	99.869	0	0	0	0	99.873	0	0	0	0	0	0	99.792	100	100	0	99.972	0	4
GCA_000684715.1	2011-60-2275-7	98.463	100	0	0	0	0	100	0	0	0	0	0	0	99.792	100	100	0	99.978	0	4
GCA_000684735.1	1484-9	97.991	0	0	0	0	0	0	0	0	99.86	0	0	0	99.792	0	100	0	99.978	0	2
GCA_000684795.1	1111001578	97.991	100	0	0	0	0	99.876	0	0	0	0	0	0	99.792	0	100	0	99.983	0	3
GCA_000684815.1	10S00488	97.991	0	0	0	0	0	99.81	0	0	0	0	0	0	99.792	0	100	0	99.983	0	2
GCA_000684835.1	1(04GN_04-02-52-07)	95.981	0	0	0	0	0	0	0	0	0	0	0	0	99.792	0	100	0	99.967	0	1
GCA_000684855.1	09S01694	97.991	0	0	0	0	0	99.746	0	0	0	0	0	0	99.792	0	100	0	99.978	0	2
GCA_000684875.1	09-00736	97.991	0	0	0	0	0	99.873	0	0	0	0	0	0	99.792	0	100	0	99.983	0	2
GCA_000684895.1	08-01229	97.991	99.647	0	0	0	0	99.873	0	0	0	0	0	0	99.792	0	100	0	99.983	0	3
GCA_000684915.1	08-01062	97.991	99.647	0	0	0	0	99.873	0	0	0	0	0	0	99.792	0	100	0	99.983	0	3
GCA_000684955.1	08-01059	97.991	0	0	0	0	0	99.873	0	0	0	0	0	0	99.792	0	100	0	99.983	0	2
GCA_000827155.1	K12PJN53	95.981	100	0	0	0	0	100	0	0	99.72	0	0	0	99.792	0	100	0	0	0	4
GCA_002208515.1	SA33972	95.981	0	0	0	0	0	99.864	0	0	0	0	0	0	99.792	97.358	100	0	99.972	0	3
GCA_001455935.1	KS101Sa	98.463	100	0	0	0	0	99.048	0	0	99.93	0	0	0	99.792	100	100	0	0	0	5
GCA_001455955.1	SA7112	95.745	0	0	0	0	0	0	0	0	99.79	0	0	0	99.792	0	100	0	99.978	0	2
GCA_001940425.1	55488	95.981	99.647	0	0	0	0	0	0	0	0	0	0	0	99.792	100	100	0	99.983	0	3
GCA_002097015.1	516	0	0	0	0	0	0	99.048	0	0	0	0	0	0	99.792	97.358	100	0	0	0	3
GCA_002099175.1	Sa52	95.981	94.238	0	0	0	0	99.864	0	0	0	0	0	0	99.792	0	100	0	99.972	0	3
GCA_002204735.1	S681	98.463	100	0	0	0	0	100	0	0	0	0	0	0	99.792	100	100	0	99.983	0	4
GCA_002208345.1	SA33924	99.409	0	0	0	0	0	0	0	0	0	0	0	0	99.792	0	100	0	99.983	0	1
GCA_002208415.1	SA10-17	97.991	0	0	0	0	0	99.81	0	0	0	0	0	0	99.792	0	100	0	99.983	0	2
GCA_002208475.1	SA14-265	98.463	100	0	0	0	0	100	0	0	0	0	0	0	99.792	0	100	0	99.978	0	3
GCA_002935015.1	PR243B0	99.851	0	0	0	0	0	99.342	0	0	0	0	0	0	99.792	0	100	0	99.972	0	2
GCA_003001175.1	IMT33368	95.981	100	0	0	0	0	0	0	0	0	0	0	0	99.792	97.358	100	0	99.972	0	3
GCA_003001185.1	IMT33828	95.981	100	0	0	0	0	0	0	0	0	0	0	0	99.792	97.358	100	0	99.972	0	3
GCA_003001215.1	IMT33391	95.981	100	0	0	0	0	0	0	0	0	0	0	0	99.792	97.358	100	0	99.972	0	3
GCA_003001225.1	IMT33861	95.981	100	0	0	0	0	0	0	0	0	0	0	0	99.792	97.358	100	0	99.972	0	3
GCA_003001255.1	IMT33862	95.981	100	0	0	0	0	0	0	0	0	0	0	0	99.792	97.358	100	0	99.972	0	3
GCA_003001275.1	IMT33826	95.981	100	0	0	0	0	0	0	0	0	0	0	0	99.792	97.358	100	0	99.972	0	3
GCA_003001345.1	IMT36995	95.981	100	0	0	0	0	0	0	0	0	0	0	0	99.792	97.358	100	0	99.972	0	3
GCA_003001395.1	IMT37277	95.981	100	0	0	0	0	0	0	0	0	0	0	0	99.792	97.358	100	0	99.972	0	3
GCA_003001475.1	IMT34426	95.981	100	0	0	0	0	0	0	0	0	0	0	0	99.792	97.358	100	0	99.972	0	3
GCA_003001485.1	IMT37264	95.981	100	0	0	0	0	0	0	0	0	0	0	0	99.792	97.358	100	0	99.972	0	3
GCA_003237125.1	CM147	97.991	0	0	0	0	0	99.873	0	0	0	0	0	0	99.792	0	100	0	99.983	0	2
GCA_003238765.1	CM34	95.981	99.869	0	0	0	0	99.728	0	0	99.72	0	0	0	99.688	0	100	0	99.956	0	4
GCA_003240135.1	CM46	95.981	99.859	0	0	0	0	99.728	0	0	99.72	0	0	0	99.792	0	100	0	99.972	0	4
GCA_003327835.1	IMT38887	95.981	99.647	0	0	0	0	0	0	0	0	0	0	0	99.792	0	100	0	99.961	0	2
GCA_003327885.1	IMT38888	95.981	100	0	0	0	0	0	0	0	0	0	0	0	99.792	97.358	100	0	99.967	0	3
GCA_003328005.1	IMT27969	95.981	100	0	0	0	0	0	0	0	0	0	0	0	99.792	97.358	100	0	99.972	0	3
GCA_003328335.1	IMT38422	95.981	100	0	0	0	0	0	0	0	0	0	0	0	99.792	97.358	100	0	99.972	0	3
GCA_003328355.1	IMT38358	95.981	100	0	0	0	0	0	0	0	0	0	0	0	99.792	97.358	100	0	99.972	0	3
GCA_003328375.1	IMT38431	95.981	100	0	0	0	0	0	0	0	0	0	0	0	99.792	97.358	100	0	99.972	0	3
GCA_003328385.1	IMT38587	95.981	100	0	0	0	0	0	0	0	0	0	0	0	99.792	97.358	100	0	99.972	0	3
GCA_003328395.1	IMT38594	95.981	100	0	0	0	0	0	0	0	0	0	0	0	99.792	97.358	100	0	99.972	0	3
GCA_003328405.1	IMT38653	95.981	100	0	0	0	0	0	0	0	0	0	0	0	99.792	97.358	100	0	99.972	0	3
GCA_003353135.1	MI18-33	95.863	0	0	0	0	0	93.443	0	0	0	0	0	0	99.792	0	100	0	99.961	0	2
GCA_003353145.1	MI18-34	95.863	0	0	0	0	0	93.443	0	0	0	0	0	0	99.792	0	100	0	99.961	0	2
GCA_003353195.1	MI18-37	95.863	0	0	0	0	0	93.443	0	0	0	0	0	0	99.792	0	100	0	99.961	0	2
GCA_003353235.1	MI18-1974	95.863	0	0	0	0	0	93.443	0	0	0	0	0	0	99.792	0	100	0	99.961	0	2
GCA_003353265.1	MI18-935	95.863	0	0	0	0	0	93.443	0	0	0	0	0	0	99.792	0	100	0	99.961	0	2
GCA_003581515.1	SAV987	99.9	0	0	0	0	0	99.048	0	0	0	0	0	0	99.792	0	100	0	99.978	0	2
GCA_003581545.1	SAV154	97.991	0	0	0	0	0	0	0	0	99.86	0	0	0	99.792	0	100	0	99.983	0	2
GCA_003583795.1	SAV1146	99.409	0	0	0	0	0	99.81	0	0	0	0	0	0	99.792	0	100	0	99.983	0	2
GCA_003583815.1	SAV1109	99.409	99.647	0	0	0	0	99.048	0	0	97.685	0	0	0	99.792	0	100	0	99.978	0	4
GCA_003605315.1	Sau-3221Lar	99.946	100	0	0	0	0	100	0	0	0	0	0	0	99.792	100	100	0	99.983	0	4
GCA_900088495.1	pig swab	98.463	94.238	0	0	0	0	99.864	0	0	0	0	0	0	99.792	100	100	0	99.972	0	4
GCA_900088505.1	pig swab	98.463	94.238	0	0	0	0	99.864	0	0	0	0	0	0	99.792	100	100	0	99.972	0	4
GCA_900409475.1	11_LA_290	98.345	100	0	0	0	0	99.863	0	0	0	0	0	0	99.792	100	100	0	99.983	0	4
GCA_001726145.1	MRSA 10152	97.991	100	0	0	0	0	98.776	0	0	0	0	0	0	99.792	100	100	0	99.967	0	4
GCA_002934925.1	PN243B0	95.981	0	0	0	0	0	99.593	0	0	0	0	0	0	99.792	0	100	0	99.972	0	2
GCA_002934945.1	PN235B0	99.851	0	0	0	0	0	99.395	0	0	0	0	0	0	99.792	0	100	0	99.972	0	2
GCA_002935045.1	PN246B0	99.851	0	0	0	0	0	99.593	0	0	0	0	0	0	99.792	0	100	0	99.978	0	2
GCA_003001295.1	IMT33997	95.981	100	0	0	0	0	0	0	0	0	0	0	0	99.792	97.358	100	0	99.972	0	3
GCA_003001315.1	IMT34080	95.981	100	0	0	0	0	0	0	0	0	0	0	0	99.792	97.358	100	0	99.972	0	3
GCA_003001335.1	IMT34209	95.981	100	0	0	0	0	0	0	0	0	0	0	0	99.792	97.358	100	0	99.972	0	3
GCA_003001375.1	IMT37082	95.981	100	0	0	0	0	0	0	0	0	0	0	0	99.792	97.358	100	0	99.972	0	3
GCA_003001415.1	IMT37340	95.981	100	0	0	0	0	0	0	0	0	0	0	0	99.792	97.358	100	0	99.972	0	3
GCA_003001435.1	IMT37325	95.981	100	0	0	0	0	0	0	0	0	0	0	0	99.792	97.358	100	0	99.972	0	3
GCA_003001455.1	IMT37510	95.981	100	0	0	0	0	0	0	0	0	0	0	0	99.792	97.358	100	0	99.972	0	3
GCA_003057555.1	IMT37426	95.981	100	0	0	0	0	0	0	0	0	0	0	0	99.792	97.358	100	0	99.972	0	3
GCA_003309355.1	S2CY27	98.463	99.764	0	0	0	0	93.21	0	0	0	0	0	0	99.792	0	100	0	99.978	0	3
GCA_003309445.1	S2AY23	98.463	0	0	0	0	0	94.286	0	0	0	0	0	0	99.792	0	100	0	99.978	0	2
GCA_003309865.1	SDY30	98.463	100	0	0	0	0	99.728	0	0	99.79	0	0	0	99.792	100	99.799	0	99.967	0	5
GCA_003309885.1	SDY10	95.981	99.78	0	0	0	0	99.864	0	0	99.72	0	0	0	99.792	0	100	0	99.978	0	4
GCA_003327875.1	IMT38884	95.981	100	0	0	0	0	100	0	0	0	0	0	0	99.792	0	100	0	99.967	0	3
GCA_003327935.1	IMT38951_SK41	97.991	100	0	0	0	0	99.876	0	0	99.79	0	0	0	99.792	100	100	0	99.967	0	5
GCA_003327955.1	IMT38886	95.981	0	0	0	0	0	0	0	0	0	0	0	0	99.792	0	100	0	99.983	0	1
GCA_003327965.1	IMT38885	95.981	0	0	0	0	0	0	0	0	0	0	0	0	99.792	0	100	0	99.972	0	1
GCA_003327995.1	IMT38951_SK42	97.991	100	0	0	0	0	99.876	0	0	99.79	0	0	0	99.792	100	100	0	99.967	0	5
GCA_004011165.1	PKFA-151	95.863	0	0	0	0	0	0	0	0	99.79	0	0	0	99.792	0	99.799	0	99.972	0	2
GCA_004012035.1	PJFH-522M	98.463	100	0	0	0	0	99.728	0	0	99.93	0	0	0	99.792	100	99.799	0	99.967	0	5
GCA_004681195.1	PJFA-521M	98.463	100	0	0	0	0	99.728	0	100	99.65	0	0	0	99.792	100	99.799	0	99.967	0	6
GCA_900088515.1	pig swab	98.463	94.238	0	0	0	0	99.864	0	0	0	0	0	0	99.792	100	100	0	99.972	0	4
GCA_900250545.1	H1665	97.991	0	0	0	0	0	99.81	0	0	0	0	0	0	99.792	0	100	0	99.983	0	2
GCA_900250695.1	H1781	98.463	94.238	0	0	0	0	99.876	0	0	0	0	0	0	99.792	100	100	0	99.967	0	4
GCA_900250715.1	H1832	98.463	94.238	0	0	0	0	99.876	0	0	0	0	0	0	99.792	100	100	0	99.972	0	4
GCA_900250965.1	M2900	98.463	100	0	0	0	0	100	0	0	0	0	0	0	99.792	100	100	0	99.978	0	4
GCA_900251395.1	M3450	98.528	94.238	0	0	0	0	99.876	0	0	0	0	0	0	99.792	100	100	0	99.972	0	4
GCA_900251735.1	M3784	98.463	94.238	0	0	0	0	99.876	0	0	0	0	0	0	99.792	100	100	0	99.976	0	4
GCA_900251815.1	M3897	98.463	94.238	0	0	0	0	99.048	0	0	0	0	0	0	99.792	100	100	0	99.972	0	4
GCA_900251835.1	M3883	98.463	100	0	0	0	0	100	0	0	0	0	0	0	99.792	100	100	0	99.983	0	4
GCA_900251945.1	M3907	98.463	100	0	0	0	0	100	0	0	0	0	0	0	99.74	100	100	0	99.967	0	4
GCA_900252185.1	RH207	95.981	0	0	0	0	0	0	0	0	0	0	0	0	99.792	0	100	0	99.972	0	1
GCA_900474725.1	NCTC13140	99.851	99.78	0	0	99.218	0	0	0	0	0	0	0	0	100	0	100	0	99.911	0	3
GCA_900482605.1	EOE015	98.463	100	0	0	99.218	0	99.863	0	0	0	0	0	0	100	0	100	0	99.911	0	4
GCA_900457445.1	NCTC13133	97.991	99.78	0	0	0	0	100	0	0	0	0	0	0	100	0	100	0	99.917	0	3
GCA_900457485.1	NCTC13139	97.991	100	0	0	99.218	0	99.863	0	0	0	0	0	0	100	0	100	0	99.911	0	4
GCA_003354665.1	165	99.9	99.78	0	0	0	0	0	0	0	0	0	0	0	99.792	0	100	0	99.834	0	2
GCA_003354945.1	545	98.463	99.78	0	0	0	0	0	0	0	0	0	0	0	99.792	0	100	0	99.834	0	2
GCA_003354965.1	546	98.463	99.78	0	0	0	0	0	0	0	0	0	0	0	99.792	0	100	0	99.834	0	2
GCA_900458335.1	NCTC13141	0	99.78	0	0	0	0	0	0	0	0	0	0	0	100	0	100	0	99.911	0	2
GCA_003421725.1	M6K066	97.991	100	0	0	0	0	100	0	0	0	0	0	0	99.323	0	100	0	99.823	0	3

## Sheet: random 782 ardA negatives
Assembly	Strain	beta-lactam	aminoglycoside	colistin	fosfomycin	fusidicacid	glycopeptide	macrolide	nitroimidazole	oxazolidinone	phenicol	quinolone	rifampicin	sulphonamide	tetracycline	trimethoprim	ardA-H2	ardA-H1	Tn916	Tn5801	Resistance without bl
GCA_001019125.2	FDAARGOS_43	99.95	0	0	0	0	0	0	0	0	0	0	0	0	0	0	0	0	0	0	0
GCA_002209325.1	FORC_045	0	100	0	0	100	0	0	0	0	0	0	0	0	0	0	0	0	0	0	2
GCA_003957315.1	PMB 64-1	0	0	0	0	0	0	0	0	0	0	0	0	0	0	0	0	0	0	0	0
GCA_001275825.1	A1	0	0	0	0	100	0	0	0	0	0	0	0	0	0	0	0	0	0	0	1
GCA_000626855.1	CO-41	99.409	0	0	0	0	0	99.184	0	0	0	0	0	0	0	0	0	0	0	0	1
GCA_000626955.1	21304	99.409	0	0	0	99.844	0	0	0	0	0	0	0	0	0	0	0	0	0	0	1
GCA_000747275.1	327	99.409	0	0	0	100	0	0	0	0	0	0	0	0	0	0	0	0	0	0	1
GCA_001680935.1	Sa12-002	0	0	0	0	0	0	0	0	0	0	0	0	0	0	0	0	0	0	0	0
GCA_003237355.1	CM127	99.409	99.78	0	0	0	0	98.912	0	0	0	0	0	0	99.855	0	0	0	0	0	3
GCA_003240175.1	CM42	99.291	99.78	0	0	0	0	98.912	0	0	0	0	0	0	0	0	0	0	0	0	2
GCA_003336555.1	ch24	99.409	99.647	0	0	0	0	0	0	0	0	0	0	0	0	0	0	0	0	0	1		Supplementary File S2. Assessment of resistance-associated genes acquired by horizontal transfer in the genomes carrying ardA-H1, ardA-H2, and in those lacking these genes using ResFinder 3.0.
GCA_003423985.1	M1KS0176_2	99.409	100	0	0	0	0	98.912	0	0	0	0	0	0	0	0	0	0	0	0	2
GCA_003424305.1	M1KS0526_3	0	0	0	0	0	0	0	0	0	0	0	0	0	0	0	0	0	0	0	0
GCA_005047535.1	6 (A)	99.409	99.874	0	0	100	0	0	0	0	0	0	0	0	100	0	0	0	0	0	3
GCA_900128095.1	3688STDY6124950	99.409	0	0	0	0	0	0	0	0	0	0	0	0	0	0	0	0	0	0	0
GCA_900149245.1	tirS_MRSA1	99.9	100	0	0	100	0	98.958	0	0	0	0	0	0	0	0	0	0	0	0	3
GCA_001063885.1	169_SAUR	0	0	0	0	0	0	0	0	0	0	0	0	0	0	0	0	0	0	0	0
GCA_001921665.1	LC33	99.409	99.874	0	0	0	0	0	0	0	0	0	0	0	0	0	0	0	0	0	1
GCA_003017755.1	0908-2002-2015	0	0	0	0	0	0	0	0	0	0	0	0	0	0	0	0	0	0	0	0
GCA_900097885.1	MSSAT94	0	0	0	0	0	0	0	0	0	0	0	0	0	0	100	0	0	0	0	1
GCA_900250665.1	H1688	99.409	99.874	0	0	100	0	0	0	0	0	0	0	0	100	0	0	0	0	0	3
GCA_000512505.1	MUF256	99.058	0	0	0	99.844	0	0	0	0	0	0	0	0	0	100	0	0	0	0	2
GCA_001019395.2	NRS484	0	0	0	0	0	0	0	0	0	0	0	0	0	0	0	0	0	0	0	0
GCA_003354725.1	143	98.345	0	0	0	0	0	0	0	0	0	0	0	0	0	0	0	0	0	0	0
GCA_900637155.1	NCTC13811	98.463	100	0	0	0	0	100	0	0	0	0	0	0	0	0	0	0	0	0	2
GCA_000160375.1	68-397	97.991	100	0	0	0	0	100	0	0	0	0	0	0	0	0	0	0	0	0	2
GCA_000160395.1	E1410	98.463	0	0	0	0	0	0	0	0	0	0	0	0	0	0	0	0	0	0	0
GCA_000162695.1	M899	98.463	0	0	0	0	0	0	0	0	0	0	0	0	100	0	0	0	0	0	1
GCA_000162715.1	WBG10049	98.463	0	0	0	0	0	0	0	0	0	0	0	0	0	0	0	0	0	0	0
GCA_000543045.1	KINW6056	99.9	100	0	0	0	0	100	0	0	0	0	0	0	0	0	0	0	0	0	2
GCA_000645515.1	VET0889S	98.463	0	0	0	0	0	0	0	0	0	0	0	0	0	0	0	0	0	0	0
GCA_000221845.2	21195	0	0	0	0	0	0	0	0	0	0	0	0	0	0	0	0	0	0	0	0
GCA_000242515.2	21264	98.463	0	0	0	0	0	0	0	0	0	0	0	0	0	0	0	0	0	0	0
GCA_000245615.2	21345	98.463	0	0	0	0	0	0	0	0	0	0	0	0	0	0	0	0	0	0	0
GCA_000401455.1	122051	98.463	0	0	0	0	0	0	0	0	0	0	0	0	0	0	0	0	0	0	0
GCA_000577595.1	S2397	99.291	0	0	0	0	0	0	0	0	0	0	0	0	0	0	0	0	0	0	0
GCA_000602045.1	T16600	0	0	0	0	0	0	0	0	0	0	0	0	0	0	0	0	0	0	0	0
GCA_000877915.1	SA-260	98.463	0	0	0	0	0	0	0	0	0	0	0	0	0	0	0	0	0	0	0
GCA_001062555.1	1264_SAUR	98.463	100	0	0	0	0	100	0	0	0	0	0	0	0	0	0	0	0	0	2
GCA_001411685.1	CC169	99.409	0	0	0	0	0	0	0	0	0	0	0	0	0	0	0	0	0	0	0
GCA_002268105.1	UA923	98.463	0	0	0	0	0	0	0	0	0	0	0	0	0	0	0	0	0	0	0
GCA_003038375.1	SAM-15	98.463	100	0	0	0	0	99.863	0	0	0	0	0	0	0	0	0	0	0	0	2
GCA_003263455.1	UAMS-1	98.463	0	0	0	0	0	0	0	0	0	0	0	0	0	0	0	0	0	0	0
GCA_003668675.1	ZH04	98.463	0	0	0	0	0	0	0	0	0	0	0	0	0	0	0	0	0	0	0
GCA_003720655.1	CFBR-309	95.626	0	0	0	0	0	99.456	0	0	0	0	0	0	98.438	0	0	0	0	0	2
GCA_003721005.1	BCH-SA-08	98.463	100	0	0	0	0	100	0	0	0	0	0	0	0	0	0	0	0	0	2
GCA_900017595.1	st1445	98.345	100	0	0	0	0	100	0	0	0	0	0	0	0	0	0	0	0	0	2
GCA_900017655.1	st2543	98.463	100	0	0	0	0	100	0	0	0	0	0	0	0	0	0	0	0	0	2
GCA_900018125.1	st1203	98.463	100	0	0	0	0	100	0	0	0	0	0	0	0	0	0	0	0	0	2
GCA_900018295.1	st1434	98.463	100	0	0	0	0	100	0	0	0	0	0	0	0	0	0	0	0	0	2
GCA_900020235.1	st1376	98.463	100	0	0	0	0	100	0	0	0	0	0	0	0	0	0	0	0	0	2
GCA_900033765.1	st847	98.463	100	0	0	0	0	100	0	0	0	0	0	0	0	0	0	0	0	0	2
GCA_900035845.1	st569	98.345	100	0	0	0	0	100	0	0	0	0	0	0	0	0	0	0	0	0	2
GCA_900037645.1	st762	98.463	100	0	0	0	0	100	0	0	0	0	0	0	0	0	0	0	0	0	2
GCA_900037715.1	st677	98.463	100	0	0	0	0	100	0	0	0	0	0	0	0	0	0	0	0	0	2
GCA_900038255.1	st232	99.95	100	0	0	0	0	100	0	0	0	0	0	0	0	0	0	0	0	0	2
GCA_900038375.1	st565	98.345	100	0	0	0	0	100	0	0	0	0	0	0	0	0	0	0	0	0	2
GCA_900039105.1	st1483	98.463	100	0	0	0	0	100	0	0	0	0	0	0	0	0	0	0	0	0	2
GCA_900040305.1	st1446	98.345	100	0	0	0	0	100	0	0	0	0	0	0	0	0	0	0	0	0	2
GCA_900040395.1	st698	99.409	99.78	0	0	0	0	0	0	0	0	0	0	0	0	100	0	0	0	0	2
GCA_900044405.1	st127	98.463	100	0	0	0	0	100	0	0	0	0	0	0	0	0	0	0	0	0	2
GCA_900044565.1	st1487	98.463	100	0	0	0	0	100	0	0	0	0	0	0	0	0	0	0	0	0	2
GCA_900045515.1	st76	98.463	100	0	0	0	0	100	0	0	0	0	0	0	0	0	0	0	0	0	2
GCA_900045625.1	st169	98.463	99.869	0	0	0	0	100	0	0	0	0	0	0	0	0	0	0	0	0	2
GCA_900046055.1	st372	98.463	100	0	0	0	0	100	0	0	0	0	0	0	0	0	0	0	0	0	2
GCA_900046285.1	st1991	98.463	99.869	0	0	0	0	100	0	0	0	0	0	0	0	0	0	0	0	0	2
GCA_900046305.1	st2053	98.463	0	0	0	0	0	0	0	0	0	0	0	0	0	0	0	0	0	0	0
GCA_900051095.1	st1096	98.463	100	0	0	0	0	100	0	0	0	0	0	0	0	0	0	0	0	0	2
GCA_900056965.1	st474	98.463	100	0	0	0	0	100	0	0	0	0	0	0	0	0	0	0	0	0	2
GCA_900057795.1	st3056	98.463	100	0	0	0	0	100	0	0	0	0	0	0	0	0	0	0	0	0	2
GCA_900457585.1	NCTC13300	0	0	0	0	0	0	0	0	0	0	0	0	0	0	0	0	0	0	0	0
GCA_900482815.1	EOE042	98.463	100	0	0	0	0	100	0	0	0	0	0	0	0	0	0	0	0	0	2
GCA_900483215.1	EOE198	98.463	100	0	0	0	0	100	0	0	0	0	0	0	0	0	0	0	0	0	2
GCA_900483625.1	EOE237	98.463	100	0	0	0	0	100	0	0	0	0	0	0	0	0	0	0	0	0	2
GCA_900483895.1	EOE225	98.463	100	0	0	0	0	100	0	0	0	0	0	0	0	0	0	0	0	0	2
GCA_900484075.1	EOE169	98.463	100	0	0	0	0	100	0	0	0	0	0	0	0	0	0	0	0	0	2
GCA_900484535.1	EOE229	98.463	100	0	0	0	0	100	0	0	0	0	0	0	0	0	0	0	0	0	2
GCA_002124595.1	CFSA198	98.463	100	0	0	0	0	100	0	0	0	0	0	0	0	0	0	0	0	0	2
GCA_003813305.1	G0615	98.345	0	0	0	0	0	0	0	0	0	0	0	0	0	0	0	0	0	0	0
GCA_900022585.1	st648	98.463	100	0	0	0	0	100	0	0	0	0	0	0	0	0	0	0	0	0	2
GCA_900039015.1	st1310	98.463	100	0	0	100	0	100	0	0	0	0	0	0	0	0	0	0	0	0	3
GCA_900070215.1	1943STDY5698363	95.981	0	0	0	0	0	0	0	0	0	0	0	0	0	0	0	0	0	0	0
GCA_900250235.1	H1312	98.463	0	0	0	0	0	0	0	0	0	0	0	0	0	0	0	0	0	0	0
GCA_900250385.1	H1402	98.345	0	0	0	0	0	0	0	0	0	0	0	0	0	0	0	0	0	0	0
GCA_900250575.1	H1539	98.463	0	0	0	0	0	0	0	0	0	0	0	0	0	0	0	0	0	0	0
GCA_900251495.1	M3540	98.463	0	0	0	0	0	0	0	0	0	0	0	0	0	0	0	0	0	0	0
GCA_900251845.1	M3909	98.463	0	0	0	0	0	0	0	0	0	0	0	0	0	0	0	0	0	0	0
GCA_005705815.1	Lr6	98.227	99.874	0	0	0	0	98.978	0	0	0	0	0	0	0	100	0	0	0	0	3
GCA_005707015.1	R50	98.227	99.874	0	0	0	0	98.978	0	0	0	0	0	0	0	100	0	0	0	0	3
GCA_000541235.1	OCMM6066	99.409	99.874	0	0	0	0	98.978	0	0	0	0	0	0	100	0	0	0	0	0	3
GCA_000606865.1	T63898	95.981	0	0	0	0	0	0	0	0	0	0	0	0	0	0	0	0	0	0	0
GCA_000645955.1	VET1518S	0	0	0	0	0	0	0	0	0	0	0	0	0	0	0	0	0	0	0	0
GCA_000259715.1	118	97.636	99.874	0	0	0	0	98.978	0	0	0	0	0	0	0	100	0	0	0	0	3
GCA_000601585.1	F19490	99.95	99.866	0	0	0	0	0	0	0	0	0	0	0	0	0	0	0	0	0	1
GCA_000603225.1	W25799	99.95	0	0	0	0	0	0	0	0	0	0	0	0	0	0	0	0	0	0	0
GCA_001045595.1	#42S	99.9	99.874	0	0	0	0	99.048	0	0	0	0	0	0	0	100	0	0	0	0	3
GCA_002105325.1	MS4_LZD100	97.872	0	0	0	0	0	0	0	0	0	0	0	0	100	0	0	0	0	0	1
GCA_002982555.1	Case7_N1a	0	0	0	0	0	0	0	0	0	0	0	0	0	0	0	0	0	0	0	0
GCA_003710565.1	VB10363	98.111	99.874	0	0	0	0	98.978	0	0	0	0	0	0	0	100	0	0	0	0	3
GCA_003710635.1	VB14080	98.111	99.874	0	0	0	0	98.978	0	0	0	0	0	0	0	100	0	0	0	0	3
GCA_004122805.1	SAZ_16	98.227	99.874	0	0	0	0	98.978	0	0	0	0	0	0	0	100	0	0	0	0	3
GCA_001063895.1	173_SAUR	0	0	0	0	0	0	0	0	0	0	0	0	0	0	0	0	0	0	0	0
GCA_002123315.1	CFSA199	0	0	0	0	0	0	0	0	0	0	0	0	0	0	0	0	0	0	0	0
GCA_003310825.1	AK017	97.872	99.78	0	0	0	0	99.729	0	0	0	0	0	0	100	0	0	0	0	0	3
GCA_004137005.1	P8	97.872	99.78	0	0	0	0	99.729	0	0	93.827	0	0	0	100	0	0	0	0	0	4
GCA_004137015.1	P2	97.872	99.78	0	0	0	0	99.729	0	0	93.827	0	0	0	100	0	0	0	0	0	4
GCA_004137725.1	P3	97.872	99.78	0	0	0	0	99.729	0	0	93.827	0	0	0	100	0	0	0	0	0	4
GCA_004168725.1	P11	97.872	99.78	0	0	0	0	99.729	0	0	93.827	0	0	0	100	0	0	0	0	0	4
GCA_004168805.1	W	97.872	99.78	0	0	0	0	99.729	0	0	93.827	0	0	0	100	0	0	0	0	0	4
GCA_004168815.1	P15	97.872	99.78	0	0	0	0	99.729	0	0	93.827	0	0	0	100	0	0	0	0	0	4
GCA_004168825.1	HCW	97.872	99.78	0	0	0	0	99.729	0	0	93.827	0	0	0	100	0	0	0	0	0	4
GCA_005861085.1	YNSA210	97.872	99.78	0	0	0	0	99.729	0	0	0	0	0	0	100	0	0	0	0	0	3
GCA_005861375.1	YNSA103	97.872	99.78	0	0	0	0	99.729	0	0	0	0	0	0	100	0	0	0	0	0	3
GCA_005861525.1	YNSA38	97.872	99.78	0	0	0	0	99.729	0	0	0	0	0	0	100	0	0	0	0	0	3
GCA_005862085.1	YNSA7	97.872	99.78	0	0	0	0	99.729	0	0	0	0	0	0	100	0	0	0	0	0	3
GCA_900251195.1	M3165	95.745	0	0	0	99.844	0	0	0	0	0	0	0	0	100	0	0	0	0	0	2
GCA_001296985.1	GR2	98.227	99.78	0	0	100	0	99.048	0	0	0	0	0	0	100	0	0	0	0	0	4
GCA_000645415.1	VET0679S	98.463	0	0	0	0	0	0	0	0	0	0	0	0	0	0	0	0	0	0	0
GCA_000645575.1	VET1020S	98.463	0	0	0	0	0	0	0	0	0	0	0	0	0	0	0	0	0	0	0
GCA_000646015.1	VET1646S	98.463	0	0	0	0	0	0	0	0	0	0	0	0	0	0	0	0	0	0	0
GCA_004152765.1	SCPM-O-B-8470	98.463	0	0	0	0	0	0	0	0	0	0	0	0	0	0	0	0	0	0	0
GCA_000221765.2	21266	97.872	0	0	0	0	0	0	0	0	0	0	0	0	0	0	0	0	0	0	0
GCA_000242575.2	21333	98.227	99.78	0	0	100	0	0	0	0	0	0	0	0	100	0	0	0	0	0	3
GCA_000582725.1	S0924	98.227	99.642	0	0	100	0	99.048	0	0	0	0	0	0	100	0	0	0	0	0	4
GCA_000705475.1	SA7-LAU	99.9	0	0	0	0	0	0	0	0	0	0	0	0	0	0	0	0	0	0	0
GCA_003418515.1	M1K006	0	0	0	0	0	0	0	0	0	0	0	0	0	0	0	0	0	0	0	0
GCA_003419405.1	M1K051	0	0	0	0	0	0	0	0	0	0	0	0	0	0	0	0	0	0	0	0
GCA_003419665.1	M1K122	97.872	0	0	0	0	0	0	0	0	0	0	0	0	0	0	0	0	0	0	0
GCA_003422985.1	M6K207	0	0	0	0	0	0	0	0	0	0	0	0	0	0	0	0	0	0	0	0
GCA_003423465.1	M6K221	0	0	0	0	0	0	99.048	0	0	0	0	0	0	0	0	0	0	0	0	1
GCA_006385695.1	GSJ/2016-SA-001	99.882	0	0	0	0	0	0	0	0	0	0	0	0	0	0	0	0	0	0	0
GCA_900046325.1	st2073	98.227	99.78	0	0	100	0	0	0	0	0	0	0	0	100	0	0	0	0	0	3
GCA_900126195.1	3688STDY6124926	95.863	0	0	0	0	0	0	0	0	0	0	0	0	0	0	0	0	0	0	0
GCA_002124675.1	CFSA171	98.463	0	0	0	0	0	0	0	0	0	0	0	0	0	0	0	0	0	0	0
GCA_003309705.1	S1AD014	99.409	100	0	0	0	0	99.864	0	0	0	0	0	0	99.928	0	0	0	0	0	3
GCA_003417145.1	M1C017	0	0	0	0	0	0	0	0	0	0	0	0	0	0	0	0	0	0	0	0
GCA_003419845.1	M1K151	97.872	0	0	0	0	0	0	0	0	0	0	0	0	0	0	0	0	0	0	0
GCA_003420705.1	M6C034	0	0	0	0	0	0	0	0	0	0	0	0	0	0	0	0	0	0	0	0
GCA_003420755.1	M6C037	0	0	0	0	0	0	0	0	0	0	0	0	0	0	0	0	0	0	0	0
GCA_003422005.1	M6K095	99.882	0	0	0	0	0	0	0	0	0	0	0	0	0	0	0	0	0	0	0
GCA_003422605.1	M6K162	0	0	0	0	0	0	0	0	0	0	0	0	0	0	0	0	0	0	0	0
GCA_003425225.1	M6KS0560_1	0	0	0	0	0	0	0	0	0	0	0	0	0	0	0	0	0	0	0	0
GCA_900097325.1	040H	99.409	0	0	0	0	0	0	0	0	0	0	0	0	0	0	0	0	0	0	0
GCA_900124685.1	3688STDY6124974	99.409	0	0	0	0	0	0	0	0	0	0	0	0	0	0	0	0	0	0	0
GCA_900125835.1	3688STDY6124872	98.227	0	0	0	0	0	0	0	0	0	0	0	0	0	0	0	0	0	0	0
GCA_000815125.1	33b	0	0	0	0	0	0	0	0	0	0	0	0	0	0	0	0	0	0	0	0
GCA_001580515.1	UTSW MRSA 55	99.882	99.748	0	0	0	0	98.978	0	0	0	0	0	0	0	0	0	0	0	0	2
GCA_002000565.1	USA300-SUR9	99.882	99.874	0	0	0	0	99.048	0	0	0	0	0	0	0	100	0	0	0	0	3
GCA_002000625.1	USA300-SUR12	99.882	99.874	0	0	0	0	98.978	0	0	0	0	0	0	0	100	0	0	0	0	3
GCA_002000705.1	USA300-SUR16	99.882	99.874	0	0	0	0	98.978	0	0	0	0	0	0	0	100	0	0	0	0	3
GCA_003073435.1	OXLIM	0	0	0	0	0	0	0	0	0	0	0	0	0	0	0	0	0	0	0	0
GCA_003193965.1	AR_0225	99.764	99.874	0	0	0	0	98.978	0	0	0	0	0	0	0	0	0	0	0	0	2
GCA_003595505.1	USA300-SUR8	99.882	99.874	0	0	0	0	99.048	0	0	0	0	0	0	0	100	0	0	0	0	3
GCA_900635265.1	NCTC12233	0	0	0	0	0	0	0	0	0	0	0	0	0	0	0	0	0	0	0	0
GCA_001471715.2	FDAARGOS_140	99.95	0	0	0	0	0	0	0	0	0	0	0	0	0	0	0	0	0	0	0
GCA_000538575.1	UCIM6018	99.882	99.874	0	0	0	0	99.048	0	0	0	0	0	0	0	0	0	0	0	0	2
GCA_000538875.1	LPIH6021	99.882	99.874	0	0	0	0	98.444	0	0	0	0	0	0	0	0	0	0	0	0	2
GCA_000539255.1	HOAG6084	99.95	100	0	0	0	0	0	0	0	0	0	0	0	0	0	0	0	0	0	1
GCA_000539735.1	HOAG6017	99.882	99.874	0	0	0	0	98.978	0	0	0	0	0	0	0	0	0	0	0	0	2
GCA_000540115.1	SCOA6006	99.882	99.874	0	0	0	0	98.978	0	0	0	0	0	0	0	0	0	0	0	0	2
GCA_000540475.1	LPIH6011	99.882	0	0	0	0	0	98.444	0	0	0	0	0	0	0	0	0	0	0	0	1
GCA_000541135.1	COAS6059	99.882	99.874	0	0	0	0	98.978	0	0	0	0	0	0	0	0	0	0	0	0	2
GCA_000541155.1	WMCS6055	99.882	99.874	0	0	0	0	99.048	0	0	0	0	0	0	0	0	0	0	0	0	2
GCA_000541195.1	GGMC6049	99.882	99.874	0	0	0	0	99.184	0	0	0	0	0	0	0	0	0	0	0	0	2
GCA_000542845.1	OCMM6137	99.882	99.874	0	0	0	0	98.978	0	0	0	0	0	0	0	0	0	0	0	0	2
GCA_000542865.1	OCMM6140	99.882	99.874	0	0	0	0	98.978	0	0	0	0	0	0	0	0	0	0	0	0	2
GCA_000543165.1	UCIM6147	99.95	100	0	0	0	0	100	0	0	0	0	0	0	0	0	0	0	0	0	2
GCA_000546645.1	M1035	99.882	0	0	0	0	0	98.978	0	0	0	0	0	0	0	0	0	0	0	0	1
GCA_000559685.1	M13384	99.95	0	0	0	0	0	0	0	0	0	0	0	0	0	0	0	0	0	0	0
GCA_000559985.1	W85047	99.95	0	0	0	0	0	0	0	0	0	0	0	0	0	0	0	0	0	0	0
GCA_000560105.1	T66282	99.95	0	0	0	0	0	0	0	0	0	0	0	0	0	0	0	0	0	0	0
GCA_000560165.1	M45245	99.95	0	0	0	0	0	0	0	0	0	0	0	0	0	0	0	0	0	0	0
GCA_000560285.1	M64164	99.95	0	0	0	0	0	0	0	0	0	0	0	0	0	0	0	0	0	0	0
GCA_000561065.1	H21935	99.95	0	0	0	0	0	0	0	0	0	0	0	0	0	0	0	0	0	0	0
GCA_000561925.1	F80381	99.95	0	0	0	0	0	0	0	0	0	0	0	0	0	0	0	0	0	0	0
GCA_000562205.1	H48646	99.95	0	0	0	0	0	0	0	0	0	0	0	0	0	0	0	0	0	0	0
GCA_000562815.1	F77710	99.95	0	0	0	0	0	0	0	0	0	0	0	0	0	0	0	0	0	0	0
GCA_000562935.1	T12818	99.95	100	0	0	0	0	0	0	0	0	0	0	0	0	0	0	0	0	0	1
GCA_000563355.1	H31290	99.95	0	0	0	0	0	0	0	0	0	0	0	0	0	0	0	0	0	0	0
GCA_000563415.1	H40575	99.95	0	0	0	0	0	0	0	0	0	0	0	0	0	0	0	0	0	0	0
GCA_000563775.1	M31588	99.95	0	0	0	0	0	0	0	0	0	0	0	0	0	0	0	0	0	0	0
GCA_000563835.1	M65003	99.95	0	0	0	0	0	0	0	0	0	0	0	0	0	0	0	0	0	0	0
GCA_000569475.1	T54294	99.882	99.874	0	0	0	0	98.978	0	0	0	0	0	0	100	0	0	0	0	0	3
GCA_000569495.1	T54280	99.882	99.874	0	0	0	0	98.978	0	0	0	0	0	0	0	0	0	0	0	0	2
GCA_000569835.1	M77225	99.882	99.874	0	0	0	0	98.978	0	0	0	0	0	0	0	0	0	0	0	0	2
GCA_000570415.1	W81816	99.882	0	0	0	0	0	0	0	0	0	0	0	0	0	0	0	0	0	0	0
GCA_000570575.1	T92889	99.882	99.874	0	0	0	0	98.978	0	0	0	0	0	0	100	0	0	0	0	0	3
GCA_000570855.1	T16669	99.882	99.874	0	0	0	0	98.978	0	0	0	0	0	0	0	0	0	0	0	0	2
GCA_000571075.1	M53327	99.882	99.874	0	0	0	0	98.978	0	0	0	0	0	0	0	0	0	0	0	0	2
GCA_000571095.1	M46077	99.882	99.874	0	0	0	0	98.978	0	0	0	0	0	0	0	0	0	0	0	0	2
GCA_000571355.1	H58183	99.882	99.874	0	0	0	0	98.978	0	0	0	0	0	0	0	0	0	0	0	0	2
GCA_000572345.1	WMCA6126	99.882	99.874	0	0	0	0	98.978	0	0	0	0	0	0	0	0	0	0	0	0	2
GCA_000572905.1	HBHO6050	99.9	99.874	0	0	0	0	0	0	0	0	0	0	0	0	0	0	0	0	0	1
GCA_000573025.1	COAS6044	99.882	0	0	0	0	0	0	0	0	0	0	0	0	0	0	0	0	0	0	0
GCA_000576755.1	F41902	99.882	100	0	0	0	0	0	0	0	0	0	0	0	0	0	0	0	0	0	1
GCA_000576905.1	T45940	99.95	99.874	0	0	0	0	98.978	0	0	0	0	0	0	0	0	0	0	0	0	2
GCA_000577025.1	F77709	99.882	99.874	0	0	0	0	98.909	0	0	0	0	0	0	0	0	0	0	0	0	2
GCA_000577175.1	F46785	99.882	100	0	0	0	0	99.184	0	0	0	0	0	0	0	0	0	0	0	0	2
GCA_000577625.1	W29625	99.882	99.874	0	0	0	0	98.978	0	0	0	0	0	0	0	0	0	0	0	0	2
GCA_000578315.1	T77618	99.882	99.874	0	0	0	0	98.978	0	0	0	0	0	0	0	0	0	0	0	0	2
GCA_000578775.1	H44015	99.882	99.874	0	0	0	0	98.841	0	0	0	0	0	0	0	0	0	0	0	0	2
GCA_000579055.1	M49455	99.882	99.874	0	0	0	0	98.978	0	0	0	0	0	0	0	0	0	0	0	0	2
GCA_000579095.1	M49474	0	0	0	0	0	0	0	0	0	0	0	0	0	0	0	0	0	0	0	0
GCA_000579315.1	F85711	99.882	0	0	0	0	0	0	0	0	0	0	0	0	0	0	0	0	0	0	0
GCA_000579335.1	F89053	99.95	100	0	0	0	0	0	0	0	0	0	0	0	0	0	0	0	0	0	1
GCA_000579715.1	M59248	99.882	99.874	0	0	0	0	98.978	0	0	0	0	0	0	0	0	0	0	0	0	2
GCA_000579915.1	T36111	0	0	0	0	0	0	0	0	0	0	0	0	0	0	0	0	0	0	0	0
GCA_000580055.1	W79968	99.882	99.874	0	0	0	0	98.978	0	0	0	0	0	0	0	0	0	0	0	0	2
GCA_000586995.1	W12582	99.882	99.874	0	0	0	0	98.978	0	0	0	0	0	0	100	0	0	0	0	0	3
GCA_000587095.1	T32086	99.882	0	0	0	0	0	98.978	0	0	0	0	0	0	0	0	0	0	0	0	1
GCA_000587535.1	H65878	99.882	99.874	0	0	0	0	98.909	0	0	0	0	0	0	0	0	0	0	0	0	2
GCA_000587735.1	F27252	99.882	99.874	0	0	0	0	98.909	0	0	0	0	0	0	0	0	0	0	0	0	2
GCA_000605225.1	M13099	99.95	0	0	0	0	0	99.184	0	0	0	0	0	0	0	0	0	0	0	0	1
GCA_000605285.1	M24416	99.882	99.874	0	0	0	0	98.978	0	0	0	0	0	0	0	0	0	0	0	0	2
GCA_000605645.1	T52642	99.882	99.874	0	0	0	0	98.978	0	0	0	0	0	0	0	0	0	0	0	0	2
GCA_000606245.1	F48422	99.882	99.874	0	0	0	0	98.978	0	0	0	0	0	0	0	0	0	0	0	0	2
GCA_000606685.1	M67953	99.882	99.874	0	0	0	0	98.978	0	0	0	0	0	0	0	0	0	0	0	0	2
GCA_000607065.1	W76995	99.882	0	0	0	0	0	0	0	0	0	0	0	0	0	0	0	0	0	0	0
GCA_002303835.1	BD11451	99.882	99.874	0	0	0	0	99.048	0	0	0	0	0	0	0	0	0	0	0	0	2
GCA_000247335.2	IS-91	99.882	99.874	0	0	0	0	98.909	0	0	0	0	0	0	0	0	0	0	0	0	2
GCA_000258475.1	CO-23	99.882	99.874	0	0	0	0	98.909	0	0	0	0	0	0	0	0	0	0	0	0	2
GCA_000596725.1	W60060	99.882	99.874	0	0	0	0	98.978	0	0	0	0	0	0	0	0	0	0	0	0	2
GCA_000596885.1	W65865	99.882	99.874	0	0	0	0	98.978	0	0	0	0	0	0	0	0	0	0	0	0	2
GCA_000596945.1	F76239	99.882	99.874	0	0	0	0	98.978	0	0	0	0	0	0	0	0	0	0	0	0	2
GCA_000597505.1	W89268	99.95	100	0	0	0	0	0	0	0	0	0	0	0	0	0	0	0	0	0	1
GCA_000601665.1	H59329	99.95	99.874	0	0	0	0	0	0	0	0	0	0	0	0	0	0	0	0	0	1
GCA_000602305.1	F71576	99.95	0	0	0	0	0	0	0	0	0	0	0	0	0	0	0	0	0	0	0
GCA_000602445.1	H47117	99.882	99.874	0	0	0	0	98.978	0	0	0	0	0	0	0	0	0	0	0	0	2
GCA_000602705.1	W52298	99.882	99.874	0	0	0	0	98.978	0	0	0	0	0	0	0	0	0	0	0	0	2
GCA_000602905.1	M67929_020413	99.882	99.874	0	0	0	0	98.978	0	0	0	0	0	0	0	0	0	0	0	0	2
GCA_000602985.1	W24177	99.882	99.874	0	0	0	0	98.978	0	0	0	0	0	0	0	0	0	0	0	0	2
GCA_000982775.1	USFL094	99.882	99.874	0	0	0	0	98.978	0	0	0	0	0	0	0	0	0	0	0	0	2
GCA_001046105.1	C1407	99.882	99.874	0	0	0	0	99.184	0	0	0	0	0	0	0	0	0	0	0	0	2
GCA_001046195.1	C1396	99.882	99.874	0	0	0	0	98.978	0	0	0	0	0	0	0	0	0	0	0	0	2
GCA_001046485.1	C2191	99.882	99.874	0	0	0	0	98.978	0	0	0	0	0	0	0	0	0	0	0	0	2
GCA_001047835.1	USFL005	99.882	99.874	0	0	0	0	99.036	0	0	0	0	0	0	0	0	0	0	0	0	2
GCA_001065315.1	519_SAUR	99.882	99.874	0	0	0	0	99.184	0	0	0	0	0	0	0	0	0	0	0	0	2
GCA_001194545.1	USFL149	99.882	99.874	0	0	0	0	98.978	0	0	0	0	0	0	0	0	0	0	0	0	2
GCA_001196025.1	USFL135	97.991	0	0	0	0	0	0	0	0	0	0	0	0	0	0	0	0	0	0	0
GCA_001197735.1	USFL255	99.882	99.874	0	0	0	0	98.978	0	0	0	0	0	0	0	0	0	0	0	0	2
GCA_001198775.1	USFL296	99.882	99.874	0	0	0	0	98.978	0	0	0	0	0	0	0	0	0	0	0	0	2
GCA_001200375.1	USFL193	99.882	99.874	0	0	0	0	98.978	0	0	0	0	0	0	0	0	0	0	0	0	2
GCA_001200515.1	USFL325	99.882	99.874	0	0	0	0	98.978	0	0	0	0	0	0	0	0	0	0	0	0	2
GCA_001202095.1	USFL120	99.882	99.874	0	0	0	0	98.978	0	0	0	0	0	0	0	0	0	0	0	0	2
GCA_001202175.1	USFL295	99.882	99.874	0	0	0	0	98.978	0	0	0	0	0	0	0	0	0	0	0	0	2
GCA_001202535.1	USFL175	99.882	99.874	0	0	0	0	98.978	0	0	0	0	0	0	0	0	0	0	0	0	2
GCA_001203755.1	FL375	99.882	99.874	0	0	0	0	98.978	0	0	0	0	0	0	0	0	0	0	0	0	2
GCA_001204295.1	USFL209	99.882	99.874	0	0	0	0	98.978	0	0	0	0	0	0	0	0	0	0	0	0	2
GCA_001205195.1	USFL070	99.882	99.874	0	0	0	0	98.978	0	0	0	0	0	0	0	0	0	0	0	0	2
GCA_001207315.1	FL395	99.882	99.874	0	0	0	0	98.978	0	0	0	0	0	0	0	0	0	0	0	0	2
GCA_001208745.1	USFL269	99.882	99.874	0	0	0	0	98.978	0	0	0	0	0	0	0	0	0	0	0	0	2
GCA_001209545.1	USFL320	99.882	99.874	0	0	0	0	98.978	0	0	0	0	0	0	0	0	0	0	0	0	2
GCA_001209565.1	USFL328	99.882	0	0	0	0	0	0	0	0	0	0	0	0	0	0	0	0	0	0	0
GCA_001209605.1	USFL344	99.882	99.874	0	0	0	0	98.978	0	0	0	0	0	0	0	0	0	0	0	0	2
GCA_001209625.1	USFL304	99.882	99.874	0	0	0	0	98.978	0	0	0	0	0	0	0	0	0	0	0	0	2
GCA_001209725.1	USFL240	99.882	99.874	0	0	0	0	98.978	0	0	0	0	0	0	0	0	0	0	0	0	2
GCA_001210205.1	FL394	99.882	99.874	0	0	0	0	98.909	0	0	0	0	0	0	0	0	0	0	0	0	2
GCA_001210225.1	USFL020	99.95	0	0	0	0	0	0	0	0	0	0	0	0	0	0	0	0	0	0	0
GCA_001210325.1	USFL100	99.882	0	0	0	0	0	0	0	0	0	0	0	0	99.928	0	0	0	0	0	1
GCA_001211885.1	FL373	99.882	99.874	0	0	0	0	98.978	0	0	0	0	0	0	0	0	0	0	0	0	2
GCA_001212305.1	USFL161	99.882	99.874	0	0	0	0	98.978	0	0	0	0	0	0	0	0	0	0	0	0	2
GCA_001262255.1	USFL194	99.882	99.874	0	0	0	0	98.978	0	0	0	0	0	0	99.928	0	0	0	0	0	3
GCA_001351735.1	USFL228	99.882	0	0	0	0	0	99.184	0	0	0	0	0	0	0	0	0	0	0	0	1
GCA_001351855.1	USFL192	99.882	99.874	0	0	0	0	98.978	0	0	0	0	0	0	0	0	0	0	0	0	2
GCA_001352115.1	USFL054	99.882	99.874	0	0	0	0	98.978	0	0	0	0	0	0	0	0	0	0	0	0	2
GCA_001352195.1	USFL340	99.882	99.874	0	0	0	0	98.978	0	0	0	0	0	0	0	0	0	0	0	0	2
GCA_001352655.1	USFL065	99.882	99.874	0	0	0	0	98.978	0	0	0	0	0	0	0	0	0	0	0	0	2
GCA_001353215.1	USFL285	99.882	99.874	0	0	0	0	98.978	0	0	0	0	0	0	0	0	0	0	0	0	2
GCA_001353495.1	USFL107	99.882	99.874	0	0	0	0	98.978	0	0	0	0	0	0	0	0	0	0	0	0	2
GCA_001353535.1	USFL163	99.882	99.874	0	0	0	0	98.978	0	0	0	0	0	0	0	0	0	0	0	0	2
GCA_001353595.1	USFL169	99.882	100	0	0	0	0	98.978	0	0	0	0	0	0	0	0	0	0	0	0	2
GCA_001353735.1	USFL154	99.882	99.874	0	0	0	0	98.978	0	0	0	0	0	0	0	0	0	0	0	0	2
GCA_001354055.1	USFL182	99.882	99.874	0	0	0	0	98.978	0	0	0	0	0	0	99.928	0	0	0	0	0	3
GCA_001354235.1	USFL140	99.882	99.874	0	0	0	0	98.978	0	0	0	0	0	0	0	0	0	0	0	0	2
GCA_001448035.1	MRSA_S4	99.882	99.874	0	0	0	0	98.978	0	0	0	0	0	0	0	0	0	0	0	0	2
GCA_001457095.1	MRSA_S5	99.882	99.874	0	0	0	0	98.978	0	0	0	0	0	0	99.928	0	0	0	0	0	3
GCA_002085545.1	MEH7	99.882	99.874	0	0	0	0	98.978	0	0	0	0	0	0	0	0	0	0	0	0	2
GCA_002267155.1	UV170	97.991	0	0	0	0	0	0	0	0	0	0	0	0	0	0	0	0	0	0	0
GCA_002738585.1	smg11	98.463	100	0	0	0	0	0	0	0	0	0	0	0	0	0	0	0	0	0	1
GCA_002983255.1	Case2_N13c	99.882	99.874	0	0	0	0	98.978	0	0	0	0	0	0	0	0	0	0	0	0	2
GCA_002983395.1	Case1_N11	99.882	99.874	0	0	0	0	98.978	0	0	0	0	0	0	0	0	0	0	0	0	2
GCA_003571195.1	STV232L	99.882	99.874	0	0	0	0	98.978	0	0	0	0	0	0	0	0	0	0	0	0	2
GCA_003571335.1	STV262L	99.764	99.874	0	0	0	0	98.978	0	0	0	0	0	0	0	0	0	0	0	0	2
GCA_900233935.1	Gabon_2009_1	99.882	99.874	0	0	0	0	98.978	0	0	0	0	0	0	99.928	0	0	0	0	0	3
GCA_001060795.1	1283_SAUR	99.882	99.874	0	0	0	0	98.978	0	0	0	0	0	0	0	0	0	0	0	0	2
GCA_001063955.1	192_SAUR	99.882	0	0	0	0	0	98.444	0	0	0	0	0	0	0	0	0	0	0	0	1
GCA_001064135.1	251_SAUR	99.882	99.874	0	0	0	0	98.978	0	0	0	0	0	0	0	0	0	0	0	0	2
GCA_001066425.1	815_SAUR	99.882	99.874	0	0	0	0	98.978	0	0	0	0	0	0	0	0	0	0	0	0	2
GCA_001191895.1	USFL024	99.882	99.874	0	0	0	0	98.978	0	0	0	0	0	0	0	0	0	0	0	0	2
GCA_001196435.1	FL363	99.882	99.874	0	0	0	0	98.978	0	0	0	0	0	0	0	0	0	0	0	0	2
GCA_001198115.1	FL384	99.882	99.874	0	0	0	0	98.978	0	0	0	0	0	0	0	0	0	0	0	0	2
GCA_001212385.1	FL377	99.882	99.874	0	0	0	0	98.978	0	0	0	0	0	0	0	0	0	0	0	0	2
GCA_001287525.1	2588STDY5748538	99.882	99.874	0	0	0	0	98.978	0	0	0	0	0	0	0	0	0	0	0	0	2
GCA_001287545.1	2588STDY5748123	99.882	0	0	0	0	0	0	0	0	0	0	0	0	0	0	0	0	0	0	0
GCA_001287645.1	2588STDY5748520	99.882	99.874	0	0	0	0	99.184	0	0	0	0	0	0	0	0	0	0	0	0	2
GCA_001287705.1	2588STDY5627566	99.882	99.874	0	0	0	0	98.978	0	0	0	0	0	0	0	0	0	0	0	0	2
GCA_001287765.1	2588STDY5748648	99.882	100	0	0	0	0	0	0	0	0	0	0	0	0	0	0	0	0	0	1
GCA_001287805.1	2588STDY5748917	99.882	99.874	0	0	0	0	98.978	0	0	0	0	0	0	0	0	0	0	0	0	2
GCA_001288185.1	2588STDY5748696	99.882	99.874	0	0	0	0	98.978	0	0	0	0	0	0	0	0	0	0	0	0	2
GCA_001288425.1	2588STDY5763864	99.882	99.874	0	0	0	0	98.978	0	0	0	0	0	0	0	0	0	0	0	0	2
GCA_001288585.1	2588STDY5627519	99.882	99.874	0	0	0	0	98.978	0	0	0	0	0	0	0	0	0	0	0	0	2
GCA_001288665.1	2588STDY5627608	99.95	0	0	0	0	0	0	0	0	0	0	0	0	0	0	0	0	0	0	0
GCA_001288705.1	2588STDY5627554	99.882	99.874	0	0	0	0	98.978	0	0	0	0	0	0	100	0	0	0	0	0	3
GCA_001289045.1	2588STDY5748898	99.882	100	0	0	0	0	98.978	0	0	0	0	0	0	0	0	0	0	0	0	2
GCA_001289245.1	2588STDY5748146	99.882	99.874	0	0	0	0	98.978	0	0	0	0	0	0	0	0	0	0	0	0	2
GCA_001289325.1	2588STDY5748758	99.882	99.874	0	0	0	0	98.978	0	0	0	0	0	0	0	0	0	0	0	0	2
GCA_001289525.1	2588STDY5748711	99.882	99.874	0	0	0	0	98.978	0	0	0	0	0	0	0	0	0	0	0	0	2
GCA_001289805.1	2588STDY5748727	99.882	99.874	0	0	0	0	98.978	0	0	0	0	0	0	0	0	0	0	0	0	2
GCA_001289865.1	2588STDY5627537	99.764	99.874	0	0	0	0	98.978	0	0	0	0	0	0	0	0	0	0	0	0	2
GCA_001290005.1	2588STDY5748888	99.882	99.874	0	0	0	0	98.978	0	0	0	0	0	0	0	0	0	0	0	0	2
GCA_001290045.1	2588STDY5763904	99.882	99.874	0	0	0	0	98.978	0	0	0	0	0	0	0	0	0	0	0	0	2
GCA_001290225.1	2588STDY5748164	99.882	99.874	0	0	0	0	98.978	0	0	0	0	0	0	0	0	0	0	0	0	2
GCA_001290265.1	2588STDY5627594	99.882	99.874	0	0	0	0	98.978	0	0	0	0	0	0	0	0	0	0	0	0	2
GCA_001290505.1	2588STDY5748925	99.882	99.874	0	0	0	0	98.978	0	0	0	0	0	0	0	0	0	0	0	0	2
GCA_001290745.1	2588STDY5747941	99.882	99.874	0	0	0	0	98.978	0	0	0	0	0	0	99.928	0	0	0	0	0	3
GCA_001290845.1	2588STDY5748913	99.882	99.874	0	0	0	0	98.978	0	0	0	0	0	0	0	0	0	0	0	0	2
GCA_001291185.1	2588STDY5763876	99.882	99.874	0	0	0	0	98.978	0	0	0	0	0	0	0	0	0	0	0	0	2
GCA_001291225.1	2588STDY5748695	99.882	99.874	0	0	0	0	98.978	0	0	0	0	0	0	0	0	0	0	0	0	2
GCA_002121025.1	CFSA335	99.882	99.874	0	0	0	0	98.978	0	0	0	0	0	0	0	0	0	0	0	0	2
GCA_002121245.1	CFSA312	99.882	99.874	0	0	0	0	99.456	0	0	0	0	0	0	99.375	0	0	0	0	0	3
GCA_002121755.1	CFSA259	99.95	0	0	0	0	0	0	0	0	0	0	0	0	0	0	0	0	0	0	0
GCA_002121775.1	CFSA255	99.95	0	0	0	0	0	0	0	0	0	0	0	0	0	0	0	0	0	0	0
GCA_002122155.1	CFSA363	99.882	99.874	0	0	0	0	98.978	0	0	0	0	0	0	0	0	0	0	0	0	2
GCA_002122415.1	CFSA321	99.882	99.748	0	0	0	0	98.978	0	0	0	0	0	0	0	0	0	0	0	0	2
GCA_002122685.1	CFSA285	99.882	99.874	0	0	0	0	98.978	0	0	0	0	0	0	0	0	0	0	0	0	2
GCA_002124015.1	CFSA115	99.882	99.874	0	0	0	0	98.978	0	0	0	0	0	0	0	0	0	0	0	0	2
GCA_002124055.1	CFSA111	99.95	0	0	0	0	0	0	0	0	0	0	0	0	0	0	0	0	0	0	0
GCA_002124105.1	CFSA103	99.882	99.874	0	0	0	0	98.978	0	0	0	0	0	0	0	0	0	0	0	0	2
GCA_002124455.1	CFSA217	99.882	100	0	0	0	0	98.978	0	0	0	0	0	0	0	0	0	0	0	0	2
GCA_002124945.1	CFSA146	99.882	99.874	0	0	0	0	98.978	0	0	0	0	0	0	0	0	0	0	0	0	2
GCA_002125955.1	CFSA010	99.882	99.874	0	0	0	0	98.978	0	0	0	0	0	0	0	0	0	0	0	0	2
GCA_002126035.1	c59	99.882	99.874	0	0	0	0	98.978	0	0	0	0	0	0	0	0	0	0	0	0	2
GCA_002126315.1	abscess128	99.882	99.874	0	0	0	0	98.978	0	0	0	0	0	0	0	0	0	0	0	0	2
GCA_002126345.1	abscess124	99.882	0	0	0	0	0	0	0	0	0	0	0	0	0	0	0	0	0	0	0
GCA_002126815.1	CFSA013	99.882	99.874	0	0	0	0	98.978	0	0	0	0	0	0	0	0	0	0	0	0	2
GCA_002127485.1	CFSA228	99.882	99.874	0	0	0	0	98.978	0	0	0	0	0	0	0	100	0	0	0	0	3
GCA_002225085.1	TW15	99.882	99.874	0	0	0	0	98.978	0	0	0	0	0	0	0	0	0	0	0	0	2
GCA_002225275.1	TW07_3	99.882	99.874	0	0	0	0	98.978	0	0	0	0	0	0	0	0	0	0	0	0	2
GCA_002225435.1	TW01_1	99.882	99.874	0	0	0	0	98.978	0	0	0	0	0	0	0	0	0	0	0	0	2
GCA_900250275.1	H1412	99.882	0	0	0	0	0	99.184	0	0	0	0	0	0	0	0	0	0	0	0	1
GCA_900251065.1	M2959	99.882	99.874	0	0	0	0	98.978	0	0	0	0	0	0	0	0	0	0	0	0	2
GCA_900252105.1	RH150	99.882	99.748	0	0	0	0	98.978	0	0	0	0	0	0	0	0	0	0	0	0	2
GCA_000732745.1	Brady-SAP149	99.552	0	0	0	0	0	0	0	0	0	0	0	0	0	0	0	0	0	0	0
GCA_000536915.1	FVRH6076	99.882	99.874	0	0	0	0	98.978	0	0	0	0	0	0	0	0	0	0	0	0	2
GCA_000536975.1	SJOS6139	99.882	99.874	0	0	0	0	98.978	0	0	0	0	0	0	0	0	0	0	0	0	2
GCA_000536995.1	KINB6009	99.95	100	0	0	0	0	0	0	0	0	0	0	0	0	0	0	0	0	0	1
GCA_000537075.1	OCMM6065	99.882	99.874	0	0	0	0	98.978	0	0	0	0	0	0	0	0	0	0	0	0	2
GCA_000537095.1	HSOU6002	99.882	99.874	0	0	0	0	99.184	0	0	0	0	0	0	0	0	0	0	0	0	2
GCA_000593585.1	F46600	99.95	0	0	0	0	0	0	0	0	0	0	0	0	0	0	0	0	0	0	0
GCA_000593705.1	F27254	99.95	100	0	0	0	0	0	0	0	0	0	0	0	0	0	0	0	0	0	1
GCA_000593805.1	M24487	99.95	0	0	0	0	0	0	0	0	0	0	0	0	0	0	0	0	0	0	0
GCA_000593885.1	T60795	99.882	99.874	0	0	0	0	98.978	0	0	0	0	0	0	0	0	0	0	0	0	2
GCA_000593965.1	M13048	99.882	0	0	0	0	0	0	0	0	0	0	0	0	0	0	0	0	0	0	0
GCA_000594225.1	T37849	99.882	99.748	0	0	0	0	98.978	0	0	0	0	0	0	0	0	0	0	0	0	2
GCA_000594365.1	H58177	99.882	99.874	0	0	0	0	98.978	0	0	0	0	0	0	0	0	0	0	0	0	2
GCA_000594745.1	H84956	99.882	0	0	0	0	0	98.978	0	0	0	0	0	0	0	0	0	0	0	0	1
GCA_000594885.1	F45779	99.882	99.874	0	0	0	0	98.978	0	0	0	0	0	0	0	0	0	0	0	0	2
GCA_000594905.1	F36091	99.882	99.874	0	0	0	0	98.909	0	0	0	0	0	0	0	0	0	0	0	0	2
GCA_001045715.1	C679	97.991	0	0	0	0	0	0	0	0	0	0	0	0	0	0	0	0	0	0	0
GCA_001045805.1	C123	99.173	0	0	0	0	0	0	0	0	0	0	0	0	99.928	0	0	0	0	0	1
GCA_001046295.1	C2485	99.9	0	0	0	0	0	0	0	0	0	0	0	0	0	0	0	0	0	0	0
GCA_001047875.1	USFL002	97.991	0	0	0	0	0	99.184	0	0	0	0	0	0	100	0	0	0	0	0	2
GCA_001067055.1	714_SAUR	98.463	0	0	0	0	0	0	0	0	0	0	0	0	0	100	0	0	0	0	1
GCA_001199655.1	USFL052	98.463	0	0	0	0	0	99.048	0	0	0	0	0	0	0	100	0	0	0	0	2
GCA_001203915.1	USFL143	99.764	0	0	0	0	0	0	0	0	0	0	0	0	0	0	0	0	0	0	0
GCA_001210985.1	USFL072	98.463	0	0	0	0	0	0	0	0	0	0	0	0	0	100	0	0	0	0	1
GCA_001353335.1	USFL022	98.463	0	0	0	0	0	99.048	0	0	0	0	0	0	0	100	0	0	0	0	2
GCA_001469995.1	UC50	95.745	0	0	0	0	0	0	0	0	0	0	0	0	0	0	0	0	0	0	0
GCA_900020355.1	st988	98.463	99.869	0	0	0	0	99.863	0	0	0	0	0	0	0	0	0	0	0	0	2
GCA_900097605.1	MRSA609	98.463	0	0	0	0	0	99.048	0	0	0	0	0	0	0	100	0	0	0	0	2
GCA_002260075.1	UC309	97.991	0	0	0	0	0	0	0	0	0	0	0	0	0	0	0	0	0	0	0
GCA_002267285.1	UC311	97.991	0	0	0	0	0	0	0	0	0	0	0	0	0	0	0	0	0	0	0
GCA_900251365.1	M3423	97.991	0	0	0	0	0	0	0	0	0	0	0	0	0	0	0	0	0	0	0
GCA_900252085.1	RH148	97.991	0	0	0	0	0	0	0	0	0	0	0	0	0	0	0	0	0	0	0
GCA_003419145.1	M1K037	99.882	100	0	0	0	0	100	0	0	0	0	0	0	0	0	0	0	0	0	2
GCA_000602785.1	F48611	99.882	99.874	0	0	0	0	98.978	0	0	0	0	0	0	0	0	0	0	0	0	2
GCA_000587495.1	H65882	98.463	100	0	0	0	0	99.383	0	0	0	0	0	0	0	100	0	0	0	0	3
GCA_000583615.1	SA0077	98.227	99.93	0	0	0	0	99.048	0	0	100	0	0	0	0	0	0	0	0	0	3
GCA_001594205.1	MCRF184	0	0	0	0	0	0	0	0	0	0	0	0	0	0	0	0	0	0	0	0
GCA_002633765.1	CFSAN007835	0	0	0	0	0	0	0	0	0	0	0	0	0	0	0	0	0	0	0	0
GCA_003073635.1	AR466	99.764	0	0	0	100	0	0	0	0	0	0	0	0	0	0	0	0	0	0	1
GCA_000362125.1	M0877	99.882	0	0	0	0	0	99.048	0	0	0	0	0	0	0	0	0	0	0	0	1
GCA_000528435.1	M0684	0	100	0	0	0	0	100	0	0	0	0	0	0	0	0	0	0	0	0	2
GCA_000543545.1	M0777	99.764	100	0	0	0	0	100	0	0	0	0	0	0	0	0	0	0	0	0	2
GCA_000543725.1	M0790	99.655	100	0	0	0	0	100	0	0	0	0	0	0	0	0	0	0	0	0	2
GCA_000545565.1	M0937	99.95	100	0	0	0	0	100	0	0	0	0	0	0	0	0	0	0	0	0	2
GCA_000573705.1	M1292	99.95	100	0	0	0	0	100	0	0	0	0	0	0	0	0	0	0	0	0	2
GCA_000574205.1	M1260	99.867	100	0	0	0	0	100	0	0	0	0	0	0	0	0	0	0	0	0	2
GCA_000574485.1	M1237	99.764	100	0	0	0	0	100	0	0	0	0	0	0	0	0	0	0	0	0	2
GCA_000574865.1	M1208	100	100	0	0	0	0	100	0	0	0	0	0	0	0	0	0	0	0	0	2
GCA_003055675.1	N2	99.409	0	0	0	0	0	99.245	0	0	0	0	0	0	0	0	0	0	0	0	1
GCA_003055715.1	N2a	99.409	0	0	0	0	0	98.978	0	0	0	0	0	0	0	0	0	0	0	0	1
GCA_000174575.1	A9635	99.882	0	0	0	0	0	0	0	0	0	0	0	0	0	0	0	0	0	0	0
GCA_000221825.2	21200	97.991	0	0	0	0	0	0	0	0	0	0	0	0	0	0	0	0	0	0	0
GCA_000602165.1	W85806_020613	97.561	0	0	0	0	0	0	0	0	0	0	0	0	100	0	0	0	0	0	1
GCA_003236755.1	CM179	95.863	0	0	0	0	0	0	0	0	0	0	0	0	0	0	0	0	0	0	0
GCA_003417225.1	M1C026	97.991	0	0	0	0	0	0	0	0	0	0	0	0	0	0	0	0	0	0	0
GCA_003420885.1	M6C043	98.227	0	0	0	0	0	0	0	0	0	0	0	0	0	0	0	0	0	0	0
GCA_003422805.1	M6K185	0	0	0	0	0	0	0	0	0	0	0	0	0	0	0	0	0	0	0	0
GCA_001971525.1	H1670	96.351	0	0	0	0	0	0	0	0	0	0	0	0	0	0	0	0	0	0	0
GCA_002125465.1	CFSA045	99.291	0	0	0	0	0	0	0	0	0	0	0	0	0	0	0	0	0	0	0
GCA_003421085.1	M6C062	0	0	0	0	0	0	0	0	0	0	0	0	0	0	0	0	0	0	0	0
GCA_003422065.1	M6K102	0	0	0	0	0	0	0	0	0	0	0	0	0	0	0	0	0	0	0	0
GCA_003857355.1	C2778	99.409	0	0	0	0	0	0	0	0	0	0	0	0	0	0	0	0	0	0	0
GCA_900041895.1	st424	99.409	0	0	0	0	0	0	0	0	0	0	0	0	0	0	0	0	0	0	0
GCA_900045785.1	st436	99.95	0	0	0	0	0	0	0	0	0	0	0	0	0	0	0	0	0	0	0
GCA_900250515.1	H1480	95.745	0	0	0	0	0	0	0	0	0	0	0	0	0	0	0	0	0	0	0
GCA_900250885.1	HL463	99.409	0	0	0	0	0	0	0	0	0	0	0	0	0	0	0	0	0	0	0
GCA_000284535.1	HO 5096 0412	95.745	0	0	0	0	0	0	0	0	0	0	0	0	0	0	0	0	0	0	0
GCA_003184985.1	IT1-S	0	0	0	0	0	0	0	0	0	0	0	0	0	0	0	0	0	0	0	0
GCA_004153365.1	VB31683	95.863	100	0	0	0	0	99.048	0	0	0	0	0	0	0	0	0	0	0	0	2
GCA_001194725.1	BSAR178_2	95.745	0	0	0	0	0	99.048	0	0	0	0	0	0	0	0	0	0	0	0	1
GCA_001201795.1	BSAR748	95.745	0	0	0	0	0	0	0	0	0	0	0	0	0	0	0	0	0	0	0
GCA_001205435.1	BSAR734	95.745	0	0	0	0	0	99.048	0	0	0	0	0	0	0	0	0	0	0	0	1
GCA_001207435.1	BSAR169_2	95.745	0	0	0	0	0	99.048	0	0	0	0	0	0	0	0	0	0	0	0	1
GCA_001209425.1	BSAR486	95.745	0	0	0	0	0	99.048	0	0	0	0	0	0	0	0	0	0	0	0	1
GCA_001210925.1	BSAR870	95.745	0	0	0	0	0	99.048	0	0	0	0	0	0	0	0	0	0	0	0	1
GCA_001223785.1	91/10795	95.745	0	0	0	0	0	0	0	0	0	0	0	0	0	0	0	0	0	0	0
GCA_001230225.1	H914 91	95.745	100	0	0	0	0	0	0	0	0	0	0	0	0	0	0	0	0	0	1
GCA_001230765.1	M810 08	95.745	0	0	0	0	0	99.048	0	0	0	0	0	0	0	0	0	0	0	0	1
GCA_001232105.1	91/11785	95.745	0	0	0	0	0	99.048	0	0	0	0	0	0	0	0	0	0	0	0	1
GCA_001234725.1	NL 0113 99-5	0	0	0	0	0	0	0	0	0	0	0	0	0	0	0	0	0	0	0	0
GCA_001236745.1	930.02	95.745	0	0	0	0	0	99.048	0	0	0	0	0	0	0	0	0	0	0	0	1
GCA_001349375.1	BSAR180	95.745	0	0	0	0	0	0	0	0	0	0	0	0	0	0	0	0	0	0	0
GCA_001349475.1	BSAR188_2	95.745	0	0	0	0	0	99.048	0	0	0	0	0	0	0	0	0	0	0	0	1
GCA_001349575.1	BSAR187_2	95.745	0	0	0	0	0	0	0	0	0	0	0	0	0	0	0	0	0	0	0
GCA_001349595.1	BSAR174_2	95.745	0	0	0	0	0	99.048	0	0	0	0	0	0	0	0	0	0	0	0	1
GCA_001349655.1	BSAR185_2	95.745	0	0	0	0	0	0	0	0	0	0	0	0	0	0	0	0	0	0	0
GCA_001756665.1	VB31683	95.863	100	0	0	0	0	99.048	0	0	0	0	0	0	0	0	0	0	0	0	2
GCA_003237285.1	CM134	95.863	100	0	0	0	0	99.048	0	0	0	0	0	0	0	0	0	0	0	0	2
GCA_003237375.1	CM126	95.863	0	0	0	0	0	99.048	0	0	0	0	0	0	0	0	0	0	0	0	1
GCA_003238475.1	CM65	95.745	0	0	0	0	0	99.048	0	0	0	0	0	0	0	0	0	0	0	0	1
GCA_900017525.1	st694	95.745	0	0	0	0	0	99.048	0	0	0	0	0	0	0	0	0	0	0	0	1
GCA_900017535.1	st854	95.745	0	0	0	0	0	99.048	0	0	0	0	0	0	0	0	0	0	0	0	1
GCA_900017665.1	st2566	95.745	0	0	0	0	0	99.048	0	0	0	0	0	0	0	0	0	0	0	0	1
GCA_900017695.1	st2579	95.745	0	0	0	0	0	99.048	0	0	0	0	0	0	0	0	0	0	0	0	1
GCA_900018325.1	st1465	95.745	0	0	0	0	0	99.048	0	0	0	0	0	0	100	0	0	0	0	0	2
GCA_900018735.1	st522	95.745	0	0	0	0	0	99.048	0	0	0	0	0	0	0	0	0	0	0	0	1
GCA_900018755.1	st11	95.745	0	0	0	0	0	99.048	0	0	0	0	0	0	0	0	0	0	0	0	1
GCA_900019035.1	st105	95.745	0	0	0	0	0	99.048	0	0	0	0	0	0	0	0	0	0	0	0	1
GCA_900019065.1	st148	95.745	0	0	0	0	0	99.048	0	0	0	0	0	0	0	0	0	0	0	0	1
GCA_900019125.1	st194	95.745	0	0	0	0	0	99.048	0	0	0	0	0	0	0	0	0	0	0	0	1
GCA_900020325.1	st673	95.745	0	0	0	0	0	0	0	0	0	0	0	0	0	0	0	0	0	0	0
GCA_900020435.1	st1527	95.745	0	0	0	0	0	99.048	0	0	0	0	0	0	0	0	0	0	0	0	1
GCA_900020465.1	st999	95.745	0	0	0	0	0	99.048	0	0	0	0	0	0	0	0	0	0	0	0	1
GCA_900024995.1	st263	95.745	0	0	0	0	0	99.048	0	0	0	0	0	0	0	0	0	0	0	0	1
GCA_900025015.1	st571	95.745	0	0	0	0	0	99.048	0	0	0	0	0	0	0	0	0	0	0	0	1
GCA_900031675.1	st2201	95.745	100	0	0	0	0	0	0	0	0	0	0	0	0	0	0	0	0	0	1
GCA_900035585.1	st2672	95.745	0	0	0	0	0	99.048	0	0	0	0	0	0	0	0	0	0	0	0	1
GCA_900035765.1	st402	95.745	0	0	0	0	0	99.048	0	0	0	0	0	0	0	0	0	0	0	0	1
GCA_900035785.1	st413	95.745	0	0	0	0	0	99.048	0	0	0	0	0	0	0	0	0	0	0	0	1
GCA_900035815.1	st426	95.745	0	0	0	0	0	0	0	0	0	0	0	0	0	0	0	0	0	0	0
GCA_900035825.1	st469	95.745	0	0	0	0	0	99.048	0	0	0	0	0	0	0	0	0	0	0	0	1
GCA_900035885.1	st666	95.745	0	0	0	0	0	0	0	0	0	0	0	0	0	0	0	0	0	0	0
GCA_900035895.1	st685	95.745	0	0	0	0	0	0	0	0	0	0	0	0	0	0	0	0	0	0	0
GCA_900037605.1	st2003	95.745	0	0	0	0	0	0	0	0	0	0	0	0	0	0	0	0	0	0	0
GCA_900037675.1	st172	95.745	0	0	0	0	0	99.048	0	0	0	0	0	0	0	0	0	0	0	0	1
GCA_900037755.1	st885	95.745	0	0	0	0	0	0	0	0	0	0	0	0	0	0	0	0	0	0	0
GCA_900037825.1	st1075	95.745	0	0	0	0	0	99.048	0	0	0	0	0	0	0	0	0	0	0	0	1
GCA_900037935.1	st1173	95.745	0	0	0	0	0	99.048	0	0	0	0	0	0	0	0	0	0	0	0	1
GCA_900038195.1	st176	95.745	0	0	0	0	0	99.048	0	0	0	0	0	0	0	0	0	0	0	0	1
GCA_900038295.1	st246	95.745	0	0	0	0	0	99.048	0	0	0	0	0	0	0	0	0	0	0	0	1
GCA_900038425.1	st837	95.745	0	0	0	0	0	99.048	0	0	0	0	0	0	0	0	0	0	0	0	1
GCA_900038465.1	st289	95.745	0	0	0	0	0	99.048	0	0	0	0	0	0	0	0	0	0	0	0	1
GCA_900038525.1	st977	95.745	0	0	0	0	0	99.048	0	0	0	0	0	0	0	0	0	0	0	0	1
GCA_900038565.1	st1182	95.745	0	0	0	0	0	99.048	0	0	0	0	0	0	0	0	0	0	0	0	1
GCA_900038755.1	st443	95.745	0	0	0	0	0	0	0	0	0	0	0	0	0	0	0	0	0	0	0
GCA_900038825.1	st145	95.745	0	0	0	0	0	99.048	0	0	0	0	0	0	0	0	0	0	0	0	1
GCA_900038835.1	st236	95.745	0	0	0	0	0	0	0	0	0	0	0	0	0	0	0	0	0	0	0
GCA_900038875.1	st454	95.745	0	0	0	0	0	0	0	0	0	0	0	0	0	0	0	0	0	0	0
GCA_900039025.1	st1317	95.745	0	0	0	0	0	0	0	0	0	0	0	0	0	0	0	0	0	0	0
GCA_900039035.1	st1323	95.745	0	0	0	0	0	99.048	0	0	0	0	0	0	0	0	0	0	0	0	1
GCA_900039085.1	st1461	95.745	0	0	0	0	0	0	0	0	0	0	0	0	0	0	0	0	0	0	0
GCA_900039195.1	st1549	95.745	0	0	0	0	0	99.048	0	0	0	0	0	0	0	0	0	0	0	0	1
GCA_900039215.1	st1571	95.745	0	0	0	0	0	99.048	0	0	0	0	0	0	0	0	0	0	0	0	1
GCA_900039695.1	st725	95.745	0	0	0	0	0	99.048	0	0	0	0	0	0	0	0	0	0	0	0	1
GCA_900039845.1	st1503	95.745	0	0	0	0	0	99.048	0	0	0	0	0	0	0	0	0	0	0	0	1
GCA_900039875.1	st1578	95.745	0	0	0	0	0	99.048	0	0	0	0	0	0	0	0	0	0	0	0	1
GCA_900039965.1	st1634	95.745	0	0	0	0	0	99.048	0	0	0	0	0	0	0	0	0	0	0	0	1
GCA_900040125.1	st972	95.745	0	0	0	0	0	0	0	0	0	0	0	0	0	0	0	0	0	0	0
GCA_900040265.1	st1396	95.745	0	0	0	0	0	99.048	0	0	0	0	0	0	0	0	0	0	0	0	1
GCA_900040335.1	st1484	95.745	0	0	0	0	0	0	0	0	0	0	0	0	0	0	0	0	0	0	0
GCA_900040385.1	st1649	95.745	0	0	0	0	0	99.048	0	0	0	0	0	0	0	0	0	0	0	0	1
GCA_900040435.1	st1299	95.745	0	0	0	0	0	99.048	0	0	0	0	0	0	0	0	0	0	0	0	1
GCA_900040475.1	st1750	95.745	0	0	0	0	0	99.048	0	0	0	0	0	0	0	0	0	0	0	0	1
GCA_900040535.1	st1924	95.745	0	0	0	0	0	99.048	0	0	0	0	0	0	0	0	0	0	0	0	1
GCA_900040765.1	st1295	95.745	0	0	0	0	0	99.048	0	0	0	0	0	0	0	0	0	0	0	0	1
GCA_900040785.1	st1608	95.745	0	0	0	0	0	99.048	0	0	0	0	0	0	0	0	0	0	0	0	1
GCA_900040805.1	st1691	95.745	0	0	0	0	0	0	0	0	0	0	0	0	0	0	0	0	0	0	0
GCA_900040925.1	st983	95.745	100	0	0	0	0	99.048	0	0	0	0	0	0	100	0	0	0	0	0	3
GCA_900040955.1	st1207	95.745	0	0	0	0	0	99.048	0	0	0	0	0	0	0	0	0	0	0	0	1
GCA_900040975.1	st1312	95.745	0	0	0	0	0	0	0	0	0	0	0	0	0	0	0	0	0	0	0
GCA_900041005.1	st1469	95.745	0	0	0	0	0	99.048	0	0	0	0	0	0	0	0	0	0	0	0	1
GCA_900041125.1	st1934	95.745	0	0	0	0	0	99.048	0	0	0	0	0	0	0	0	0	0	0	0	1
GCA_900041135.1	st1971	95.745	0	0	0	0	0	0	0	0	0	0	0	0	0	0	0	0	0	0	0
GCA_900041775.1	st313	95.745	0	0	0	0	0	99.048	0	0	0	0	0	0	0	0	0	0	0	0	1
GCA_900041945.1	st850	95.745	0	0	0	0	0	0	0	0	0	0	0	0	0	0	0	0	0	0	0
GCA_900041975.1	st939	95.745	0	0	0	0	0	99.048	0	0	0	0	0	0	0	0	0	0	0	0	1
GCA_900042005.1	st990	95.626	0	0	0	0	0	99.048	0	0	0	0	0	0	0	0	0	0	0	0	1
GCA_900042025.1	st1003	95.745	0	0	0	0	0	99.048	0	0	0	0	0	0	0	0	0	0	0	0	1
GCA_900042055.1	st1074	95.745	0	0	0	0	0	0	0	0	0	0	0	0	0	0	0	0	0	0	0
GCA_900042165.1	st1403	95.745	0	0	0	0	0	0	0	0	0	0	0	0	0	0	0	0	0	0	0
GCA_900042225.1	st1542	95.745	0	0	0	0	0	0	0	0	0	0	0	0	0	0	0	0	0	0	0
GCA_900042535.1	st2154	95.745	0	0	0	0	0	99.048	0	0	0	0	0	0	0	0	0	0	0	0	1
GCA_900042545.1	st2175	95.745	0	0	0	0	0	99.048	0	0	0	0	0	0	0	0	0	0	0	0	1
GCA_900042685.1	st2329	95.745	0	0	0	0	0	99.048	0	0	0	0	0	0	0	0	0	0	0	0	1
GCA_900043925.1	st107	95.745	0	0	0	0	0	99.048	0	0	0	0	0	0	0	0	0	0	0	0	1
GCA_900044375.1	st89	95.745	0	0	0	0	0	99.048	0	0	0	0	0	0	0	0	0	0	0	0	1
GCA_900044385.1	st44	95.745	0	0	0	0	0	0	0	0	0	0	0	0	0	0	0	0	0	0	0
GCA_900044475.1	st631	95.745	0	0	0	0	0	99.048	0	0	0	0	0	0	0	0	0	0	0	0	1
GCA_900044505.1	st778	95.745	0	0	0	0	0	99.048	0	0	0	0	0	0	0	0	0	0	0	0	1
GCA_900044525.1	st1230	95.745	0	0	0	0	0	99.048	0	0	0	0	0	0	0	0	0	0	0	0	1
GCA_900044595.1	st2224	95.745	0	0	0	0	0	99.048	0	0	0	0	0	0	0	0	0	0	0	0	1
GCA_900044785.1	st2057	95.745	0	0	0	0	0	99.048	0	0	0	0	0	0	0	0	0	0	0	0	1
GCA_900044895.1	st292	95.745	0	0	0	0	0	99.048	0	0	0	0	0	0	0	0	0	0	0	0	1
GCA_900044995.1	st630	95.745	0	0	0	0	0	99.048	0	0	0	0	0	0	0	0	0	0	0	0	1
GCA_900045065.1	st1476	95.745	0	0	0	0	0	98.912	0	0	0	0	0	0	0	0	0	0	0	0	1
GCA_900045715.1	st302	95.745	0	0	0	0	0	0	0	0	0	0	0	0	0	0	0	0	0	0	0
GCA_900045935.1	st838	95.745	0	0	0	0	0	99.048	0	0	0	0	0	0	0	0	0	0	0	0	1
GCA_900046045.1	st340	95.745	0	0	0	0	0	99.048	0	0	0	0	0	0	0	0	0	0	0	0	1
GCA_900046085.1	st1729	95.745	0	0	0	0	0	0	0	0	0	0	0	0	0	0	0	0	0	0	0
GCA_900046095.1	st1735	95.745	0	0	0	0	0	0	0	0	0	0	0	0	0	0	0	0	0	0	0
GCA_900046165.1	st1799	95.745	0	0	0	0	0	99.048	0	0	0	0	0	0	0	0	0	0	0	0	1
GCA_900046265.1	st1961	95.745	0	0	0	0	0	99.048	0	0	0	0	0	0	0	0	0	0	0	0	1
GCA_900046355.1	st2121	95.745	0	0	0	0	0	99.048	0	0	0	0	0	0	0	0	0	0	0	0	1
GCA_900046405.1	st2187	95.745	0	0	0	0	0	0	0	0	0	0	0	0	0	0	0	0	0	0	0
GCA_900047235.1	st575	95.745	0	0	0	0	0	99.048	0	0	0	0	0	0	0	0	0	0	0	0	1
GCA_900047285.1	st660	95.745	0	0	0	0	0	99.048	0	0	0	0	0	0	0	0	0	0	0	0	1
GCA_900047425.1	st793	95.745	0	0	0	0	0	99.048	0	0	0	0	0	0	0	0	0	0	0	0	1
GCA_900047465.1	st72	95.745	0	0	0	0	0	99.048	0	0	0	0	0	0	0	0	0	0	0	0	1
GCA_900048205.1	st2313	95.745	0	0	0	0	0	99.048	0	0	0	0	0	0	0	0	0	0	0	0	1
GCA_900048405.1	st2491	95.745	0	0	0	0	0	99.048	0	0	0	0	0	0	0	0	0	0	0	0	1
GCA_900048555.1	st769	95.745	0	0	0	0	0	99.048	0	0	0	0	0	0	0	0	0	0	0	0	1
GCA_900048705.1	st932	95.745	0	0	0	0	0	0	0	0	0	0	0	0	0	0	0	0	0	0	0
GCA_900048775.1	st1444	95.745	0	0	0	0	0	99.048	0	0	0	0	0	0	0	0	0	0	0	0	1
GCA_900048785.1	st1495	95.745	0	0	0	0	0	99.048	0	0	0	0	0	0	0	0	0	0	0	0	1
GCA_900049315.1	st2548	95.745	100	0	0	0	0	99.048	0	0	0	0	0	0	0	0	0	0	0	0	2
GCA_900049775.1	st2923	95.745	0	0	0	0	0	99.048	0	0	0	0	0	0	0	0	0	0	0	0	1
GCA_900050275.1	st1712	95.745	0	0	0	0	0	99.048	0	0	0	0	0	0	0	0	0	0	0	0	1
GCA_900050605.1	st3142	95.745	0	0	0	0	0	99.048	0	0	0	0	0	0	0	0	0	0	0	0	1
GCA_900051065.1	st2419	95.745	0	0	0	0	0	99.048	0	0	0	0	0	0	0	0	0	0	0	0	1
GCA_900051365.1	st1140	95.745	0	0	0	0	0	99.048	0	0	0	0	0	0	0	0	0	0	0	0	1
GCA_900054445.1	st2674	95.745	0	0	0	0	0	99.048	0	0	0	0	0	0	0	0	0	0	0	0	1
GCA_900055305.1	st2343	95.745	0	0	0	0	0	0	0	0	0	0	0	0	0	0	0	0	0	0	0
GCA_900056315.1	st2181	95.745	0	0	0	0	0	99.048	0	0	0	0	0	0	0	0	0	0	0	0	1
GCA_900056665.1	st2897	95.745	0	0	0	0	0	0	0	0	0	0	0	0	0	0	0	0	0	0	0
GCA_900056675.1	st3281	95.745	0	0	0	0	0	0	0	0	0	0	0	0	0	0	0	0	0	0	0
GCA_900057105.1	st2654	95.745	0	0	0	0	0	0	0	0	0	0	0	0	0	0	0	0	0	0	0
GCA_900057635.1	st910	95.745	0	0	0	0	0	99.048	0	0	0	0	0	0	0	0	0	0	0	0	1
GCA_900058905.1	st2819	95.745	0	0	0	0	0	98.92	0	0	0	0	0	0	0	0	0	0	0	0	1
GCA_900061095.1	st2901	95.745	0	0	0	0	0	99.048	0	0	0	0	0	0	0	0	0	0	0	0	1
GCA_900061125.1	st2481	95.652	0	0	0	0	0	0	0	0	0	0	0	0	0	0	0	0	0	0	0
GCA_900062125.1	st3125	95.745	0	0	0	0	0	0	0	0	0	0	0	0	0	0	0	0	0	0	0
GCA_900063315.1	st2952	95.745	0	0	0	0	0	0	0	0	0	0	0	0	0	0	0	0	0	0	0
GCA_900063945.1	st2917	95.745	0	0	0	0	0	99.048	0	0	0	0	0	0	0	0	0	0	0	0	1
GCA_900482875.1	EOE139	95.745	0	0	0	0	0	99.048	0	0	0	0	0	0	0	0	0	0	0	0	1
GCA_900482955.1	EOE146	95.745	0	0	0	0	0	99.048	0	0	0	0	0	0	0	0	0	0	0	0	1
GCA_900483005.1	EOE179	95.745	0	0	0	0	0	99.048	0	0	0	0	0	0	0	0	0	0	0	0	1
GCA_900483105.1	EOE156	95.745	0	0	0	0	0	99.048	0	0	0	0	0	0	0	0	0	0	0	0	1
GCA_900483125.1	EOE188	95.745	0	0	0	0	0	99.048	0	0	0	0	0	0	0	0	0	0	0	0	1
GCA_900483175.1	EOE168	95.745	0	0	0	0	0	99.048	0	0	0	0	0	0	0	0	0	0	0	0	1
GCA_900483185.1	EOE172	95.745	0	0	0	0	0	99.048	0	0	0	0	0	0	0	0	0	0	0	0	1
GCA_900483235.1	EOE183	95.745	0	0	0	0	0	99.048	0	0	0	0	0	0	0	0	0	0	0	0	1
GCA_900483325.1	EOE215	95.745	0	0	0	0	0	99.048	0	0	0	0	0	0	0	0	0	0	0	0	1
GCA_900483405.1	EOE194	95.745	0	0	0	0	0	99.048	0	0	0	0	0	0	0	0	0	0	0	0	1
GCA_900483465.1	EOE207	95.745	0	0	0	0	0	99.048	0	0	0	0	0	0	0	0	0	0	0	0	1
GCA_900483475.1	EOE222	95.745	0	0	0	0	0	99.048	0	0	0	0	0	0	0	0	0	0	0	0	1
GCA_900483685.1	EOE232	95.745	0	0	0	0	0	99.048	0	0	0	0	0	0	0	0	0	0	0	0	1
GCA_900483775.1	EOE228	95.745	0	0	0	0	0	99.048	0	0	0	0	0	0	0	0	0	0	0	0	1
GCA_900483815.1	EOE250	95.745	0	0	0	0	0	99.048	0	0	0	0	0	0	0	0	0	0	0	0	1
GCA_900483865.1	EOE245	95.745	0	0	0	0	0	0	0	0	0	0	0	0	0	0	0	0	0	0	0
GCA_900483885.1	EOE221	95.745	0	0	0	0	0	99.048	0	0	0	0	0	0	0	0	0	0	0	0	1
GCA_900483935.1	EOE277	95.745	0	0	0	0	0	99.048	0	0	0	0	0	0	0	0	0	0	0	0	1
GCA_900484255.1	EOE012	95.745	0	0	0	0	0	99.048	0	0	0	0	0	0	0	0	0	0	0	0	1
GCA_900484495.1	EOE040	95.745	0	0	0	0	0	99.048	0	0	0	0	0	0	0	0	0	0	0	0	1
GCA_001225525.1	07-02159	95.863	99.869	0	0	0	0	99.048	0	0	0	0	0	0	0	0	0	0	0	0	2
GCA_001226585.1	09-01245	95.745	0	0	0	0	0	0	0	0	0	0	0	0	0	0	0	0	0	0	0
GCA_001226605.1	07-02901	95.863	0	0	0	99.218	0	0	0	0	0	0	0	0	0	0	0	0	0	0	1
GCA_001226785.1	06-01347	95.745	0	0	0	0	0	0	0	0	0	0	0	0	0	0	0	0	0	0	0
GCA_001227185.1	08-01672	99.9	0	0	0	0	0	0	0	0	0	0	0	0	0	0	0	0	0	0	0
GCA_001227445.1	08-01484	95.745	0	0	0	0	0	99.048	0	0	0	0	0	0	0	0	0	0	0	0	1
GCA_001227645.1	04-02315-1	95.863	0	0	0	0	0	0	0	0	0	0	0	0	0	0	0	0	0	0	0
GCA_001227685.1	1018.07	95.745	100	0	0	0	0	99.048	0	0	0	0	0	0	0	0	0	0	0	0	2
GCA_001227925.1	07-01932	95.863	0	0	0	0	0	0	0	0	0	0	0	0	100	0	0	0	0	0	1
GCA_001228885.1	09-00984	95.745	0	0	0	0	0	99.048	0	0	0	0	0	0	0	0	0	0	0	0	1
GCA_001228925.1	07-02477	95.745	0	0	0	0	0	99.048	0	0	0	0	0	0	0	0	0	0	0	0	1
GCA_001229205.1	AR 0650 784	95.745	0	0	0	0	0	0	0	0	0	0	0	0	0	0	0	0	0	0	0
GCA_001229525.1	07-03351	95.745	0	0	0	0	0	0	0	0	0	0	0	0	0	0	0	0	0	0	0
GCA_001229925.1	09-00980	95.745	0	0	0	0	0	99.048	0	0	0	0	0	0	0	0	0	0	0	0	1
GCA_001230065.1	08-01486	95.745	0	0	0	0	0	99.048	0	0	0	0	0	0	0	0	0	0	0	0	1
GCA_001230665.1	08-01491	96.334	0	0	0	0	0	99.043	0	0	0	0	0	0	0	0	0	0	0	0	1
GCA_001231225.1	08-01671	95.745	0	0	0	0	0	0	0	0	0	0	0	0	0	0	0	0	0	0	0
GCA_001233485.1	99St18131	95.745	0	0	0	0	0	0	0	0	0	0	0	0	0	0	0	0	0	0	0
GCA_001234845.1	09-01249	95.745	0	0	0	0	0	0	0	0	0	0	0	0	0	0	0	0	0	0	0
GCA_001235225.1	07-02988	95.745	0	0	0	0	0	0	0	0	0	0	0	0	0	0	0	0	0	0	0
GCA_001236005.1	A09973/ 97	95.745	0	0	0	0	0	99.048	0	0	0	0	0	0	0	0	0	0	0	0	1
GCA_001236485.1	07-03349	95.745	0	0	0	0	0	99.048	0	0	0	0	0	0	0	0	0	0	0	0	1
GCA_001236565.1	ARI10	95.745	0	0	0	0	0	0	0	0	0	0	0	0	0	0	0	0	0	0	0
GCA_001238005.1	403.02	95.745	0	0	0	0	0	99.048	0	0	0	0	0	0	0	0	0	0	0	0	1
GCA_001238025.1	07-02996	95.745	0	0	0	0	0	99.048	0	0	0	0	0	0	0	0	0	0	0	0	1
GCA_001238145.1	04-03100	95.745	0	0	0	0	0	99.048	0	0	0	0	0	0	0	0	0	0	0	0	1
GCA_001239165.1	07-00309	95.745	0	0	0	0	0	99.048	0	0	0	0	0	0	0	0	0	0	0	0	1
GCA_002097695.1	N13/1/17	95.745	0	0	0	0	0	0	0	0	0	0	0	0	0	0	0	0	0	0	0
GCA_900037805.1	st966	95.745	0	0	0	0	0	99.048	0	0	0	0	0	0	0	0	0	0	0	0	1
GCA_900039735.1	st1257	95.745	0	0	0	0	0	99.048	0	0	0	0	0	0	0	0	0	0	0	0	1
GCA_900040455.1	st1663	95.745	0	0	0	0	0	99.048	0	0	0	0	0	0	0	0	0	0	0	0	1
GCA_900045085.1	st1670	95.745	0	0	0	0	0	99.048	0	0	0	0	0	0	0	0	0	0	0	0	1
GCA_900046415.1	st2190	95.745	0	0	0	0	0	99.048	0	0	0	0	0	0	0	0	0	0	0	0	1
GCA_900048365.1	st2471	95.745	0	0	0	0	0	99.048	0	0	0	0	0	0	0	0	0	0	0	0	1
GCA_900048655.1	st904	95.745	0	0	0	0	0	0	0	0	0	0	0	0	0	0	0	0	0	0	0
GCA_900061105.1	st2456	95.745	0	0	0	0	0	0	0	0	0	0	0	0	0	0	0	0	0	0	0
GCA_900250605.1	H1629	95.745	0	0	0	0	0	0	0	0	0	0	0	0	0	0	0	0	0	0	0
GCA_900251155.1	M3074	95.745	0	0	0	0	0	99.048	0	0	0	0	0	0	0	0	0	0	0	0	1
GCA_900251175.1	M3089	97.991	0	0	0	0	0	0	0	0	0	0	0	0	0	0	0	0	0	0	0
GCA_900251565.1	M3684	95.745	0	0	0	0	0	0	0	0	0	0	0	0	0	0	0	0	0	0	0
GCA_000934185.1	71A_S11	95.863	0	0	0	0	0	0	0	0	0	0	0	0	0	0	0	0	0	0	0
GCA_000572225.1	AMRF1	95.863	99.869	0	0	0	0	99.048	0	0	0	0	0	0	0	0	0	0	0	0	2
GCA_002849265.1	17	95.863	0	0	0	0	0	0	0	0	0	0	0	0	0	0	0	0	0	0	0
GCA_003194405.1	CHU15-056	99.95	0	0	0	0	0	0	0	0	0	0	0	0	0	0	0	0	0	0	0
GCA_900017775.1	NZAK3	95.508	0	0	0	100	0	0	0	0	0	0	0	0	0	0	0	0	0	0	1
GCA_900620225.1	BPH2819	97.991	0	0	0	0	0	0	0	0	0	0	0	0	0	0	0	0	0	0	0
GCA_000360625.1	M0273	97.754	99.869	0	0	0	0	100	0	0	0	0	0	0	0	0	0	0	0	0	2
GCA_000360805.1	M0330	97.991	99.869	0	0	0	0	100	0	0	0	0	0	0	0	0	0	0	0	0	2
GCA_000362305.1	M0953	97.991	99.869	0	0	0	0	100	0	0	0	0	0	0	0	0	0	0	0	0	2
GCA_000362385.1	M0998	97.991	99.869	0	0	0	0	100	0	0	0	0	0	0	0	0	0	0	0	0	2
GCA_000362405.1	M0999	97.991	99.869	0	0	0	0	100	0	0	0	0	0	0	0	0	0	0	0	0	2
GCA_000362705.1	M1083	97.991	99.869	0	0	0	0	100	0	0	0	0	0	0	0	0	0	0	0	0	2
GCA_000362865.1	M1142	97.991	99.869	0	0	0	0	100	0	0	0	0	0	0	0	0	0	0	0	0	2
GCA_000362945.1	M1198	97.991	99.869	0	0	0	0	100	0	0	0	0	0	0	0	0	0	0	0	0	2
GCA_000363105.1	M1248	99.95	99.869	0	0	0	0	100	0	0	0	0	0	0	0	0	0	0	0	0	2
GCA_000363485.1	M1405	97.754	99.869	0	0	0	0	100	0	0	0	0	0	0	0	0	0	0	0	0	2
GCA_000364065.1	M1078	97.991	99.869	0	0	0	0	100	0	0	0	0	0	0	0	0	0	0	0	0	2
GCA_000525245.1	DAR3165	98.463	0	0	0	0	0	0	0	0	0	0	0	0	0	0	0	0	0	0	0
GCA_000528395.1	M0682	99.95	99.869	0	0	0	0	100	0	0	0	0	0	0	0	0	0	0	0	0	2
GCA_000530515.1	M0243	99.95	99.869	0	0	0	0	100	0	0	0	0	0	0	0	0	0	0	0	0	2
GCA_000531735.1	M0078	99.95	99.869	0	0	0	0	100	0	0	0	0	0	0	0	0	0	0	0	0	2
GCA_000532275.1	M1001	97.991	99.869	0	0	0	0	100	0	0	0	0	0	0	0	0	0	0	0	0	2
GCA_000532995.1	M1300	97.991	99.869	0	0	0	0	100	0	0	0	0	0	0	0	0	0	0	0	0	2
GCA_000533055.1	M1475	99.95	99.869	0	0	0	0	100	0	0	0	0	0	0	0	0	0	0	0	0	2
GCA_000539555.1	SMMC6037	97.991	99.869	0	0	0	0	100	0	0	0	0	0	0	0	0	0	0	0	0	2
GCA_000540875.1	SJOS6125	97.991	99.869	0	0	0	0	100	0	0	0	0	0	0	0	0	0	0	0	0	2
GCA_000541335.1	SJOS6144	97.991	100	0	0	0	0	100	0	0	0	0	0	0	0	0	0	0	0	0	2
GCA_000541935.1	SCLE6032	97.991	100	0	0	0	0	100	0	0	0	0	0	0	0	0	0	0	0	0	2
GCA_000542215.1	MISS6092	97.991	99.869	0	0	0	0	100	0	0	0	0	0	0	0	0	0	0	0	0	2
GCA_000542415.1	LAMC6106	97.875	99.869	0	0	0	0	100	0	0	0	0	0	0	0	0	0	0	0	0	2
GCA_000544125.1	M0819	97.991	99.869	0	0	0	0	100	0	0	0	0	0	0	0	0	0	0	0	0	2
GCA_000544185.1	M0824	97.754	99.869	0	0	0	0	100	0	0	0	0	0	0	0	0	0	0	0	0	2
GCA_000544325.1	M0838	97.872	99.869	0	0	0	0	100	0	0	0	0	0	0	0	0	0	0	0	0	2
GCA_000544825.1	M0880	97.991	99.869	0	0	0	0	100	0	0	0	0	0	0	0	0	0	0	0	0	2
GCA_000545105.1	M0902	97.754	99.869	0	0	0	0	100	0	0	0	0	0	0	0	0	0	0	0	0	2
GCA_000545265.1	M0914	97.754	99.874	0	0	0	0	100	0	0	0	0	0	0	0	0	0	0	0	0	2
GCA_000545365.1	M0920	99.95	99.869	0	0	0	0	100	0	0	0	0	0	0	0	0	0	0	0	0	2
GCA_000545485.1	M0931	97.991	99.869	0	0	0	0	0	0	0	0	0	0	0	0	0	0	0	0	0	1
GCA_000545825.1	M0961	99.95	99.869	0	0	0	0	98.978	0	0	0	0	0	0	0	0	0	0	0	0	2
GCA_000546165.1	M0988	97.754	99.869	0	0	0	0	99.048	0	0	0	0	0	0	0	0	0	0	0	0	2
GCA_000546945.1	M1069	99.95	99.869	0	0	0	0	0	0	0	0	0	0	0	0	0	0	0	0	0	1
GCA_000547025.1	M1079	97.991	99.869	0	0	0	0	0	0	0	0	0	0	0	0	0	0	0	0	0	1
GCA_000547265.1	M1096	99.95	99.869	0	0	0	0	0	0	0	0	0	0	0	0	0	0	0	0	0	1
GCA_000547565.1	M1577	99.95	99.869	0	0	0	0	99.048	0	0	0	0	0	0	0	0	0	0	0	0	2
GCA_000547925.1	M1366	99.95	99.869	0	0	0	0	0	0	0	0	0	0	0	0	0	0	0	0	0	1
GCA_000548045.1	M1378	99.95	99.869	0	0	0	0	0	0	0	0	0	0	0	0	0	0	0	0	0	1
GCA_000548705.1	M1425	99.95	99.869	0	0	0	0	0	0	0	0	0	0	0	0	0	0	0	0	0	1
GCA_000548745.1	M1429	97.754	99.869	0	0	0	0	99.048	0	0	0	0	0	0	0	0	0	0	0	0	2
GCA_000549145.1	M1454	97.754	99.869	0	0	0	0	0	0	0	0	0	0	0	0	0	0	0	0	0	1
GCA_000549405.1	M1471	99.95	99.869	0	0	0	0	100	0	0	0	0	0	0	0	0	0	0	0	0	2
GCA_000549725.1	M1360	99.95	99.869	0	0	0	0	0	0	0	0	0	0	0	0	0	0	0	0	0	1
GCA_000549745.1	M1361	99.95	99.869	0	0	0	0	100	0	0	0	0	0	0	0	0	0	0	0	0	2
GCA_000550185.1	M1508	97.991	99.867	0	0	0	0	100	0	0	0	0	0	0	0	0	0	0	0	0	2
GCA_000551765.1	M0076	97.991	99.869	0	0	0	0	100	0	0	0	0	0	0	0	0	0	0	0	0	2
GCA_000552025.1	M0095	97.991	99.869	0	0	0	0	100	0	0	0	0	0	0	0	0	0	0	0	0	2
GCA_000552665.1	M0141	99.95	99.874	0	0	0	0	98.978	0	0	0	0	0	0	0	0	0	0	0	0	2
GCA_000552805.1	M0149	99.95	99.869	0	0	0	0	100	0	0	0	0	0	0	0	0	0	0	0	0	2
GCA_000553285.1	M0184	97.754	99.869	0	0	0	0	100	0	0	0	0	0	0	0	0	0	0	0	0	2
GCA_000553925.1	M0255	97.991	99.869	0	0	0	0	100	0	0	0	0	0	0	0	0	0	0	0	0	2
GCA_000554105.1	M0275	97.991	99.869	0	0	0	0	100	0	0	0	0	0	0	0	0	0	0	0	0	2
GCA_000554185.1	M0283	99.95	100	0	0	0	0	100	0	0	0	0	0	0	0	0	0	0	0	0	2
GCA_000554425.1	M0301	99.95	99.869	0	0	0	0	100	0	0	0	0	0	0	0	0	0	0	0	0	2
GCA_000554925.1	M0341	97.872	99.869	0	0	0	0	100	0	0	0	0	0	0	0	0	0	0	0	0	2
GCA_000554945.1	M0342	97.991	99.869	0	0	0	0	100	0	0	0	0	0	0	0	0	0	0	0	0	2
GCA_000555105.1	M0356	99.95	99.869	0	0	0	0	100	0	0	0	0	0	0	0	0	0	0	0	0	2
GCA_000556325.1	M0462	99.95	99.869	0	0	0	0	100	0	0	0	0	0	0	0	0	0	0	0	0	2
GCA_000556545.1	M0481	97.991	99.869	0	0	0	0	100	0	0	0	0	0	0	0	0	0	0	0	0	2
GCA_000556665.1	M0490	99.95	99.869	0	0	0	0	100	0	0	0	0	0	0	0	0	0	0	0	0	2
GCA_000556865.1	M0514	99.95	99.869	0	0	0	0	100	0	0	0	0	0	0	0	0	0	0	0	0	2
GCA_000557745.1	M0583	99.95	99.869	0	0	0	0	100	0	0	0	0	0	0	0	0	0	0	0	0	2
GCA_000559745.1	W41914	99.95	99.869	0	0	0	0	100	0	0	0	0	0	0	0	0	0	0	0	0	2
GCA_000560025.1	F16077	99.95	100	0	0	0	0	100	0	0	0	0	0	0	0	0	0	0	0	0	2
GCA_000563155.1	F66300	99.95	100	0	0	0	0	100	0	0	0	0	0	0	0	0	0	0	0	0	2
GCA_000563715.1	H77102	99.95	99.869	0	0	0	0	100	0	0	0	0	0	0	0	0	0	0	0	0	2
GCA_000569135.1	W50101	99.95	99.738	0	0	0	0	100	0	0	0	0	0	0	0	0	0	0	0	0	2
GCA_000569755.1	M87641	97.991	99.869	0	0	0	0	100	0	0	0	0	0	0	0	0	0	0	0	0	2
GCA_000570315.1	F43199	97.991	99.738	0	0	0	0	100	0	0	0	0	0	0	0	0	0	0	0	0	2
GCA_000571235.1	H68252	97.991	99.869	0	0	0	0	100	0	0	0	0	0	0	0	0	0	0	0	0	2
GCA_000573165.1	M1331	99.95	99.869	0	0	0	0	100	0	0	0	0	0	0	0	0	0	0	0	0	2
GCA_000574285.1	M1250	97.872	99.869	0	0	0	0	100	0	0	0	0	0	0	0	0	0	0	0	0	2
GCA_000574305.1	M1249	97.872	99.869	0	0	0	0	100	0	0	0	0	0	0	0	0	0	0	0	0	2
GCA_000574965.1	M1201	97.872	99.869	0	0	0	0	100	0	0	0	0	0	0	0	0	0	0	0	0	2
GCA_000575045.1	M1192	99.95	99.869	0	0	0	0	100	0	0	0	0	0	0	0	0	0	0	0	0	2
GCA_000575345.1	M1162	99.95	99.869	0	0	0	0	100	0	0	0	0	0	0	0	0	0	0	0	0	2
GCA_000577405.1	F53404	99.95	99.869	0	0	0	0	100	0	0	0	0	0	0	0	0	0	0	0	0	2
GCA_000579195.1	F16106	98.818	99.869	0	0	0	0	100	0	0	0	0	0	0	0	0	0	0	0	0	2
GCA_000579295.1	F85691	97.991	99.869	0	0	0	0	100	0	0	0	0	0	0	0	0	0	0	0	0	2
GCA_000606145.1	F23585	97.991	99.869	0	0	0	0	100	0	0	0	0	0	0	0	0	0	0	0	0	2
GCA_000607505.1	DAR3567	99.95	99.869	0	0	0	0	100	0	0	0	0	0	0	0	0	0	0	0	0	2
GCA_000607525.1	DAR3574	97.991	99.869	0	0	0	0	100	0	0	0	0	0	0	0	0	0	0	0	0	2
GCA_000607625.1	DAR3583	97.991	99.869	0	0	0	0	100	0	0	0	0	0	0	0	0	0	0	0	0	2
GCA_000607745.1	DAR3592	97.991	99.869	0	0	0	0	100	0	0	0	0	0	0	0	0	0	0	0	0	2
GCA_000607985.1	DAR3629	99.95	0	0	0	0	0	0	0	0	0	0	0	0	0	0	0	0	0	0	0
GCA_000608665.1	DAR3892	97.991	99.869	0	0	0	0	100	0	0	0	0	0	0	0	0	0	0	0	0	2
GCA_000609505.1	DAR1310	97.991	99.869	0	0	0	0	100	0	0	0	0	0	0	0	0	0	0	0	0	2
GCA_000609765.1	DAR1813	0	0	0	0	0	0	0	0	0	0	0	0	0	0	0	0	0	0	0	0
GCA_000609985.1	DAR1936	97.875	99.869	0	0	0	0	100	0	0	0	0	0	0	0	0	0	0	0	0	2
GCA_000610265.1	DAR2018	97.991	99.869	0	0	0	0	100	0	0	0	0	0	0	0	0	0	0	0	0	2
GCA_000610565.1	DAR3162	98.463	0	0	0	0	0	0	0	0	0	0	0	0	0	0	0	0	0	0	0
GCA_000610645.1	DAR3176	0	0	0	0	0	0	0	0	0	0	0	0	0	0	0	0	0	0	0	0
GCA_000610665.1	DAR3177	97.991	0	0	0	0	0	0	0	0	0	0	0	0	0	0	0	0	0	0	0
GCA_002274295.1	UCI 6	97.991	99.869	0	0	0	0	0	0	0	0	0	0	0	0	0	0	0	0	0	1
GCA_002274335.1	UCI 8	97.991	99.869	0	0	0	0	0	0	0	0	0	0	0	0	0	0	0	0	0	1
GCA_002275755.1	UCI 39	99.95	99.869	0	0	0	0	100	0	0	0	0	0	0	0	0	0	0	0	0	2
GCA_000247275.2	IS-3	97.991	99.869	0	0	0	0	100	0	0	0	0	0	0	0	0	0	0	0	0	2
GCA_000390205.1	06BA18369	98.463	0	0	0	100	0	0	0	0	0	0	0	0	0	0	0	0	0	0	1
GCA_000527475.1	M0710	99.95	100	0	0	0	0	100	0	0	0	0	0	0	0	0	0	0	0	0	2
GCA_000533275.1	M0056	97.991	99.869	0	0	0	0	100	0	0	0	0	0	0	0	0	0	0	0	0	2
GCA_000533455.1	M0180	99.95	99.869	0	0	0	0	100	0	0	0	0	0	0	0	0	0	0	0	0	2
GCA_000533695.1	M0358	99.95	99.869	0	0	0	0	100	0	0	0	0	0	0	0	0	0	0	0	0	2
GCA_000533855.1	M0434	99.95	99.869	0	0	0	0	100	0	0	0	0	0	0	0	0	0	0	0	0	2
GCA_000535235.1	M0921	97.754	99.869	0	0	0	0	100	0	0	0	0	0	0	0	0	0	0	0	0	2
GCA_000535295.1	M0949	99.95	99.869	0	0	0	0	100	0	0	0	0	0	0	0	0	0	0	0	0	2
GCA_000535455.1	M1018	99.95	99.869	0	0	0	0	100	0	0	0	0	0	0	0	0	0	0	0	0	2
GCA_000535535.1	M1039	99.95	99.869	0	0	0	0	100	0	0	0	0	0	0	0	0	0	0	0	0	2
GCA_000535855.1	M1368	99.95	99.869	0	0	0	0	100	0	0	0	0	0	0	0	0	0	0	0	0	2
GCA_000536015.1	M1473	97.754	99.869	0	0	0	0	100	0	0	0	0	0	0	0	0	0	0	0	0	2
GCA_000536435.1	M0805	99.95	99.869	0	0	0	0	100	0	0	0	0	0	0	0	0	0	0	0	0	2
GCA_000592805.1	M1306	97.991	100	0	0	0	0	100	0	0	0	0	0	0	0	0	0	0	0	0	2
GCA_000592885.1	M1251	99.95	99.869	0	0	0	0	100	0	0	0	0	0	0	0	0	0	0	0	0	2
GCA_000594985.1	DAR104	97.991	0	0	0	0	0	0	0	0	0	0	0	0	0	0	0	0	0	0	0
GCA_000595205.1	DAR5798	99.409	99.93	0	0	0	0	99.048	0	0	97.685	0	0	0	100	0	0	0	0	0	4
GCA_000596485.1	DAR3507	97.991	99.869	0	0	0	0	100	0	0	0	0	0	0	0	0	0	0	0	0	2
GCA_000597045.1	T12849	97.991	99.869	0	0	0	0	100	0	0	0	0	0	0	0	0	0	0	0	0	2
GCA_000601945.1	F87602	99.95	99.869	0	0	0	0	0	0	0	0	0	0	0	0	0	0	0	0	0	1
GCA_000602465.1	H81898	97.766	99.869	0	0	0	0	100	0	0	0	0	0	0	0	0	0	0	0	0	2
GCA_001297285.1	BU_W7A_t11	99.173	0	0	0	0	0	0	0	0	0	0	0	0	0	0	0	0	0	0	0
GCA_002260385.1	UG258	97.754	99.869	0	0	0	0	100	0	0	0	0	0	0	0	0	0	0	0	0	2
GCA_002734405.1	C4	0	99.869	0	0	0	0	100	0	0	0	0	0	0	0	0	0	0	0	0	2
GCA_003038745.1	SAM-7	0	0	0	0	0	0	0	0	0	0	0	0	0	0	0	0	0	0	0	0
GCA_003238075.1	CM131	97.991	0	0	0	0	0	0	0	0	0	0	0	0	0	0	0	0	0	0	0
GCA_003239585.1	CM63	99.95	99.738	0	0	0	0	100	0	0	0	0	0	0	98.229	0	0	0	0	0	3
GCA_003260465.1	AR_0227	97.991	99.869	0	0	0	0	100	0	0	0	0	0	0	0	0	0	0	0	0	2
GCA_003421405.1	M6K030	97.991	0	0	0	0	0	0	0	0	0	0	0	0	0	0	0	0	0	0	0
GCA_003719905.1	CFBR-171	97.991	99.874	0	0	0	0	98.978	0	0	0	0	0	0	0	0	0	0	0	0	2
GCA_003719965.1	CFBR-178	99.95	99.869	0	0	0	0	100	0	0	0	0	0	0	0	0	0	0	0	0	2
GCA_003720015.1	CFBR-150	99.95	99.869	0	0	0	0	100	0	0	0	0	0	0	0	0	0	0	0	0	2
GCA_003720115.1	CFBR-102	0	100	0	0	0	0	100	0	0	0	0	0	0	0	0	0	0	0	0	2
GCA_003720355.1	CFBR-122	0	100	0	0	0	0	100	0	0	0	0	0	0	0	0	0	0	0	0	2
GCA_003721075.1	BCH-SA-06	99.95	99.869	0	0	0	0	100	0	0	0	0	0	0	0	0	0	0	0	0	2
GCA_004328105.1	SCPM-O-B-8479	97.991	0	0	0	0	0	0	0	0	0	0	0	0	0	0	0	0	0	0	0
GCA_900051355.1	st1062	97.991	0	0	0	0	0	0	0	0	0	0	0	0	0	0	0	0	0	0	0
GCA_900054705.1	st2761	99.9	0	0	0	99.218	0	0	0	0	0	0	0	0	0	0	0	0	0	0	1
GCA_900124915.1	3688STDY6125000	99.409	0	0	0	0	0	0	0	0	0	0	0	0	100	0	0	0	0	0	1
GCA_900127725.1	3688STDY6125002	99.409	0	0	0	0	0	0	0	0	0	0	0	0	0	0	0	0	0	0	0
GCA_900149265.1	tirS_MRSA4	97.991	100	0	0	99.218	0	0	0	0	0	0	0	0	0	0	0	0	0	0	2
GCA_900458155.1	NCTC10656	97.991	0	0	0	0	0	0	0	0	0	0	0	0	0	0	0	0	0	0	0
GCA_001065355.1	54_SAUR	0	0	0	0	0	0	0	0	0	0	0	0	0	0	0	0	0	0	0	0
GCA_002120685.1	CFSA368	99.95	99.869	0	0	0	0	100	0	0	0	0	0	0	0	0	0	0	0	0	2
GCA_002122295.1	CFSA347	99.95	99.869	0	0	0	0	100	0	0	0	0	0	0	0	0	0	0	0	0	2
GCA_002123035.1	CFSA218	97.991	99.869	0	0	0	0	100	0	0	0	0	0	0	0	0	0	0	0	0	2
GCA_002123235.1	CFSA206	99.95	99.869	0	0	0	0	100	0	0	0	0	0	0	0	0	0	0	0	0	2
GCA_002123745.1	CFSA145	97.991	99.869	0	0	0	0	100	0	0	0	0	0	0	0	0	0	0	0	0	2
GCA_002125105.1	CFSA107	99.851	99.869	0	0	0	0	100	0	0	0	0	0	0	0	0	0	0	0	0	2
GCA_002125835.1	CFSA016	99.95	99.869	0	0	0	0	100	0	0	0	0	0	0	0	0	0	0	0	0	2
GCA_002126445.1	CFSA072	99.95	99.869	0	0	0	0	100	0	0	0	0	0	0	0	0	0	0	0	0	2
GCA_002126925.1	c58	97.991	0	0	0	0	0	0	0	0	0	0	0	0	0	0	0	0	0	0	0
GCA_003421985.1	M6K094	95.508	0	0	0	0	0	99.048	0	0	0	0	0	0	0	0	0	0	0	0	1
GCA_003857135.1	C1636	95.981	0	0	0	0	0	0	0	0	0	0	0	0	0	0	0	0	0	0	0
GCA_005861535.1	YNSA31	0	0	0	0	0	0	0	0	0	0	0	0	0	0	0	0	0	0	0	0
GCA_006496695.1	AOUC-0915	99.95	99.738	0	0	0	0	100	0	100	100	0	0	0	98.229	0	0	0	0	0	5
GCA_000638455.1	C0630	95.981	99.78	0	0	0	0	0	0	0	0	0	0	0	100	0	0	0	0	0	2
GCA_000638735.1	C3489	0	0	0	0	0	0	0	0	0	0	0	0	0	0	0	0	0	0	0	0
GCA_000639615.1	R0294	0	0	0	0	0	0	0	0	0	0	0	0	0	0	0	0	0	0	0	0
GCA_000639655.1	R0357	0	0	0	0	0	0	0	0	0	0	0	0	0	0	0	0	0	0	0	0
GCA_000252405.2	DR10	95.745	0	0	0	0	0	0	0	0	0	0	0	0	0	0	0	0	0	0	0
GCA_000682915.1	VET1907R	95.981	0	0	0	0	0	0	0	0	0	0	0	0	100	0	0	0	0	0	1

## Sheet: HA-ardApositives
Supplementary File S2. Assessment of resistance-associated genes acquired by horizontal transfer in the genomes carrying ardA-H1, ardA-H2, and in those lacking these genes using ResFinder 3.0.	Strain	beta-lactam	aminoglycoside	colistin	fosfomycin	fusidicacid	glycopeptide	macrolide	nitroimidazole	oxazolidinone	phenicol	quinolone	rifampicin	sulphonamide	tetracycline	trimethoprim	ardA-H2	ardA-H1	Tn916	Tn5801	Resistance without bl
GCA_900038365.1	st554	98.463	100	0	0	0	0	100	0	0	0	0	0	0	96.188	100	0	100	0	99.82	4
GCA_000027045.1	TW20	98.345	99.874	0	0	0	0	100	0	0	0	0	0	0	97.708	100	0	100	0	99.98	4
GCA_000145595.1	JKD6008	98.463	100	0	0	0	0	99.863	0	0	0	0	0	0	97.708	0	0	100	0	99.968	3
GCA_000204665.1	T0131	98.227	100	0	0	0	0	99.863	0	0	0	0	0	0	97.708	0	0	100	0	99.965	3
GCA_000418345.1	Bmb9393	98.463	99.78	0	0	0	0	100	0	0	100	0	0	0	97.656	0	0	100	0	100	4
GCA_000485885.1	Z172	98.463	99.874	0	0	0	0	100	0	0	0	0	0	0	97.708	100	0	100	0	99.967	4
GCA_000709475.1	XN108	98.345	99.874	0	0	0	0	100	0	0	0	0	0	0	97.656	100	0	100	0	99.948	4
GCA_000769575.1	Gv69	98.345	99.78	0	0	0	0	100	0	0	0	0	0	0	97.656	0	0	100	0	99.986	3
GCA_001515665.1	Gv51	98.463	99.78	0	0	0	0	100	0	0	100	0	0	0	97.708	0	0	100	0	99.986	4
GCA_001515685.1	Be62	98.463	99.78	0	0	0	0	100	0	0	100	0	0	0	97.656	0	0	100	0	99.982	4
GCA_001515705.1	Gv88	98.463	99.78	0	0	0	0	100	0	0	100	0	0	0	97.708	0	0	100	0	99.986	4
GCA_001515745.1	HC1340	98.463	99.78	0	0	0	0	100	0	0	0	0	0	0	97.656	0	0	100	0	99.986	3
GCA_001515765.1	HC1335	98.463	99.78	0	0	0	0	100	0	0	0	0	0	0	97.708	0	0	100	0	99.943	3
GCA_001641025.1	V521	98.463	99.874	0	0	0	0	100	0	0	0	0	0	0	97.708	100	0	100	0	99.98	4
GCA_002097595.2	M92	98.463	99.874	0	0	0	0	99.863	0	0	0	0	0	0	97.708	0	0	100	0	99.982	3
GCA_002895385.1	MRSA107	98.463	99.874	0	0	0	0	100	0	0	0	0	0	0	97.708	100	0	100	0	99.974	4
GCA_003264775.1	CMRSA-3	98.463	99.872	0	0	0	0	100	0	0	0	0	0	0	97.708	100	0	100	0	99.972	4
GCA_003264815.1	CMRSA-6	98.463	99.874	0	0	0	0	100	0	0	0	0	0	0	97.708	100	0	100	0	99.98	4
GCA_003394105.1	WCH-SK2	98.463	100	0	0	0	0	99.863	0	0	0	0	0	0	97.708	0	0	100	0	99.972	3
GCA_004136255.1	M48	98.463	99.874	0	0	0	0	100	0	0	0	0	0	0	97.708	100	0	100	0	99.98	4
GCA_005890015.1	JKD6004	98.463	99.872	0	0	0	0	99.863	0	0	0	0	0	0	97.708	0	0	100	0	99.972	3
GCA_900474575.1	NCTC9944	98.463	100	0	0	0	0	100	0	0	0	0	0	0	97.708	100	0	100	0	99.982	4
GCA_900475055.1	NCTC11940	98.463	99.872	0	0	0	0	99.863	0	0	0	0	0	0	97.708	0	0	100	0	99.975	3
GCA_900607245.1	JKD6009	98.463	100	0	0	0	0	99.863	0	0	0	0	0	0	97.708	0	0	100	0	99.968	3
GCA_900607255.1	BPH2019	98.463	100	0	0	0	0	99.863	0	0	0	0	0	0	97.708	0	0	100	0	99.972	3
GCA_900607265.1	BPH2003	98.463	99.874	0	0	0	0	100	0	0	0	0	0	0	97.708	100	0	100	0	99.98	4
GCA_900607275.1	BPH2070	98.463	100	0	0	0	0	99.863	0	0	0	0	0	0	97.656	0	0	100	0	99.961	3
GCA_900607285.1	BPH3244	98.463	100	0	0	0	0	99.863	0	0	0	0	0	0	97.708	0	0	100	0	99.968	3
GCA_900607295.1	BPH2869	98.463	100	0	0	0	0	99.863	0	0	0	0	0	0	97.708	0	0	100	0	99.972	3
GCA_900607305.1	BPH2056	98.463	99.874	0	0	0	0	99.863	0	0	0	0	0	0	97.708	0	0	100	0	99.975	3
GCA_900620245.1	BPH2947	98.463	99.874	0	0	0	0	100	0	0	0	0	0	0	97.708	100	0	100	0	99.961	4
GCA_002407105.1	NMR08	98.463	99.874	0	0	0	0	100	0	0	0	0	0	0	97.708	0	0	100	0	99.961	3
GCA_000146385.1	ATCC BAA-39	98.463	100	0	0	0	0	100	0	0	0	0	0	0	97.708	0	0	100	0	99.982	3
GCA_000537975.1	SJOS6053	99.801	99.874	0	0	0	0	100	0	0	0	0	0	0	97.708	100	0	100	0	99.98	4
GCA_000538115.1	SJOS6072	98.463	99.874	0	0	0	0	100	0	0	0	0	0	0	97.708	100	0	100	0	0	4
GCA_000539175.1	FVRH6002	98.463	99.874	0	0	0	0	100	0	0	0	0	0	0	97.656	100	0	100	0	99.98	4
GCA_000539775.1	LAMC0011	99.801	99.874	0	0	0	0	100	0	0	0	0	0	0	97.708	100	0	100	0	0	4
GCA_000540375.1	UCIM6042	99.801	99.874	0	0	0	0	100	0	0	0	0	0	0	97.708	100	0	100	0	99.98	4
GCA_000542435.1	WAMC6102	98.463	99.874	0	0	0	0	100	0	0	0	0	0	0	97.708	100	0	100	0	99.98	4
GCA_000543345.1	KINW6048	98.463	99.874	0	0	0	0	100	0	0	0	0	0	0	97.708	100	0	100	0	99.974	4
GCA_000172855.1	JKD6009	98.463	100	0	0	0	0	99.863	0	0	0	0	0	0	97.708	0	0	100	0	99.968	3
GCA_000208695.1	16K	98.345	99.93	0	0	0	0	0	0	0	99.846	0	0	0	97.708	0	0	100	0	0	3
GCA_000239635.2	21178	98.463	99.874	0	0	0	0	100	0	0	100	0	0	0	97.708	100	0	100	0	99.982	5
GCA_000259995.1	IS-125	98.345	99.67	0	0	0	0	100	0	0	0	0	0	0	97.656	0	0	100	0	0	3
GCA_000260015.1	IS-157	98.345	99.67	0	0	0	0	100	0	0	0	0	0	0	97.708	0	0	100	0	0	3
GCA_000260055.1	IS-189	98.463	99.874	0	0	0	0	100	0	0	98.457	0	0	0	97.708	100	0	100	0	0	5
GCA_000313005.1	PPUKM-775-2009	98.463	99.874	0	0	0	0	100	0	0	0	0	0	0	97.708	100	0	100	0	99.961	4
GCA_000313595.1	CN79	98.345	0	0	0	0	0	0	0	0	0	0	0	0	97.708	0	0	100	0	99.961	1
GCA_000401475.1	MRGR3	98.463	99.874	0	0	0	0	100	0	0	0	0	0	0	97.708	0	0	100	0	99.986	3
GCA_000537615.1	UCIM6015	98.463	99.874	0	0	0	0	100	0	0	0	0	0	0	97.708	100	0	100	0	99.98	4
GCA_000685335.1	HST-077	98.463	99.874	0	0	0	0	100	0	0	0	0	0	0	97.708	100	0	100	0	0	4
GCA_000732805.1	CUHK_BJ2002	98.227	99.93	0	0	0	0	0	0	0	0	0	0	0	97.708	0	0	100	0	99.961	2
GCA_000732815.1	CUHK_BJ2007	98.345	99.93	0	0	0	0	99.048	0	0	0	0	0	0	97.708	0	0	100	0	99.965	3
GCA_000732825.1	CUHK_HK1997	98.463	99.874	0	0	0	0	100	0	0	0	0	0	0	97.708	0	0	100	0	99.982	3
GCA_000732835.1	CUHK_HK2007	98.463	99.874	0	0	0	0	100	0	0	0	0	0	0	97.708	100	0	100	0	99.961	4
GCA_000784385.1	MRSA_PR1	98.463	100	0	0	0	0	100	0	0	0	0	0	0	97.708	100	0	100	0	99.98	4
GCA_000787025.1	346	98.463	99.93	0	0	0	0	100	0	0	93.827	0	0	0	97.708	100	0	100	0	99.98	5
GCA_000974385.1	OC3	98.463	100	0	0	0	0	100	0	0	100	0	0	0	97.708	0	0	100	0	0	4
GCA_001018635.2	FDAARGOS_3	98.463	99.78	0	0	0	0	99.863	0	0	0	0	0	0	97.708	0	0	100	0	99.982	3
GCA_001047755.1	M170	98.463	99.874	0	0	0	0	100	0	0	0	0	0	0	97.708	100	0	100	0	99.975	4
GCA_001062275.1	1195_SAUR	98.463	99.874	0	0	0	0	100	0	0	0	0	0	0	97.708	100	0	100	0	0	4
GCA_001184285.2	V808	98.463	99.874	0	0	0	0	100	0	0	0	0	0	0	97.708	100	0	100	0	99.98	4
GCA_001223825.1	HU8	98.345	99.93	0	0	0	0	100	0	0	0	0	0	0	97.708	0	0	100	0	99.965	3
GCA_001224305.1	IU17	98.345	99.93	0	0	0	0	99.048	0	0	0	0	0	0	97.708	0	0	100	0	99.961	3
GCA_001224505.1	DEU15	98.345	99.93	0	0	0	0	0	0	0	0	0	0	0	97.708	0	0	100	0	99.968	2
GCA_001224565.1	MU4	98.345	100	0	0	0	0	99.048	0	0	0	0	0	0	97.708	0	0	100	0	99.961	3
GCA_001224705.1	IU13	98.345	99.93	0	0	0	0	100	0	0	0	0	0	0	97.708	0	0	100	0	99.968	3
GCA_001224725.1	NA32	98.463	99.872	0	0	0	0	100	0	0	0	0	0	0	97.708	0	0	100	0	99.982	3
GCA_001224785.1	HU15	98.345	99.93	0	0	0	0	0	0	0	0	0	0	0	97.708	0	0	100	0	99.954	2
GCA_001224885.1	M418	98.463	99.874	0	0	0	0	100	0	0	0	0	0	0	97.708	0	0	100	0	99.968	3
GCA_001225125.1	MU1	98.345	99.791	0	0	0	0	100	0	0	0	0	0	0	97.708	0	0	100	0	99.965	3
GCA_001225305.1	IU18	98.345	99.93	0	0	0	0	0	0	0	0	0	0	0	97.708	0	0	100	0	99.964	2
GCA_001226265.1	P32	98.463	99.874	0	0	0	0	100	0	0	0	0	0	0	97.708	0	0	100	0	99.968	3
GCA_001226525.1	MAL11	98.463	99.874	0	0	0	0	100	0	0	0	0	0	0	97.708	0	0	100	0	99.982	3
GCA_001226625.1	DEU3	98.345	99.93	0	0	0	0	100	0	0	0	0	0	0	97.708	0	0	100	0	99.961	3
GCA_001226645.1	HU23	98.345	99.93	0	0	0	0	0	0	0	0	0	0	0	97.708	0	0	100	0	99.961	2
GCA_001226905.1	LIT68	98.463	100	0	0	0	0	100	0	0	100	0	0	0	97.708	0	0	100	0	99.986	4
GCA_001227005.1	DEU20	98.345	99.93	0	0	0	0	0	0	0	0	0	0	0	97.708	0	0	100	0	99.968	2
GCA_001227505.1	MU5	98.345	99.93	0	0	0	0	0	0	0	0	0	0	0	97.708	0	0	100	0	99.965	2
GCA_001227545.1	D90	98.463	99.872	0	0	0	0	100	0	0	100	0	0	0	97.708	100	0	100	0	99.982	5
GCA_001227565.1	HU16	98.345	99.93	0	0	0	0	100	0	0	0	0	0	0	97.708	0	0	100	0	99.965	3
GCA_001227825.1	FRICAR	98.463	99.78	0	0	0	0	100	0	0	0	0	0	0	97.708	0	0	100	0	99.993	3
GCA_001228045.1	MAL1	98.463	99.874	0	0	0	0	100	0	0	99.081	0	0	0	97.708	100	0	100	0	99.98	5
GCA_001228265.1	IU2	98.345	99.93	0	0	0	0	0	0	0	0	0	0	0	97.708	0	0	100	0	99.968	2
GCA_001228365.1	DEU16	98.345	99.872	0	0	0	0	98.73	0	0	0	0	0	0	97.708	0	0	100	0	99.961	3
GCA_001228645.1	HU13	98.345	99.93	0	0	0	0	99.048	0	0	0	0	0	0	97.708	0	0	100	0	99.968	3
GCA_001228785.1	DEU11	98.345	99.872	0	0	0	0	100	0	0	0	0	0	0	97.708	0	0	100	0	99.968	3
GCA_001228965.1	HU4	98.345	99.93	0	0	0	0	0	0	0	0	0	0	0	97.708	0	0	100	0	99.965	2
GCA_001229045.1	RA3	98.463	99.93	0	0	0	0	100	0	0	98.78	0	0	0	97.708	0	0	100	0	99.975	4
GCA_001229425.1	DEU5	98.345	99.93	0	0	0	0	0	0	0	0	0	0	0	97.708	0	0	100	0	99.968	2
GCA_001229625.1	H24	98.463	99.67	0	0	0	0	99.863	0	0	99.541	0	0	0	97.708	0	0	100	0	99.965	4
GCA_001229745.1	IU11	98.345	99.93	0	0	0	0	98.779	0	0	0	0	0	0	97.708	0	0	100	0	99.965	3
GCA_001230265.1	HU26	98.345	99.93	0	0	0	0	0	0	0	0	0	0	0	97.708	0	0	100	0	99.961	2
GCA_001230325.1	RA7	98.463	99.78	0	0	0	0	100	0	0	0	0	0	0	97.708	0	0	100	0	99.993	3
GCA_001230505.1	DEU12	98.345	99.93	0	0	0	0	0	0	0	0	0	0	0	97.708	0	0	100	0	99.965	2
GCA_001230925.1	IU15	98.345	99.93	0	0	0	0	0	0	0	0	0	0	0	97.708	0	0	100	0	99.972	2
GCA_001230965.1	IU9	98.345	99.93	0	0	0	0	98.507	0	0	0	0	0	0	97.708	0	0	100	0	99.968	3
GCA_001231325.1	M996	98.345	99.874	0	0	0	0	99.863	0	0	0	0	0	0	97.708	0	0	99.8	0	99.961	3
GCA_001231925.1	HU11	98.345	99.93	0	0	0	0	0	0	0	0	0	0	0	97.708	0	0	100	0	99.965	2
GCA_001232005.1	IU10	98.345	99.93	0	0	0	0	98.779	0	0	0	0	0	0	97.708	0	0	100	0	99.961	3
GCA_001232045.1	DEU17	98.345	99.93	0	0	0	0	0	0	0	0	0	0	0	97.708	0	0	100	0	99.968	2
GCA_001232505.1	M592	98.345	99.874	0	0	0	0	100	0	0	0	0	0	0	97.656	100	0	100	0	0	4
GCA_001232765.1	H482	98.345	99.93	0	0	0	0	0	0	0	0	0	0	0	97.708	0	0	100	0	99.972	2
GCA_001233925.1	ES26	98.463	99.78	0	0	0	0	100	0	0	0	0	0	0	97.708	0	0	100	0	99.986	3
GCA_001234245.1	DEU8	98.345	99.93	0	0	0	0	98.785	0	0	0	0	0	0	97.708	0	0	100	0	99.968	3
GCA_001234525.1	IU20	98.345	99.93	0	0	0	0	99.048	0	0	0	0	0	0	97.708	0	0	100	0	99.968	3
GCA_001234625.1	HU6	98.345	99.93	0	0	0	0	0	0	0	0	0	0	0	97.708	0	0	100	0	99.968	2
GCA_001234765.1	M116	98.463	99.874	0	0	0	0	100	0	0	0	0	0	0	97.708	100	0	100	0	99.974	4
GCA_001235205.1	Na21	98.463	99.874	0	0	0	0	100	0	0	0	0	0	0	97.708	0	0	100	0	99.982	3
GCA_001236065.1	MAL215	98.463	99.874	0	0	0	0	100	0	0	0	0	0	0	97.708	100	0	100	0	99.987	4
GCA_001236505.1	DEU10	98.345	99.93	0	0	0	0	100	0	0	0	0	0	0	97.708	0	0	100	0	99.961	3
GCA_001236885.1	HU5	98.345	99.93	0	0	0	0	98.785	0	0	0	0	0	0	97.708	0	0	100	0	99.965	3
GCA_001237305.1	MU20	98.345	99.93	0	0	0	0	0	0	0	0	0	0	0	97.708	0	0	100	0	99.961	2
GCA_001237365.1	HU14	98.345	99.93	0	0	0	0	0	0	0	0	0	0	0	97.708	0	0	100	0	99.965	2
GCA_001238925.1	HU21	98.345	99.93	0	0	0	0	0	0	0	0	0	0	0	97.708	0	0	100	0	99.965	2
GCA_001239085.1	H216	98.463	99.874	0	0	0	0	100	0	0	0	0	0	0	97.708	100	0	100	0	99.979	4
GCA_001239585.1	M705	98.463	99.874	0	0	0	0	100	0	0	98.313	0	0	0	97.656	100	0	100	0	99.972	5
GCA_001652205.1	NMR09	98.463	99.874	0	0	0	0	100	0	0	0	0	0	0	97.708	0	0	100	0	99.965	3
GCA_001652225.1	NMR07	98.463	99.874	0	0	0	0	100	0	0	0	0	0	0	97.708	0	0	100	0	99.965	3
GCA_001652285.1	NMR05	98.463	99.874	0	0	0	0	100	0	0	0	0	0	0	97.708	0	0	100	0	99.982	3
GCA_001677355.1	HC556	98.463	99.78	0	0	0	0	100	0	0	0	0	0	0	97.708	0	0	100	0	0	3
GCA_001855085.1	VB1490	98.347	99.874	0	0	0	0	100	0	0	0	0	0	0	97.708	0	0	100	0	99.975	3
GCA_002260265.1	UP1073	98.463	99.93	0	0	0	0	100	0	0	0	0	0	0	97.708	0	0	100	0	0	3
GCA_002267125.1	UP72	98.463	99.78	0	0	0	0	100	0	0	0	0	0	0	97.708	0	0	100	0	0	3
GCA_002267145.1	UP81	98.463	99.78	0	0	0	0	100	0	0	0	0	0	0	97.708	0	0	100	0	0	3
GCA_002267325.1	UCL378	98.463	99.78	0	0	0	0	100	0	0	0	0	0	0	97.708	0	0	100	0	0	3
GCA_002267625.1	UB563	98.463	99.78	0	0	0	0	100	0	0	0	0	0	0	97.656	0	0	100	0	0	3
GCA_002887495.1	UB576	99.801	99.78	0	0	0	0	100	0	0	0	0	0	0	97.708	0	0	100	0	0	3
GCA_003236195.1	SAUR1404	98.463	99.93	0	0	0	0	99.048	0	0	0	0	0	0	97.708	0	0	100	0	99.968	3
GCA_003236215.1	SAUR678	98.463	99.56	0	0	0	0	0	0	0	0	0	0	0	97.708	0	0	100	0	99.968	2
GCA_003236275.1	SAUR390	98.463	99.874	0	0	0	0	100	0	0	0	0	0	0	97.708	100	0	100	0	99.972	4
GCA_003238155.1	CM123	98.345	99.872	0	0	0	0	99.863	0	0	0	0	0	0	97.708	100	0	100	0	0	4
GCA_003238515.1	CM60	98.463	99.78	0	0	0	0	100	0	0	0	0	0	0	97.708	0	0	100	0	99.989	3
GCA_003238635.1	CM45	98.345	99.78	0	0	0	0	100	0	0	0	0	0	0	97.708	0	0	100	0	99.986	3
GCA_003239575.1	CM66	98.345	99.78	0	0	0	0	100	0	0	0	0	0	0	97.708	0	0	100	0	99.982	3
GCA_003240295.1	CM18	98.345	99.78	0	0	0	0	100	0	0	0	0	0	0	97.708	0	0	100	0	99.986	3
GCA_003240325.1	CM17	98.463	99.78	0	0	0	0	100	0	0	0	0	0	0	97.708	0	100	100	0	99.989	3
GCA_003390315.1	WCH-SK2 SCV	98.463	100	0	0	0	0	99.863	0	0	0	0	0	0	97.708	0	0	100	0	99.972	3
GCA_003693065.1	CCUG 35601	98.463	100	0	0	0	0	0	0	0	0	0	0	0	97.708	0	0	100	0	99.982	2
GCA_003725455.1	VB7185	98.463	99.874	0	0	0	0	99.863	0	0	0	0	0	0	97.708	0	0	100	0	99.972	3
GCA_003989645.1	ZS_Z30	98.463	99.874	0	0	0	0	100	0	0	0	0	0	0	97.708	100	0	100	0	99.98	4
GCA_003989655.1	ZS_Z37	98.463	99.874	0	0	0	0	100	0	0	0	0	0	0	97.708	100	0	100	0	99.974	4
GCA_003989815.1	ZS_Z46	98.463	99.874	0	0	0	0	100	0	0	0	0	0	0	97.708	100	0	100	0	99.967	4
GCA_004122795.1	SAZ_10	98.463	99.93	0	0	0	0	100	0	0	0	0	0	0	97.708	100	0	100	0	99.974	4
GCA_004122975.1	SAZ_1	98.463	99.874	0	0	0	0	99.863	0	0	100	0	0	0	97.708	100	0	100	0	99.974	5
GCA_004209875.1	SA9	98.463	99.874	0	0	0	0	100	0	0	0	0	0	0	97.708	100	0	100	0	0	4
GCA_005047435.1	42 (B)	98.463	99.56	0	0	0	0	99.048	0	0	0	0	0	0	97.708	0	0	100	0	99.979	3
GCA_005047995.1	42	98.345	99.56	0	0	0	0	99.048	0	0	0	0	0	0	97.708	0	0	100	0	0	3
GCA_005048305.1	50	98.463	99.56	0	0	0	0	99.048	0	0	98.457	0	0	0	97.708	0	0	100	0	99.968	4
GCA_005048415.1	46	98.463	99.56	0	0	0	0	0	0	0	0	0	0	0	97.708	0	0	100	0	99.979	2
GCA_005116585.1	MRSA SAZ_10	98.463	100	0	0	0	0	100	0	0	0	0	0	0	97.708	100	0	100	0	99.974	4
GCA_005861165.1	YNSA163	98.345	99.93	0	0	0	0	99.048	0	0	0	0	0	0	97.656	0	0	100	0	99.961	3
GCA_005861265.1	YNSA133	98.229	99.93	0	0	0	0	0	0	0	0	0	0	0	97.656	0	0	100	0	99.965	2
GCA_005861415.1	YNSA80	98.345	99.93	0	0	0	0	99.048	0	0	100	0	0	0	97.708	0	0	100	0	99.961	4
GCA_005861875.1	YNSA147	98.345	99.93	0	0	0	0	0	0	0	0	0	0	0	97.708	0	0	100	0	99.968	2
GCA_005861895.1	YNSA110	98.345	99.93	0	0	0	0	99.048	0	0	0	0	0	0	97.708	0	0	100	0	99.968	3
GCA_900017505.1	st697	98.463	99.874	0	0	0	0	100	0	0	0	0	0	0	97.708	100	0	100	0	0	4
GCA_900043625.1	st3021	98.463	99.874	0	0	0	0	100	0	0	0	0	0	0	97.708	100	0	100	0	99.974	4
GCA_900043945.1	st27	98.463	99.872	0	0	0	0	100	0	0	0	0	0	0	97.708	100	0	100	0	99.975	4
GCA_900058615.1	st3046	98.463	99.874	0	0	0	0	100	0	0	99.244	0	0	0	97.708	100	0	100	0	99.98	5
GCA_900126315.1	3688STDY6124938	98.463	99.874	0	0	0	0	100	0	0	98.92	0	0	0	97.708	100	0	100	0	99.967	5
GCA_900127815.1	3688STDY6124822	98.463	100	0	0	0	0	100	0	0	0	0	0	0	97.656	100	0	100	0	99.968	4
GCA_900457315.1	NCTC13134	98.463	100	0	0	0	0	100	0	0	0	0	0	0	97.708	0	0	100	0	99.986	3
GCA_900457385.1	NCTC13135	98.463	99.67	0	0	0	0	99.863	0	0	0	0	0	0	97.708	0	0	100	0	99.968	3
GCA_900457505.1	NCTC11939	98.463	99.872	0	0	0	0	99.863	0	0	0	0	0	0	97.708	0	0	100	0	99.972	3
GCA_900457755.1	NCTC13626	98.345	99.874	0	0	0	0	100	0	0	0	0	0	0	97.708	100	0	100	0	99.98	4
GCA_000978705.1	LCT-SAO	98.345	100	0	0	0	0	100	0	0	0	0	0	0	97.708	0	0	100	0	99.958	3
GCA_000978725.1	LCT-SAM	98.345	100	0	0	0	0	100	0	0	0	0	0	0	97.708	0	0	100	0	99.958	3
GCA_001045615.2	#32S	98.345	99.93	0	0	0	0	0	0	0	0	0	0	0	97.656	0	0	100	0	99.954	2
GCA_001060505.1	1193_SAUR	98.463	99.874	0	0	0	0	100	0	0	0	0	0	0	97.708	100	0	100	0	0	4
GCA_001060535.1	1194_SAUR	98.463	99.874	0	0	0	0	100	0	0	0	0	0	0	97.708	100	0	100	0	0	4
GCA_001223565.1	DEU2	98.345	99.93	0	0	0	0	100	0	0	0	0	0	0	97.708	0	0	100	0	99.968	3
GCA_001225365.1	IU19	98.345	99.872	0	0	0	0	100	0	0	100	0	0	0	97.708	0	0	100	0	99.968	4
GCA_001225725.1	IU1	98.345	99.93	0	0	0	0	99.048	0	0	0	0	0	0	97.708	0	0	100	0	99.965	3
GCA_001225825.1	DEU23	98.345	99.93	0	0	0	0	0	0	0	0	0	0	0	97.708	0	0	100	0	99.968	2
GCA_001226505.1	RA6	98.463	99.78	0	0	0	0	100	0	0	0	0	0	0	97.708	0	0	100	0	99.993	3
GCA_001226865.1	MU7	98.345	99.93	0	0	0	0	100	0	0	0	0	0	0	97.708	0	0	100	0	99.972	3
GCA_001226925.1	IU12	98.345	99.93	0	0	0	0	98.99	0	0	0	0	0	0	97.708	0	0	100	0	99.968	3
GCA_001227085.1	M1229	98.463	100	0	0	0	0	100	0	0	0	0	0	0	97.708	100	0	100	0	99.975	4
GCA_001227985.1	M278	98.463	99.78	0	0	0	0	100	0	0	0	0	0	0	97.708	0	0	100	0	99.993	3
GCA_001228725.1	DEU6	98.345	99.93	0	0	0	0	99.048	0	0	0	0	0	0	97.708	0	0	100	0	99.965	3
GCA_001229265.1	MU3	98.345	100	0	0	0	0	99.048	0	0	0	0	0	0	97.708	0	0	100	0	99.968	3
GCA_001229905.1	MAL119	98.463	99.874	0	0	0	0	100	0	0	0	0	0	0	97.656	100	0	100	0	99.98	4
GCA_001230885.1	IU4	98.345	99.93	0	0	0	0	100	0	0	0	0	0	0	97.708	0	0	100	0	99.954	3
GCA_001231365.1	IU7	98.345	99.93	0	0	0	0	99.048	0	0	0	0	0	0	97.708	0	0	100	0	99.961	3
GCA_001232225.1	LIT89	98.463	100	0	0	0	0	100	0	0	0	0	0	0	97.708	0	0	100	0	99.986	3
GCA_001232385.1	United Kingdom102	98.463	99.872	0	0	0	0	100	0	0	0	0	0	0	97.708	100	0	100	0	99.982	4
GCA_001232525.1	MU6	98.345	99.93	0	0	0	0	0	0	0	0	0	0	0	97.708	0	0	100	0	99.95	2
GCA_001234105.1	MU10	98.345	99.93	0	0	0	0	98.913	0	0	0	0	0	0	97.708	0	0	100	0	99.968	3
GCA_001234465.1	DEU19	98.345	99.93	0	0	0	0	99.863	0	0	0	0	0	0	97.708	0	0	100	0	99.961	3
GCA_001234785.1	IU6	98.345	99.93	0	0	0	0	0	0	0	0	0	0	0	97.708	0	0	100	0	99.965	2
GCA_001235385.1	H202	98.463	99.874	0	0	0	0	100	0	0	0	0	0	0	97.708	100	0	100	0	0	4
GCA_001235465.1	DEU14	98.345	99.93	0	0	0	0	98.785	0	0	0	0	0	0	97.656	0	0	100	0	99.965	3
GCA_001235485.1	MU9	95.139	99.872	0	0	0	0	0	0	0	0	0	0	0	97.708	0	0	100	0	0	2
GCA_001236045.1	HU17	98.345	99.93	0	0	0	0	98.234	0	0	0	0	0	0	97.708	0	0	100	0	99.968	3
GCA_001236265.1	HU7	98.345	99.93	0	0	0	0	0	0	0	0	0	0	0	97.708	0	0	100	0	99.968	2
GCA_001237525.1	MAL9	98.463	99.874	0	0	0	0	100	0	0	0	0	0	0	97.708	100	0	100	0	99.98	4
GCA_001237845.1	D71	98.463	100	0	0	0	0	100	0	0	0	0	0	0	97.708	0	0	100	0	99.975	3
GCA_001239185.1	LIT76	98.463	100	0	0	0	0	100	0	0	100	0	0	0	97.708	0	0	100	0	99.982	4
GCA_001239245.1	HU9	98.345	99.93	0	0	0	0	0	0	0	0	0	0	0	97.708	0	0	100	0	99.965	2
GCA_001239465.1	H211	98.463	99.874	0	0	0	0	100	0	0	0	0	0	0	97.708	100	0	100	0	0	4
GCA_001239705.1	MAL3	98.463	99.874	0	0	0	0	100	0	0	0	0	0	0	97.708	100	0	100	0	99.98	4
GCA_001652195.1	NMR02	98.463	99.874	0	0	0	0	100	0	0	0	0	0	0	97.708	0	0	100	0	99.982	3
GCA_002738565.1	smg07	98.463	99.874	0	0	0	0	100	0	0	100	0	0	0	97.656	100	0	100	0	99.972	5
GCA_003261195.1	0943-1505-2016	98.345	99.93	0	0	0	0	0	0	0	0	0	0	0	97.708	0	0	100	0	99.953	2
GCA_005861185.1	YNSA153	98.345	99.93	0	0	0	0	99.048	0	0	0	0	0	0	97.708	0	0	100	0	99.965	3
GCA_005861215.1	YNSA148	98.345	99.93	0	0	0	0	99.048	0	0	0	0	0	0	97.708	0	0	100	0	99.961	3
GCA_005861335.1	YNSA109	98.345	100	0	0	0	0	100	0	0	0	0	0	0	97.656	0	0	100	0	99.965	3
GCA_005861365.1	YNSA98	98.345	99.93	0	0	0	0	0	0	0	0	0	0	0	97.708	0	0	100	0	99.965	2
GCA_005861385.1	YNSA93	98.345	99.93	0	0	0	0	99.048	0	0	0	0	0	0	97.656	0	0	100	0	99.965	3
GCA_005861435.1	YNSA86	98.345	99.93	0	0	0	0	99.048	0	0	100	0	0	0	97.708	0	0	100	0	99.968	4
GCA_005861465.1	YNSA73	98.345	99.93	0	0	0	0	0	0	0	0	0	0	0	97.656	0	0	100	0	99.965	2
GCA_005861855.1	YNSA125	98.345	99.93	0	0	0	0	99.048	0	0	0	0	0	0	97.708	0	0	100	0	99.961	3
GCA_005861925.1	YNSA94	98.345	99.93	0	0	0	0	0	0	0	0	0	0	0	97.656	0	0	100	0	99.965	2
GCA_900067275.1	TW20	98.345	99.874	0	0	0	0	100	0	0	0	0	0	0	97.708	100	0	100	0	99.98	4
GCA_900125395.1	3688STDY6124817	98.463	99.874	0	0	0	0	100	0	0	0	0	0	0	97.656	100	0	100	0	99.968	4
GCA_900126265.1	3688STDY6124933	98.463	99.874	0	0	0	0	100	0	0	0	0	0	0	97.656	100	0	99.8	0	99.961	4
GCA_900126375.1	3688STDY6124945	98.463	99.874	0	0	0	0	100	0	0	0	0	0	0	97.708	100	0	100	0	99.982	4
GCA_900126455.1	3688STDY6124955	98.463	99.874	0	0	0	0	100	0	0	0	0	0	0	97.708	100	0	100	0	99.975	4
GCA_900250845.1	M2863	98.463	99.874	0	0	0	0	100	0	0	0	0	0	0	97.708	100	0	100	0	99.98	4
GCA_001641045.1	V605	98.463	99.874	0	0	0	0	100	0	0	0	0	0	0	97.656	100	0	100	0	99.98	4
GCA_000312965.1	PPUKM-261-2009	98.463	99.623	0	0	0	0	100	0	0	0	0	0	0	97.708	100	0	100	0	99.941	4
GCA_000312985.1	PPUKM-332-2009	98.463	99.874	0	0	0	0	100	0	0	100	0	0	0	97.708	100	0	100	0	99.961	5
GCA_000978715.1	LCT-SAG	98.345	100	0	0	0	0	100	0	0	0	0	0	0	99.732	0	0	100	0	99.959	3
GCA_000978745.1	LCT-SAS	98.307	100	0	0	0	0	100	0	0	0	0	0	0	96.961	0	0	100	0	99.966	3
GCA_000735755.1	SK1585	98.463	99.67	0	0	0	0	99.863	0	0	100	0	0	0	97.656	0	0	100	93.367	99.975	4		CC45
GCA_000009665.1	Mu50	100	100	0	0	0	0	100	0	0	0	0	0	0	97.708	0	0	100	0	99.927	3		CC5
GCA_000010445.1	Mu3	99.95	100	0	0	0	0	100	0	0	0	0	0	0	97.708	0	0	100	0	99.927	3
GCA_001019435.2	NRS1	99.95	100	0	0	0	0	100	0	0	0	0	0	0	97.708	0	0	100	0	99.927	3
GCA_001019495.2	FDAARGOS_40	99.95	100	0	0	0	0	100	0	0	0	0	0	0	97.708	0	0	100	0	99.927	3
GCA_003193705.1	AR_0219	99.95	100	0	0	0	0	100	0	0	0	0	0	0	97.708	0	0	100	0	99.927	3
GCA_004119935.1	NF25	99.851	99.93	0	0	0	0	100	0	0	0	0	0	0	97.708	0	0	100	0	99.934	3
GCA_000180095.1	Mu50-omega	99.95	100	0	0	0	0	100	0	0	0	0	0	0	97.708	0	0	100	0	99.927	3
GCA_002094075.1	3503VR10	0	100	0	0	0	0	100	0	0	0	0	0	0	97.708	0	0	100	0	99.934	3
GCA_002094085.1	3503-1	99.851	100	0	0	0	0	100	0	0	0	0	0	0	97.708	0	0	100	0	99.934	3
GCA_002094105.1	4126-1	99.701	99.93	0	0	0	0	100	0	0	0	0	0	0	97.708	0	0	100	0	99.853	3
GCA_002094135.1	4126-2	99.701	99.93	0	0	0	0	100	0	0	0	0	0	0	97.708	0	0	100	0	99.934	3
GCA_000746505.1	2395 USA500	98.463	100	0	0	0	0	0	0	0	0	0	0	0	97.656	0	0	99.8	0	99.904	2		USA500
GCA_001289605.1	2588STDY5748679	98.463	100	0	0	0	0	99.184	0	0	0	0	0	0	97.656	0	0	100	0	99.89	3
GCA_001289665.1	2588STDY5748906	99.9	100	0	0	0	0	99.184	0	0	0	0	0	0	97.656	0	0	100	0	99.89	3
GCA_001290105.1	2588STDY5627518	99.9	100	0	0	0	0	99.184	0	0	0	0	0	0	97.604	0	0	100	0	99.882	3
GCA_001290525.1	2588STDY5748881	99.9	100	0	0	0	0	99.048	0	0	0	0	0	0	97.656	0	0	99.8	0	99.904	3
GCA_900097275.1	type strain: MRSA579	99.9	99.78	0	0	0	0	99.863	0	0	0	0	0	0	97.708	0	0	100	0	99.912	3
GCA_900097395.1	MRSA 197 T(A)	99.9	99.78	0	0	0	0	99.863	0	0	100	0	0	0	97.708	0	0	100	0	99.912	4
GCA_900097415.1	MRSA40B	99.9	99.78	0	0	0	0	0	0	0	100	0	0	0	97.708	0	0	100	0	99.912	3
GCA_900097535.1	type strain: MRSA176	99.9	100	0	0	0	0	99.863	0	0	100	0	0	0	97.708	0	0	100	0	99.912	4
GCA_900097625.1	type strain: MRSA659	99.9	99.78	0	0	0	0	99.863	0	0	100	0	0	0	97.708	0	0	100	0	99.912	4
GCA_002097115.1	723	99.9	100	0	0	0	0	99.048	0	0	0	0	0	0	97.708	0	0	100	0	0	3
GCA_002097135.1	673	99.9	100	0	0	0	0	98.985	0	0	0	0	0	0	97.708	0	0	100	0	0	3
GCA_002097165.1	580	99.9	100	0	0	0	0	0	0	0	0	0	0	0	97.708	0	0	99.8	0	0	2
GCA_002097075.1	734	99.9	100	0	0	0	0	99.048	0	0	0	0	0	0	97.656	0	0	100	0	0	3
GCA_002097125.1	58	99.9	100	0	0	0	0	0	0	0	0	0	0	0	97.708	0	0	100	0	0	2
GCA_002267425.1	UV185	99.9	100	0	0	0	0	0	0	0	0	0	0	0	97.656	0	0	99.8	0	0	2
GCA_001019195.2	FDAARGOS_49	98.463	100	0	0	0	0	0	0	0	0	0	0	0	97.656	0	0	99.8	0	99.904	2
GCA_001019485.2	NRS120	98.463	99.869	0	0	0	0	0	0	0	0	0	0	0	97.656	0	0	100	0	99.904	2
GCA_003111725.1	SVH7513	98.463	0	0	0	0	0	99.048	0	0	0	0	0	0	97.708	0	0	100	0	99.912	2
GCA_003260525.1	AR_0221	98.463	100	0	0	0	0	0	0	0	0	0	0	0	97.656	0	0	100	0	99.897	2
GCA_900458125.1	NCTC10702	98.463	99.45	0	0	0	0	100	0	0	0	0	0	0	97.3	0	0	100	0	99.715	3
GCA_900458325.1	NCTC10703	98.463	99.78	0	0	0	0	100	0	0	0	0	0	0	97.708	0	0	100	0	99.907	3
GCA_000175475.1	A9765	99.9	100	0	0	0	0	99.048	0	0	0	0	0	0	97.656	0	0	99.8	0	0	3
GCA_000587755.1	F26051	98.109	99.874	0	0	0	0	99.048	0	0	0	0	0	0	97.656	0	0	99.8	0	99.897	3
GCA_000577085.1	H41336	98.109	99.874	0	0	0	0	99.048	0	0	0	0	0	0	97.656	0	0	99.8	0	99.897	3
GCA_000565095.1	H79477	99.9	100	0	0	0	0	0	0	0	0	0	0	0	97.656	0	0	99.8	0	99.897	2
GCA_000531375.1	M0002	98.463	99.869	0	0	0	0	0	0	0	0	0	0	0	97.656	0	0	100	0	99.897	2
GCA_000550885.1	M0007	98.463	0	0	0	0	0	0	0	0	0	0	0	0	97.656	0	0	100	0	99.897	1
GCA_000550905.1	M0008	98.463	0	0	0	0	0	0	0	0	0	0	0	0	97.656	0	0	100	0	99.897	1
GCA_000531615.1	M0047	98.463	99.869	0	0	0	0	0	0	0	0	0	0	0	97.656	0	0	100	0	99.897	2
GCA_000531665.1	M0059	99.95	99.869	0	0	0	0	0	0	0	0	0	0	0	97.656	0	0	100	0	99.897	2
GCA_000551805.1	M0080	99.95	99.869	0	0	0	0	99.048	0	0	0	0	0	0	97.656	0	0	100	0	99.897	3
GCA_000531775.1	M0088	98.463	99.869	0	0	0	0	0	0	0	0	0	0	0	97.656	0	0	100	0	99.897	2
GCA_000552065.1	M0097	99.95	99.869	0	0	0	0	0	0	0	0	0	0	0	97.656	0	0	100	0	99.897	2
GCA_000552125.1	M0100	99.95	99.869	0	0	0	0	99.048	0	0	0	0	0	0	97.656	0	0	100	0	99.897	3
GCA_000552145.1	M0101	99.95	99.869	0	0	0	0	0	0	0	0	0	0	0	97.656	0	0	100	0	99.897	2
GCA_000552165.1	M0107	99.95	99.869	0	0	0	0	0	0	0	0	0	0	0	97.656	0	0	100	0	99.897	2
GCA_000552185.1	M0109	99.95	99.869	0	0	0	0	99.048	0	0	0	0	0	0	97.656	0	0	100	0	99.897	3
GCA_000552225.1	M0111	99.95	99.869	0	0	0	0	99.048	0	0	0	0	0	0	97.656	0	0	100	0	99.897	3
GCA_000531855.1	M0113	99.95	99.869	0	0	0	0	0	0	0	0	0	0	0	97.656	0	0	100	0	99.897	2
GCA_000552405.1	M0123	98.463	99.869	0	0	0	0	0	0	0	0	0	0	0	97.656	0	0	100	0	99.897	2
GCA_000553325.1	M0186	98.463	99.869	0	0	0	0	0	0	0	0	0	0	0	97.656	0	0	100	0	99.897	2
GCA_000360465.1	M0221	98.463	99.869	0	0	0	0	0	0	0	0	0	0	0	97.656	0	0	100	0	99.897	2
GCA_000530635.1	M0284	98.463	0	0	0	0	0	0	0	0	0	0	0	0	97.656	0	0	100	0	99.897	1
GCA_000360725.1	M0312	98.463	99.869	0	0	0	0	99.048	0	0	0	0	0	0	97.656	0	0	100	0	99.904	3
GCA_000554865.1	M0337	99.95	99.869	0	0	0	0	99.048	0	0	0	0	0	0	97.656	0	0	100	0	99.904	3
GCA_000360845.1	M0340	98.463	0	0	0	0	0	99.044	0	0	0	0	0	0	97.656	0	0	100	0	99.897	2
GCA_000530865.1	M0352	98.463	0	0	0	0	0	0	0	0	0	0	0	0	97.656	0	0	100	0	99.897	1
GCA_000555065.1	M0353	99.95	0	0	0	0	0	0	0	0	0	0	0	0	97.656	0	0	100	0	99.897	1
GCA_000361125.1	M0424	98.463	99.869	0	0	0	0	99.048	0	0	0	0	0	0	97.656	0	0	100	0	99.897	3
GCA_000556245.1	M0453	98.463	99.869	0	0	0	0	0	0	0	0	0	0	0	97.656	0	0	100	0	99.897	2
GCA_000556265.1	M0454	99.95	99.869	0	0	0	0	0	0	0	0	0	0	0	97.656	0	0	100	0	99.897	2
GCA_000556285.1	M0457	99.95	99.869	0	0	0	0	0	0	0	0	0	0	0	97.656	0	0	100	0	99.897	2
GCA_000361265.1	M0468	98.463	99.869	0	0	0	0	0	0	0	0	0	0	0	97.656	0	0	100	0	99.831	2
GCA_000556425.1	M0469	99.95	99.869	0	0	0	0	0	0	0	0	0	0	0	97.656	0	0	100	0	99.831	2
GCA_000529515.1	M0511	98.463	99.869	0	0	0	0	0	0	0	0	0	0	0	97.656	0	0	100	0	99.897	2
GCA_000529575.1	M0524	98.463	99.869	0	0	0	0	0	0	0	0	0	0	0	97.656	0	0	100	0	99.897	2
GCA_000557045.1	M0527	98.463	0	0	0	0	0	0	0	0	0	0	0	0	97.656	0	0	100	0	99.897	1
GCA_000557205.1	M0542	99.95	99.869	0	0	0	0	0	0	0	0	0	0	0	97.656	0	0	100	0	99.897	2
GCA_000557505.1	M0563	99.95	99.869	0	0	0	0	0	0	0	0	0	0	0	97.656	0	0	100	0	99.897	2
GCA_000557525.1	M0564	99.95	99.869	0	0	0	0	0	0	0	0	0	0	0	97.656	0	0	100	0	99.897	2
GCA_000557565.1	M0567	99.95	99.869	0	0	0	0	0	0	0	0	0	0	0	97.656	0	0	100	0	99.897	2
GCA_000557665.1	M0577	99.95	99.869	0	0	0	0	0	0	0	0	0	0	0	97.656	0	0	100	0	99.897	2
GCA_000557905.1	M0593	99.95	99.869	0	0	0	0	0	0	0	0	0	0	0	97.656	0	0	100	0	99.897	2
GCA_000558185.1	M0615	99.95	99.869	0	0	0	0	99.048	0	0	0	0	0	0	97.656	0	0	100	0	99.897	3
GCA_000527735.1	M0630	99.95	99.869	0	0	0	0	0	0	0	0	0	0	0	97.656	0	0	100	0	99.897	2
GCA_000361705.1	M0633	98.463	99.869	0	0	0	0	99.048	0	0	0	0	0	0	97.656	0	0	100	0	99.897	3
GCA_000527835.1	M0636	98.463	99.869	0	0	0	0	0	0	0	0	0	0	0	97.656	0	0	100	0	99.897	2
GCA_000527935.1	M0645	99.95	99.869	0	0	0	0	0	0	0	0	0	0	0	97.656	0	0	100	0	99.897	2
GCA_000528095.1	M0658	99.95	99.869	0	0	0	0	0	0	0	0	0	0	0	97.656	0	0	100	0	99.897	2
GCA_000528175.1	M0668	99.95	99.869	0	0	0	0	0	0	0	0	0	0	0	97.656	0	0	100	0	99.897	2
GCA_000528235.1	M0671	98.463	99.869	0	0	0	0	0	0	0	0	0	0	0	97.656	0	0	100	0	99.897	2
GCA_000528735.1	M0709	98.463	99.869	0	0	0	0	0	0	0	0	0	0	0	97.656	0	0	100	0	99.897	2
GCA_000528955.1	M0729	98.463	99.869	0	0	0	0	0	0	0	0	0	0	0	97.656	0	0	100	0	99.897	2
GCA_000528975.1	M0730	98.463	99.869	0	0	0	0	0	0	0	0	0	0	0	97.656	0	0	100	0	99.897	2
GCA_000547745.1	M0760	99.95	99.869	0	0	0	0	0	0	0	0	0	0	0	97.656	0	0	100	0	99.897	2
GCA_000547845.1	M0766	98.463	99.869	0	0	0	0	0	0	0	0	0	0	0	97.656	0	0	100	0	99.897	2
GCA_000547905.1	M0771	99.95	99.869	0	0	0	0	0	0	0	0	0	0	0	97.656	0	0	100	0	99.897	2
GCA_000543845.1	M0800	99.95	99.869	0	0	0	0	0	0	0	0	0	0	0	97.656	0	0	100	0	99.897	2
GCA_000543865.1	M0801	98.463	99.869	0	0	0	0	0	0	0	0	0	0	0	97.656	0	0	100	0	99.897	2
GCA_000362065.1	M0831	98.463	99.869	0	0	0	0	0	0	0	0	0	0	0	97.656	0	0	100	0	99.897	2
GCA_000544245.1	M0833	98.463	99.869	0	0	0	0	0	0	0	0	0	0	0	97.656	0	0	100	0	99.897	2
GCA_000544525.1	M0853	98.463	99.869	0	0	0	0	0	0	0	0	0	0	0	97.656	0	0	100	0	99.897	2
GCA_000544565.1	M0858	98.463	99.869	0	0	0	0	0	0	0	0	0	0	0	97.656	0	0	100	0	99.897	2
GCA_000544965.1	M0893	99.95	99.869	0	0	0	0	0	0	0	0	0	0	0	97.656	0	0	100	0	99.904	2
GCA_000544985.1	M0894	99.95	99.869	0	0	0	0	0	0	0	0	0	0	0	97.656	0	0	100	0	99.904	2
GCA_000545205.1	M0910	98.463	99.869	0	0	0	0	0	0	0	0	0	0	0	97.656	0	0	100	0	99.897	2
GCA_000362425.1	M1007	98.463	99.869	0	0	0	0	0	0	0	0	0	0	0	97.656	0	0	100	0	99.897	2
GCA_000546425.1	M1017	98.463	99.869	0	0	0	0	0	0	0	0	0	0	0	97.656	0	0	100	0	99.897	2
GCA_000546845.1	M1056	99.95	99.869	0	0	0	0	0	0	0	0	0	0	0	97.656	0	0	100	0	99.897	2
GCA_000362645.1	M1064	98.463	99.869	0	0	0	0	99.048	0	0	0	0	0	0	97.656	0	0	100	0	99.897	3
GCA_000547245.1	M1094	98.463	99.869	0	0	0	0	0	0	0	0	0	0	0	97.656	0	0	100	0	99.831	2
GCA_000547285.1	M1101	99.95	99.869	0	0	0	0	0	0	0	0	0	0	0	97.656	0	0	100	0	99.897	2
GCA_000575825.1	M1124	99.95	99.869	0	0	0	0	0	0	0	0	0	0	0	97.656	0	0	100	0	99.897	2
GCA_000575725.1	M1132	99.95	99.869	0	0	0	0	0	0	0	0	0	0	0	97.656	0	0	100	0	99.897	2
GCA_000575445.1	M1153	99.95	99.869	0	0	0	0	0	0	0	0	0	0	0	97.656	0	0	100	0	99.897	2
GCA_000532835.1	M1183	98.463	99.869	0	0	0	0	0	0	0	0	0	0	0	97.656	0	0	100	0	99.904	2
GCA_000363025.1	M1223	98.463	99.869	0	0	0	0	0	0	0	0	0	0	0	97.656	0	0	100	0	99.897	2
GCA_000574165.1	M1262	98.463	99.869	0	0	0	0	0	0	0	0	0	0	0	97.656	0	0	100	0	99.904	2
GCA_000574145.1	M1263	98.463	99.869	0	0	0	0	0	0	0	0	0	0	0	97.656	0	0	100	0	99.897	2
GCA_000574045.1	M1270	98.463	99.869	0	0	0	0	0	0	0	0	0	0	0	97.656	0	0	100	0	99.897	2
GCA_000532955.1	M1294	98.463	99.869	0	0	0	0	0	0	0	0	0	0	0	97.656	0	0	100	0	99.904	2
GCA_000573625.1	M1297	98.463	99.869	0	0	0	0	0	0	0	0	0	0	0	97.656	0	0	100	0	99.897	2
GCA_000573525.1	M1304	99.95	99.869	0	0	0	0	99.048	0	0	0	0	0	0	97.656	0	0	100	0	99.89	3
GCA_000573325.1	M1319	98.463	99.869	0	0	0	0	0	0	0	0	0	0	0	97.656	0	0	100	0	99.897	2
GCA_000533035.1	M1346	98.463	99.869	0	0	0	0	0	0	0	0	0	0	0	97.656	0	0	100	0	99.904	2
GCA_000549545.1	M1348	99.95	99.869	0	0	0	0	0	0	0	0	0	0	0	97.656	0	0	100	0	99.897	2
GCA_000549605.1	M1351	99.95	99.869	0	0	0	0	99.048	0	0	0	0	0	0	97.656	0	0	100	0	99.89	3
GCA_000532435.1	M1375	98.463	99.869	0	0	0	0	0	0	0	0	0	0	0	97.656	0	0	100	0	99.89	2
GCA_000548305.1	M1400	99.95	100	0	0	0	0	99.048	0	0	0	0	0	0	97.656	0	0	100	0	99.89	3
GCA_000548405.1	M1408	99.95	99.869	0	0	0	0	99.048	0	0	0	0	0	0	97.656	0	0	100	0	99.89	3
GCA_000532555.1	M1427	98.463	99.869	0	0	0	0	0	0	0	0	0	0	0	97.656	0	0	100	0	99.89	2
GCA_000548885.1	M1436	99.95	99.869	0	0	0	0	0	0	0	0	0	0	0	97.656	0	0	100	0	99.89	2
GCA_000549045.1	M1447	99.95	99.869	0	0	0	0	99.048	0	0	0	0	0	0	97.656	0	0	100	0	99.89	3
GCA_000549125.1	M1453	99.95	99.869	0	0	0	0	99.048	0	0	0	0	0	0	97.656	0	0	100	0	0	3
GCA_000363545.1	M1462	98.463	99.869	0	0	0	0	99.048	0	0	0	0	0	0	97.656	0	0	100	0	99.89	3
GCA_000587335.1	M42184	98.109	99.874	0	0	0	0	98.978	0	0	0	0	0	0	97.656	0	0	99.8	0	99.897	3
GCA_000587115.1	M90388	98.109	99.874	0	0	0	0	98.978	0	0	0	0	0	0	97.656	0	0	99.8	0	99.897	3
GCA_000239675.2	21209	99.95	99.869	0	0	0	0	0	0	0	0	0	0	0	97.656	0	0	100	0	0	2
GCA_000248495.2	CIG1114	98.463	100	0	0	0	0	99.048	0	0	0	0	0	0	97.656	0	0	100	0	99.904	3
GCA_000248795.2	CIG1612	98.463	100	0	0	0	0	99.048	0	0	0	0	0	0	97.656	0	0	100	0	99.904	3
GCA_000248815.2	CIG1770	97.991	0	0	0	0	0	0	0	0	0	0	0	0	97.604	0	0	100	0	99.897	1
GCA_000248835.2	CIG2018	98.463	99.869	0	0	0	0	0	0	0	0	0	0	0	97.656	0	0	100	0	99.904	2

## Sheet: random 360 arda negatives
Supplementary File S2. Assessment of resistance-associated genes acquired by horizontal transfer in the genomes carrying ardA-H1, ardA-H2, and in those lacking these genes using ResFinder 3.0.
Assembly	Strain	beta-lactam	aminoglycoside	colistin	fosfomycin	fusidicacid	glycopeptide	macrolide	nitroimidazole	oxazolidinone	phenicol	quinolone	rifampicin	sulphonamide	tetracycline	trimethoprim	ardA-H2	ardA-H1	Tn916	Tn5801	Resistance without bl
GCA_002209325.1	FORC_045	0	100	0	0	100	0	0	0	0	0	0	0	0	0	0	0	0	0	0	2
GCA_003038455.1	SAM-16	99.9	100	0	0	100	0	0	0	0	0	0	0	0	0	0	0	0	0	0	2
GCA_003240095.1	CM49	99.409	99.78	0	0	0	0	98.912	0	0	0	0	0	0	99.855	0	0	0	0	0	3
GCA_005048375.1	19	99.409	99.874	0	0	100	0	0	0	0	0	0	0	0	100	0	0	0	0	0	3
GCA_005048455.1	43	99.409	99.874	0	0	100	0	0	0	0	0	0	0	0	100	0	0	0	0	0	3
GCA_900041235.1	st2374	99.173	100	0	0	0	0	99.863	0	0	0	0	0	0	100	0	0	0	0	0	3
GCA_001063885.1	169_SAUR	0	0	0	0	0	0	0	0	0	0	0	0	0	0	0	0	0	0	0	0
GCA_003112635.1	GUATP 6	0	0	0	0	0	0	0	0	0	0	0	0	0	0	0	0	0	0	0	0
GCA_003421225.1	M6C072	99.409	0	0	0	0	0	0	0	0	0	0	0	0	0	0	0	0	0	0	0
GCA_900097745.1	type strain: MRSA066	99.409	0	0	0	0	0	99.048	0	0	0	0	0	0	100	100	0	0	0	0	3
GCA_900250985.1	M2885	99.409	99.748	0	0	100	0	0	0	0	0	0	0	0	100	0	0	0	0	0	3
GCA_900251355.1	M3251	99.9	100	0	0	100	0	0	0	0	0	0	0	0	0	0	0	0	0	0	2
GCA_900251445.1	M3496	99.409	100	0	0	100	0	99.046	0	0	0	0	0	0	100	0	0	0	0	0	4
GCA_900251525.1	M3551	99.291	0	0	0	100	0	0	0	0	0	0	0	0	0	0	0	0	0	0	1
GCA_001019395.2	NRS484	0	0	0	0	0	0	0	0	0	0	0	0	0	0	0	0	0	0	0	0
GCA_002202075.1	Seattle 1945	0	0	0	0	0	0	0	0	0	0	0	0	0	0	0	0	0	0	0	0
GCA_000160395.1	E1410	98.463	0	0	0	0	0	0	0	0	0	0	0	0	0	0	0	0	0	0	0
GCA_000162695.1	M899	98.463	0	0	0	0	0	0	0	0	0	0	0	0	100	0	0	0	0	0	1
GCA_000362285.1	M0946	98.463	99.869	0	0	0	0	100	0	0	0	0	0	0	0	0	0	0	0	0	2
GCA_000579035.1	F82600	98.463	0	0	0	0	0	0	0	0	0	0	0	0	0	0	0	0	0	0	0
GCA_000245615.2	21345	98.463	0	0	0	0	0	0	0	0	0	0	0	0	0	0	0	0	0	0	0
GCA_000248875.2	CIG1267	98.345	100	0	0	0	0	100	0	0	0	0	0	0	0	0	0	0	0	0	2
GCA_001639185.1	SCPM-O-B-7438	98.463	0	0	0	0	0	0	0	0	0	0	0	0	0	0	0	0	0	0	0
GCA_001639205.1	SCPM-O-B-7439	98.463	0	0	0	0	0	0	0	0	0	0	0	0	0	0	0	0	0	0	0
GCA_001639225.1	SCPM-O-B-7778	98.463	0	0	0	0	0	0	0	0	0	0	0	0	0	0	0	0	0	0	0
GCA_002884555.1	UMB0910	95.626	100	0	0	0	0	100	0	0	0	0	0	0	0	0	0	0	0	0	2
GCA_003605235.1	Sau-3298Lar	98.463	100	0	0	0	0	99.863	0	0	0	0	0	0	0	0	0	0	0	0	2
GCA_003720415.1	CFBR-172	98.171	100	0	0	0	0	99.727	0	0	0	0	0	0	0	0	0	0	0	0	2
GCA_900019165.1	st711	98.463	100	0	0	0	0	100	0	0	0	0	0	0	0	0	0	0	0	0	2
GCA_900038785.1	st564	98.345	100	0	0	0	0	100	0	0	0	0	0	0	0	0	0	0	0	0	2
GCA_900038815.1	st36	98.463	100	0	0	0	0	100	0	0	0	0	0	0	0	0	0	0	0	0	2
GCA_900038845.1	st247	98.463	100	0	0	0	0	100	0	0	0	0	0	0	0	0	0	0	0	0	2
GCA_900041045.1	st1780	98.463	100	0	0	0	0	100	0	0	0	0	0	0	0	0	0	0	0	0	2
GCA_900045725.1	st305	98.463	100	0	0	100	0	100	0	0	0	0	0	0	0	0	0	0	0	0	3
GCA_900048185.1	st1632	98.463	100	0	0	0	0	100	0	0	0	0	0	0	0	0	0	0	0	0	2
GCA_900048235.1	st2398	98.463	100	0	0	0	0	100	0	0	0	0	0	0	0	0	0	0	0	0	2
GCA_900049465.1	st1011	98.463	100	0	0	0	0	100	0	0	0	0	0	0	0	0	0	0	0	0	2
GCA_900457785.1	NCTC7446	0	0	0	0	0	0	0	0	0	0	0	0	0	0	0	0	0	0	0	0
GCA_900458075.1	NCTC8766	95.745	0	0	0	0	0	0	0	0	0	0	0	0	0	0	0	0	0	0	0
GCA_900483625.1	EOE237	98.463	100	0	0	0	0	100	0	0	0	0	0	0	0	0	0	0	0	0	2
GCA_900484365.1	EOE161	98.463	100	0	0	0	0	100	0	0	0	0	0	0	0	0	0	0	0	0	2
GCA_900490425.1	EOE173	98.463	100	0	0	0	0	100	0	0	0	0	0	0	0	0	0	0	0	0	2
GCA_001067185.1	756_SAUR	98.463	0	0	0	0	0	0	0	0	0	0	0	0	0	0	0	0	0	0	0
GCA_001997145.1	ATCC 25923	0	0	0	0	0	0	0	0	0	0	0	0	0	0	0	0	0	0	0	0
GCA_002093005.2	MRSARF-10	0	0	0	0	0	0	0	0	0	0	0	0	0	0	0	0	0	0	0	0
GCA_002124595.1	CFSA198	98.463	100	0	0	0	0	100	0	0	0	0	0	0	0	0	0	0	0	0	2
GCA_002125025.1	CFSA110	98.463	100	0	0	0	0	100	0	0	0	0	0	0	0	0	0	0	0	0	2
GCA_003813445.1	G1236	98.463	0	0	0	0	0	0	0	0	0	0	0	0	0	0	0	0	0	0	0
GCA_900038415.1	st773	97.872	100	0	0	0	0	100	0	0	0	0	0	0	0	0	0	0	0	0	2
GCA_900039015.1	st1310	98.463	100	0	0	100	0	100	0	0	0	0	0	0	0	0	0	0	0	0	3
GCA_900482665.1	EOE140	98.463	100	0	0	0	0	100	0	0	0	0	0	0	0	0	0	0	0	0	2
GCA_002442975.1	HZW450	99.9	99.78	0	0	0	0	99.729	0	0	93.827	0	0	0	0	0	0	0	0	0	3
GCA_005705815.1	Lr6	98.227	99.874	0	0	0	0	98.978	0	0	0	0	0	0	0	100	0	0	0	0	3
GCA_000562835.1	H48052	99.95	0	0	0	0	0	0	0	0	0	0	0	0	0	0	0	0	0	0	0
GCA_001855145.1	VB46389	95.632	99.874	0	0	0	0	98.978	0	0	0	0	0	0	0	100	0	0	0	0	3
GCA_003237625.1	CM99	98.227	99.874	0	0	0	0	98.978	0	0	0	0	0	0	0	100	0	0	0	0	3
GCA_003240245.1	CM28	99.882	0	0	0	0	0	0	0	0	0	0	0	0	0	0	0	0	0	0	0
GCA_003710725.1	VB12492	98.227	99.874	0	0	0	0	98.909	0	0	0	0	0	0	0	100	0	0	0	0	3
GCA_003710765.1	VB103	98.227	99.874	0	0	0	0	98.978	0	0	0	0	0	0	0	100	0	0	0	0	3
GCA_004168705.1	P10	97.872	99.78	0	0	0	0	99.729	0	0	0	0	0	0	100	0	0	0	0	0	3
GCA_004168845.1	S2	97.872	99.78	0	0	0	0	99.729	0	0	93.827	0	0	0	100	0	0	0	0	0	4
GCA_005861275.1	YNSA132	99.9	99.78	0	0	0	0	99.729	0	0	93.827	0	0	0	0	0	0	0	0	0	3
GCA_900250875.1	HL456	97.872	99.757	0	0	0	0	99.729	0	0	93.827	0	0	0	100	0	0	0	0	0	4
GCA_900251195.1	M3165	95.745	0	0	0	99.844	0	0	0	0	0	0	0	0	100	0	0	0	0	0	2
GCA_001296985.1	GR2	98.227	99.78	0	0	100	0	99.048	0	0	0	0	0	0	100	0	0	0	0	0	4
GCA_001611385.1	ST20130943	98.463	0	0	0	0	0	0	0	0	0	0	0	0	0	0	0	0	0	0	0
GCA_000645415.1	VET0679S	98.463	0	0	0	0	0	0	0	0	0	0	0	0	0	0	0	0	0	0	0
GCA_000646015.1	VET1646S	98.463	0	0	0	0	0	0	0	0	0	0	0	0	0	0	0	0	0	0	0
GCA_004152675.1	SCPM-O-B-8475	97.872	0	0	0	0	0	0	0	0	0	0	0	0	0	0	0	0	0	0	0
GCA_000239595.2	21340	99.409	0	0	0	0	0	0	0	0	0	0	0	0	0	0	0	0	0	0	0
GCA_000683155.1	VET1368S	98.463	0	0	0	0	0	0	0	0	0	0	0	0	0	0	0	0	0	0	0
GCA_000708445.1	SA12-LAU	98.227	99.78	0	0	100	0	0	0	0	0	0	0	0	100	0	0	0	0	0	3
GCA_000878095.1	SA-067	0	0	0	0	0	0	0	0	0	0	0	0	0	0	0	0	0	0	0	0
GCA_003419405.1	M1K051	0	0	0	0	0	0	0	0	0	0	0	0	0	0	0	0	0	0	0	0
GCA_003420385.1	M1K221	0	0	0	0	0	0	0	0	0	0	0	0	0	0	0	0	0	0	0	0
GCA_004153585.1	SA_ME1	98.227	99.78	0	0	100	0	98.912	0	0	0	0	0	0	0	0	0	0	0	0	3
GCA_900046325.1	st2073	98.227	99.78	0	0	100	0	0	0	0	0	0	0	0	100	0	0	0	0	0	3
GCA_001066495.1	82_SAUR	99.409	100	0	0	0	0	99.864	0	0	0	0	0	0	0	0	0	0	0	0	2
GCA_002124675.1	CFSA171	98.463	0	0	0	0	0	0	0	0	0	0	0	0	0	0	0	0	0	0	0
GCA_003419925.1	M1K155	0	0	0	0	0	0	0	0	0	0	0	0	0	0	0	0	0	0	0	0
GCA_003421665.1	M6K055	0	0	0	0	0	0	0	0	0	0	0	0	0	0	0	0	0	0	0	0
GCA_003422865.1	M6K190	99.409	0	0	0	0	0	0	0	0	0	0	0	0	0	0	0	0	0	0	0
GCA_900128045.1	3688STDY6124876	99.409	0	0	0	0	0	0	0	0	0	0	0	0	0	0	0	0	0	0	0
GCA_900251005.1	M3012	98.227	0	0	0	100	0	99.048	0	0	0	0	0	0	100	0	0	0	0	0	3
GCA_000815045.1	29b_MRSA	0	0	0	0	0	0	0	0	0	0	0	0	0	0	0	0	0	0	0	0
GCA_000815085.1	31b_MRSA	0	0	0	0	0	0	0	0	0	0	0	0	0	0	0	0	0	0	0	0
GCA_001183725.2	USA300_2014.C02	99.882	0	0	0	0	0	99.591	0	0	0	0	0	0	0	0	0	0	0	0	1
GCA_000359865.1	HI049	99.882	99.874	0	0	0	0	98.978	0	0	0	0	0	0	0	0	0	0	0	0	2
GCA_000359905.1	HI168	99.882	100	0	0	0	0	98.978	0	0	0	0	0	0	0	0	0	0	0	0	2
GCA_000538735.1	SJUD6087	99.882	99.874	0	0	0	0	98.978	0	0	0	0	0	0	0	0	0	0	0	0	2
GCA_000539075.1	MISS6110	99.95	0	0	0	0	0	0	0	0	0	0	0	0	0	0	0	0	0	0	0
GCA_000539795.1	LAMC0013	99.882	100	0	0	0	0	0	0	0	0	0	0	0	0	0	0	0	0	0	1
GCA_000542985.1	HBHO6022	99.882	99.874	0	0	0	0	98.978	0	0	0	0	0	0	0	0	0	0	0	0	2
GCA_000559285.1	F41886	99.95	0	0	0	0	0	0	0	0	0	0	0	0	0	0	0	0	0	0	0
GCA_000560125.1	T66286	99.95	0	0	0	0	0	0	0	0	0	0	0	0	0	0	0	0	0	0	0
GCA_000560585.1	H84492	99.95	0	0	0	0	0	0	0	0	0	0	0	0	0	0	0	0	0	0	0
GCA_000561545.1	H33636	99.95	0	0	0	0	0	99.048	0	0	0	0	0	0	0	0	0	0	0	0	1
GCA_000564255.1	T76030	99.95	0	0	0	0	0	0	0	0	0	0	0	0	0	0	0	0	0	0	0
GCA_000569175.1	W46883	99.882	99.874	0	0	0	0	98.978	0	0	0	0	0	0	0	0	0	0	0	0	2
GCA_000569315.1	W23225	99.882	99.874	0	0	0	0	98.978	0	0	0	0	0	0	0	0	0	0	0	0	2
GCA_000569815.1	M77229	99.882	100	0	0	0	0	0	0	0	0	0	0	0	0	0	0	0	0	0	1
GCA_000570855.1	T16669	99.882	99.874	0	0	0	0	98.978	0	0	0	0	0	0	0	0	0	0	0	0	2
GCA_000570935.1	M73702	99.882	99.874	0	0	0	0	98.978	0	0	0	0	0	0	0	0	0	0	0	0	2
GCA_000572345.1	WMCA6126	99.882	99.874	0	0	0	0	98.978	0	0	0	0	0	0	0	0	0	0	0	0	2
GCA_000572465.1	WMCA6086	99.882	99.874	0	0	0	0	98.978	0	0	0	0	0	0	0	0	0	0	0	0	2
GCA_000572645.1	SJOS6145	99.882	99.874	0	0	0	0	99.048	0	0	0	0	0	0	0	0	0	0	0	0	2
GCA_000573025.1	COAS6044	99.882	0	0	0	0	0	0	0	0	0	0	0	0	0	0	0	0	0	0	0
GCA_000577435.1	H16097	99.95	99.874	0	0	0	0	0	0	0	0	0	0	0	0	0	0	0	0	0	1
GCA_000577475.1	H25869	99.882	99.874	0	0	0	0	98.978	0	0	0	0	0	0	0	0	0	0	0	0	2
GCA_000578615.1	W65904	99.882	99.874	0	0	0	0	98.978	0	0	0	0	0	0	0	0	0	0	0	0	2
GCA_000579095.1	M49474	0	0	0	0	0	0	0	0	0	0	0	0	0	0	0	0	0	0	0	0
GCA_000579315.1	F85711	99.882	0	0	0	0	0	0	0	0	0	0	0	0	0	0	0	0	0	0	0
GCA_000587015.1	T62976	99.882	0	0	0	0	0	0	0	0	0	0	0	0	0	0	0	0	0	0	0
GCA_000587535.1	H65878	99.882	99.874	0	0	0	0	98.909	0	0	0	0	0	0	0	0	0	0	0	0	2
GCA_000587575.1	H31086	99.882	0	0	0	0	0	98.978	0	0	0	0	0	0	0	0	0	0	0	0	1
GCA_000606225.1	F48420	99.882	99.874	0	0	0	0	98.978	0	0	0	0	0	0	0	0	0	0	0	0	2
GCA_000177995.1	A9754	99.882	99.874	0	0	0	0	98.978	0	0	0	0	0	0	97.604	0	0	0	0	0	3
GCA_000536635.1	FVRH6138	99.95	0	0	0	0	0	0	0	0	0	0	0	0	0	0	0	0	0	0	0
GCA_000536775.1	UCIM6134	99.882	99.874	0	0	0	0	98.978	0	0	0	0	0	0	0	0	0	0	0	0	2
GCA_000596945.1	F76239	99.882	99.874	0	0	0	0	98.978	0	0	0	0	0	0	0	0	0	0	0	0	2
GCA_000597065.1	F85184	99.882	100	0	0	0	0	98.978	0	0	0	0	0	0	0	0	0	0	0	0	2
GCA_000597125.1	F89062	99.95	0	0	0	0	0	0	0	0	0	0	0	0	0	0	0	0	0	0	0
GCA_000597425.1	T39082	99.882	99.874	0	0	0	0	98.978	0	0	0	0	0	0	0	0	0	0	0	0	2
GCA_000602405.1	H19420	99.882	99.874	0	0	0	0	98.978	0	0	0	0	0	0	0	0	0	0	0	0	2
GCA_000602445.1	H47117	99.882	99.874	0	0	0	0	98.978	0	0	0	0	0	0	0	0	0	0	0	0	2
GCA_001046135.1	C1440	99.882	99.874	0	0	0	0	98.978	0	0	0	0	0	0	0	0	0	0	0	0	2
GCA_001046575.1	C1782	97.991	0	0	0	0	0	0	0	0	0	0	0	0	0	0	0	0	0	0	0
GCA_001047835.1	USFL005	99.882	99.874	0	0	0	0	99.036	0	0	0	0	0	0	0	0	0	0	0	0	2
GCA_001192715.1	USFL315	99.882	99.874	0	0	0	0	98.978	0	0	0	0	0	0	0	0	0	0	0	0	2
GCA_001192915.1	USFL257	99.95	0	0	0	0	0	98.912	0	0	0	0	0	0	99.928	0	0	0	0	0	2
GCA_001195305.1	USFL198	99.882	99.874	0	0	0	0	98.978	0	0	0	0	0	0	0	0	0	0	0	0	2
GCA_001198695.1	USFL063	99.882	100	0	0	0	0	98.978	0	0	0	0	0	0	0	0	0	0	0	0	2
GCA_001199175.1	USFL093	99.882	99.874	0	0	0	0	98.978	0	0	0	0	0	0	0	0	0	0	0	0	2
GCA_001206875.1	USFL150	99.882	99.874	0	0	0	0	98.912	0	0	0	0	0	0	0	0	0	0	0	0	2
GCA_001207595.1	USFL141	99.882	99.874	0	0	0	0	98.978	0	0	0	0	0	0	0	0	0	0	0	0	2
GCA_001208965.1	USFL230	99.764	99.874	0	0	0	0	98.978	0	0	0	0	0	0	0	0	0	0	0	0	2
GCA_001211665.1	USFL066	99.95	0	0	0	0	0	0	0	0	0	0	0	0	0	0	0	0	0	0	0
GCA_001351855.1	USFL192	99.882	99.874	0	0	0	0	98.978	0	0	0	0	0	0	0	0	0	0	0	0	2
GCA_001351895.1	USFL219	99.882	99.874	0	0	0	0	98.978	0	0	0	0	0	0	0	0	0	0	0	0	2
GCA_001352075.1	USFL274	99.882	99.874	0	0	0	0	98.978	0	0	0	0	0	0	0	0	0	0	0	0	2
GCA_001352315.1	USFL069	99.882	99.874	0	0	0	0	98.978	0	0	0	0	0	0	0	0	0	0	0	0	2
GCA_001353135.1	USFL215	99.882	99.874	0	0	0	0	98.978	0	0	0	0	0	0	0	0	0	0	0	0	2
GCA_001353555.1	USFL095	99.882	99.874	0	0	0	0	98.978	0	0	0	0	0	0	0	0	0	0	0	0	2
GCA_001353975.1	USFL113	99.882	99.874	0	0	0	0	98.978	0	0	0	0	0	0	0	0	0	0	0	0	2
GCA_001448005.1	MRSA_S8	99.882	99.874	0	0	0	0	98.978	0	0	0	0	0	0	0	0	0	0	0	0	2
GCA_002250785.1	ABOJE	99.882	0	0	0	0	0	98.978	0	0	0	0	0	0	0	0	0	0	0	0	1
GCA_002983315.1	Case2_B0	99.882	99.874	0	0	0	0	98.978	0	0	0	0	0	0	0	0	0	0	0	0	2
GCA_003571195.1	STV232L	99.882	99.874	0	0	0	0	98.978	0	0	0	0	0	0	0	0	0	0	0	0	2
GCA_003720055.1	CFBR-316	99.882	99.748	0	0	0	0	98.978	0	0	0	0	0	0	0	0	0	0	0	0	2
GCA_001064555.1	326_SAUR	99.882	0	0	0	0	0	0	0	0	0	0	0	0	0	0	0	0	0	0	0
GCA_001065595.1	602_SAUR	99.882	99.874	0	0	0	0	98.978	0	0	0	0	0	0	0	0	0	0	0	0	2
GCA_001192675.1	USFL204	99.882	99.874	0	0	0	0	98.978	0	0	0	0	0	0	0	0	0	0	0	0	2
GCA_001287525.1	2588STDY5748538	99.882	99.874	0	0	0	0	98.978	0	0	0	0	0	0	0	0	0	0	0	0	2
GCA_001287805.1	2588STDY5748917	99.882	99.874	0	0	0	0	98.978	0	0	0	0	0	0	0	0	0	0	0	0	2
GCA_001288645.1	2588STDY5748674	99.882	99.874	0	0	0	0	98.978	0	0	0	0	0	0	0	0	0	0	0	0	2
GCA_001288745.1	2588STDY5748946	99.882	99.874	0	0	0	0	98.978	0	0	0	0	0	0	0	0	0	0	0	0	2
GCA_001288765.1	2588STDY5748344	99.882	99.874	0	0	0	0	98.978	0	0	0	0	0	0	0	0	0	0	0	0	2
GCA_001289585.1	2588STDY5748497	99.882	99.874	0	0	0	0	98.978	0	0	0	0	0	0	0	0	0	0	0	0	2
GCA_001289745.1	2588STDY5748928	99.882	99.874	0	0	0	0	98.978	0	0	0	0	0	0	0	0	0	0	0	0	2
GCA_001289885.1	2588STDY5627606	99.882	99.874	0	0	0	0	98.978	0	0	0	0	0	0	0	0	0	0	0	0	2
GCA_001290165.1	2588STDY5748496	99.882	99.874	0	0	0	0	98.978	0	0	0	0	0	0	0	0	0	0	0	0	2
GCA_001290245.1	2588STDY5748631	99.882	99.874	0	0	0	0	98.978	0	0	0	0	0	0	0	0	0	0	0	0	2
GCA_001290545.1	2588STDY5748489	99.882	99.874	0	0	0	0	98.978	0	0	0	0	0	0	0	0	0	0	0	0	2
GCA_001290625.1	2588STDY5748608	99.882	99.874	0	0	0	0	98.978	0	0	0	0	0	0	0	0	0	0	0	0	2
GCA_001354415.1	FL378	99.882	99.874	0	0	0	0	98.978	0	0	0	0	0	0	0	0	0	0	0	0	2
GCA_002120885.1	CFSA344	99.882	99.874	0	0	0	0	98.978	0	0	0	0	0	0	0	0	0	0	0	0	2
GCA_002122545.1	CFSA300	99.95	100	0	0	0	0	98.978	0	0	0	0	0	0	0	0	0	0	0	0	2
GCA_002125175.1	CFSA091	99.882	99.874	0	0	0	0	98.978	0	0	0	0	0	0	0	0	0	0	0	0	2
GCA_002126035.1	c59	99.882	99.874	0	0	0	0	98.978	0	0	0	0	0	0	0	0	0	0	0	0	2
GCA_002126105.1	c55	99.882	99.874	0	0	0	0	98.978	0	0	0	0	0	0	0	0	0	0	0	0	2
GCA_002126315.1	abscess128	99.882	99.874	0	0	0	0	98.978	0	0	0	0	0	0	0	0	0	0	0	0	2
GCA_002126335.1	abscess126	99.882	99.874	0	0	0	0	98.978	0	0	0	0	0	0	0	0	0	0	0	0	2
GCA_002126915.1	c61	99.882	99.874	0	0	0	0	98.978	0	0	0	0	0	0	0	0	0	0	0	0	2
GCA_002127455.1	CFSA116	99.882	99.874	0	0	0	0	98.978	0	0	0	0	0	0	0	0	0	0	0	0	2
GCA_900250165.1	H1303	99.882	99.874	0	0	0	0	98.978	0	0	0	0	0	0	0	0	0	0	0	0	2
GCA_000536895.1	WMCA6180	99.882	99.874	0	0	0	0	98.978	0	0	0	0	0	0	0	0	0	0	0	0	2
GCA_000537635.1	MISS6007	99.882	99.874	0	0	0	0	98.978	0	0	0	0	0	0	0	0	0	0	0	0	2
GCA_000593885.1	T60795	99.882	99.874	0	0	0	0	98.978	0	0	0	0	0	0	0	0	0	0	0	0	2
GCA_000594425.1	F26873	99.882	0	0	0	0	0	98.978	0	0	0	0	0	0	0	0	0	0	0	0	1
GCA_000594885.1	F45779	99.882	99.874	0	0	0	0	98.978	0	0	0	0	0	0	0	0	0	0	0	0	2
GCA_000594905.1	F36091	99.882	99.874	0	0	0	0	98.909	0	0	0	0	0	0	0	0	0	0	0	0	2
GCA_001045775.1	HUV03	97.991	100	0	0	0	0	0	0	0	0	0	0	0	99.928	0	0	0	0	0	2
GCA_001046015.1	CA17	97.991	0	0	0	0	0	0	0	0	0	0	0	0	0	0	0	0	0	0	0
GCA_001203915.1	USFL143	99.764	0	0	0	0	0	0	0	0	0	0	0	0	0	0	0	0	0	0	0
GCA_001290565.1	2588STDY5747520	0	0	0	0	0	0	0	0	0	0	0	0	0	0	0	0	0	0	0	0
GCA_001352975.1	USFL236	99.882	100	0	0	0	0	98.978	0	0	0	0	0	0	0	0	0	0	0	0	2
GCA_900047165.1	st297	98.463	99.78	0	0	0	0	100	0	0	0	0	0	0	0	0	0	0	0	0	2
GCA_002267205.1	UE181	97.991	0	0	0	0	0	0	0	0	0	0	0	0	0	0	0	0	0	0	0
GCA_001018685.2	TCH 959	0	0	0	0	0	0	0	0	0	0	0	0	0	0	0	0	0	0	0	0
GCA_003354885.1	164	0	0	0	0	0	0	0	0	0	0	0	0	0	0	0	0	0	0	0	0
GCA_003571225.1	STV658L	97.991	0	0	0	0	0	0	0	0	0	0	0	0	0	0	0	0	0	0	0
GCA_000171435.1	930918-3	98.463	99.78	0	0	0	0	99.863	0	0	0	0	0	0	0	100	0	0	0	0	3
GCA_000547705.1	M0758	97.872	100	0	0	0	0	100	0	0	0	0	0	0	0	0	0	0	0	0	2
GCA_000579635.1	M49501	99.882	99.874	0	0	0	0	98.978	0	0	0	0	0	0	0	0	0	0	0	0	2
GCA_000538935.1	OCMM6048	98.463	0	0	0	0	0	0	0	0	0	0	0	0	0	100	0	0	0	0	1
GCA_000537135.1	SMMC6087	99.764	99.874	0	0	0	0	98.978	0	0	0	0	0	0	0	0	0	0	0	0	2
GCA_000538495.1	WAMC6013	99.882	0	0	0	0	0	0	0	0	0	0	0	0	0	0	0	0	0	0	0
GCA_001448105.1	MRSA_S11	97.991	0	0	0	0	0	0	0	0	0	0	0	0	0	0	0	0	0	0	0
GCA_001448235.1	MRSA_S9	97.991	0	0	0	0	0	0	0	0	0	0	0	0	0	0	0	0	0	0	0
GCA_900323965.1	1549-SCV	0	0	0	0	0	0	0	0	0	0	0	0	0	0	0	0	0	0	0	0
GCA_000362125.1	M0877	99.882	0	0	0	0	0	99.048	0	0	0	0	0	0	0	0	0	0	0	0	1
GCA_000573705.1	M1292	99.95	100	0	0	0	0	100	0	0	0	0	0	0	0	0	0	0	0	0	2
GCA_003422325.1	M6K127	98.227	0	0	0	0	0	0	0	0	0	0	0	0	0	0	0	0	0	0	0
GCA_002905495.1	B26A_160215	99.409	0	0	0	0	0	0	0	0	0	0	0	0	0	0	0	0	0	0	0
GCA_003418135.1	M1C063	0	0	0	0	0	0	0	0	0	0	0	0	0	0	0	0	0	0	0	0
GCA_003421825.1	M6K073	99.882	0	0	0	0	0	0	0	0	0	0	0	0	0	0	0	0	0	0	0
GCA_000831765.1	PB1-15-1	95.745	0	0	0	0	0	0	0	0	0	0	0	0	0	0	0	0	0	0	0
GCA_000831775.1	PB1-15-2	95.745	0	0	0	0	0	0	0	0	0	0	0	0	0	0	0	0	0	0	0
GCA_001207435.1	BSAR169_2	95.745	0	0	0	0	0	99.048	0	0	0	0	0	0	0	0	0	0	0	0	1
GCA_001210925.1	BSAR870	95.745	0	0	0	0	0	99.048	0	0	0	0	0	0	0	0	0	0	0	0	1
GCA_001227945.1	ARI7	95.745	0	0	0	0	0	99.048	0	0	0	0	0	0	0	0	0	0	0	0	1
GCA_001230185.1	T277 06	95.745	0	0	0	0	0	0	0	0	0	0	0	0	0	0	0	0	0	0	0
GCA_001230765.1	M810 08	95.745	0	0	0	0	0	99.048	0	0	0	0	0	0	0	0	0	0	0	0	1
GCA_001349535.1	BSAR173_2	95.745	0	0	0	0	0	0	0	0	0	0	0	0	0	0	0	0	0	0	0
GCA_001349555.1	BSAR186_2	95.745	0	0	0	0	0	0	0	0	0	0	0	0	0	0	0	0	0	0	0
GCA_001349735.1	BSAR195_2	95.745	0	0	0	0	0	99.048	0	0	0	0	0	0	0	0	0	0	0	0	1
GCA_002097205.1	622	95.745	0	0	0	0	0	0	0	0	0	0	0	0	0	0	0	0	0	0	0
GCA_003237415.1	CM121	99.851	0	0	0	0	0	0	0	0	0	0	0	0	0	0	0	0	0	0	0
GCA_003239945.1	CM71	95.745	0	0	0	0	0	99.048	0	0	0	0	0	0	0	0	0	0	0	0	1
GCA_900017525.1	st694	95.745	0	0	0	0	0	99.048	0	0	0	0	0	0	0	0	0	0	0	0	1
GCA_900017645.1	st2530	95.745	0	0	0	0	0	99.048	0	0	0	0	0	0	0	0	0	0	0	0	1
GCA_900017685.1	st2578	95.745	0	0	0	0	0	99.048	0	0	0	0	0	0	0	0	0	0	0	0	1
GCA_900017705.1	st2584	95.745	0	0	0	0	0	0	0	0	0	0	0	0	0	0	0	0	0	0	0
GCA_900018025.1	st1024	95.745	0	0	0	0	0	0	0	0	0	0	0	0	0	0	0	0	0	0	0
GCA_900018055.1	st1061	95.745	0	0	0	0	0	99.048	0	0	0	0	0	0	0	0	0	0	0	0	1
GCA_900018095.1	st1114	95.745	0	0	0	0	0	99.048	0	0	0	0	0	0	0	0	0	0	0	0	1
GCA_900018205.1	st1285	95.745	0	0	0	0	0	99.048	0	0	0	0	0	0	0	0	0	0	0	0	1
GCA_900019035.1	st105	95.745	0	0	0	0	0	99.048	0	0	0	0	0	0	0	0	0	0	0	0	1
GCA_900019195.1	st987	95.745	0	0	0	0	0	99.048	0	0	0	0	0	0	0	0	0	0	0	0	1
GCA_900020275.1	st825	95.745	0	0	0	0	0	0	0	0	0	0	0	0	0	0	0	0	0	0	0
GCA_900022605.1	st121	95.745	0	0	0	0	0	99.048	0	0	0	0	0	0	0	0	0	0	0	0	1
GCA_900031675.1	st2201	95.745	100	0	0	0	0	0	0	0	0	0	0	0	0	0	0	0	0	0	1
GCA_900037855.1	st1110	95.745	0	0	0	0	0	0	0	0	0	0	0	0	0	0	0	0	0	0	0
GCA_900037885.1	st1141	95.745	0	0	0	0	0	0	0	0	0	0	0	0	0	0	0	0	0	0	0
GCA_900037945.1	st1194	95.745	0	0	0	0	0	99.048	0	0	0	0	0	0	0	0	0	0	0	0	1
GCA_900037975.1	st1216	95.745	0	0	0	0	0	99.048	0	0	0	0	0	0	0	0	0	0	0	0	1
GCA_900038225.1	st187	95.745	0	0	0	0	0	0	0	0	0	0	0	0	0	0	0	0	0	0	0
GCA_900038275.1	st235	95.745	0	0	0	0	0	0	0	0	0	0	0	0	0	0	0	0	0	0	0
GCA_900038445.1	st77	95.745	0	0	0	0	0	0	0	0	0	0	0	0	0	0	0	0	0	0	0
GCA_900038525.1	st977	95.745	0	0	0	0	0	99.048	0	0	0	0	0	0	0	0	0	0	0	0	1
GCA_900038535.1	st1004	95.745	0	0	0	0	0	99.048	0	0	0	0	0	0	0	0	0	0	0	0	1
GCA_900038715.1	st170	95.745	0	0	0	0	0	99.048	0	0	0	0	0	0	0	0	0	0	0	0	1
GCA_900039175.1	st1536	95.745	0	0	0	0	0	0	0	0	0	0	0	0	0	0	0	0	0	0	0
GCA_900039715.1	st978	95.745	0	0	0	0	0	99.048	0	0	0	0	0	0	0	0	0	0	0	0	1
GCA_900039755.1	st1321	99.9	0	0	0	0	0	99.048	0	0	0	0	0	0	0	0	0	0	0	0	1
GCA_900039815.1	st1433	95.745	0	0	0	0	0	0	0	0	0	0	0	0	0	0	0	0	0	0	0
GCA_900040865.1	st577	95.745	0	0	0	0	0	99.048	0	0	0	0	0	0	0	0	0	0	0	0	1
GCA_900040925.1	st983	95.745	100	0	0	0	0	99.048	0	0	0	0	0	0	100	0	0	0	0	0	3
GCA_900041115.1	st1928	95.745	0	0	0	0	0	95.238	0	0	0	0	0	0	0	0	0	0	0	0	1
GCA_900041935.1	st664	95.745	0	0	0	0	0	99.048	0	0	0	0	0	0	100	0	0	0	0	0	2
GCA_900042015.1	st1014	95.745	0	0	0	0	0	99.048	0	0	0	0	0	0	0	0	0	0	0	0	1
GCA_900042075.1	st1153	95.745	0	0	0	0	0	99.048	0	0	0	0	0	0	0	0	0	0	0	0	1
GCA_900042295.1	st1707	95.745	0	0	0	0	0	99.048	0	0	0	0	0	0	0	0	0	0	0	0	1
GCA_900042535.1	st2154	95.745	0	0	0	0	0	99.048	0	0	0	0	0	0	0	0	0	0	0	0	1
GCA_900043645.1	st856	95.745	0	0	0	0	0	99.048	0	0	0	0	0	0	0	0	0	0	0	0	1
GCA_900044605.1	st2230	95.745	0	0	0	0	0	99.048	0	0	0	0	0	0	0	0	0	0	0	0	1
GCA_900044635.1	st2251	95.745	0	0	0	0	0	99.048	0	0	0	0	0	0	0	0	0	0	0	0	1
GCA_900045475.1	st2954	95.745	0	0	0	0	0	0	0	0	0	0	0	0	0	0	0	0	0	0	0
GCA_900047135.1	st955	95.745	0	0	0	0	0	0	0	0	0	0	0	0	0	0	0	0	0	0	0
GCA_900047465.1	st72	95.745	0	0	0	0	0	99.048	0	0	0	0	0	0	0	0	0	0	0	0	1
GCA_900048375.1	st2476	95.745	0	0	0	0	0	99.048	0	0	0	0	0	0	0	0	0	0	0	0	1
GCA_900048445.1	st403	95.745	0	0	0	0	0	99.048	0	0	0	0	0	0	0	0	0	0	0	0	1
GCA_900048605.1	st832	95.745	0	0	0	0	0	0	0	0	0	0	0	0	0	0	0	0	0	0	0
GCA_900048635.1	st894	95.745	0	0	0	0	0	99.048	0	0	0	0	0	0	0	0	0	0	0	0	1
GCA_900049425.1	st2527	95.745	0	0	0	0	0	99.048	0	0	100	0	0	0	0	0	0	0	0	0	2
GCA_900050285.1	st1898	95.745	0	0	0	0	0	0	0	0	0	0	0	0	0	0	0	0	0	0	0
GCA_900050605.1	st3142	95.745	0	0	0	0	0	99.048	0	0	0	0	0	0	0	0	0	0	0	0	1
GCA_900051775.1	st2808	95.863	0	0	0	0	0	0	0	0	0	0	0	0	0	0	0	0	0	0	0
GCA_900052365.1	st1692	95.745	0	0	0	0	0	99.048	0	0	0	0	0	0	0	0	0	0	0	0	1
GCA_900053465.1	st1118	95.745	0	0	0	0	0	0	0	0	0	0	0	0	0	0	0	0	0	0	0
GCA_900058115.1	st2586	95.745	0	0	0	0	0	0	0	0	0	0	0	0	0	0	0	0	0	0	0
GCA_900061985.1	st684	95.745	0	0	0	0	0	0	0	0	0	0	0	0	0	0	0	0	0	0	0
GCA_900063305.1	st2908	95.745	0	0	0	0	0	99.048	0	0	0	0	0	0	0	0	0	0	0	0	1
GCA_900482735.1	EOE113	95.745	0	0	0	0	0	99.048	0	0	0	0	0	0	0	0	0	0	0	0	1
GCA_900483585.1	EOE241	95.745	0	0	0	0	0	99.048	0	0	0	0	0	0	0	0	0	0	0	0	1
GCA_900483705.1	EOE262	95.745	0	0	0	0	0	99.048	0	0	0	0	0	0	0	0	0	0	0	0	1
GCA_900483785.1	EOE230	95.745	0	0	0	0	0	0	0	0	0	0	0	0	0	0	0	0	0	0	0
GCA_900484425.1	EOE204	95.745	0	0	0	0	0	99.048	0	0	0	0	0	0	0	0	0	0	0	0	1
GCA_001192895.1	BSAR747	95.745	0	0	0	0	0	98.963	0	0	0	0	0	0	0	0	0	0	0	0	1
GCA_001201035.1	BSAR724	95.745	0	0	0	0	0	99.048	0	0	0	0	0	0	0	0	0	0	0	0	1
GCA_001227645.1	04-02315-1	95.863	0	0	0	0	0	0	0	0	0	0	0	0	0	0	0	0	0	0	0
GCA_001229925.1	09-00980	95.745	0	0	0	0	0	99.048	0	0	0	0	0	0	0	0	0	0	0	0	1
GCA_001231445.1	06-02400	95.745	0	0	0	0	0	99.048	0	0	0	0	0	0	0	0	0	0	0	0	1
GCA_001234705.1	07-02990	95.745	0	0	0	0	0	0	0	0	0	0	0	0	0	0	0	0	0	0	0
GCA_001234845.1	09-01249	95.745	0	0	0	0	0	0	0	0	0	0	0	0	0	0	0	0	0	0	0
GCA_001235185.1	08-01667	95.745	0	0	0	0	0	99.048	0	0	0	0	0	0	0	0	0	0	0	0	1
GCA_001237625.1	07-03356	95.745	0	0	0	0	0	0	0	0	0	0	0	0	0	0	0	0	0	0	0
GCA_001239165.1	07-00309	95.745	0	0	0	0	0	99.048	0	0	0	0	0	0	0	0	0	0	0	0	1
GCA_002843855.1	MR6	99.95	0	0	0	0	0	99.048	0	0	0	0	0	0	0	0	0	0	0	0	1
GCA_900017555.1	st995	95.745	0	0	0	0	0	99.048	0	0	0	0	0	0	0	0	0	0	0	0	1
GCA_900037805.1	st966	95.745	0	0	0	0	0	99.048	0	0	0	0	0	0	0	0	0	0	0	0	1
GCA_900043565.1	st2827	95.745	0	0	0	0	0	0	0	0	0	0	0	0	0	0	0	0	0	0	0
GCA_900052955.1	st2823	95.745	0	0	0	0	0	99.048	0	0	0	0	0	0	0	0	0	0	0	0	1
GCA_900250995.1	M2906	95.863	99.869	0	0	0	0	0	0	0	0	0	0	0	0	0	0	0	0	0	1
GCA_900251565.1	M3684	95.745	0	0	0	0	0	0	0	0	0	0	0	0	0	0	0	0	0	0	0
GCA_000831795.1	PB3-29	95.745	0	0	0	0	0	0	0	0	0	0	0	0	0	0	0	0	0	0	0
GCA_001208785.1	BSAR863	95.745	0	0	0	0	0	0	0	0	0	0	0	0	0	0	0	0	0	0	0
GCA_000360185.1	M0108	99.95	99.869	0	0	0	0	100	0	0	0	0	0	0	0	0	0	0	0	0	2
GCA_000360305.1	M0177	97.991	100	0	0	0	0	100	0	0	0	0	0	0	0	0	0	0	0	0	2
GCA_000360945.1	M0364	97.872	99.869	0	0	0	0	100	0	0	0	0	0	0	0	0	0	0	0	0	2
GCA_000360985.1	M0374	97.991	99.869	0	0	0	0	100	0	0	0	0	0	0	0	0	0	0	0	0	2
GCA_000362845.1	M1126	97.754	99.869	0	0	0	0	100	0	0	0	0	0	0	0	0	0	0	0	0	2
GCA_000528215.1	M0670	99.95	100	0	0	0	0	100	0	0	0	0	0	0	0	0	0	0	0	0	2
GCA_000529475.1	M0498	97.991	99.869	0	0	0	0	100	0	0	0	0	0	0	99.635	0	0	0	0	0	3
GCA_000531995.1	M0849	97.991	99.869	0	0	0	0	100	0	0	0	0	0	0	0	0	0	0	0	0	2
GCA_000532035.1	M0864	99.95	99.869	0	0	0	0	100	0	0	0	0	0	0	0	0	0	0	0	0	2
GCA_000532215.1	M0973	99.95	99.869	0	0	0	0	100	0	0	0	0	0	0	0	0	0	0	0	0	2
GCA_000538515.1	WMCA6040	97.991	99.869	0	0	0	0	100	0	0	0	0	0	0	0	0	0	0	0	0	2
GCA_000541395.1	SJUD6124	99.95	99.869	0	0	0	0	100	0	0	0	0	0	0	0	0	0	0	0	0	2
GCA_000543225.1	WAMC6086	99.95	99.869	0	0	0	0	100	0	0	0	0	0	0	0	0	0	0	0	0	2
GCA_000543665.1	M0786	97.991	99.869	0	0	0	0	100	0	0	0	0	0	0	0	0	0	0	0	0	2
GCA_000544185.1	M0824	97.754	99.869	0	0	0	0	100	0	0	0	0	0	0	0	0	0	0	0	0	2
GCA_000544365.1	M0840	97.872	99.869	0	0	0	0	100	0	0	0	0	0	0	0	0	0	0	0	0	2
GCA_000545085.1	M0901	97.927	99.869	0	0	0	0	100	0	0	0	0	0	0	0	0	0	0	0	0	2
GCA_000545365.1	M0920	99.95	99.869	0	0	0	0	100	0	0	0	0	0	0	0	0	0	0	0	0	2
GCA_000545925.1	M0969	97.991	99.869	0	0	0	0	0	0	0	0	0	0	0	0	0	0	0	0	0	1
GCA_000549785.1	M1365	99.95	99.869	0	0	0	0	100	0	0	0	0	0	0	0	0	0	0	0	0	2
GCA_000550345.1	M1519	97.991	99.869	0	0	0	0	100	0	0	0	0	0	0	0	0	0	0	0	0	2
GCA_000550385.1	M1524	99.95	99.869	0	0	0	0	100	0	0	0	0	0	0	0	0	0	0	0	0	2
GCA_000552805.1	M0149	99.95	99.869	0	0	0	0	100	0	0	0	0	0	0	0	0	0	0	0	0	2
GCA_000553385.1	M0191	97.754	99.869	0	0	0	0	100	0	0	0	0	0	0	0	0	0	0	0	0	2
GCA_000554045.1	M0265	99.95	99.869	0	0	0	0	100	0	0	0	0	0	0	0	0	0	0	0	0	2
GCA_000555245.1	M0369	99.95	99.869	0	0	0	0	100	0	0	0	0	0	0	0	0	0	0	0	0	2
GCA_000575405.1	M1158	99.95	99.869	0	0	0	0	100	0	0	0	0	0	0	0	0	0	0	0	0	2
GCA_000575625.1	M1140	99.95	99.869	0	0	0	0	100	0	0	0	0	0	0	0	0	0	0	0	0	2
GCA_000579475.1	H49864	99.882	99.869	0	0	0	0	100	0	0	0	0	0	0	0	0	0	0	0	0	2
GCA_000579675.1	M55890	97.991	99.869	0	0	0	0	100	0	0	0	0	0	0	0	0	0	0	0	0	2
GCA_000604785.1	F42568	97.991	100	0	0	0	0	100	0	0	0	0	0	0	0	0	0	0	0	0	2
GCA_000607465.1	DAR3562	97.991	99.869	0	0	0	0	100	0	0	0	0	0	0	0	0	0	0	0	0	2
GCA_000607485.1	DAR3565	97.991	0	0	0	0	0	0	0	0	0	0	0	0	0	0	0	0	0	0	0
GCA_000608325.1	DAR3796	97.991	100	0	0	0	0	100	0	0	0	0	0	0	0	0	0	0	0	0	2
GCA_000608405.1	DAR3844	97.991	99.869	0	0	0	0	100	0	0	0	0	0	0	0	0	0	0	0	0	2
GCA_000609945.1	DAR1890	0	0	0	0	0	0	0	0	0	0	0	0	0	0	0	0	0	0	0	0
GCA_000533535.1	M0269	97.991	0	0	0	0	0	99.048	0	0	0	0	0	0	0	0	0	0	0	0	1
GCA_000533695.1	M0358	99.95	99.869	0	0	0	0	100	0	0	0	0	0	0	0	0	0	0	0	0	2
GCA_000535255.1	M0923	99.95	99.869	0	0	0	0	100	0	0	0	0	0	0	0	0	0	0	0	0	2
GCA_000535435.1	M1008	99.95	99.869	0	0	0	0	100	0	0	0	0	0	0	0	0	0	0	0	0	2
GCA_000535835.1	M0765	99.95	99.869	0	0	0	0	100	0	0	0	0	0	0	0	0	0	0	0	0	2
GCA_000535935.1	M1388	97.991	99.869	0	0	0	0	100	0	0	0	0	0	0	0	0	0	0	0	0	2
GCA_000536295.1	M1543	97.754	99.869	0	0	0	0	99.048	0	0	0	0	0	0	0	0	0	0	0	0	2
GCA_000536375.1	M1554	97.872	99.869	0	0	0	0	100	0	0	0	0	0	0	0	0	0	0	0	0	2
GCA_000601845.1	W31983	99.95	99.869	0	0	0	0	0	0	0	0	0	0	0	0	0	0	0	0	0	1
GCA_000602465.1	H81898	97.766	99.869	0	0	0	0	100	0	0	0	0	0	0	0	0	0	0	0	0	2
GCA_000602965.1	T22073	97.991	100	0	0	0	0	100	0	0	0	0	0	0	0	0	0	0	0	0	2
GCA_000626835.1	CO-30	97.991	100	0	0	0	0	99.184	0	0	0	0	0	0	0	0	0	0	0	0	2
GCA_001453975.1	MRSA_CVMN25720PS	99.409	0	0	0	0	0	0	0	0	0	0	0	0	0	0	0	0	0	0	0
GCA_001900115.1	SA_180009	99.882	99.869	0	0	0	0	98.978	0	0	0	0	0	0	0	0	0	0	0	0	2
GCA_003038745.1	SAM-7	0	0	0	0	0	0	0	0	0	0	0	0	0	0	0	0	0	0	0	0
GCA_003095135.1	UG286	97.754	99.869	0	0	0	0	100	0	0	0	0	0	0	0	0	0	0	0	0	2
GCA_003720025.1	CFBR-146	99.95	99.869	0	0	0	0	100	0	0	0	0	0	0	0	0	0	0	0	0	2
GCA_003721035.1	BCH-SA-05	99.95	99.869	0	0	0	0	100	0	0	0	0	0	0	0	0	0	0	0	0	2
GCA_900124755.1	3688STDY6124981	99.409	0	0	0	0	0	0	0	0	0	0	0	0	100	0	0	0	0	0	1
GCA_003422465.1	M6K146	97.991	0	0	0	0	0	99.729	0	0	0	0	0	0	0	0	0	0	0	0	1
GCA_005860965.1	YNSA394	97.872	0	0	0	0	0	0	0	0	0	0	0	0	0	0	0	0	0	0	0
GCA_900124835.1	3688STDY6124990	95.508	0	0	0	0	0	0	0	0	0	0	0	0	0	0	0	0	0	0	0
GCA_000639455.1	MRSA-118	98.463	100	0	0	0	0	100	0	0	0	0	0	0	0	0	0	0	0	0	2
GCA_000639495.1	MSSA-93	0	0	0	0	0	0	0	0	0	0	0	0	0	0	0	0	0	0	0	0
GCA_000647315.1	ZTA09/03734-9HSA	0	99.647	0	0	0	0	0	0	0	0	0	0	0	0	0	0	0	0	0	1
GCA_000647335.1	ZTA09/03745-9HSA	0	0	0	0	0	0	0	0	0	0	0	0	0	0	0	0	0	0	0	0
GCA_003309905.1	SAY42	95.981	99.78	0	0	0	0	99.864	0	0	99.79	0	0	0	100	0	0	0	0	0	4
