# Supplementary material for: Anti-Restriction Gene Homologs Are Highly Represented in Methicillin-Resistant and Multidrug-Resistant Staphylococcus aureus ST239 and ST398: Implications for Resistance Gene Acquisitions
Source: Antibiotics (Basel). 2022 Sep 8;11(9):1217. doi: 10.3390/antibiotics11091217 (PMC9495042; doi:10.3390/antibiotics11091217)
Supplement: Supplementary file 1 [file antibiotics-11-01217-s001.zip › Supplementary file S3.xlsx]

## Sheet: ardA presence
		Supplementary File S3: Local database: genomes belonging to clonal complexes (CCs) commonly found among CA-MRSA, HA-MRSA and LA-MRSA; and assessment of resistance-associated genes acquired by horizontal transfer using ResFinder 3.0.
		HA-MRSA
			Total(genomes)	ardA positives	ardA negatives	ardA-H1	ardA-H2		ardA positives (%)
		STs related to USA500	339	132	207	123	9		0.3894
		STs related to CC5	1036	19	1017	11	8		0.0183
		STs related to ST239	224	224	0	224	1*		1
		STs related to CC22	1281	2	1279	0	2		0.0016
		STs related to CC45	172	2	170	1	1		0.0116
			3052	379	2673	359	21
		CA-MRSA
			Total(genomes)	ardA positives	ardA negatives	ardA-H1	ardA-H2
		STs related to USA300	1447	2	1445	0	2		0.0014
		STs related to CC59	178	0	178	0	0		0
		STs related to CC80	164	0	164	0	0		0
		STs related to CC1	157	2	155	0	2		0.0127
		STs related to CC30	438	12	426	1	11		0.0274
			2384	16	2368	1	15
		LA-MRSA
			Total(genomes)	ardA positives	ardA negatives	ardA-H1	ardA-H2
		STs related to CC398	780	746	34	0	746		0.9564
		*There is one ST239 genome (CM17) that contains both ardA-H1 and ardA-H2

## Sheet: CC1
Assembly	Strain	beta-lactam	aminoglycoside	colistin	fosfomycin	fusidicacid	glycopeptide	macrolide	nitroimidazole	oxazolidinone	phenicol	quinolone	rifampicin	sulphonamide	tetracycline	trimethoprim	ardA-H2	ardA-H1	Tn916	Tn5801	Resistance without bl
GCA_000011265.1	MW2	99.95	0	0	0	0	0	0	0	0	0	0	0	0	0	0	0	0	0	0	0
GCA_000011525.1	MSSA476	99.409	0	0	0	100	0	0	0	0	0	0	0	0	0	0	0	0	0	0	1
GCA_001018645.2	FDAARGOS_2	0	0	0	0	100	0	0	0	0	0	0	0	0	0	0	0	0	0	0	1
GCA_001019125.2	FDAARGOS_43	99.95	0	0	0	0	0	0	0	0	0	0	0	0	0	0	0	0	0	0	0
GCA_001019535.2	Mw2	99.95	0	0	0	0	0	0	0	0	0	0	0	0	0	0	0	0	0	0	0
GCA_001879545.1	FORC_026	0	100	0	0	100	0	99.863	0	0	0	0	0	0	0	0	0	0	0	0	3
GCA_002209325.1	FORC_045	0	100	0	0	100	0	0	0	0	0	0	0	0	0	0	0	0	0	0	2
GCA_002633825.1	CFSAN007851	99.409	0	0	0	0	0	0	0	0	0	0	0	0	0	0	0	0	0	0	0
GCA_002795285.1	USA400-0051	99.409	0	0	0	0	0	0	0	0	0	0	0	0	0	0	0	0	0	0	0
GCA_003573835.1	JMUB3031	99.409	100	0	0	0	0	99.863	0	0	0	0	0	0	0	0	0	0	0	0	2
GCA_003952625.1	PMB 81-4	0	100	0	0	100	0	99.863	0	0	0	0	0	0	0	0	0	0	0	0	3
GCA_003957315.1	PMB 64-1	0	0	0	0	0	0	0	0	0	0	0	0	0	0	0	0	0	0	0	0
GCA_900620215.1	BPH2760	99.409	0	0	0	0	0	0	0	0	0	0	0	0	0	0	0	0	0	0	0
GCA_002356655.1	No.10	99.409	0	0	0	0	0	0	0	0	0	0	0	0	0	0	0	0	0	0	0
GCA_000149015.1	TCH70	99.409	0	0	0	0	0	0	0	0	0	0	0	0	97.968	0	0	0	0	0	1
GCA_000164715.1	ATCC 51811	99.409	0	0	0	0	0	0	0	0	0	0	0	0	0	0	0	0	0	0	0
GCA_000538415.1	OCMM6035	99.409	99.872	0	0	0	0	100	0	0	0	0	0	0	0	0	0	0	0	0	2
GCA_000539235.1	LAMC6065	97.991	99.872	0	0	0	0	100	0	0	0	0	0	0	0	0	0	0	0	0	2
GCA_000540615.1	MISS6027	99.95	100	0	0	0	0	100	0	0	0	0	0	0	0	0	0	0	0	0	2
GCA_000573045.1	MISS6103	99.95	100	0	0	0	0	100	0	0	0	0	0	0	0	0	0	0	0	0	2
GCA_001275825.1	A1	0	0	0	0	100	0	0	0	0	0	0	0	0	0	0	0	0	0	0	1
GCA_002188415.1	SCPM-O-B-7907	99.409	0	0	0	0	0	0	0	0	0	0	0	0	0	0	0	0	0	0	0
GCA_002188495.1	SCPM-O-B-7904	99.409	0	0	0	0	0	0	0	0	0	0	0	0	0	0	0	0	0	0	0
GCA_000248655.2	CIG1835	99.409	0	0	0	0	0	0	0	0	0	0	0	0	0	0	0	0	0	0	0
GCA_000249015.2	CIGC128	99.409	0	0	0	0	0	0	0	0	0	0	0	0	0	0	0	0	0	0	0
GCA_000336515.1	KT/314250	99.409	99.874	0	0	100	0	0	0	0	0	0	0	0	0	0	0	0	0	0	2
GCA_000577355.1	S2396	99.291	0	0	0	0	0	0	0	0	0	0	0	0	99.792	0	100	0	99.978	0	1
GCA_000582745.1	S2395	99.291	0	0	0	0	0	0	0	0	0	0	0	0	99.792	0	100	0	99.978	0	1
GCA_000626855.1	CO-41	99.409	0	0	0	0	0	99.184	0	0	0	0	0	0	0	0	0	0	0	0	1
GCA_000626955.1	21304	99.409	0	0	0	99.844	0	0	0	0	0	0	0	0	0	0	0	0	0	0	1
GCA_000747275.1	327	99.409	0	0	0	100	0	0	0	0	0	0	0	0	0	0	0	0	0	0	1
GCA_000763455.1	337	99.409	99.748	0	0	100	0	0	0	0	0	0	0	0	0	0	0	0	0	0	2
GCA_001184325.2	V1142	99.95	99.93	0	0	0	0	0	0	0	0	0	0	0	100	0	0	0	0	0	2
GCA_001297365.1	BU_W6_t1	98.463	0	0	0	0	0	0	0	0	99.362	0	0	0	100	0	0	0	0	0	2
GCA_001469015.1	1269	0	0	0	0	0	0	0	0	0	0	0	0	0	0	0	0	0	0	0	0
GCA_001680935.1	Sa12-002	0	0	0	0	0	0	0	0	0	0	0	0	0	0	0	0	0	0	0	0
GCA_001681155.1	Sa14-001	0	0	0	0	0	0	0	0	0	0	0	0	0	0	0	0	0	0	0	0
GCA_001855045.1	VB43011	99.409	99.874	0	0	100	0	98.978	0	0	0	0	0	0	0	0	0	0	0	0	3
GCA_002096985.1	698	99.95	0	0	0	0	0	0	0	0	0	0	0	0	0	0	0	0	0	0	0
GCA_002188425.1	SCPM-O-B-7906	99.409	0	0	0	0	0	0	0	0	0	0	0	0	0	0	0	0	0	0	0
GCA_002188455.1	SCPM-O-B-7905	99.409	0	0	0	0	0	0	0	0	0	0	0	0	0	0	0	0	0	0	0
GCA_002798125.1	549	99.409	99.874	0	0	0	0	0	0	0	0	0	0	0	0	0	0	0	0	0	1
GCA_002887375.1	UA825	99.882	100	0	0	0	0	0	0	0	0	0	0	0	0	0	0	0	0	0	1
GCA_002904815.1	N04_011214	99.308	0	0	0	0	0	0	0	0	0	0	0	0	100	0	0	0	0	0	1
GCA_002905535.1	B26B_160215	99.409	0	0	0	0	0	0	0	0	100	0	0	0	99.927	0	0	0	0	0	2
GCA_003038455.1	SAM-16	99.9	100	0	0	100	0	0	0	0	0	0	0	0	0	0	0	0	0	0	2
GCA_003038575.1	SAM-9	99.409	99.874	0	0	100	0	0	0	0	0	0	0	0	0	0	0	0	0	0	2
GCA_003038595.1	SAM-8	99.409	99.874	0	0	100	0	0	0	0	0	0	0	0	0	0	0	0	0	0	2
GCA_003237255.1	CM135	99.409	99.78	0	0	0	0	98.912	0	0	0	0	0	0	99.855	0	0	0	0	0	3
GCA_003237355.1	CM127	99.409	99.78	0	0	0	0	98.912	0	0	0	0	0	0	99.855	0	0	0	0	0	3
GCA_003237515.1	CM109	99.409	99.78	0	0	0	0	98.912	0	0	0	0	0	0	99.855	0	0	0	0	0	3
GCA_003238125.1	CM124	99.409	99.78	0	0	0	0	98.912	0	0	0	0	0	0	99.783	0	0	0	0	0	3
GCA_003238315.1	CM91	99.409	99.78	0	0	0	0	98.912	0	0	0	0	0	0	99.855	0	0	0	0	0	3
GCA_003238375.1	CM81	99.409	99.78	0	0	0	0	98.912	0	0	0	0	0	0	99.855	0	0	0	0	0	3
GCA_003238485.1	CM64	99.409	99.78	0	0	0	0	98.912	0	0	0	0	0	0	0	0	0	0	0	0	2
GCA_003238595.1	CM53	99.409	99.78	0	0	0	0	99.184	0	0	0	0	0	0	99.928	0	0	0	0	0	3
GCA_003238605.1	CM48	99.409	99.78	0	0	0	0	98.912	0	0	0	0	0	0	99.855	0	0	0	0	0	3
GCA_003238735.1	CM37	99.409	99.78	0	0	0	0	98.912	0	0	0	0	0	0	99.855	0	0	0	0	0	3
GCA_003238805.1	CM26	99.9	0	0	0	0	0	0	0	0	0	0	0	0	0	0	0	0	0	0	0
GCA_003238925.1	CM20	99.409	99.78	0	0	0	0	0	0	0	0	0	0	0	99.783	0	0	0	0	0	2
GCA_003238965.1	CM9	99.9	0	0	0	0	0	0	0	0	0	0	0	0	0	0	0	0	0	0	0
GCA_003239385.1	CM107	99.291	99.779	0	0	0	0	98.912	0	0	0	0	0	0	99.783	0	0	0	0	0	3
GCA_003239715.1	CM29	99.409	99.78	0	0	0	0	98.912	0	0	0	0	0	0	99.855	0	0	0	0	0	3
GCA_003239855.1	CM78	99.409	99.78	0	0	0	0	98.912	0	0	0	0	0	0	99.855	0	0	0	0	0	3
GCA_003240035.1	CM61	99.409	99.78	0	0	0	0	98.912	0	0	0	0	0	0	99.855	0	0	0	0	0	3
GCA_003240095.1	CM49	99.409	99.78	0	0	0	0	98.912	0	0	0	0	0	0	99.855	0	0	0	0	0	3
GCA_003240175.1	CM42	99.291	99.78	0	0	0	0	98.912	0	0	0	0	0	0	0	0	0	0	0	0	2
GCA_003240185.1	CM38	99.409	99.78	0	0	0	0	98.912	0	0	0	0	0	0	99.855	0	0	0	0	0	3
GCA_003336555.1	ch24	99.409	99.647	0	0	0	0	0	0	0	0	0	0	0	0	0	0	0	0	0	1
GCA_003422165.1	M6K110	99.409	0	0	0	0	0	0	0	0	0	0	0	0	0	0	0	0	0	0	0
GCA_003422665.1	M6K168	99.409	0	0	0	0	0	99.048	0	0	0	0	0	0	0	0	0	0	0	0	1
GCA_003422945.1	M6K200	99.409	100	0	0	0	0	99.863	0	0	0	0	0	0	0	0	0	0	0	0	2
GCA_003423985.1	M1KS0176_2	99.409	100	0	0	0	0	98.912	0	0	0	0	0	0	0	0	0	0	0	0	2
GCA_003424265.1	M1KS0526_1	0	0	0	0	0	0	0	0	0	0	0	0	0	0	0	0	0	0	0	0
GCA_003424305.1	M1KS0526_3	0	0	0	0	0	0	0	0	0	0	0	0	0	0	0	0	0	0	0	0
GCA_003424825.1	M6KS0176_2	99.409	100	0	0	0	0	0	0	0	0	0	0	0	0	0	0	0	0	0	1
GCA_003605265.1	Sau-2716Lar	99.409	99.78	0	0	0	0	98.912	0	0	0	0	0	0	0	0	0	0	0	0	2
GCA_003721055.1	BCH-SA-04	99.409	99.872	0	0	0	0	100	0	0	0	0	0	0	0	0	0	0	0	0	2
GCA_004167915.1	SCPM-O-B-7903	0	0	0	0	0	0	0	0	0	0	0	0	0	0	0	0	0	0	0	0
GCA_004168175.1	SCPM-O-B-7908	0	0	0	0	0	0	0	0	0	0	0	0	0	0	0	0	0	0	0	0
GCA_004328315.1	SCPM-O-B-7907	99.409	0	0	0	0	0	0	0	0	0	0	0	0	0	0	0	0	0	0	0
GCA_004328355.1	SCPM-O-B-7904	99.409	0	0	0	0	0	0	0	0	0	0	0	0	0	0	0	0	0	0	0
GCA_005047535.1	6 (A)	99.409	99.874	0	0	100	0	0	0	0	0	0	0	0	100	0	0	0	0	0	3
GCA_005048295.1	23	99.409	100	0	0	100	0	0	0	0	0	0	0	0	100	0	0	0	0	0	3
GCA_005048335.1	3 (B)	99.409	99.874	0	0	100	0	0	0	0	0	0	0	0	100	0	0	0	0	0	3
GCA_005048375.1	19	99.409	99.874	0	0	100	0	0	0	0	0	0	0	0	100	0	0	0	0	0	3
GCA_005048455.1	43	99.409	99.874	0	0	100	0	0	0	0	0	0	0	0	100	0	0	0	0	0	3
GCA_005049015.1	3 (A)	99.409	99.874	0	0	100	0	0	0	0	0	0	0	0	100	0	0	0	0	0	3
GCA_900020485.1	st1070	99.409	0	0	0	100	0	0	0	0	0	0	0	0	0	0	0	0	0	0	1
GCA_900022645.1	st1509	99.409	0	0	0	100	0	0	0	0	0	0	0	0	0	0	0	0	0	0	1
GCA_900038315.1	st314	99.291	0	0	0	100	0	99.048	0	0	0	0	0	0	0	0	0	0	0	0	2
GCA_900039205.1	st1565	99.409	0	0	0	100	0	0	0	0	0	0	0	0	0	0	0	0	0	0	1
GCA_900040355.1	st1561	99.409	0	0	0	0	0	0	0	0	0	0	0	0	0	0	0	0	0	0	0
GCA_900041185.1	st2099	99.409	0	0	0	100	0	99.184	0	0	0	0	0	0	0	0	0	0	0	0	2
GCA_900041235.1	st2374	99.173	100	0	0	0	0	99.863	0	0	0	0	0	0	100	0	0	0	0	0	3
GCA_900041785.1	st1315	99.409	0	0	0	0	0	99.048	0	0	0	0	0	0	0	0	0	0	0	0	1
GCA_900042725.1	st2375	99.173	100	0	0	0	0	99.863	0	0	0	0	0	0	0	0	0	0	0	0	2
GCA_900046035.1	st304	99.409	0	0	0	100	0	99.048	0	0	0	0	0	0	0	0	0	0	0	0	2
GCA_900046215.1	st1881	99.409	0	0	0	100	0	0	0	0	0	0	0	0	0	0	0	0	0	0	1
GCA_900057335.1	st2786	99.409	0	0	0	100	0	0	0	0	0	0	0	0	0	0	0	0	0	0	1
GCA_900098195.1	GKP138-41	0	0	0	0	0	0	0	0	0	0	0	0	0	0	0	0	0	0	0	0
GCA_900125475.1	3688STDY6124826	99.409	0	0	0	0	0	0	0	0	0	0	0	0	100	0	0	0	0	0	1
GCA_900126045.1	3688STDY6124910	99.409	0	0	0	0	0	0	0	0	0	0	0	0	100	100	0	0	0	0	2
GCA_900126415.1	3688STDY6124879	99.291	0	0	0	0	0	98.912	0	0	0	0	0	0	100	0	0	0	0	0	2
GCA_900127665.1	3688STDY6124987	99.291	0	0	0	0	0	0	0	0	0	0	0	0	100	0	0	0	0	0	1
GCA_900127805.1	3688STDY6124816	99.291	0	0	0	0	0	0	0	0	0	0	0	0	100	0	0	0	0	0	1
GCA_900128065.1	3688STDY6124940	99.409	0	0	0	0	0	0	0	0	0	0	0	0	100	0	0	0	0	0	1
GCA_900128095.1	3688STDY6124950	99.409	0	0	0	0	0	0	0	0	0	0	0	0	0	0	0	0	0	0	0
GCA_900149245.1	tirS_MRSA1	99.9	100	0	0	100	0	98.958	0	0	0	0	0	0	0	0	0	0	0	0	3
GCA_900149255.1	tirS_MRSA3	99.9	100	0	0	100	0	0	0	0	0	0	0	0	0	0	0	0	0	0	2
GCA_900457625.1	NCTC13297	99.409	0	0	0	100	0	0	0	0	0	0	0	0	0	0	0	0	0	0	1
GCA_001063885.1	169_SAUR	0	0	0	0	0	0	0	0	0	0	0	0	0	0	0	0	0	0	0	0
GCA_001921665.1	LC33	99.409	99.874	0	0	0	0	0	0	0	0	0	0	0	0	0	0	0	0	0	1
GCA_002125325.1	CFSA074	99.409	100	0	0	0	0	100	0	0	0	0	0	0	0	0	0	0	0	0	2
GCA_002572965.1	211P	0	0	0	0	0	0	0	0	0	0	0	0	0	0	0	0	0	0	0	0
GCA_002904935.1	N57_130515	99.409	0	0	0	0	0	0	0	0	0	0	0	0	0	0	0	0	0	0	0
GCA_003017755.1	0908-2002-2015	0	0	0	0	0	0	0	0	0	0	0	0	0	0	0	0	0	0	0	0
GCA_003112635.1	GUATP 6	0	0	0	0	0	0	0	0	0	0	0	0	0	0	0	0	0	0	0	0
GCA_003113915.1	GUATP 6b	0	0	0	0	0	0	0	0	0	0	0	0	0	0	0	0	0	0	0	0
GCA_003113935.1	GUATP 28	0	0	0	0	0	0	0	0	0	0	0	0	0	0	0	0	0	0	0	0
GCA_003113955.1	GUATP 28b	0	0	0	0	0	0	0	0	0	0	0	0	0	0	0	0	0	0	0	0
GCA_003417245.1	M1C027	99.409	0	0	0	0	0	0	0	0	0	0	0	0	0	0	0	0	0	0	0
GCA_003418385.1	M1C072	99.409	0	0	0	0	0	0	0	0	0	0	0	0	0	0	0	0	0	0	0
GCA_003419745.1	M1K136	99.291	0	0	0	0	0	0	0	0	0	0	0	0	0	0	0	0	0	0	0
GCA_003420105.1	M1K168	99.409	0	0	0	0	0	99.048	0	0	0	0	0	0	0	0	0	0	0	0	1
GCA_003421225.1	M6C072	99.409	0	0	0	0	0	0	0	0	0	0	0	0	0	0	0	0	0	0	0
GCA_003422085.1	M6K104	99.409	100	0	0	100	0	99.863	0	0	0	0	0	0	0	0	0	0	0	0	3
GCA_003423125.1	M6K219	99.409	100	0	0	0	0	99.863	0	0	0	0	0	0	0	0	0	0	0	0	2
GCA_003423965.1	M1KS0176_1	99.409	100	0	0	0	0	0	0	0	0	0	0	0	0	0	0	0	0	0	1
GCA_003424005.1	M1KS0260_1	99.409	100	0	0	0	0	0	0	0	0	0	0	0	0	0	0	0	0	0	1
GCA_003424025.1	M1KS0260_2	99.409	100	0	0	0	0	0	0	0	0	0	0	0	0	0	0	0	0	0	1
GCA_003424285.1	M1KS0526_2	0	0	0	0	0	0	0	0	0	0	0	0	0	0	0	0	0	0	0	0
GCA_003424845.1	M6KS0260_1	99.409	100	0	0	0	0	0	0	0	0	0	0	0	0	0	0	0	0	0	1
GCA_003424885.1	M6KS0260_3	99.409	100	0	0	0	0	0	0	0	0	0	0	0	0	0	0	0	0	0	1
GCA_003425145.1	M6KS0526_1	0	0	0	0	0	0	0	0	0	0	0	0	0	0	0	0	0	0	0	0
GCA_003724015.1	CC1-MRSA-IV	99.409	99.78	0	0	0	0	98.912	0	0	0	0	0	0	99.855	0	0	0	0	0	3
GCA_900097745.1	type strain: MRSA066	99.409	0	0	0	0	0	99.048	0	0	0	0	0	0	100	100	0	0	0	0	3
GCA_900097885.1	MSSAT94	0	0	0	0	0	0	0	0	0	0	0	0	0	0	100	0	0	0	0	1
GCA_900097905.1	MRSA012TA	99.409	0	0	0	0	0	0	0	0	0	0	0	0	0	0	0	0	0	0	0
GCA_900124805.1	3688STDY6124988	99.409	0	0	0	0	0	0	0	0	0	0	0	0	0	0	0	0	0	0	0
GCA_900125785.1	3688STDY6124865	99.409	0	0	0	0	0	0	0	0	0	0	0	0	100	0	0	0	0	0	1
GCA_900126535.1	3688STDY6125060	99.409	0	0	0	0	0	0	0	0	0	0	0	0	0	0	0	0	0	0	0
GCA_900127825.1	3688STDY6124839	99.291	0	0	0	0	0	0	0	0	0	0	0	0	0	0	0	0	0	0	0
GCA_900149335.1	ST20110167	99.409	0	0	0	100	0	0	0	0	0	0	0	0	0	0	0	0	0	0	1
GCA_900250415.1	H1446	99.409	99.78	0	0	0	0	98.912	0	0	0	0	0	0	99.855	0	0	0	0	0	3
GCA_900250665.1	H1688	99.409	99.874	0	0	100	0	0	0	0	0	0	0	0	100	0	0	0	0	0	3
GCA_900250795.1	HL452	99.409	99.779	0	0	0	0	98.912	0	0	0	0	0	0	99.855	0	0	0	0	0	3
GCA_900250985.1	M2885	99.409	99.748	0	0	100	0	0	0	0	0	0	0	0	100	0	0	0	0	0	3
GCA_900251105.1	M3117	99.409	99.78	0	0	0	0	98.912	0	0	0	0	0	0	99.855	0	0	0	0	0	3
GCA_900251355.1	M3251	99.9	100	0	0	100	0	0	0	0	0	0	0	0	0	0	0	0	0	0	2
GCA_900251445.1	M3496	99.409	100	0	0	100	0	99.046	0	0	0	0	0	0	100	0	0	0	0	0	4
GCA_900251525.1	M3551	99.291	0	0	0	100	0	0	0	0	0	0	0	0	0	0	0	0	0	0	1
GCA_900252035.1	M3998	99.409	99.78	0	0	0	0	98.912	0	0	0	0	0	0	99.855	0	0	0	0	0	3
GCA_900252205.1	RH259	99.409	99.78	0	0	0	0	98.912	0	0	0	0	0	0	99.855	0	0	0	0	0	3
GCA_004368035.1	2288	99.95	0	0	0	0	0	0	0	0	0	0	0	0	99.783	0	0	0	0	0	1
GCA_000512505.1	MUF256	99.058	0	0	0	99.844	0	0	0	0	0	0	0	0	0	100	0	0	0	0	2
GCA_000512545.1	MUM475	99.057	99.874	0	0	100	0	98.291	0	0	0	0	0	0	0	0	0	0	0	0	3

## Sheet: CC30
Assembly	Strain	beta-lactam	aminoglycoside	colistin	fosfomycin	fusidicacid	glycopeptide	macrolide	nitroimidazole	oxazolidinone	phenicol	quinolone	rifampicin	sulphonamide	tetracycline	trimethoprim	ardA-H2	ardA-H1	Tn916	Tn5801	Resistance without bl
GCA_000011505.1	MRSA252	98.463	100	0	0	0	0	100	0	0	0	0	0	0	0	0	0	0	0	0	2
GCA_000159535.2	TCH60	98.463	0	0	0	0	0	0	0	0	0	0	0	0	0	0	0	0	0	0	0
GCA_000160335.2	55/2053	98.463	0	0	0	0	0	0	0	0	0	0	0	0	0	0	0	0	0	0	0
GCA_000756205.1	ATCC 25923	0	0	0	0	0	0	0	0	0	0	0	0	0	0	0	0	0	0	0	0
GCA_000772025.1	FORC_001	98.463	100	0	0	0	0	100	0	0	0	0	0	0	0	0	0	0	0	0	2
GCA_000953255.1	ILRI_Eymole1/1	0	0	0	0	0	0	0	0	0	0	0	0	0	0	0	0	0	0	0	0
GCA_001018975.2	NRS143	98.463	0	0	0	0	0	0	0	0	0	0	0	0	0	0	0	0	0	0	0
GCA_001019395.2	NRS484	0	0	0	0	0	0	0	0	0	0	0	0	0	0	0	0	0	0	0	0
GCA_001956755.1	SJTUF_J27	0	0	0	0	0	0	99.746	0	0	0	0	0	0	0	0	0	0	0	0	1
GCA_002202075.1	Seattle 1945	0	0	0	0	0	0	0	0	0	0	0	0	0	0	0	0	0	0	0	0
GCA_002202095.1	Seattle 1945	0	0	0	0	0	0	0	0	0	0	0	0	0	0	0	0	0	0	0	0
GCA_002633785.1	CFSAN007847	98.345	0	0	0	0	0	0	0	0	0	0	0	0	0	0	0	0	0	0	0
GCA_003030065.1	CFSAN018749	98.345	99.647	0	0	0	0	99.81	0	0	0	0	0	0	0	0	0	0	0	0	2
GCA_003031425.1	CFSAN007896	98.463	0	0	0	0	0	0	0	0	0	0	0	0	0	0	0	0	0	0	0
GCA_003193745.1	AR_0470	95.863	100	0	0	0	0	100	0	0	0	0	0	0	95.313	0	100	0	97.943	0	3
GCA_003354625.1	468	98.345	0	0	0	0	0	0	0	0	0	0	0	0	0	0	0	0	0	0	0
GCA_003354685.1	277	98.347	0	0	0	0	0	0	0	0	0	0	0	0	0	0	0	0	0	0	0
GCA_003354725.1	143	98.345	0	0	0	0	0	0	0	0	0	0	0	0	0	0	0	0	0	0	0
GCA_003354745.1	466	98.345	0	0	0	0	0	0	0	0	0	0	0	0	0	0	0	0	0	0	0
GCA_003354785.1	85	98.347	0	0	0	0	0	0	0	0	0	0	0	0	0	0	0	0	0	0	0
GCA_003827915.1	FDAARGOS_504	98.463	99.78	0	0	0	0	99.727	0	0	0	0	0	0	99.583	0	100	0	99.882	0	3
GCA_003855575.1	80wphwpl_v1	0	0	0	0	0	0	0	0	0	0	0	0	0	0	0	0	0	0	0	0
GCA_003944865.1	80wphwpl	0	0	0	0	0	0	0	0	0	0	0	0	0	0	0	0	0	0	0	0
GCA_004421085.1	04-002	98.463	0	0	0	0	0	0	0	0	0	0	0	0	0	0	0	0	0	0	0
GCA_004771335.1	O217	95.981	0	0	0	0	0	0	0	0	0	0	0	0	0	0	0	0	0	0	0
GCA_900478245.1	NCTC13277	98.463	100	0	0	0	0	100	0	0	0	0	0	0	0	0	0	0	0	0	2
GCA_900635335.1	NCTC11965	98.463	0	0	0	0	0	0	0	0	0	0	0	0	0	0	0	0	0	0	0
GCA_900637155.1	NCTC13811	98.463	100	0	0	0	0	100	0	0	0	0	0	0	0	0	0	0	0	0	2
GCA_003194105.1	13420	99.409	0	0	0	0	0	0	0	0	0	0	0	0	0	0	0	0	0	0	0
GCA_003194185.1	0201753-2	98.463	0	0	0	0	0	0	0	0	0	0	0	0	0	0	0	0	0	0	0
GCA_000160195.1	MN8	98.463	0	0	0	0	0	0	0	0	0	0	0	0	0	0	0	0	0	0	0
GCA_000160355.1	65-1322	98.463	100	0	0	0	0	100	0	0	0	0	0	0	0	0	0	0	0	0	2
GCA_000160375.1	68-397	97.991	100	0	0	0	0	100	0	0	0	0	0	0	0	0	0	0	0	0	2
GCA_000160395.1	E1410	98.463	0	0	0	0	0	0	0	0	0	0	0	0	0	0	0	0	0	0	0
GCA_000160415.1	M876	98.463	0	0	0	0	0	0	0	0	0	0	0	0	0	0	0	0	0	0	0
GCA_000162595.1	C101	98.463	0	0	0	0	0	0	0	0	0	0	0	0	100	0	0	0	0	0	1
GCA_000162615.1	C427	95.863	0	0	0	0	0	0	0	0	0	0	0	0	0	0	0	0	0	0	0
GCA_000162675.1	M1015	98.463	0	0	0	0	0	0	0	0	0	0	0	0	0	0	0	0	0	0	0
GCA_000162695.1	M899	98.463	0	0	0	0	0	0	0	0	0	0	0	0	100	0	0	0	0	0	1
GCA_000162715.1	WBG10049	98.463	0	0	0	0	0	0	0	0	0	0	0	0	0	0	0	0	0	0	0
GCA_000162735.1	WW2703/97	98.463	0	0	0	0	0	0	0	0	0	0	0	0	0	0	0	0	0	0	0
GCA_000162795.1	M809	98.463	0	0	0	0	0	0	0	0	0	0	0	0	0	0	0	0	0	0	0
GCA_000162815.1	58-424	98.463	100	0	0	0	0	100	0	0	0	0	0	0	0	0	0	0	0	0	2
GCA_000162835.1	Btn1260	98.463	0	0	0	0	0	0	0	0	0	0	0	0	0	0	0	0	0	0	0
GCA_000162855.1	C160	98.463	0	0	0	0	0	0	0	0	0	0	0	0	0	0	0	0	0	0	0
GCA_000163335.1	A017934/97	98.463	0	0	0	0	0	0	0	0	0	0	0	0	0	0	0	0	0	0	0
GCA_000163575.1	EMRSA16	98.463	100	0	0	0	0	100	0	0	0	0	0	0	0	0	0	0	0	0	2
GCA_000261165.1	LCT-SA112	0	0	0	0	0	0	0	0	0	0	0	0	0	0	0	0	0	0	0	0
GCA_000361085.1	M0408	95.863	100	0	0	0	0	99.863	0	0	0	0	0	0	95.313	0	100	0	97.97	0	3
GCA_000361385.1	M0513	98.463	100	0	0	0	0	100	0	0	0	0	0	0	0	0	0	0	0	0	2
GCA_000362285.1	M0946	98.463	99.869	0	0	0	0	100	0	0	0	0	0	0	0	0	0	0	0	0	2
GCA_000362505.1	M1034	98.463	100	0	0	0	0	0	0	0	0	0	0	0	0	0	0	0	0	0	1
GCA_000363165.1	M1256	98.463	0	0	0	0	0	0	0	0	0	0	0	0	0	0	0	0	0	0	0
GCA_000439835.1	LCT-SA67	0	0	0	0	0	0	0	0	0	0	0	0	0	0	0	0	0	0	0	0
GCA_000529835.1	M0594	98.463	100	0	0	0	0	100	0	0	0	0	0	0	0	0	0	0	0	0	2
GCA_000538595.1	WMCS6019	98.463	0	0	0	0	0	0	0	0	0	0	0	0	0	0	0	0	0	0	0
GCA_000542355.1	UCIM6119	99.9	100	0	0	0	0	100	0	0	0	0	0	0	0	0	0	0	0	0	2
GCA_000543045.1	KINW6056	99.9	100	0	0	0	0	100	0	0	0	0	0	0	0	0	0	0	0	0	2
GCA_000543125.1	KINW6066	99.9	100	0	0	0	0	100	0	0	0	0	0	0	0	0	0	0	0	0	2
GCA_000555145.1	M0359	98.463	100	0	0	0	0	100	0	0	0	0	0	0	0	0	0	0	0	0	2
GCA_000555905.1	M0426	98.463	100	0	0	0	0	100	0	0	0	0	0	0	0	0	0	0	0	0	2
GCA_000556025.1	M0437	98.463	100	0	0	0	0	100	0	0	0	0	0	0	0	0	0	0	0	0	2
GCA_000556385.1	M0465	98.463	100	0	0	0	0	100	0	0	0	0	0	0	0	0	0	0	0	0	2
GCA_000556985.1	M0522	98.463	100	0	0	0	0	100	0	0	0	0	0	0	0	0	0	0	0	0	2
GCA_000557185.1	M0541	98.463	100	0	0	0	0	100	0	0	0	0	0	0	0	0	0	0	0	0	2
GCA_000557365.1	M0552	98.463	100	0	0	0	0	100	0	0	0	0	0	0	0	0	0	0	0	0	2
GCA_000557845.1	M0590	98.463	100	0	0	0	0	100	0	0	0	0	0	0	0	0	0	0	0	0	2
GCA_000569635.1	T44444	98.463	0	0	0	0	0	0	0	0	0	0	0	0	0	0	0	0	0	0	0
GCA_000578715.1	T86574	98.463	0	0	0	0	0	0	0	0	0	0	0	0	0	0	0	0	0	0	0
GCA_000579035.1	F82600	98.463	0	0	0	0	0	0	0	0	0	0	0	0	0	0	0	0	0	0	0
GCA_000604765.1	F42556	98.463	0	0	0	0	0	0	0	0	0	0	0	0	0	0	0	0	0	0	0
GCA_000605705.1	T55954	98.463	0	0	0	0	0	0	0	0	0	0	0	0	0	0	0	0	0	0	0
GCA_000645515.1	VET0889S	98.463	0	0	0	0	0	0	0	0	0	0	0	0	0	0	0	0	0	0	0
GCA_000193835.2	CGS00	98.463	100	0	0	0	0	100	0	0	0	0	0	0	0	0	0	0	0	0	2
GCA_000221845.2	21195	0	0	0	0	0	0	0	0	0	0	0	0	0	0	0	0	0	0	0	0
GCA_000242515.2	21264	98.463	0	0	0	0	0	0	0	0	0	0	0	0	0	0	0	0	0	0	0
GCA_000245575.2	21342	98.463	0	0	0	0	0	0	0	0	0	0	0	0	0	0	0	0	0	0	0
GCA_000245615.2	21345	98.463	0	0	0	0	0	0	0	0	0	0	0	0	0	0	0	0	0	0	0
GCA_000248535.2	CIG1214	98.463	100	0	0	0	0	100	0	0	0	0	0	0	0	0	0	0	0	0	2
GCA_000248555.3	CIG1242	98.463	100	0	0	0	0	99.863	0	0	0	0	0	0	0	0	0	0	0	0	2
GCA_000248575.2	CIG1500	98.463	100	0	0	0	0	100	0	0	0	0	0	0	0	0	0	0	0	0	2
GCA_000248595.2	CIG1605	98.463	100	0	0	0	0	100	0	0	0	0	0	0	0	0	0	0	0	0	2
GCA_000248735.2	CIG1176	98.463	100	0	0	0	0	100	0	0	0	0	0	0	0	0	0	0	0	0	2
GCA_000248775.2	CIG1233	98.463	100	0	0	0	0	100	0	0	0	0	0	0	0	0	0	0	0	0	2
GCA_000248875.2	CIG1267	98.345	100	0	0	0	0	100	0	0	0	0	0	0	0	0	0	0	0	0	2
GCA_000248895.2	CIG149	98.345	100	0	0	0	0	100	0	0	0	0	0	0	0	0	0	0	0	0	2
GCA_000248955.2	CIGC341D	98.463	100	0	0	0	0	100	0	0	0	0	0	0	0	0	0	0	0	0	2
GCA_000307695.1	M2	98.229	99.78	0	0	0	0	99.863	0	0	0	0	0	0	99.583	0	100	0	99.882	0	3
GCA_000401455.1	122051	98.463	0	0	0	0	0	0	0	0	0	0	0	0	0	0	0	0	0	0	0
GCA_000577595.1	S2397	99.291	0	0	0	0	0	0	0	0	0	0	0	0	0	0	0	0	0	0	0
GCA_000596405.1	DAR5867	98.463	0	0	0	0	0	0	0	0	0	0	0	0	0	0	0	0	0	0	0
GCA_000602045.1	T16600	0	0	0	0	0	0	0	0	0	0	0	0	0	0	0	0	0	0	0	0
GCA_000626915.1	21230	98.463	0	0	0	0	0	0	0	0	0	0	0	0	0	0	0	0	0	0	0
GCA_000626935.1	21275	98.463	0	0	0	0	0	0	0	0	0	0	0	0	0	0	0	0	0	0	0
GCA_000708405.1	SA10-LAU	98.463	0	0	0	0	0	0	0	0	0	0	0	0	0	0	0	0	0	0	0
GCA_000708425.1	SA11-LAU	98.463	0	0	0	0	0	0	0	0	0	0	0	0	0	0	0	0	0	0	0
GCA_000739205.1	NGS-ED-1006	95.745	0	0	0	0	0	0	0	0	0	0	0	0	0	0	0	0	0	0	0
GCA_000877915.1	SA-260	98.463	0	0	0	0	0	0	0	0	0	0	0	0	0	0	0	0	0	0	0
GCA_000878025.1	SA-022	98.463	0	0	0	0	0	0	0	0	0	0	0	0	0	0	0	0	0	0	0
GCA_001019175.2	FDAARGOS_45	98.463	100	0	0	0	0	100	0	0	0	0	0	0	0	0	0	0	0	0	2
GCA_001019455.2	FDAARGOS_32	0	0	0	0	0	0	0	0	0	0	0	0	0	0	0	0	0	0	0	0
GCA_001026765.1	B6	99.409	0	0	0	0	0	0	0	0	0	0	0	0	0	0	0	0	0	0	0
GCA_001060125.1	103_SAUR	98.463	0	0	0	0	0	0	0	0	0	0	0	0	0	0	0	0	0	0	0
GCA_001061355.1	1257_SAUR	98.463	100	0	0	0	0	100	0	0	0	0	0	0	0	0	0	0	0	0	2
GCA_001062475.1	1258_SAUR	98.463	100	0	0	0	0	100	0	0	0	0	0	0	0	0	0	0	0	0	2
GCA_001062555.1	1264_SAUR	98.463	100	0	0	0	0	100	0	0	0	0	0	0	0	0	0	0	0	0	2
GCA_001065445.1	571_SAUR	98.463	0	0	0	0	0	0	0	0	0	0	0	0	0	0	0	0	0	0	0
GCA_001281605.1	S54F9	0	0	0	0	0	0	99.81	0	0	0	0	0	0	0	0	0	0	0	0	1
GCA_001310915.1	JCM 2413	0	0	0	0	0	0	0	0	0	0	0	0	0	0	0	0	0	0	0	0
GCA_001411605.1	CC022	99.409	0	0	0	0	0	0	0	0	0	0	0	0	0	0	0	0	0	0	0
GCA_001411685.1	CC169	99.409	0	0	0	0	0	0	0	0	0	0	0	0	0	0	0	0	0	0	0
GCA_001639185.1	SCPM-O-B-7438	98.463	0	0	0	0	0	0	0	0	0	0	0	0	0	0	0	0	0	0	0
GCA_001639195.1	SCPM-O-B-7779	98.463	0	0	0	0	0	0	0	0	0	0	0	0	0	0	0	0	0	0	0
GCA_001639205.1	SCPM-O-B-7439	98.463	0	0	0	0	0	0	0	0	0	0	0	0	0	0	0	0	0	0	0
GCA_001639225.1	SCPM-O-B-7778	98.463	0	0	0	0	0	0	0	0	0	0	0	0	0	0	0	0	0	0	0
GCA_001899925.1	SA_107	98.463	0	0	0	0	0	0	0	0	0	0	0	0	0	0	0	0	0	0	0
GCA_001900045.1	SA_80001	98.463	0	0	0	0	0	0	0	0	0	0	0	0	0	0	0	0	0	0	0
GCA_002104815.1	V13/2/439	99.95	0	0	0	0	0	0	0	0	0	0	0	0	0	0	0	0	0	0	0
GCA_002135105.1	VB4283	99.409	99.874	0	0	0	0	98.909	0	0	0	0	0	0	0	100	0	0	0	0	3
GCA_002221905.1	ABKWT	98.463	100	0	0	0	0	100	0	0	0	0	0	0	98.438	0	0	0	0	0	3
GCA_002250865.1	ABFQX	98.463	100	0	0	0	0	100	0	0	0	0	0	0	0	0	0	0	0	0	2
GCA_002260445.1	UV1167	98.463	99.78	0	0	0	0	99.863	0	0	0	0	0	0	99.583	0	100	0	0	0	3
GCA_002267845.1	UA939	98.463	0	0	0	0	0	0	0	0	0	0	0	0	0	0	0	0	0	0	0
GCA_002268105.1	UA923	98.463	0	0	0	0	0	0	0	0	0	0	0	0	0	0	0	0	0	0	0
GCA_002268135.1	UA935	98.463	0	0	0	0	0	0	0	0	0	0	0	0	0	0	0	0	0	0	0
GCA_002574055.1	HD1410	98.463	0	0	0	0	0	0	0	0	0	0	0	0	0	0	0	0	0	0	0
GCA_002884555.1	UMB0910	95.626	100	0	0	0	0	100	0	0	0	0	0	0	0	0	0	0	0	0	2
GCA_002887345.1	UA770	98.463	0	0	0	0	0	0	0	0	0	0	0	0	0	0	0	0	0	0	0
GCA_002887395.1	UA845	98.463	0	0	0	0	0	0	0	0	0	0	0	0	0	0	0	0	0	0	0
GCA_002887445.1	UV1166	98.463	99.78	0	0	0	0	99.863	0	0	0	0	0	0	99.583	0	100	0	0	0	3
GCA_003017305.1	25390-1	98.463	0	0	0	0	0	0	0	0	0	0	0	0	0	0	0	0	0	0	0
GCA_003017395.1	0201753-1	98.463	0	0	0	0	0	0	0	0	0	0	0	0	0	0	0	0	0	0	0
GCA_003017475.1	102220019-2	98.463	0	0	0	0	0	0	0	0	0	0	0	0	0	0	0	0	0	0	0
GCA_003017535.1	22265-1	98.463	0	0	0	0	0	0	0	0	0	0	0	0	0	0	0	0	0	0	0
GCA_003038375.1	SAM-15	98.463	100	0	0	0	0	99.863	0	0	0	0	0	0	0	0	0	0	0	0	2
GCA_003038465.1	SAM-14	98.463	100	0	0	0	0	99.863	0	0	0	0	0	0	0	0	0	0	0	0	2
GCA_003052325.1	Sa02	95.626	100	0	0	0	0	100	0	0	0	0	0	0	0	0	0	0	0	0	2
GCA_003052335.1	Sa03	95.626	100	0	0	0	0	100	0	0	0	0	0	0	0	0	0	0	0	0	2
GCA_003052445.1	ATCC 43300	95.626	100	0	0	0	0	100	0	0	0	0	0	0	0	0	0	0	0	0	2
GCA_003236225.1	SAUR1516	98.463	0	0	0	0	0	0	0	0	0	0	0	0	0	0	0	0	0	0	0
GCA_003236765.1	CM178	98.463	100	0	0	0	0	100	0	0	0	0	0	0	0	0	0	0	0	0	2
GCA_003236895.1	CM168	98.463	0	0	0	0	0	0	0	0	0	0	0	0	0	0	0	0	0	0	0
GCA_003237205.1	CM143	99.409	100	0	0	0	0	99.177	0	0	0	0	0	0	99.855	0	0	0	0	0	3
GCA_003237495.1	CM113	99.409	0	0	0	0	0	0	0	0	0	0	0	0	0	0	0	0	0	0	0
GCA_003237675.1	CM92	98.463	0	0	0	0	0	0	0	0	0	0	0	0	0	0	0	0	0	0	0
GCA_003237865.1	CM171	98.345	0	0	0	0	0	0	0	0	0	0	0	0	0	0	0	0	0	0	0
GCA_003238345.1	CM86	98.463	0	0	0	0	0	0	0	0	0	0	0	0	0	0	0	0	0	0	0
GCA_003239125.1	CM180	99.409	100	0	0	0	0	99.177	0	0	0	0	0	0	100	99.598	0	0	0	0	4
GCA_003239215.1	CM150	0	0	0	0	0	0	0	0	0	0	0	0	0	0	0	0	0	0	0	0
GCA_003239895.1	CM76	98.345	100	0	0	0	0	99.046	0	0	0	0	0	0	0	0	0	0	0	0	2
GCA_003263455.1	UAMS-1	98.463	0	0	0	0	0	0	0	0	0	0	0	0	0	0	0	0	0	0	0
GCA_003403155.1	AFIPCBER_B_8.4	0	0	0	0	0	0	0	0	0	0	0	0	0	0	0	0	0	0	0	0
GCA_003420245.1	M1K194	98.463	100	0	0	0	0	99.863	0	0	0	0	0	0	0	0	0	0	0	0	2
GCA_003421325.1	M6K018	98.463	100	0	0	0	0	100	0	0	0	0	0	0	0	0	0	0	0	0	2
GCA_003423505.1	M6K223	98.463	100	0	0	0	0	100	0	0	0	0	0	0	0	0	0	0	0	0	2
GCA_003427075.1	M1C042	98.463	100	0	0	0	0	99.863	0	0	0	0	0	0	0	0	0	0	0	0	2
GCA_003605235.1	Sau-3298Lar	98.463	100	0	0	0	0	99.863	0	0	0	0	0	0	0	0	0	0	0	0	2
GCA_003668675.1	ZH04	98.463	0	0	0	0	0	0	0	0	0	0	0	0	0	0	0	0	0	0	0
GCA_003720415.1	CFBR-172	98.171	100	0	0	0	0	99.727	0	0	0	0	0	0	0	0	0	0	0	0	2
GCA_003720605.1	CFBR-322	98.463	100	0	0	0	0	100	0	0	0	0	0	0	0	0	0	0	0	0	2
GCA_003720655.1	CFBR-309	95.626	0	0	0	0	0	99.456	0	0	0	0	0	0	98.438	0	0	0	0	0	2
GCA_003720915.1	BCH-SA-11	98.463	100	0	0	0	0	100	0	0	0	0	0	0	0	0	0	0	0	0	2
GCA_003721005.1	BCH-SA-08	98.463	100	0	0	0	0	100	0	0	0	0	0	0	0	0	0	0	0	0	2
GCA_003813605.1	G1607	98.463	0	0	0	0	0	0	0	0	0	0	0	0	0	0	0	0	0	0	0
GCA_004295725.1	RUH-32	99.409	100	0	0	99.844	0	99.177	0	0	0	0	0	0	100	100	0	0	0	0	5
GCA_005146265.1	18	99.291	0	0	0	0	0	0	0	0	0	0	0	0	0	0	0	0	0	0	0
GCA_900017495.1	st500	98.463	100	0	0	0	0	100	0	0	0	0	0	0	0	0	0	0	0	0	2
GCA_900017575.1	st1013	98.463	100	0	0	0	0	100	0	0	0	0	0	0	0	0	0	0	0	0	2
GCA_900017595.1	st1445	98.345	100	0	0	0	0	100	0	0	0	0	0	0	0	0	0	0	0	0	2
GCA_900017655.1	st2543	98.463	100	0	0	0	0	100	0	0	0	0	0	0	0	0	0	0	0	0	2
GCA_900018035.1	st1027	99.95	100	0	0	0	0	100	0	0	0	0	0	0	0	0	0	0	0	0	2
GCA_900018065.1	st1066	98.463	100	0	0	0	0	100	0	0	0	0	0	0	0	0	0	0	0	0	2
GCA_900018125.1	st1203	98.463	100	0	0	0	0	100	0	0	0	0	0	0	0	0	0	0	0	0	2
GCA_900018135.1	st1227	98.463	100	0	0	0	0	100	0	0	0	0	0	0	0	0	0	0	0	0	2
GCA_900018235.1	st1309	98.463	100	0	0	100	0	100	0	0	0	0	0	0	0	0	0	0	0	0	3
GCA_900018295.1	st1434	98.463	100	0	0	0	0	100	0	0	0	0	0	0	0	0	0	0	0	0	2
GCA_900018315.1	st1460	98.463	100	0	0	0	0	100	0	0	0	0	0	0	99.792	0	100	0	99.983	0	3
GCA_900018705.1	st331	98.463	100	0	0	0	0	100	0	0	0	0	0	0	0	0	0	0	0	0	2
GCA_900018715.1	st338	98.463	100	0	0	0	0	100	0	0	0	0	0	0	0	0	0	0	0	0	2
GCA_900019095.1	st112	98.463	100	0	0	100	0	100	0	0	0	0	0	0	0	0	0	0	0	0	3
GCA_900019165.1	st711	98.463	100	0	0	0	0	100	0	0	0	0	0	0	0	0	0	0	0	0	2
GCA_900019185.1	st973	99.95	100	0	0	0	0	100	0	0	0	0	0	0	0	0	0	0	0	0	2
GCA_900020215.1	st612	98.463	100	0	0	0	0	100	0	0	0	0	0	0	0	0	0	0	0	0	2
GCA_900020235.1	st1376	98.463	100	0	0	0	0	100	0	0	0	0	0	0	0	0	0	0	0	0	2
GCA_900020445.1	st1607	99.95	100	0	0	0	0	100	0	0	0	0	0	0	0	0	0	0	0	0	2
GCA_900022575.1	st428	98.463	100	0	0	0	0	100	0	0	0	0	0	0	0	0	0	0	0	0	2
GCA_900022655.1	st1709	98.463	100	0	0	0	0	100	0	0	0	0	0	0	0	0	0	0	0	0	2
GCA_900022665.1	st1728	98.582	100	0	0	0	0	100	0	0	0	0	0	0	0	0	0	0	0	0	2
GCA_900031665.1	st2149	98.345	100	0	0	0	0	100	0	0	0	0	0	0	0	0	0	0	0	0	2
GCA_900033765.1	st847	98.463	100	0	0	0	0	100	0	0	0	0	0	0	0	0	0	0	0	0	2
GCA_900035735.1	st309	98.463	100	0	0	100	0	100	0	0	0	0	0	0	0	0	0	0	0	0	3
GCA_900035745.1	st306	98.463	100	0	0	100	0	100	0	0	0	0	0	0	0	0	0	0	0	0	3
GCA_900035835.1	st523	98.463	100	0	0	0	0	100	0	0	0	0	0	0	0	0	0	0	0	0	2
GCA_900035845.1	st569	98.345	100	0	0	0	0	100	0	0	0	0	0	0	0	0	0	0	0	0	2
GCA_900035875.1	st653	98.463	100	0	0	0	0	100	0	0	0	0	0	0	0	0	0	0	0	0	2
GCA_900036425.1	st2534	98.463	100	0	0	0	0	100	0	0	0	0	0	0	0	0	0	0	0	0	2
GCA_900036935.1	st855	97.872	100	0	0	0	0	100	0	0	0	0	0	0	0	0	0	0	0	0	2
GCA_900037645.1	st762	98.463	100	0	0	0	0	100	0	0	0	0	0	0	0	0	0	0	0	0	2
GCA_900037715.1	st677	98.463	100	0	0	0	0	100	0	0	0	0	0	0	0	0	0	0	0	0	2
GCA_900037765.1	st899	98.463	100	0	0	0	0	100	0	0	0	0	0	0	0	0	0	0	0	0	2
GCA_900038095.1	st842	98.345	100	0	0	0	0	100	0	0	0	0	0	0	0	0	0	0	0	0	2
GCA_900038255.1	st232	99.95	100	0	0	0	0	100	0	0	0	0	0	0	0	0	0	0	0	0	2
GCA_900038285.1	st241	98.463	100	0	0	0	0	100	0	0	0	0	0	0	0	0	0	0	0	0	2
GCA_900038345.1	st438	98.463	100	0	0	0	0	100	0	0	0	0	0	0	0	0	0	0	0	0	2
GCA_900038365.1	st554	98.463	100	0	0	0	0	100	0	0	0	0	0	0	96.188	100	0	100	0	99.82	4
GCA_900038375.1	st565	98.345	100	0	0	0	0	100	0	0	0	0	0	0	0	0	0	0	0	0	2
GCA_900038405.1	st693	98.463	100	0	0	0	0	100	0	0	0	0	0	0	0	0	0	0	0	0	2
GCA_900038735.1	st408	98.463	100	0	0	0	0	100	0	0	0	0	0	0	0	0	0	0	0	0	2
GCA_900038785.1	st564	98.345	100	0	0	0	0	100	0	0	0	0	0	0	0	0	0	0	0	0	2
GCA_900038795.1	st574	98.463	100	0	0	0	0	100	0	0	0	0	0	0	0	0	0	0	0	0	2
GCA_900038805.1	st823	98.463	100	0	0	0	0	100	0	0	0	0	0	0	0	0	0	0	0	0	2
GCA_900038815.1	st36	98.463	100	0	0	0	0	100	0	0	0	0	0	0	0	0	0	0	0	0	2
GCA_900038845.1	st247	98.463	100	0	0	0	0	100	0	0	0	0	0	0	0	0	0	0	0	0	2
GCA_900038855.1	st264	98.463	100	0	0	0	0	100	0	0	0	0	0	0	0	0	0	0	0	0	2
GCA_900038865.1	st411	98.463	100	0	0	0	0	100	0	0	0	0	0	0	0	0	0	0	0	0	2
GCA_900038955.1	st1072	98.345	100	0	0	0	0	100	0	0	0	0	0	0	0	0	0	0	0	0	2
GCA_900039075.1	st1455	97.872	100	0	0	0	0	100	0	0	0	0	0	0	0	0	0	0	0	0	2
GCA_900039105.1	st1483	98.463	100	0	0	0	0	100	0	0	0	0	0	0	0	0	0	0	0	0	2
GCA_900039665.1	st336	98.463	100	0	0	0	0	100	0	0	0	0	0	0	0	0	0	0	0	0	2
GCA_900040075.1	st557	98.463	100	0	0	100	0	100	0	0	0	0	0	0	0	0	0	0	0	0	3
GCA_900040095.1	st162	98.463	99.869	0	0	0	0	100	0	0	0	0	0	0	0	0	0	0	0	0	2
GCA_900040105.1	st177	98.463	100	0	0	0	0	100	0	0	0	0	0	0	0	0	0	0	0	0	2
GCA_900040165.1	st1333	98.463	100	0	0	0	0	100	0	0	0	0	0	0	0	0	0	0	0	0	2
GCA_900040275.1	st1399	98.463	100	0	0	0	0	100	0	0	0	0	0	0	0	0	0	0	0	0	2
GCA_900040305.1	st1446	98.345	100	0	0	0	0	100	0	0	0	0	0	0	0	0	0	0	0	0	2
GCA_900040315.1	st1466	98.463	100	0	0	0	0	100	0	0	0	0	0	0	0	0	0	0	0	0	2
GCA_900040395.1	st698	99.409	99.78	0	0	0	0	0	0	0	0	0	0	0	0	100	0	0	0	0	2
GCA_900040405.1	st718	97.872	100	0	0	0	0	100	0	0	0	0	0	0	0	0	0	0	0	0	2
GCA_900040565.1	st2007	98.463	99.869	0	0	0	0	100	0	0	0	0	0	0	0	0	0	0	0	0	2
GCA_900040835.1	st233	98.463	100	0	0	0	0	100	0	0	0	0	0	0	0	0	0	0	0	0	2
GCA_900040855.1	st558	98.463	100	0	0	100	0	100	0	0	0	0	0	0	0	0	0	0	0	0	3
GCA_900041045.1	st1780	98.463	100	0	0	0	0	100	0	0	0	0	0	0	0	0	0	0	0	0	2
GCA_900041145.1	st2002	98.463	99.869	0	0	0	0	100	0	0	0	0	0	0	0	0	0	0	0	0	2
GCA_900041165.1	st2046	98.463	100	0	0	0	0	100	0	0	0	0	0	0	100	0	0	0	0	0	3
GCA_900041805.1	st1643	98.463	100	0	0	0	0	100	0	0	0	0	0	0	0	0	0	0	0	0	2
GCA_900041845.1	st1684	98.463	100	0	0	0	0	100	0	0	0	0	0	0	0	0	0	0	0	0	2
GCA_900041885.1	st168	98.463	99.869	0	0	0	0	100	0	0	0	0	0	0	0	0	0	0	0	0	2
GCA_900041965.1	st886	98.582	100	0	0	0	0	100	0	0	0	0	0	0	0	0	0	0	0	0	2
GCA_900042125.1	st1318	98.463	100	0	0	0	0	100	0	0	0	0	0	0	0	0	0	0	0	0	2
GCA_900042145.1	st1335	98.463	100	0	0	0	0	100	0	0	0	0	0	0	0	0	0	0	0	0	2
GCA_900042255.1	st1690	98.463	100	0	0	0	0	100	0	0	0	0	0	0	0	0	0	0	0	0	2
GCA_900042625.1	st2209	99.95	100	0	0	0	0	100	0	0	0	0	0	0	0	0	0	0	0	0	2
GCA_900042655.1	st2271	98.463	100	0	0	0	0	100	0	0	0	0	0	0	0	0	0	0	0	0	2
GCA_900043635.1	st1570	98.463	0	0	0	0	0	0	0	0	0	0	0	0	0	0	0	0	0	0	0
GCA_900044405.1	st127	98.463	100	0	0	0	0	100	0	0	0	0	0	0	0	0	0	0	0	0	2
GCA_900044495.1	st765	98.463	100	0	0	0	0	100	0	0	0	0	0	0	0	0	0	0	0	0	2
GCA_900044515.1	st827	98.463	100	0	0	0	0	100	0	0	0	0	0	0	0	0	0	0	0	0	2
GCA_900044535.1	st1397	98.463	100	0	0	0	0	100	0	0	0	0	0	0	0	0	0	0	0	0	2
GCA_900044565.1	st1487	98.463	100	0	0	0	0	100	0	0	0	0	0	0	0	0	0	0	0	0	2
GCA_900044615.1	st2245	98.463	100	0	0	0	0	100	0	0	0	0	0	0	0	0	0	0	0	0	2
GCA_900044885.1	st274	97.872	100	0	0	0	0	100	0	0	0	0	0	0	0	0	0	0	0	0	2
GCA_900044925.1	st642	98.463	100	0	0	0	0	100	0	0	0	0	0	0	0	0	0	0	0	0	2
GCA_900045115.1	st278	98.463	0	0	0	0	0	0	0	0	0	0	0	0	0	0	0	0	0	0	0
GCA_900045125.1	st1379	98.463	100	0	0	0	0	100	0	0	0	0	0	0	0	0	0	0	0	0	2
GCA_900045515.1	st76	98.463	100	0	0	0	0	100	0	0	0	0	0	0	0	0	0	0	0	0	2
GCA_900045565.1	st112B	98.463	100	0	0	100	0	100	0	0	0	0	0	0	0	0	0	0	0	0	3
GCA_900045585.1	st140	98.463	100	0	0	0	0	100	0	0	0	0	0	0	99.375	0	100	0	99.828	0	3
GCA_900045595.1	st24	98.463	100	0	0	0	0	100	0	0	0	0	0	0	0	0	0	0	0	0	2
GCA_900045615.1	st166	98.463	99.869	0	0	0	0	100	0	0	0	0	0	0	0	0	0	0	0	0	2
GCA_900045625.1	st169	98.463	99.869	0	0	0	0	100	0	0	0	0	0	0	0	0	0	0	0	0	2
GCA_900045635.1	st175	98.463	100	0	0	0	0	100	0	0	0	0	0	0	0	0	0	0	0	0	2
GCA_900045645.1	st211	98.463	100	0	0	0	0	100	0	0	0	0	0	0	0	0	0	0	0	0	2
GCA_900045685.1	st262	98.463	100	0	0	0	0	100	0	0	0	0	0	0	0	0	0	0	0	0	2
GCA_900045695.1	st266	98.463	100	0	0	0	0	100	0	0	0	0	0	0	0	0	0	0	0	0	2
GCA_900045725.1	st305	98.463	100	0	0	100	0	100	0	0	0	0	0	0	0	0	0	0	0	0	3
GCA_900045795.1	st453	98.463	100	0	0	0	0	100	0	0	0	0	0	0	0	0	0	0	0	0	2
GCA_900045815.1	st515	98.463	100	0	0	0	0	100	0	0	0	0	0	0	0	0	0	0	0	0	2
GCA_900045975.1	st772	98.463	100	0	0	0	0	100	0	0	0	0	0	0	0	0	0	0	0	0	2
GCA_900046005.1	st1472	99.95	100	0	0	0	0	100	0	0	0	0	0	0	0	0	0	0	0	0	2
GCA_900046055.1	st372	98.463	100	0	0	0	0	100	0	0	0	0	0	0	0	0	0	0	0	0	2
GCA_900046285.1	st1991	98.463	99.869	0	0	0	0	100	0	0	0	0	0	0	0	0	0	0	0	0	2
GCA_900046295.1	st1998	98.463	99.869	0	0	0	0	100	0	0	0	0	0	0	0	0	0	0	0	0	2
GCA_900046305.1	st2053	98.463	0	0	0	0	0	0	0	0	0	0	0	0	0	0	0	0	0	0	0
GCA_900046365.1	st2130	98.463	100	0	0	0	0	100	0	0	0	0	0	0	0	0	0	0	0	0	2
GCA_900046865.1	st963	98.463	100	0	0	0	0	100	0	0	0	0	0	0	0	0	0	0	0	0	2
GCA_900047175.1	st489	99.95	100	0	0	0	0	100	0	0	0	0	0	0	0	0	0	0	0	0	2
GCA_900047265.1	st594	98.463	100	0	0	0	0	100	0	0	0	0	0	0	0	0	0	0	0	0	2
GCA_900047315.1	st678	98.463	100	0	0	0	0	100	0	0	0	0	0	0	0	0	0	0	0	0	2
GCA_900047325.1	st679	98.463	100	0	0	0	0	100	0	0	0	0	0	0	0	0	0	0	0	0	2
GCA_900047385.1	st736	98.463	100	0	0	0	0	100	0	0	0	0	0	0	0	0	0	0	0	0	2
GCA_900047435.1	st808	98.463	100	0	0	0	0	100	0	0	0	0	0	0	0	0	0	0	0	0	2
GCA_900047505.1	st308	98.463	100	0	0	100	0	100	0	0	0	0	0	0	0	0	0	0	0	0	3
GCA_900048135.1	st495	98.463	100	0	0	0	0	100	0	0	0	0	0	0	0	0	0	0	0	0	2
GCA_900048185.1	st1632	98.463	100	0	0	0	0	100	0	0	0	0	0	0	0	0	0	0	0	0	2
GCA_900048195.1	st2298	99.95	100	0	0	0	0	100	0	0	0	0	0	0	0	0	0	0	0	0	2
GCA_900048235.1	st2398	98.463	100	0	0	0	0	100	0	0	0	0	0	0	0	0	0	0	0	0	2
GCA_900048465.1	st345	98.463	100	0	0	0	0	100	0	0	0	0	0	0	0	0	0	0	0	0	2
GCA_900048505.1	st494	98.463	100	0	0	0	0	100	0	0	0	0	0	0	0	0	0	0	0	0	2
GCA_900048625.1	st873	98.463	100	0	0	0	0	100	0	0	0	0	0	0	100	0	0	0	0	0	3
GCA_900049465.1	st1011	98.463	100	0	0	0	0	100	0	0	0	0	0	0	0	0	0	0	0	0	2
GCA_900050655.1	st3136	98.463	100	0	0	0	0	100	0	0	0	0	0	0	0	0	0	0	0	0	2
GCA_900051095.1	st1096	98.463	100	0	0	0	0	100	0	0	0	0	0	0	0	0	0	0	0	0	2
GCA_900052115.1	st2027	98.463	100	0	0	0	0	100	0	0	0	0	0	0	0	0	0	0	0	0	2
GCA_900052635.1	st2797	99.95	100	0	0	0	0	100	0	0	0	0	0	0	0	0	0	0	0	0	2
GCA_900053475.1	st1777	98.463	100	0	0	0	0	100	0	0	0	0	0	0	99.792	0	100	0	99.983	0	3
GCA_900054455.1	st2682	98.463	100	0	0	0	0	100	0	0	0	0	0	0	0	0	0	0	0	0	2
GCA_900054935.1	st821	98.463	100	0	0	0	0	100	0	0	0	0	0	0	0	0	0	0	0	0	2
GCA_900056965.1	st474	98.463	100	0	0	0	0	100	0	0	0	0	0	0	0	0	0	0	0	0	2
GCA_900056975.1	st1878	98.463	100	0	0	0	0	100	0	0	0	0	0	0	0	0	0	0	0	0	2
GCA_900057795.1	st3056	98.463	100	0	0	0	0	100	0	0	0	0	0	0	0	0	0	0	0	0	2
GCA_900058635.1	st2975	98.463	100	0	0	0	0	100	0	0	0	0	0	0	99.792	0	100	0	99.983	0	3
GCA_900059805.1	st2788	98.463	100	0	0	0	0	100	0	0	0	0	0	0	0	0	0	0	0	0	2
GCA_900060225.1	st2649	98.463	100	0	0	0	0	100	0	0	0	0	0	0	0	0	0	0	0	0	2
GCA_900063345.1	st2910	98.463	100	0	0	0	0	100	0	0	0	0	0	0	99.792	0	100	0	99.983	0	3
GCA_900070225.1	1943STDY5573615	98.463	0	0	0	0	0	0	0	0	0	0	0	0	0	0	0	0	0	0	0
GCA_900070255.1	1943STDY5573614	98.463	0	0	0	0	0	0	0	0	0	0	0	0	0	0	0	0	0	0	0
GCA_900457275.1	NCTC12981	0	0	0	0	0	0	0	0	0	0	0	0	0	0	0	0	0	0	0	0
GCA_900457395.1	NCTC13299	0	0	0	0	0	0	0	0	0	0	0	0	0	0	0	0	0	0	0	0
GCA_900457555.1	NCTC13373	95.626	100	0	0	0	0	100	0	0	0	0	0	0	0	0	0	0	0	0	2
GCA_900457585.1	NCTC13300	0	0	0	0	0	0	0	0	0	0	0	0	0	0	0	0	0	0	0	0
GCA_900457695.1	NCTC6571	0	0	0	0	0	0	0	0	0	0	0	0	0	0	0	0	0	0	0	0
GCA_900457715.1	NCTC8530	0	0	0	0	0	0	0	0	0	0	0	0	0	0	0	0	0	0	0	0
GCA_900457725.1	NCTC5655	0	0	0	0	0	0	0	0	0	0	0	0	0	0	0	0	0	0	0	0
GCA_900457765.1	NCTC8507	0	0	0	0	0	0	0	0	0	0	0	0	0	0	0	0	0	0	0	0
GCA_900457785.1	NCTC7446	0	0	0	0	0	0	0	0	0	0	0	0	0	0	0	0	0	0	0	0
GCA_900457825.1	NCTC7445	0	0	0	0	0	0	0	0	0	0	0	0	0	0	0	0	0	0	0	0
GCA_900457845.1	NCTC7361	0	0	0	0	0	0	0	0	0	0	0	0	0	0	0	0	0	0	0	0
GCA_900457975.1	NCTC2669	0	0	0	0	0	0	0	0	0	0	0	0	0	0	0	0	0	0	0	0
GCA_900458055.1	NCTC5656	0	0	0	0	0	0	0	0	0	0	0	0	0	0	0	0	0	0	0	0
GCA_900458075.1	NCTC8766	95.745	0	0	0	0	0	0	0	0	0	0	0	0	0	0	0	0	0	0	0
GCA_900458105.1	NCTC11561	98.463	0	0	0	0	0	0	0	0	0	0	0	0	100	0	0	0	0	0	1
GCA_900458185.1	NCTC10035	95.863	0	0	0	0	0	0	0	0	0	0	0	0	100	0	0	0	0	0	1
GCA_900458225.1	NCTC13143	98.463	100	0	0	0	0	100	0	0	0	0	0	0	0	0	0	0	0	0	2
GCA_900458345.1	NCTC11963	95.981	0	0	0	0	0	0	0	0	0	0	0	0	0	0	0	0	0	0	0
GCA_900458475.1	NCTC11962	98.463	0	0	0	0	0	0	0	0	0	0	0	0	0	0	0	0	0	0	0
GCA_900482655.1	EOE137	98.463	100	0	0	0	0	100	0	0	0	0	0	0	0	0	0	0	0	0	2
GCA_900482685.1	EOE054	98.463	100	0	0	0	0	100	0	0	0	0	0	0	0	0	0	0	0	0	2
GCA_900482745.1	EOE035	98.463	100	0	0	0	0	100	0	0	0	0	0	0	0	0	0	0	0	0	2
GCA_900482815.1	EOE042	98.463	100	0	0	0	0	100	0	0	0	0	0	0	0	0	0	0	0	0	2
GCA_900482925.1	EOE041	98.463	100	0	0	0	0	100	0	0	0	0	0	0	0	0	0	0	0	0	2
GCA_900482985.1	EOE158	98.463	100	0	0	0	0	100	0	0	0	0	0	0	0	0	0	0	0	0	2
GCA_900483065.1	EOE154	98.463	100	0	0	0	0	100	0	0	0	0	0	0	0	0	0	0	0	0	2
GCA_900483155.1	EOE155	98.463	100	0	0	0	0	100	0	0	0	0	0	0	0	0	0	0	0	0	2
GCA_900483215.1	EOE198	98.463	100	0	0	0	0	100	0	0	0	0	0	0	0	0	0	0	0	0	2
GCA_900483485.1	EOE205	98.463	100	0	0	0	0	100	0	0	0	0	0	0	0	0	0	0	0	0	2
GCA_900483535.1	EOE220	98.463	100	0	0	0	0	100	0	0	0	0	0	0	0	0	0	0	0	0	2
GCA_900483565.1	EOE233	98.463	100	0	0	0	0	100	0	0	0	0	0	0	0	0	0	0	0	0	2
GCA_900483575.1	EOE234	98.463	100	0	0	0	0	100	0	0	0	0	0	0	0	0	0	0	0	0	2
GCA_900483625.1	EOE237	98.463	100	0	0	0	0	100	0	0	0	0	0	0	0	0	0	0	0	0	2
GCA_900483745.1	EOE268	98.463	100	0	0	0	0	100	0	0	0	0	0	0	0	0	0	0	0	0	2
GCA_900483855.1	EOE269	98.463	100	0	0	0	0	100	0	0	0	0	0	0	0	0	0	0	0	0	2
GCA_900483895.1	EOE225	98.463	100	0	0	0	0	100	0	0	0	0	0	0	0	0	0	0	0	0	2
GCA_900483975.1	EOE166	98.463	100	0	0	0	0	100	0	0	0	0	0	0	0	0	0	0	0	0	2
GCA_900484015.1	EOE165	98.345	100	0	0	0	0	100	0	0	0	0	0	0	0	0	0	0	0	0	2
GCA_900484025.1	EOE170	98.463	100	0	0	0	0	100	0	0	0	0	0	0	0	0	0	0	0	0	2
GCA_900484035.1	EOE167	98.463	100	0	0	0	0	100	0	0	0	0	0	0	0	0	0	0	0	0	2
GCA_900484065.1	EOE162	98.463	100	0	0	0	0	100	0	0	0	0	0	0	0	0	0	0	0	0	2
GCA_900484075.1	EOE169	98.463	100	0	0	0	0	100	0	0	0	0	0	0	0	0	0	0	0	0	2
GCA_900484095.1	EOE176	98.463	100	0	0	0	0	100	0	0	0	0	0	0	0	0	0	0	0	0	2
GCA_900484125.1	EOE274	98.463	100	0	0	0	0	100	0	0	0	0	0	0	0	0	0	0	0	0	2
GCA_900484165.1	EOE275	98.463	100	0	0	0	0	100	0	0	0	0	0	0	0	0	0	0	0	0	2
GCA_900484225.1	EOE171	98.463	100	0	0	0	0	100	0	0	0	0	0	0	0	0	0	0	0	0	2
GCA_900484235.1	EOE174	98.463	100	0	0	0	0	100	0	0	0	0	0	0	0	0	0	0	0	0	2
GCA_900484295.1	EOE276	98.463	100	0	0	0	0	100	0	0	0	0	0	0	0	0	0	0	0	0	2
GCA_900484305.1	EOE175	98.463	100	0	0	0	0	100	0	0	0	0	0	0	0	0	0	0	0	0	2
GCA_900484365.1	EOE161	98.463	100	0	0	0	0	100	0	0	0	0	0	0	0	0	0	0	0	0	2
GCA_900484535.1	EOE229	98.463	100	0	0	0	0	100	0	0	0	0	0	0	0	0	0	0	0	0	2
GCA_900490315.1	EOE045	98.463	100	0	0	0	0	100	0	0	0	0	0	0	0	0	0	0	0	0	2
GCA_900490425.1	EOE173	98.463	100	0	0	0	0	100	0	0	0	0	0	0	0	0	0	0	0	0	2
GCA_000788115.1	UAMS-1	98.463	0	0	0	0	0	0	0	0	0	0	0	0	0	0	0	0	0	0	0
GCA_001062485.1	1259_SAUR	98.463	100	0	0	0	0	100	0	0	0	0	0	0	0	0	0	0	0	0	2
GCA_001067185.1	756_SAUR	98.463	0	0	0	0	0	0	0	0	0	0	0	0	0	0	0	0	0	0	0
GCA_001997145.1	ATCC 25923	0	0	0	0	0	0	0	0	0	0	0	0	0	0	0	0	0	0	0	0
GCA_002092995.1	MRSARF-7	0	0	0	0	0	0	0	0	0	0	0	0	0	0	0	0	0	0	0	0
GCA_002093005.2	MRSARF-10	0	0	0	0	0	0	0	0	0	0	0	0	0	0	0	0	0	0	0	0
GCA_002121895.1	CFSA249	98.463	100	0	0	0	0	100	0	0	0	0	0	0	0	0	0	0	0	0	2
GCA_002121925.1	CFSA246	98.463	100	0	0	0	0	100	0	0	0	0	0	0	0	0	0	0	0	0	2
GCA_002121995.1	CFSA239	98.463	100	0	0	0	0	100	0	0	0	0	0	0	0	0	0	0	0	0	2
GCA_002122035.1	CFSA238	98.463	100	0	0	0	0	100	0	0	0	0	0	0	0	0	0	0	0	0	2
GCA_002122795.1	CFSA253	98.463	100	0	0	0	0	100	0	0	0	0	0	0	0	0	0	0	0	0	2
GCA_002122875.1	CFSA245	98.463	100	0	0	0	0	100	0	0	0	0	0	0	0	0	0	0	0	0	2
GCA_002122885.1	CFSA247	98.463	100	0	0	0	0	100	0	0	0	0	0	0	0	0	0	0	0	0	2
GCA_002122915.1	CFSA235	98.463	100	0	0	0	0	100	0	0	0	0	0	0	0	0	0	0	0	0	2
GCA_002122935.1	CFSA231	98.345	0	0	0	0	0	0	0	0	0	0	0	0	0	0	0	0	0	0	0
GCA_002123795.1	CFSA141	98.463	100	0	0	0	0	100	0	0	0	0	0	0	0	0	0	0	0	0	2
GCA_002123865.1	CFSA136	98.463	0	0	0	0	0	0	0	0	0	0	0	0	0	0	0	0	0	0	0
GCA_002124595.1	CFSA198	98.463	100	0	0	0	0	100	0	0	0	0	0	0	0	0	0	0	0	0	2
GCA_002124815.1	CFSA158	98.463	100	0	0	0	0	100	0	0	0	0	0	0	0	0	0	0	0	0	2
GCA_002124935.1	CFSA138	98.463	100	0	0	0	0	100	0	0	0	0	0	0	0	0	0	0	0	0	2
GCA_002125025.1	CFSA110	98.463	100	0	0	0	0	100	0	0	0	0	0	0	0	0	0	0	0	0	2
GCA_002126125.1	c54	98.463	0	0	0	0	0	0	0	0	0	0	0	0	0	0	0	0	0	0	0
GCA_002126195.1	c49	98.463	0	0	0	0	0	0	0	0	0	0	0	0	0	0	0	0	0	0	0
GCA_002126255.1	c43	98.463	100	0	0	0	0	100	0	0	0	0	0	0	0	0	0	0	0	0	2
GCA_002126275.1	abscess130	98.463	0	0	0	0	0	0	0	0	0	0	0	0	0	0	0	0	0	0	0
GCA_002156445.1	I3	98.463	0	0	0	0	0	0	0	0	0	0	0	0	0	0	0	0	0	0	0
GCA_003417345.1	M1C035	98.463	100	0	0	0	0	99.863	0	0	0	0	0	0	0	0	0	0	0	0	2
GCA_003419545.1	M1K096	98.463	100	0	0	0	0	100	0	0	0	0	0	0	0	0	0	0	0	0	2
GCA_003422305.1	M6K123	99.768	100	0	0	0	0	100	0	0	0	0	0	0	0	0	0	0	0	0	2
GCA_003423645.1	M6K233	0	0	0	0	0	0	0	0	0	0	0	0	0	0	0	0	0	0	0	0
GCA_003813305.1	G0615	98.345	0	0	0	0	0	0	0	0	0	0	0	0	0	0	0	0	0	0	0
GCA_003813325.1	G0142	95.745	100	0	0	0	0	100	0	0	0	0	0	0	0	0	0	0	0	0	2
GCA_003813405.1	G0614	98.463	0	0	0	0	0	0	0	0	0	0	0	0	0	0	0	0	0	0	0
GCA_003813445.1	G1236	98.463	0	0	0	0	0	0	0	0	0	0	0	0	0	0	0	0	0	0	0
GCA_003813635.1	G0050	98.463	0	0	0	0	0	0	0	0	0	0	0	0	0	0	0	0	0	0	0
GCA_003813665.1	G0055	98.463	0	0	0	0	0	0	0	0	0	0	0	0	0	0	0	0	0	0	0
GCA_003813685.1	G0056	98.463	0	0	0	0	0	0	0	0	0	0	0	0	0	0	0	0	0	0	0
GCA_003813705.1	G0063	98.463	0	0	0	0	0	0	0	0	0	0	0	0	0	0	0	0	0	0	0
GCA_003813725.1	G0049	98.463	0	0	0	0	0	0	0	0	0	0	0	0	0	0	0	0	0	0	0
GCA_003857315.1	C0772	98.463	100	0	0	0	0	100	0	0	0	0	0	0	0	0	0	0	0	0	2
GCA_900022585.1	st648	98.463	100	0	0	0	0	100	0	0	0	0	0	0	0	0	0	0	0	0	2
GCA_900037705.1	st512	98.463	100	0	0	0	0	100	0	0	0	0	0	0	0	0	0	0	0	0	2
GCA_900038415.1	st773	97.872	100	0	0	0	0	100	0	0	0	0	0	0	0	0	0	0	0	0	2
GCA_900039015.1	st1310	98.463	100	0	0	100	0	100	0	0	0	0	0	0	0	0	0	0	0	0	3
GCA_900047225.1	st556	98.463	100	0	0	100	0	100	0	0	0	0	0	0	0	0	0	0	0	0	3
GCA_900064545.1	st975	99.95	100	0	0	0	0	100	0	0	0	0	0	0	0	0	0	0	0	0	2
GCA_900070215.1	1943STDY5698363	95.981	0	0	0	0	0	0	0	0	0	0	0	0	0	0	0	0	0	0	0
GCA_900097505.1	043H	99.409	0	0	0	0	0	99.048	0	0	0	0	0	0	0	100	0	0	0	0	2
GCA_900097825.1	type strain: MRSA941440/047440	99.409	0	0	0	0	0	0	0	0	0	0	0	0	0	100	0	0	0	0	1
GCA_900097925.1	MSSAT026	99.409	0	0	0	0	0	0	0	0	0	0	0	0	0	100	0	0	0	0	1
GCA_900250235.1	H1312	98.463	0	0	0	0	0	0	0	0	0	0	0	0	0	0	0	0	0	0	0
GCA_900250245.1	H1315	98.463	0	0	0	0	0	0	0	0	0	0	0	0	0	0	0	0	0	0	0
GCA_900250345.1	H1410	98.463	0	0	0	0	0	0	0	0	0	0	0	0	0	0	0	0	0	0	0
GCA_900250385.1	H1402	98.345	0	0	0	0	0	0	0	0	0	0	0	0	0	0	0	0	0	0	0
GCA_900250505.1	H1530	98.463	0	0	0	0	0	0	0	0	0	0	0	0	0	0	0	0	0	0	0
GCA_900250575.1	H1539	98.463	0	0	0	0	0	0	0	0	0	0	0	0	0	0	0	0	0	0	0
GCA_900250685.1	H1715	98.463	0	0	0	0	0	0	0	0	0	0	0	0	0	100	0	0	0	0	1
GCA_900250865.1	M2858	98.463	0	0	0	0	0	0	0	0	0	0	0	0	0	0	0	0	0	0	0
GCA_900250895.1	M2856	98.463	0	0	0	0	0	0	0	0	0	0	0	0	0	0	0	0	0	0	0
GCA_900250915.1	M2891	98.463	0	0	0	0	0	0	0	0	0	0	0	0	0	0	0	0	0	0	0
GCA_900250975.1	M2893	98.463	0	0	0	0	0	0	0	0	0	0	0	0	0	0	0	0	0	0	0
GCA_900251145.1	M3112	98.463	0	0	0	0	0	0	0	0	0	0	0	0	0	0	0	0	0	0	0
GCA_900251205.1	M3172	98.345	0	0	0	0	0	0	0	0	0	0	0	0	0	0	0	0	0	0	0
GCA_900251215.1	M3245	98.463	0	0	0	0	0	0	0	0	0	0	0	0	0	0	0	0	0	0	0
GCA_900251255.1	M3177	99.409	0	0	0	0	0	0	0	0	0	0	0	0	0	100	0	0	0	0	1
GCA_900251285.1	M3326	98.463	0	0	0	0	0	0	0	0	0	0	0	0	0	0	0	0	0	0	0
GCA_900251405.1	M3457	98.463	0	0	0	0	0	0	0	0	0	0	0	0	0	0	0	0	0	0	0
GCA_900251495.1	M3540	98.463	0	0	0	0	0	0	0	0	0	0	0	0	0	0	0	0	0	0	0
GCA_900251575.1	M3704	98.463	0	0	0	0	0	0	0	0	0	0	0	0	0	0	0	0	0	0	0
GCA_900251745.1	M3845	98.463	0	0	0	0	0	0	0	0	0	0	0	0	0	0	0	0	0	0	0
GCA_900251785.1	M3753	99.409	99.874	0	0	0	0	98.978	0	0	0	0	0	0	0	100	0	0	0	0	3
GCA_900251825.1	M3905	99.409	0	0	0	0	0	93.21	0	0	0	0	0	0	0	0	0	0	0	0	1
GCA_900251845.1	M3909	98.463	0	0	0	0	0	0	0	0	0	0	0	0	0	0	0	0	0	0	0
GCA_900251975.1	M3930	98.463	0	0	0	0	0	0	0	0	0	0	0	0	0	0	0	0	0	0	0
GCA_900482665.1	EOE140	98.463	100	0	0	0	0	100	0	0	0	0	0	0	0	0	0	0	0	0	2
GCA_900484045.1	EOE163	98.463	100	0	0	0	0	100	0	0	0	0	0	0	0	0	0	0	0	0	2
GCA_004210035.1	SA10	99.851	99.869	0	0	0	0	100	0	0	0	0	0	0	0	0	0	0	0	0	2
GCA_900457655.1	NCTC7878	0	0	0	0	0	0	0	0	0	0	0	0	0	0	0	0	0	0	0	0
GCA_900458205.1	NCTC11150	0	0	0	0	0	0	0	0	0	0	0	0	0	0	0	0	0	0	0	0

## Sheet: CC59
Assembly	Strain	beta-lactam	aminoglycoside	colistin	fosfomycin	fusidicacid	glycopeptide	macrolide	nitroimidazole	oxazolidinone	phenicol	quinolone	rifampicin	sulphonamide	tetracycline	trimethoprim	ardA-H2	ardA-H1	Tn916	Tn5801	Resistance without bl
GCA_000470865.1	SA40	99.9	0	0	0	0	0	0	0	0	0	0	0	0	0	0	0	0	0	0	0
GCA_000737615.1	SA268	99.95	99.78	0	0	0	0	99.729	0	0	0	0	0	0	0	0	0	0	0	0	2
GCA_000828035.1	DAR4145	98.227	99.874	0	0	0	0	98.978	0	0	0	0	0	0	0	100	0	0	0	0	3
GCA_001456215.1	MS4	99.9	0	0	0	0	0	0	0	0	0	0	0	0	0	0	0	0	0	0	0
GCA_001880265.1	SA40TW	99.9	0	0	0	0	0	0	0	0	0	0	0	0	0	0	0	0	0	0	0
GCA_002442975.1	HZW450	99.9	99.78	0	0	0	0	99.729	0	0	93.827	0	0	0	0	0	0	0	0	0	3
GCA_002633845.1	CFSAN007883	0	0	0	0	0	0	0	0	0	0	0	0	0	0	0	0	0	0	0	0
GCA_003288395.1	AR_475	99.882	99.874	0	0	0	0	98.909	0	0	0	0	0	0	0	0	0	0	0	0	2
GCA_004772055.1	O331	0	0	0	0	0	0	0	0	0	0	0	0	0	0	0	0	0	0	0	0
GCA_005705815.1	Lr6	98.227	99.874	0	0	0	0	98.978	0	0	0	0	0	0	0	100	0	0	0	0	3
GCA_005707015.1	R50	98.227	99.874	0	0	0	0	98.978	0	0	0	0	0	0	0	100	0	0	0	0	3
GCA_005707335.1	Lr3	98.227	99.874	0	0	0	0	98.978	0	0	0	0	0	0	0	100	0	0	0	0	3
GCA_006158985.1	S15	97.872	99.78	0	0	0	0	99.593	0	0	0	0	0	0	100	0	0	0	0	0	3
GCA_000541215.1	OCMM6067	99.409	99.874	0	0	0	0	98.978	0	0	0	0	0	0	100	0	0	0	0	0	3
GCA_000541235.1	OCMM6066	99.409	99.874	0	0	0	0	98.978	0	0	0	0	0	0	100	0	0	0	0	0	3
GCA_000542055.1	OCMM6095	99.409	99.874	0	0	0	0	98.978	0	0	0	0	0	0	100	0	0	0	0	0	3
GCA_000561585.1	F70893	99.95	0	0	0	0	0	0	0	0	0	0	0	0	0	0	0	0	0	0	0
GCA_000561745.1	F77047	99.95	0	0	0	0	0	0	0	0	0	0	0	0	0	0	0	0	0	0	0
GCA_000562835.1	H48052	99.95	0	0	0	0	0	0	0	0	0	0	0	0	0	0	0	0	0	0	0
GCA_000562855.1	H48054	99.95	0	0	0	0	0	0	0	0	0	0	0	0	0	0	0	0	0	0	0
GCA_000564485.1	W21932	99.95	0	0	0	0	0	0	0	0	0	0	0	0	0	0	0	0	0	0	0
GCA_000571655.1	F77917	99.882	99.874	0	0	0	0	98.978	0	0	0	0	0	0	0	0	0	0	0	0	2
GCA_000579075.1	H81433	99.882	99.874	0	0	0	0	98.978	0	0	0	0	0	0	0	0	0	0	0	0	2
GCA_000579995.1	W73738	95.981	0	0	0	0	0	0	0	0	0	0	0	0	0	0	0	0	0	0	0
GCA_000586835.1	W25797	99.409	0	0	0	0	0	98.978	0	0	0	0	0	0	0	0	0	0	0	0	1
GCA_000605265.1	M17033	95.981	0	0	0	0	0	0	0	0	0	0	0	0	0	0	0	0	0	0	0
GCA_000606645.1	M64056	95.981	0	0	0	0	0	0	0	0	0	0	0	0	0	0	0	0	0	0	0
GCA_000606845.1	T63897	95.981	0	0	0	0	0	0	0	0	0	0	0	0	0	0	0	0	0	0	0
GCA_000606865.1	T63898	95.981	0	0	0	0	0	0	0	0	0	0	0	0	0	0	0	0	0	0	0
GCA_000645955.1	VET1518S	0	0	0	0	0	0	0	0	0	0	0	0	0	0	0	0	0	0	0	0
GCA_001412275.1	M1	97.872	99.78	0	0	0	0	99.729	0	0	0	0	0	0	100	0	0	0	0	0	3
GCA_000259715.1	118	97.636	99.874	0	0	0	0	98.978	0	0	0	0	0	0	0	100	0	0	0	0	3
GCA_000260035.1	IS-160	99.882	99.874	0	0	0	0	98.909	0	0	0	0	0	0	0	0	0	0	0	0	2
GCA_000308895.1	PM1	97.872	99.78	0	0	0	0	99.729	0	0	93.827	0	0	0	100	0	0	0	0	0	4
GCA_000336275.1	333	95.745	100	0	0	0	0	0	0	0	0	0	0	0	0	100	0	0	0	0	2
GCA_000336295.1	VH60	98.345	99.874	0	0	0	0	98.978	0	0	0	0	0	0	0	100	0	0	0	0	3
GCA_000336315.1	3989	98.227	99.874	0	0	0	0	98.978	0	0	0	0	0	0	0	100	0	0	0	0	3
GCA_000336335.1	120	95.626	99.874	0	0	0	0	98.978	0	0	0	0	0	0	0	100	0	0	0	0	3
GCA_000336595.1	KT/Y21	95.745	99.874	0	0	0	0	98.978	0	0	0	0	0	0	0	100	0	0	0	0	3
GCA_000364505.1	3957	95.745	100	0	0	0	0	0	0	0	0	0	0	0	0	100	0	0	0	0	2
GCA_000364525.1	LVP2	98.345	99.874	0	0	0	0	98.978	0	0	0	0	0	0	0	100	0	0	0	0	3
GCA_000463035.1	CO-08	98.227	99.874	0	0	0	0	98.978	0	0	0	0	0	0	0	100	0	0	0	0	3
GCA_000516935.1	ST772-MRSA-V	96.69	99.874	0	0	0	0	98.978	0	0	0	0	0	0	0	100	0	0	0	0	3
GCA_000601585.1	F19490	99.95	99.866	0	0	0	0	0	0	0	0	0	0	0	0	0	0	0	0	0	1
GCA_000603225.1	W25799	99.95	0	0	0	0	0	0	0	0	0	0	0	0	0	0	0	0	0	0	0
GCA_000697865.1	21321	99.882	0	0	0	0	0	99.048	0	0	0	0	0	0	0	0	0	0	0	0	1
GCA_001045595.1	#42S	99.9	99.874	0	0	0	0	99.048	0	0	0	0	0	0	0	100	0	0	0	0	3
GCA_001067735.1	975_SAUR	99.95	0	0	0	0	0	0	0	0	0	0	0	0	0	0	0	0	0	0	0
GCA_001611485.1	MS4-T10	97.872	0	0	0	0	0	0	0	0	0	0	0	0	99.783	0	0	0	0	0	1
GCA_001611535.1	MS4-T60	97.872	0	0	0	0	0	0	0	0	0	0	0	0	99.783	0	0	0	0	0	1
GCA_001652745.1	VB26276	98.227	99.874	0	0	0	0	98.909	0	0	0	0	0	0	0	100	0	0	0	0	3
GCA_001756645.1	VB23686	98.227	99.874	0	0	0	0	98.978	0	0	0	0	0	0	0	100	0	0	0	0	3
GCA_001854955.1	VB16578	98.227	99.874	0	0	0	0	98.978	0	0	0	0	0	0	0	100	0	0	0	0	3
GCA_001854985.1	VB9939	95.745	99.874	0	0	0	0	98.978	0	0	0	0	0	0	0	100	0	0	0	0	3
GCA_001855145.1	VB46389	95.632	99.874	0	0	0	0	98.978	0	0	0	0	0	0	0	100	0	0	0	0	3
GCA_002097515.1	773	99.409	0	0	0	0	0	98.978	0	0	0	0	0	0	0	0	0	0	0	0	1
GCA_002105325.1	MS4_LZD100	97.872	0	0	0	0	0	0	0	0	0	0	0	0	100	0	0	0	0	0	1
GCA_002896465.1	MS4L120	97.872	0	0	0	0	0	0	0	0	0	0	0	0	100	0	0	0	0	0	1
GCA_002982495.1	Case7_N1c	0	0	0	0	0	0	0	0	0	0	0	0	0	0	0	0	0	0	0	0
GCA_002982535.1	Case7_N1b	0	0	0	0	0	0	0	0	0	0	0	0	0	0	0	0	0	0	0	0
GCA_002982555.1	Case7_N1a	0	0	0	0	0	0	0	0	0	0	0	0	0	0	0	0	0	0	0	0
GCA_002982875.1	Case4_N56c	0	0	0	0	0	0	0	0	0	0	0	0	0	0	0	0	0	0	0	0
GCA_002982895.1	Case4_N56b	0	0	0	0	0	0	0	0	0	0	0	0	0	0	0	0	0	0	0	0
GCA_003237615.1	CM100	98.109	99.874	0	0	0	0	99.046	0	0	0	0	0	0	0	100	0	0	0	0	3
GCA_003237625.1	CM99	98.227	99.874	0	0	0	0	98.978	0	0	0	0	0	0	0	100	0	0	0	0	3
GCA_003238555.1	CM57	99.882	0	0	0	0	0	0	0	0	0	0	0	0	0	0	0	0	0	0	0
GCA_003239415.1	CM98	98.227	99.874	0	0	0	0	98.978	0	0	0	0	0	0	0	100	0	0	0	0	3
GCA_003239495.1	CM87	97.872	99.78	0	0	0	0	99.729	0	0	0	0	0	0	0	0	0	0	0	0	2
GCA_003239505.1	CM84	99.9	99.78	0	0	0	0	99.729	0	0	93.827	0	0	0	0	0	0	0	0	0	3
GCA_003240245.1	CM28	99.882	0	0	0	0	0	0	0	0	0	0	0	0	0	0	0	0	0	0	0
GCA_003310385.1	AL008	99.95	99.67	0	0	0	0	99.729	0	0	0	0	0	0	0	0	0	0	0	0	2
GCA_003310455.1	AC045	97.872	99.78	0	0	0	0	99.593	0	0	0	0	0	0	0	0	0	0	0	0	2
GCA_003345455.1	QY01	97.872	99.78	0	0	0	0	99.729	0	0	93.827	0	0	0	100	0	0	0	0	0	4
GCA_003345515.1	QY02	97.872	99.78	0	0	0	0	99.729	0	0	0	0	0	0	100	0	0	0	0	0	3
GCA_003710305.1	VB30101	95.632	99.874	0	0	0	0	98.978	0	0	0	0	0	0	0	100	0	0	0	0	3
GCA_003710315.1	VB32131	98.227	99.874	0	0	0	0	98.909	0	0	0	0	0	0	0	100	0	0	0	0	3
GCA_003710345.1	VB31794	98.111	99.874	0	0	0	0	98.91	0	0	0	0	0	0	0	100	0	0	0	0	3
GCA_003710355.1	VB2304	98.227	99.874	0	0	0	0	98.909	0	0	0	0	0	0	0	100	0	0	0	0	3
GCA_003710395.1	VB1425	98.227	99.874	0	0	0	0	98.978	0	0	0	0	0	0	0	100	0	0	0	0	3
GCA_003710425.1	VB28228	98.227	99.874	0	0	0	0	98.909	0	0	0	0	0	0	0	100	0	0	0	0	3
GCA_003710445.1	VB28729	98.227	99.874	0	0	0	0	98.978	0	0	0	0	0	0	0	100	0	0	0	0	3
GCA_003710455.1	VB14806	98.111	99.874	0	0	0	0	98.913	0	0	0	0	0	0	0	100	0	0	0	0	3
GCA_003710475.1	VB7336	95.745	99.874	0	0	0	0	98.909	0	0	98.92	0	0	0	0	100	0	0	0	0	4
GCA_003710505.1	VB20921	98.227	99.874	0	0	0	0	98.978	0	0	0	0	0	0	0	100	0	0	0	0	3
GCA_003710515.1	VB14915	98.111	99.874	0	0	0	0	98.91	0	0	0	0	0	0	0	100	0	0	0	0	3
GCA_003710545.1	VB16446	98.227	99.874	0	0	0	0	98.978	0	0	0	0	0	0	0	99.799	0	0	0	0	3
GCA_003710565.1	VB10363	98.111	99.874	0	0	0	0	98.978	0	0	0	0	0	0	0	100	0	0	0	0	3
GCA_003710575.1	VB24282	98.227	99.874	0	0	0	0	98.978	0	0	0	0	0	0	0	99.799	0	0	0	0	3
GCA_003710585.1	VB7752	98.227	99.874	0	0	0	0	98.909	0	0	0	0	0	0	0	100	0	0	0	0	3
GCA_003710625.1	VB14468	98.227	99.874	0	0	0	0	98.909	0	0	0	0	0	0	0	100	0	0	0	0	3
GCA_003710635.1	VB14080	98.111	99.874	0	0	0	0	98.978	0	0	0	0	0	0	0	100	0	0	0	0	3
GCA_003710645.1	VB1281	98.227	99.874	0	0	0	0	98.978	0	0	0	0	0	0	0	99.799	0	0	0	0	3
GCA_003710685.1	VB8852	98.227	99.874	0	0	0	0	98.978	0	0	0	0	0	0	0	100	0	0	0	0	3
GCA_003710705.1	VB9621	98.227	99.874	0	0	0	0	98.978	0	0	0	0	0	0	0	100	0	0	0	0	3
GCA_003710725.1	VB12492	98.227	99.874	0	0	0	0	98.909	0	0	0	0	0	0	0	100	0	0	0	0	3
GCA_003710745.1	VB13872	98.227	99.874	0	0	0	0	98.978	0	0	0	0	0	0	0	100	0	0	0	0	3
GCA_003710755.1	VB8215	98.227	99.874	0	0	0	0	98.909	0	0	0	0	0	0	0	100	0	0	0	0	3
GCA_003710765.1	VB103	98.227	99.874	0	0	0	0	98.978	0	0	0	0	0	0	0	100	0	0	0	0	3
GCA_003971155.1	VB679	98.227	99.874	0	0	0	0	98.909	0	0	0	0	0	0	0	100	0	0	0	0	3
GCA_004122805.1	SAZ_16	98.227	99.874	0	0	0	0	98.978	0	0	0	0	0	0	0	100	0	0	0	0	3
GCA_006511635.1	M3386D	0	0	0	0	0	0	0	0	0	0	0	0	0	0	0	0	0	0	0	0
GCA_900045765.1	st376	99.882	0	0	0	0	0	98.5	0	0	0	0	0	0	0	0	0	0	0	0	1
GCA_900057345.1	st3047	97.872	99.78	0	0	0	0	99.729	0	0	93.827	0	0	0	100	0	0	0	0	0	4
GCA_001063895.1	173_SAUR	0	0	0	0	0	0	0	0	0	0	0	0	0	0	0	0	0	0	0	0
GCA_001065195.1	484_SAUR	99.882	99.874	0	0	0	0	98.978	0	0	0	0	0	0	0	0	0	0	0	0	2
GCA_002121165.1	CFSA322	95.981	0	0	0	0	0	99.184	0	0	0	0	0	0	0	0	0	0	0	0	1
GCA_002122115.1	CFSA232	0	100	0	0	0	0	99.456	0	0	0	0	0	0	98.438	0	0	0	0	0	3
GCA_002123315.1	CFSA199	0	0	0	0	0	0	0	0	0	0	0	0	0	0	0	0	0	0	0	0
GCA_002124265.1	CFSA089	99.882	99.874	0	0	0	0	98.978	0	0	0	0	0	0	0	0	0	0	0	0	2
GCA_002124535.1	CFSA204	99.882	99.874	0	0	0	0	98.978	0	0	0	0	0	0	0	0	0	0	0	0	2
GCA_002124835.1	CFSA156	95.981	0	0	0	0	0	99.184	0	0	0	0	0	0	0	0	0	0	0	0	1
GCA_003309045.1	YK046	97.872	99.78	0	0	0	0	99.729	0	0	0	0	0	0	100	0	0	0	0	0	3
GCA_003309605.1	S1AH044	97.872	0	0	0	0	0	0	0	0	98.92	0	0	0	0	0	0	0	0	0	1
GCA_003309715.1	S1AA062	97.872	0	0	0	0	0	0	0	0	0	0	0	0	100	0	0	0	0	0	1
GCA_003310335.1	AR3	97.872	99.78	0	0	0	0	99.729	0	0	0	0	0	0	0	0	0	0	0	0	2
GCA_003310345.1	AR2-1	97.872	99.78	0	0	0	0	99.729	0	0	0	0	0	0	0	0	0	0	0	0	2
GCA_003310395.1	AK046	97.872	99.78	0	0	0	0	99.729	0	0	0	0	0	0	100	0	0	0	0	0	3
GCA_003310415.1	AD057	97.872	99.78	0	0	0	0	99.729	0	0	0	0	0	0	99.928	0	0	0	0	0	3
GCA_003310445.1	AD010	97.872	99.78	0	0	0	0	99.729	0	0	0	0	0	0	99.928	0	0	0	0	0	3
GCA_003310775.1	AR1	97.872	99.78	0	0	0	0	99.729	0	0	0	0	0	0	0	0	0	0	0	0	2
GCA_003310825.1	AK017	97.872	99.78	0	0	0	0	99.729	0	0	0	0	0	0	100	0	0	0	0	0	3
GCA_003310935.1	AD016	97.872	99.78	0	0	0	0	99.729	0	0	0	0	0	0	99.928	0	0	0	0	0	3
GCA_003420825.1	M6C039	99.882	0	0	0	0	0	0	0	0	0	0	0	0	0	0	0	0	0	0	0
GCA_003423625.1	M6K232	0	99.78	0	0	0	0	99.729	0	0	0	0	0	0	0	0	0	0	0	0	2
GCA_003992475.1	MS4o8	97.872	0	0	0	0	0	0	0	0	0	0	0	0	0	0	0	0	0	0	0
GCA_004136935.1	P13	97.872	99.78	0	0	0	0	99.729	0	0	93.827	0	0	0	100	0	0	0	0	0	4
GCA_004137005.1	P8	97.872	99.78	0	0	0	0	99.729	0	0	93.827	0	0	0	100	0	0	0	0	0	4
GCA_004137015.1	P2	97.872	99.78	0	0	0	0	99.729	0	0	93.827	0	0	0	100	0	0	0	0	0	4
GCA_004137025.1	P5	97.872	99.78	0	0	0	0	99.729	0	0	93.827	0	0	0	100	0	0	0	0	0	4
GCA_004137035.1	P9	97.872	99.78	0	0	0	0	99.729	0	0	93.827	0	0	0	100	0	0	0	0	0	4
GCA_004137105.1	P7	97.872	99.78	0	0	0	0	99.729	0	0	93.827	0	0	0	100	0	0	0	0	0	4
GCA_004137725.1	P3	97.872	99.78	0	0	0	0	99.729	0	0	93.827	0	0	0	100	0	0	0	0	0	4
GCA_004168635.1	P14	97.872	99.78	0	0	0	0	99.729	0	0	93.827	0	0	0	100	0	0	0	0	0	4
GCA_004168705.1	P10	97.872	99.78	0	0	0	0	99.729	0	0	0	0	0	0	100	0	0	0	0	0	3
GCA_004168715.1	P4	97.872	99.78	0	0	0	0	99.729	0	0	93.827	0	0	0	100	0	0	0	0	0	4
GCA_004168725.1	P11	97.872	99.78	0	0	0	0	99.729	0	0	93.827	0	0	0	100	0	0	0	0	0	4
GCA_004168735.1	C	97.872	99.78	0	0	0	0	99.729	0	0	0	0	0	0	100	0	0	0	0	0	3
GCA_004168755.1	S1	97.872	99.78	0	0	0	0	99.729	0	0	93.827	0	0	0	100	0	0	0	0	0	4
GCA_004168805.1	W	97.872	99.78	0	0	0	0	99.729	0	0	93.827	0	0	0	100	0	0	0	0	0	4
GCA_004168815.1	P15	97.872	99.78	0	0	0	0	99.729	0	0	93.827	0	0	0	100	0	0	0	0	0	4
GCA_004168825.1	HCW	97.872	99.78	0	0	0	0	99.729	0	0	93.827	0	0	0	100	0	0	0	0	0	4
GCA_004168835.1	P12	99.9	99.78	0	0	0	0	99.729	0	0	93.827	0	0	0	0	0	0	0	0	0	3
GCA_004168845.1	S2	97.872	99.78	0	0	0	0	99.729	0	0	93.827	0	0	0	100	0	0	0	0	0	4
GCA_004168905.1	P6	97.872	99.78	0	0	0	0	99.729	0	0	93.827	0	0	0	100	0	0	0	0	0	4
GCA_004168915.1	P1	97.872	99.78	0	0	0	0	99.729	0	0	93.827	0	0	0	100	0	0	0	0	0	4
GCA_005861015.1	YNSA279	97.872	99.78	0	0	0	0	99.729	0	0	93.827	0	0	0	100	0	0	0	0	0	4
GCA_005861085.1	YNSA210	97.872	99.78	0	0	0	0	99.729	0	0	0	0	0	0	100	0	0	0	0	0	3
GCA_005861095.1	YNSA252	97.872	99.78	0	0	0	0	99.729	0	0	93.827	0	0	0	100	0	0	0	0	0	4
GCA_005861105.1	YNSA167	97.872	99.78	0	0	0	0	99.729	0	0	0	0	0	0	100	0	0	0	0	0	3
GCA_005861195.1	YNSA144	97.872	0	0	0	0	0	0	0	0	93.827	0	0	0	100	0	0	0	0	0	2
GCA_005861205.1	YNSA160	97.872	99.78	0	0	0	0	99.729	0	0	0	0	0	0	100	0	0	0	0	0	3
GCA_005861275.1	YNSA132	99.9	99.78	0	0	0	0	99.729	0	0	93.827	0	0	0	0	0	0	0	0	0	3
GCA_005861285.1	YNSA115	97.872	99.78	0	0	0	0	99.729	0	0	93.827	0	0	0	100	0	0	0	0	0	4
GCA_005861295.1	YNSA119	97.872	99.78	0	0	0	0	99.729	0	0	93.827	0	0	0	100	0	0	0	0	0	4
GCA_005861375.1	YNSA103	97.872	99.78	0	0	0	0	99.729	0	0	0	0	0	0	100	0	0	0	0	0	3
GCA_005861525.1	YNSA38	97.872	99.78	0	0	0	0	99.729	0	0	0	0	0	0	100	0	0	0	0	0	3
GCA_005861575.1	YNSA11	97.872	99.78	0	0	0	0	99.729	0	0	93.827	0	0	0	100	0	0	0	0	0	4
GCA_005861825.1	YNSA154	97.872	99.78	0	0	0	0	99.729	0	0	0	0	0	0	0	0	0	0	0	0	2
GCA_005861935.1	YNSA53	97.872	99.78	0	0	0	0	99.729	0	0	0	0	0	0	100	0	0	0	0	0	3
GCA_005861995.1	YNSA49	97.872	99.78	0	0	0	0	99.729	0	0	0	0	0	0	100	0	0	0	0	0	3
GCA_005862085.1	YNSA7	97.872	99.78	0	0	0	0	99.729	0	0	0	0	0	0	100	0	0	0	0	0	3
GCA_900250555.1	H1577	99.9	99.78	0	0	0	0	99.729	0	0	0	0	0	0	0	0	0	0	0	0	2
GCA_900250615.1	H1766	97.872	0	0	0	0	0	99.048	0	0	0	0	0	0	0	0	0	0	0	0	1
GCA_900250805.1	H1843	97.872	99.78	0	0	0	0	99.729	0	0	93.827	0	0	0	100	0	0	0	0	0	4
GCA_900250875.1	HL456	97.872	99.757	0	0	0	0	99.729	0	0	93.827	0	0	0	100	0	0	0	0	0	4
GCA_900251195.1	M3165	95.745	0	0	0	99.844	0	0	0	0	0	0	0	0	100	0	0	0	0	0	2
GCA_900251545.1	M3541	98.227	99.874	0	0	0	0	98.978	0	0	0	0	0	0	0	100	0	0	0	0	3
GCA_900251615.1	M3593	97.872	99.78	0	0	0	0	99.729	0	0	93.827	0	0	0	100	0	0	0	0	0	4
GCA_900251625.1	M3688	97.872	0	0	0	0	0	0	0	0	0	0	0	0	0	0	0	0	0	0	0
GCA_900251695.1	M3685	98.227	99.874	0	0	0	0	98.978	0	0	0	0	0	0	0	100	0	0	0	0	3
GCA_900252005.1	M3993	98.109	99.874	0	0	0	0	99.048	0	0	0	0	0	0	100	100	0	0	0	0	4
GCA_900252115.1	RH178	97.754	99.874	0	0	0	0	98.978	0	0	0	0	0	0	0	100	0	0	0	0	3
GCA_004153345.1	VB9352	98.227	99.874	0	0	0	0	98.978	0	0	0	0	0	0	0	100	0	0	0	0	3
GCA_000934245.1	144_S7	95.745	99.874	0	0	0	0	0	0	0	0	0	0	0	0	100	0	0	0	0	2
GCA_000934265.1	79_S10	96.809	99.874	0	0	0	0	0	0	0	0	0	0	0	0	0	0	0	0	0	1
GCA_001278865.1	MRSA SKN07	97.412	99.307	0	0	0	0	0	0	0	0	0	0	0	0	0	0	0	0	0	1
GCA_001691495.1	VBV9352	98.227	99.874	0	0	0	0	98.909	0	0	0	0	0	0	0	100	0	0	0	0	3
GCA_003710365.1	VB4126	98.111	99.874	0	0	0	0	98.978	0	0	0	0	0	0	0	100	0	0	0	0	3

## Sheet: CC80
Assembly	Strain	beta-lactam	aminoglycoside	colistin	fosfomycin	fusidicacid	glycopeptide	macrolide	nitroimidazole	oxazolidinone	phenicol	quinolone	rifampicin	sulphonamide	tetracycline	trimethoprim	ardA-H2	ardA-H1	Tn916	Tn5801	Resistance without bl
GCA_000239235.1	11819-97	98.582	99.874	0	0	100	0	98.978	0	0	0	0	0	0	0	0	0	0	0	0	3
GCA_001296985.1	GR2	98.227	99.78	0	0	100	0	99.048	0	0	0	0	0	0	100	0	0	0	0	0	4
GCA_001457495.1	NCTC13435	99.851	99.78	0	0	0	0	0	0	0	0	0	0	0	0	0	0	0	0	0	1
GCA_001611365.1	ST20130942	98.463	0	0	0	0	0	0	0	0	0	0	0	0	0	0	0	0	0	0	0
GCA_001611385.1	ST20130943	98.463	0	0	0	0	0	0	0	0	0	0	0	0	0	0	0	0	0	0	0
GCA_002140115.1	FORC_039	99.409	99.932	0	0	0	0	99.864	0	0	0	0	0	0	0	0	0	0	0	0	2
GCA_003010875.1	FORC59	99.409	100	0	0	0	0	99.864	0	0	0	0	0	0	0	0	0	0	0	0	2
GCA_003573855.1	JMUB1273	0	0	0	0	0	0	0	0	0	0	0	0	0	0	0	0	0	0	0	0
GCA_900635095.1	NCTC8317	0	0	0	0	0	0	0	0	0	0	0	0	0	0	0	0	0	0	0	0
GCA_000360525.1	M0239	99.409	0	0	0	0	0	0	0	0	0	0	0	0	0	0	0	0	0	0	0
GCA_000645335.1	VET0632S	98.463	0	0	0	0	0	0	0	0	0	0	0	0	0	0	0	0	0	0	0
GCA_000645395.1	VET0678S	98.463	0	0	0	0	0	0	0	0	0	0	0	0	0	0	0	0	0	0	0
GCA_000645415.1	VET0679S	98.463	0	0	0	0	0	0	0	0	0	0	0	0	0	0	0	0	0	0	0
GCA_000645575.1	VET1020S	98.463	0	0	0	0	0	0	0	0	0	0	0	0	0	0	0	0	0	0	0
GCA_000645595.1	VET1024S	98.456	0	0	0	0	0	0	0	0	0	0	0	0	0	0	0	0	0	0	0
GCA_000645615.1	VET1025S	98.463	0	0	0	0	0	0	0	0	0	0	0	0	0	0	0	0	0	0	0
GCA_000645635.1	VET1026S	98.463	0	0	0	0	0	0	0	0	0	0	0	0	0	0	0	0	0	0	0
GCA_000646015.1	VET1646S	98.463	0	0	0	0	0	0	0	0	0	0	0	0	0	0	0	0	0	0	0
GCA_000646035.1	VET1653S	0	0	0	0	0	0	0	0	0	0	0	0	0	0	0	0	0	0	0	0
GCA_003011195.1	SCPM-O-B-8380	97.872	0	0	0	0	0	0	0	0	0	0	0	0	0	0	0	0	0	0	0
GCA_004152665.1	SCPM-O-B-8476	97.872	0	0	0	0	0	0	0	0	0	0	0	0	0	0	0	0	0	0	0
GCA_004152675.1	SCPM-O-B-8475	97.872	0	0	0	0	0	0	0	0	0	0	0	0	0	0	0	0	0	0	0
GCA_004152765.1	SCPM-O-B-8470	98.463	0	0	0	0	0	0	0	0	0	0	0	0	0	0	0	0	0	0	0
GCA_000205385.2	21193	98.463	0	0	0	0	0	0	0	0	0	0	0	0	0	0	0	0	0	0	0
GCA_000215405.2	21305	99.409	0	0	0	0	0	0	0	0	0	0	0	0	99.928	100	0	0	0	0	2
GCA_000221765.2	21266	97.872	0	0	0	0	0	0	0	0	0	0	0	0	0	0	0	0	0	0	0
GCA_000239595.2	21340	99.409	0	0	0	0	0	0	0	0	0	0	0	0	0	0	0	0	0	0	0
GCA_000242575.2	21333	98.227	99.78	0	0	100	0	0	0	0	0	0	0	0	100	0	0	0	0	0	3
GCA_000350425.2	KLT6	0	0	0	0	0	0	0	0	0	0	0	0	0	0	0	0	0	0	0	0
GCA_000401575.1	103564	98.227	99.78	0	0	100	0	0	0	0	0	0	0	0	100	0	0	0	0	0	3
GCA_000403685.1	S1800	98.227	99.78	0	0	100	0	0	0	0	0	0	0	0	100	0	0	0	0	0	3
GCA_000530855.1	S1475	98.227	99.78	0	0	100	0	0	0	0	0	0	0	0	100	0	0	0	0	0	3
GCA_000564915.1	HST-107	98.227	99.67	0	0	100	0	0	0	0	0	0	0	0	100	0	0	0	0	0	3
GCA_000564935.1	JS046	98.227	99.67	0	0	100	0	98.929	0	0	0	0	0	0	0	0	0	0	0	0	3
GCA_000582725.1	S0924	98.227	99.642	0	0	100	0	99.048	0	0	0	0	0	0	100	0	0	0	0	0	4
GCA_000582805.1	S1805	98.227	99.17	0	0	100	0	0	0	0	0	0	0	0	100	0	0	0	0	0	3
GCA_000590395.1	CUHK_HK188	99.764	0	0	0	0	0	0	0	0	0	0	0	0	0	0	0	0	0	0	0
GCA_000626995.1	21338	98.463	0	0	0	0	0	0	0	0	0	0	0	0	0	0	0	0	0	0	0
GCA_000683135.1	VET1373S	98.463	0	0	0	0	0	0	0	0	0	0	0	0	0	0	0	0	0	0	0
GCA_000683155.1	VET1368S	98.463	0	0	0	0	0	0	0	0	0	0	0	0	0	0	0	0	0	0	0
GCA_000705415.1	SA5-LAU	98.227	99.67	0	0	100	0	0	0	0	0	0	0	0	0	0	0	0	0	0	2
GCA_000705435.1	SA6-LAU	98.227	99.78	0	0	100	0	0	0	0	0	0	0	0	100	0	0	0	0	0	3
GCA_000705475.1	SA7-LAU	99.9	0	0	0	0	0	0	0	0	0	0	0	0	0	0	0	0	0	0	0
GCA_000708385.1	SA9-LAU	98.227	99.78	0	0	100	0	98.912	0	0	0	0	0	0	0	0	0	0	0	0	3
GCA_000708445.1	SA12-LAU	98.227	99.78	0	0	100	0	0	0	0	0	0	0	0	100	0	0	0	0	0	3
GCA_000877865.1	SA-085	0	0	0	0	0	0	0	0	0	0	0	0	0	0	0	0	0	0	0	0
GCA_000878095.1	SA-067	0	0	0	0	0	0	0	0	0	0	0	0	0	0	0	0	0	0	0	0
GCA_001019045.2	FDAARGOS_36	0	0	0	0	0	0	0	0	0	0	0	0	0	0	0	0	0	0	0	0
GCA_001722595.1	NML151290	98.463	0	0	0	0	0	0	0	0	0	0	0	0	0	0	0	0	0	0	0
GCA_002930565.1	HU-85a	99.882	0	0	0	0	0	0	0	0	0	0	0	0	0	0	0	0	0	0	0
GCA_003017495.1	29397-1	99.409	0	0	0	0	0	0	0	0	0	0	0	0	0	0	0	0	0	0	0
GCA_003038635.1	SAM-6	98.227	0	0	0	100	0	0	0	0	0	0	0	0	100	0	0	0	0	0	2
GCA_003237115.1	CM153	98.463	0	0	0	0	0	0	0	0	0	0	0	0	0	0	0	0	0	0	0
GCA_003238285.1	CM96	98.347	0	0	0	0	0	0	0	0	0	0	0	0	0	0	0	0	0	0	0
GCA_003417085.1	M1C002	0	0	0	0	0	0	0	0	0	0	0	0	0	0	0	0	0	0	0	0
GCA_003417165.1	M1C023	0	0	0	0	0	0	0	0	0	0	0	0	0	0	0	0	0	0	0	0
GCA_003417205.1	M1C025	97.872	0	0	0	0	0	0	0	0	0	0	0	0	0	0	0	0	0	0	0
GCA_003417895.1	M1C056	0	0	0	0	0	0	0	0	0	0	0	0	0	0	0	0	0	0	0	0
GCA_003418515.1	M1K006	0	0	0	0	0	0	0	0	0	0	0	0	0	0	0	0	0	0	0	0
GCA_003418735.1	M1K021	99.409	0	0	0	0	0	0	0	0	0	0	0	0	0	0	0	0	0	0	0
GCA_003419405.1	M1K051	0	0	0	0	0	0	0	0	0	0	0	0	0	0	0	0	0	0	0	0
GCA_003419525.1	M1K095	99.882	0	0	0	0	0	0	0	0	0	0	0	0	0	0	0	0	0	0	0
GCA_003419665.1	M1K122	97.872	0	0	0	0	0	0	0	0	0	0	0	0	0	0	0	0	0	0	0
GCA_003420345.1	M1K214	0	0	0	0	0	0	0	0	0	0	0	0	0	0	0	0	0	0	0	0
GCA_003420385.1	M1K221	0	0	0	0	0	0	0	0	0	0	0	0	0	0	0	0	0	0	0	0
GCA_003421065.1	M6C061	0	0	0	0	0	0	0	0	0	0	0	0	0	0	0	0	0	0	0	0
GCA_003421185.1	M6C070	97.872	0	0	0	0	0	0	0	0	0	0	0	0	0	0	0	0	0	0	0
GCA_003421445.1	M6K034	99.768	100	0	0	0	0	0	0	0	0	0	0	0	0	0	0	0	0	0	1
GCA_003421505.1	M6K039	0	0	0	0	0	0	0	0	0	0	0	0	0	0	0	0	0	0	0	0
GCA_003421545.1	M6K043	0	0	0	0	0	0	0	0	0	0	0	0	0	0	0	0	0	0	0	0
GCA_003421905.1	M6K078	99.409	100	0	0	0	0	0	0	0	0	0	0	0	0	0	0	0	0	0	1
GCA_003422025.1	M6K098	0	0	0	0	0	0	0	0	0	0	0	0	0	0	0	0	0	0	0	0
GCA_003422645.1	M6K164	0	0	0	0	0	0	0	0	0	0	0	0	0	0	0	0	0	0	0	0
GCA_003422985.1	M6K207	0	0	0	0	0	0	0	0	0	0	0	0	0	0	0	0	0	0	0	0
GCA_003423045.1	M6K218	99.291	0	0	0	0	0	0	0	0	0	0	0	0	0	0	0	0	0	0	0
GCA_003423465.1	M6K221	0	0	0	0	0	0	99.048	0	0	0	0	0	0	0	0	0	0	0	0	1
GCA_003424205.1	M1KS0501_1	97.872	0	0	0	0	0	0	0	0	0	0	0	0	0	0	0	0	0	0	0
GCA_003425025.1	M6KS0367_3	0	0	0	0	0	0	0	0	0	0	0	0	0	0	0	0	0	0	0	0
GCA_003425165.1	M6KS0526_2	0	100	0	0	0	0	0	0	0	0	0	0	0	0	0	0	0	0	0	1
GCA_003425245.1	M6KS0560_2	0	0	0	0	0	0	0	0	0	0	0	0	0	0	0	0	0	0	0	0
GCA_003427095.1	M6K020	97.636	0	0	0	0	0	0	0	0	0	0	0	0	0	0	0	0	0	0	0
GCA_003719845.1	CFBR-213	0	0	0	0	0	0	0	0	0	0	0	0	0	0	0	0	0	0	0	0
GCA_004153585.1	SA_ME1	98.227	99.78	0	0	100	0	98.912	0	0	0	0	0	0	0	0	0	0	0	0	3
GCA_004328135.1	SCPM-O-B-8477	97.872	0	0	0	0	0	0	0	0	0	0	0	0	0	0	0	0	0	0	0
GCA_005280145.1	2599	99.409	100	0	0	0	0	99.177	0	0	0	0	0	0	0	0	0	0	0	0	2
GCA_005771415.1	YNSA10	99.409	0	0	0	0	0	0	0	0	0	0	0	0	0	0	0	0	0	0	0
GCA_005861605.1	YNSA10	99.409	0	0	0	0	0	0	0	0	0	0	0	0	0	0	0	0	0	0	0
GCA_006385695.1	GSJ/2016-SA-001	99.882	0	0	0	0	0	0	0	0	0	0	0	0	0	0	0	0	0	0	0
GCA_900039825.1	st1470	98.463	0	0	0	0	0	0	0	0	0	0	0	0	0	0	0	0	0	0	0
GCA_900039945.1	st1624	98.463	0	0	0	0	0	0	0	0	0	0	0	0	0	0	0	0	0	0	0
GCA_900040725.1	st343	98.463	0	0	0	0	0	0	0	0	0	0	0	0	0	0	0	0	0	0	0
GCA_900041085.1	st1854	98.463	0	0	0	0	0	0	0	0	0	0	0	0	100	0	0	0	0	0	1
GCA_900046325.1	st2073	98.227	99.78	0	0	100	0	0	0	0	0	0	0	0	100	0	0	0	0	0	3
GCA_900046425.1	st2193	98.463	0	0	0	0	0	0	0	0	0	0	0	0	0	0	0	0	0	0	0
GCA_900054715.1	st2581	99.9	99.78	0	0	0	0	0	0	0	0	0	0	0	0	0	0	0	0	0	1
GCA_900098135.1	GKP138-4	99.409	0	0	0	0	0	0	0	0	0	0	0	0	0	0	0	0	0	0	0
GCA_900125165.1	3688STDY6125027	99.409	0	0	0	0	0	0	0	0	0	0	0	0	100	0	0	0	0	0	1
GCA_900125415.1	3688STDY6124819	98.227	0	0	0	0	0	0	0	0	0	0	0	0	100	0	0	0	0	0	1
GCA_900125795.1	3688STDY6124866	0	0	0	0	0	0	0	0	0	0	0	0	0	99.909	0	0	0	0	0	1
GCA_900126195.1	3688STDY6124926	95.863	0	0	0	0	0	0	0	0	0	0	0	0	0	0	0	0	0	0	0
GCA_900126515.1	3688STDY6125059	99.409	99.874	0	0	0	0	0	0	0	0	0	0	0	100	0	0	0	0	0	2
GCA_900127895.1	3688STDY6124853	99.409	0	0	0	0	0	0	0	0	0	0	0	0	0	0	0	0	0	0	0
GCA_900155835.1	CHUV_15	97.991	0	0	0	0	0	0	0	0	0	0	0	0	0	0	0	0	0	0	0
GCA_900457925.1	NCTC6134	0	0	0	0	0	0	0	0	0	0	0	0	0	0	0	0	0	0	0	0
GCA_001063705.1	57_SAUR	99.409	100	0	0	0	0	99.864	0	0	0	0	0	0	0	0	0	0	0	0	2
GCA_001066495.1	82_SAUR	99.409	100	0	0	0	0	99.864	0	0	0	0	0	0	0	0	0	0	0	0	2
GCA_001658065.1	FP_SA_ST25	98.345	0	0	0	0	0	0	0	0	0	0	0	0	0	0	0	0	0	0	0
GCA_002124675.1	CFSA171	98.463	0	0	0	0	0	0	0	0	0	0	0	0	0	0	0	0	0	0	0
GCA_002916565.1	clinical 1	99.95	0	0	0	0	0	0	0	0	0	0	0	0	0	0	0	0	0	0	0
GCA_003309645.1	S1AH041	99.409	100	0	0	0	0	99.864	0	0	0	0	0	0	0	0	0	0	0	0	2
GCA_003309655.1	S1AG056	0	0	0	0	0	0	0	0	0	0	0	0	0	0	0	0	0	0	0	0
GCA_003309705.1	S1AD014	99.409	100	0	0	0	0	99.864	0	0	0	0	0	0	99.928	0	0	0	0	0	3
GCA_003309935.1	S1AK033	99.882	0	0	0	0	0	0	0	0	0	0	0	0	0	0	0	0	0	0	0
GCA_003417145.1	M1C017	0	0	0	0	0	0	0	0	0	0	0	0	0	0	0	0	0	0	0	0
GCA_003417185.1	M1C024	0	0	0	0	0	0	0	0	0	0	0	0	0	0	0	0	0	0	0	0
GCA_003418075.1	M1C061	0	0	0	0	0	0	0	0	0	0	0	0	0	0	0	0	0	0	0	0
GCA_003419565.1	M1K098	0	0	0	0	0	0	0	0	0	0	0	0	0	0	0	0	0	0	0	0
GCA_003419625.1	M1K120	0	0	0	0	0	0	0	0	0	0	0	0	0	0	0	0	0	0	0	0
GCA_003419825.1	M1K150	98.463	0	0	0	0	0	0	0	0	0	0	0	0	0	0	0	0	0	0	0
GCA_003419845.1	M1K151	97.872	0	0	0	0	0	0	0	0	0	0	0	0	0	0	0	0	0	0	0
GCA_003419925.1	M1K155	0	0	0	0	0	0	0	0	0	0	0	0	0	0	0	0	0	0	0	0
GCA_003420045.1	M1K162	0	0	0	0	0	0	0	0	0	0	0	0	0	0	0	0	0	0	0	0
GCA_003420145.1	M1K172	0	0	0	0	0	0	0	0	0	0	0	0	0	0	0	0	0	0	0	0
GCA_003420505.1	M6C013	99.409	0	0	0	0	0	0	0	0	0	0	0	0	0	0	0	0	0	0	0
GCA_003420705.1	M6C034	0	0	0	0	0	0	0	0	0	0	0	0	0	0	0	0	0	0	0	0
GCA_003420755.1	M6C037	0	0	0	0	0	0	0	0	0	0	0	0	0	0	0	0	0	0	0	0
GCA_003420865.1	M6C042	0	0	0	0	0	0	0	0	0	0	0	0	0	0	0	0	0	0	0	0
GCA_003420965.1	M6C051	99.409	0	0	0	0	0	0	0	0	0	0	0	0	0	0	0	0	0	0	0
GCA_003421025.1	M6C056	0	0	0	0	0	0	0	0	0	0	0	0	0	0	0	0	0	0	0	0
GCA_003421625.1	M6K051	99.768	100	0	0	0	0	0	0	0	0	0	0	0	0	0	0	0	0	0	1
GCA_003421665.1	M6K055	0	0	0	0	0	0	0	0	0	0	0	0	0	0	0	0	0	0	0	0
GCA_003421705.1	M6K062	0	0	0	0	0	0	0	0	0	0	0	0	0	0	0	0	0	0	0	0
GCA_003422005.1	M6K095	99.882	0	0	0	0	0	0	0	0	0	0	0	0	0	0	0	0	0	0	0
GCA_003422505.1	M6K152	0	0	0	0	0	0	0	0	0	0	0	0	0	0	0	0	0	0	0	0
GCA_003422545.1	M6K155	0	0	0	0	0	0	0	0	0	0	0	0	0	0	0	0	0	0	0	0
GCA_003422605.1	M6K162	0	0	0	0	0	0	0	0	0	0	0	0	0	0	0	0	0	0	0	0
GCA_003422685.1	M6K172	0	0	0	0	0	0	0	0	0	0	0	0	0	0	0	0	0	0	0	0
GCA_003422845.1	M6K188	0	0	0	0	0	0	0	0	0	0	0	0	0	0	0	0	0	0	0	0
GCA_003422865.1	M6K190	99.409	0	0	0	0	0	0	0	0	0	0	0	0	0	0	0	0	0	0	0
GCA_003423585.1	M6K229	97.872	0	0	0	0	0	0	0	0	0	0	0	0	0	0	0	0	0	0	0
GCA_003424125.1	M1KS0367_1	0	0	0	0	0	0	0	0	0	0	0	0	0	0	0	0	0	0	0	0
GCA_003424985.1	M6KS0367_1	0	0	0	0	0	0	0	0	0	0	0	0	0	0	0	0	0	0	0	0
GCA_003425225.1	M6KS0560_1	0	0	0	0	0	0	0	0	0	0	0	0	0	0	0	0	0	0	0	0
GCA_005860885.1	YNSA504	99.882	0	0	0	0	0	0	0	0	0	0	0	0	0	0	0	0	0	0	0
GCA_005861625.1	YNSA5	99.409	0	0	0	0	0	98.912	0	0	0	0	0	0	0	0	0	0	0	0	1
GCA_005861815.1	YNSA274	99.409	0	0	0	0	0	0	0	0	0	0	0	0	0	0	0	0	0	0	0
GCA_900097325.1	040H	99.409	0	0	0	0	0	0	0	0	0	0	0	0	0	0	0	0	0	0	0
GCA_900124685.1	3688STDY6124974	99.409	0	0	0	0	0	0	0	0	0	0	0	0	0	0	0	0	0	0	0
GCA_900125755.1	3688STDY6124861	99.291	100	0	0	0	0	99.177	0	0	0	0	0	0	100	0	0	0	0	0	3
GCA_900125835.1	3688STDY6124872	98.227	0	0	0	0	0	0	0	0	0	0	0	0	0	0	0	0	0	0	0
GCA_900126255.1	3688STDY6124932	0	0	0	0	0	0	0	0	0	0	0	0	0	0	0	0	0	0	0	0
GCA_900126755.1	3688STDY6125101	95.863	0	0	0	0	0	0	0	0	0	0	0	0	0	0	0	0	0	0	0
GCA_900128045.1	3688STDY6124876	99.409	0	0	0	0	0	0	0	0	0	0	0	0	0	0	0	0	0	0	0
GCA_900250325.1	H1413	98.227	99.78	0	0	100	0	0	0	0	0	0	0	0	100	0	0	0	0	0	3
GCA_900250395.1	H1468	98.227	99.78	0	0	100	0	99.048	0	0	0	0	0	0	100	0	0	0	0	0	4
GCA_900250595.1	H1664	98.108	99.78	0	0	100	0	0	0	0	0	0	0	0	100	0	0	0	0	0	3
GCA_900250745.1	H1823	98.227	99.78	0	0	100	0	99.01	0	0	0	0	0	0	100	0	0	0	0	0	4
GCA_900251005.1	M3012	98.227	0	0	0	100	0	99.048	0	0	0	0	0	0	100	0	0	0	0	0	3
GCA_900251025.1	M3015	98.227	99.78	0	0	100	0	0	0	0	0	0	0	0	100	0	0	0	0	0	3
GCA_900251515.1	M3587	98.227	0	0	0	100	0	99.048	0	0	0	0	0	0	100	0	0	0	0	0	3
GCA_900251935.1	M3863	99.9	0	0	0	0	0	0	0	0	0	0	0	0	0	0	0	0	0	0	0
GCA_900251955.1	M3946	98.109	0	0	0	100	0	99.048	0	0	0	0	0	0	100	0	0	0	0	0	3
GCA_900252165.1	H1733	98.227	99.78	0	0	100	0	0	0	0	0	0	0	0	100	0	0	0	0	0	3

## Sheet: USA300
Assembly	Strain	beta-lactam	aminoglycoside	colistin	fosfomycin	fusidicacid	glycopeptide	macrolide	nitroimidazole	oxazolidinone	phenicol	quinolone	rifampicin	sulphonamide	tetracycline	trimethoprim	ardA-H2	ardA-H1	Tn916	Tn5801	Resistance without bl
GCA_000013465.1	USA300_FPR3757	99.95	0	0	0	0	0	98.912	0	0	0	0	0	0	99.928	0	0	0	0	0	2
GCA_000017085.1	TCH1516	99.882	99.874	0	0	0	0	98.978	0	0	0	0	0	0	0	0	0	0	0	0	2
GCA_000568455.1	USA300-ISMMS1	99.882	99.874	0	0	0	0	98.978	0	0	0	0	0	0	0	0	0	0	0	0	2
GCA_000695875.1	UA-S391_USA300	0	0	0	0	0	0	0	0	0	0	0	0	0	0	0	0	0	0	0	0
GCA_000815045.1	29b_MRSA	0	0	0	0	0	0	0	0	0	0	0	0	0	0	0	0	0	0	0	0
GCA_000815085.1	31b_MRSA	0	0	0	0	0	0	0	0	0	0	0	0	0	0	0	0	0	0	0	0
GCA_000815125.1	33b	0	0	0	0	0	0	0	0	0	0	0	0	0	0	0	0	0	0	0	0
GCA_000815165.1	26b_MRSA	0	0	0	0	0	0	0	0	0	0	0	0	0	0	0	0	0	0	0	0
GCA_000815205.1	25b_MRSA	0	0	0	0	0	0	0	0	0	0	0	0	0	0	0	0	0	0	0	0
GCA_000815245.1	27b_MRSA	0	0	0	0	0	0	0	0	0	0	0	0	0	0	0	0	0	0	0	0
GCA_001045995.2	HUV05	98.227	99.874	0	0	0	0	0	0	0	0	0	0	0	0	0	0	0	0	0	1
GCA_001046095.2	V2200	97.991	0	0	0	0	0	99.046	0	0	0	0	0	0	100	0	0	0	0	0	2
GCA_001183705.3	USA300_2014.C01	99.882	99.874	0	0	0	0	98.978	0	0	0	0	0	0	0	0	0	0	0	0	2
GCA_001183725.2	USA300_2014.C02	99.882	0	0	0	0	0	99.591	0	0	0	0	0	0	0	0	0	0	0	0	1
GCA_001580515.1	UTSW MRSA 55	99.882	99.748	0	0	0	0	98.978	0	0	0	0	0	0	0	0	0	0	0	0	2
GCA_001717645.3	5118.N	99.882	100	0	0	0	0	99.046	0	0	0	0	0	0	0	0	0	0	0	0	2
GCA_001717685.3	1971.C01	99.882	99.874	0	0	0	0	98.978	0	0	0	0	0	0	0	0	0	0	0	0	2
GCA_001717705.2	1969.N	99.882	0	0	0	0	0	99.591	0	0	0	0	0	0	0	0	0	0	0	0	1
GCA_001717725.2	1625.C01	99.882	99.874	0	0	0	0	98.978	0	0	0	0	0	0	0	0	0	0	0	0	2
GCA_001717975.3	2148.C01	99.882	99.874	0	0	0	0	98.978	0	0	0	0	0	0	0	0	0	0	0	0	2
GCA_001735655.2	3020.C01	99.882	0	0	0	0	0	99.591	0	0	0	0	0	0	0	0	0	0	0	0	1
GCA_001956815.1	USA300_SUR1	99.882	99.874	0	0	0	0	98.978	0	0	0	0	0	0	0	0	0	0	0	0	2
GCA_002000565.1	USA300-SUR9	99.882	99.874	0	0	0	0	99.048	0	0	0	0	0	0	0	100	0	0	0	0	3
GCA_002000585.1	USA300-SUR10	99.882	99.874	0	0	0	0	99.048	0	0	0	0	0	0	0	100	0	0	0	0	3
GCA_002000605.1	USA300-SUR11	99.882	99.874	0	0	0	0	99.048	0	0	0	0	0	0	0	100	0	0	0	0	3
GCA_002000625.1	USA300-SUR12	99.882	99.874	0	0	0	0	98.978	0	0	0	0	0	0	0	100	0	0	0	0	3
GCA_002000645.1	USA300-SUR13	99.882	99.874	0	0	0	0	98.978	0	0	0	0	0	0	0	100	0	0	0	0	3
GCA_002000665.1	USA300-SUR14	99.882	99.874	0	0	0	0	98.978	0	0	0	0	0	0	0	100	0	0	0	0	3
GCA_002000685.1	USA300-SUR15	99.882	99.874	0	0	0	0	98.912	0	0	0	0	0	0	0	100	0	0	0	0	3
GCA_002000705.1	USA300-SUR16	99.882	99.874	0	0	0	0	98.978	0	0	0	0	0	0	0	100	0	0	0	0	3
GCA_002000725.1	USA300-SUR17	99.882	99.874	0	0	0	0	98.978	0	0	0	0	0	0	0	100	0	0	0	0	3
GCA_002000745.1	USA300-SUR18	99.882	99.874	0	0	0	0	98.978	0	0	0	0	0	0	0	100	0	0	0	0	3
GCA_002000765.1	USA300-SUR19	99.882	99.874	0	0	0	0	98.978	0	0	0	0	0	0	0	100	0	0	0	0	3
GCA_002000785.1	USA300-SUR20	99.882	99.874	0	0	0	0	98.978	0	0	0	0	0	0	0	100	0	0	0	0	3
GCA_002000805.1	USA300-SUR21	99.882	99.874	0	0	0	0	98.978	0	0	0	0	0	0	0	100	0	0	0	0	3
GCA_002000825.1	USA300-SUR22	99.882	99.874	0	0	0	0	98.978	0	0	0	0	0	0	0	100	0	0	0	0	3
GCA_002000845.1	USA300-SUR23	99.882	99.874	0	0	0	0	98.978	0	0	0	0	0	0	0	100	0	0	0	0	3
GCA_002000865.1	USA300-SUR24	99.882	99.874	0	0	0	0	98.912	0	0	0	0	0	0	0	100	0	0	0	0	3
GCA_002085525.1	JE2	99.95	0	0	0	0	0	0	0	0	0	0	0	0	0	0	0	0	0	0	0
GCA_002088995.1	C2406	0	0	0	0	0	0	0	0	0	0	0	0	0	0	0	0	0	0	0	0
GCA_003073395.1	CIT	0	0	0	0	0	0	0	0	0	0	0	0	0	0	0	0	0	0	0	0
GCA_003073415.1	CAR	0	0	0	0	0	0	0	0	0	0	0	0	0	0	0	0	0	0	0	0
GCA_003073435.1	OXLIM	0	0	0	0	0	0	0	0	0	0	0	0	0	0	0	0	0	0	0	0
GCA_003193685.1	AR_0223	99.95	0	0	0	0	0	0	0	0	0	0	0	0	0	0	0	0	0	0	0
GCA_003193725.1	AR_0216	99.764	99.874	0	0	0	0	98.978	0	0	0	0	0	0	0	0	0	0	0	0	2
GCA_003193965.1	AR_0225	99.764	99.874	0	0	0	0	98.978	0	0	0	0	0	0	0	0	0	0	0	0	2
GCA_003203595.1	AR_0226	99.882	99.874	0	0	0	0	98.978	0	0	0	0	0	0	0	0	0	0	0	0	2
GCA_003595365.1	USA300-SUR1	99.882	99.874	0	0	0	0	98.978	0	0	0	0	0	0	0	0	0	0	0	0	2
GCA_003595385.1	USA300-SUR2	99.882	99.874	0	0	0	0	98.978	0	0	0	0	0	0	0	0	0	0	0	0	2
GCA_003595405.1	USA300-SUR3	99.882	99.874	0	0	0	0	98.978	0	0	0	0	0	0	0	100	0	0	0	0	3
GCA_003595425.1	USA300-SUR4	99.882	99.874	0	0	0	0	99.048	0	0	0	0	0	0	0	100	0	0	0	0	3
GCA_003595445.1	USA300-SUR5	99.882	99.874	0	0	0	0	99.048	0	0	0	0	0	0	0	100	0	0	0	0	3
GCA_003595465.1	USA300-SUR6	99.882	99.874	0	0	0	0	98.978	0	0	0	0	0	0	0	100	0	0	0	0	3
GCA_003595485.1	USA300-SUR7	99.882	99.874	0	0	0	0	98.978	0	0	0	0	0	0	0	100	0	0	0	0	3
GCA_003595505.1	USA300-SUR8	99.882	99.874	0	0	0	0	99.048	0	0	0	0	0	0	0	100	0	0	0	0	3
GCA_004118995.1	LAC	99.882	99.874	0	0	0	0	98.978	0	0	0	0	0	0	0	0	0	0	0	0	2
GCA_004614295.1	C8879	0	0	0	0	0	0	0	0	0	0	0	0	0	0	0	0	0	0	0	0
GCA_004614315.1	JK3137	0	0	0	0	0	0	0	0	0	0	0	0	0	0	0	0	0	0	0	0
GCA_005885975.1	Col52-A5	99.95	0	0	0	0	0	99.046	0	0	0	0	0	0	100	0	0	0	0	0	2
GCA_900635265.1	NCTC12233	0	0	0	0	0	0	0	0	0	0	0	0	0	0	0	0	0	0	0	0
GCA_002993865.1	NRS384	99.95	0	0	0	0	0	0	0	0	0	0	0	0	99.928	0	0	0	0	0	1
GCA_001471715.2	FDAARGOS_140	99.95	0	0	0	0	0	0	0	0	0	0	0	0	0	0	0	0	0	0	0
GCA_000187145.1	MRSA131	97.991	0	0	0	0	0	99.046	0	0	0	0	0	0	0	0	0	0	0	0	1
GCA_000359765.1	HI010	99.882	99.874	0	0	0	0	98.978	0	0	0	0	0	0	0	0	0	0	0	0	2
GCA_000359785.1	HI013	99.882	99.874	0	0	0	0	98.841	0	0	0	0	0	0	0	0	0	0	0	0	2
GCA_000359805.1	HI022	99.882	99.874	0	0	0	0	98.978	0	0	0	0	0	0	0	0	0	0	0	0	2
GCA_000359825.1	HI049B	99.882	99.874	0	0	0	0	98.978	0	0	0	0	0	0	0	0	0	0	0	0	2
GCA_000359845.1	HI049C	99.882	99.874	0	0	0	0	98.978	0	0	0	0	0	0	0	0	0	0	0	0	2
GCA_000359865.1	HI049	99.882	99.874	0	0	0	0	98.978	0	0	0	0	0	0	0	0	0	0	0	0	2
GCA_000359885.1	HI111	99.882	99.874	0	0	0	0	98.978	0	0	0	0	0	0	0	0	0	0	0	0	2
GCA_000359905.1	HI168	99.882	100	0	0	0	0	98.978	0	0	0	0	0	0	0	0	0	0	0	0	2
GCA_000361445.1	M0531	97.991	0	0	0	0	0	99.184	0	0	0	0	0	0	0	0	0	0	0	0	1
GCA_000537955.1	LAMC0024	99.882	99.874	0	0	0	0	98.978	0	0	0	0	0	0	0	0	0	0	0	0	2
GCA_000537995.1	AMMC6040	99.882	99.874	0	0	0	0	98.978	0	0	0	0	0	0	0	0	0	0	0	0	2
GCA_000538035.1	AMMC6051	99.882	99.874	0	0	0	0	98.978	0	0	0	0	0	0	0	0	0	0	0	0	2
GCA_000538175.1	SMMC0005	99.882	99.874	0	0	0	0	98.444	0	0	0	0	0	0	0	0	0	0	0	0	2
GCA_000538195.1	WMCA6041	99.882	99.874	0	0	0	0	98.978	0	0	0	0	0	0	0	0	0	0	0	0	2
GCA_000538215.1	WAMC6010	99.882	99.874	0	0	0	0	98.978	0	0	0	0	0	0	0	0	0	0	0	0	2
GCA_000538255.1	SJUD6063	99.882	99.874	0	0	0	0	98.978	0	0	0	0	0	0	0	0	0	0	0	0	2
GCA_000538295.1	MISS6017	99.882	99.874	0	0	0	0	98.978	0	0	0	0	0	0	0	0	0	0	0	0	2
GCA_000538395.1	SJOS6076	99.882	99.874	0	0	0	0	98.978	0	0	0	0	0	0	0	0	0	0	0	0	2
GCA_000538455.1	SCOA6011	99.95	0	0	0	0	0	0	0	0	0	0	0	0	0	0	0	0	0	0	0
GCA_000538575.1	UCIM6018	99.882	99.874	0	0	0	0	99.048	0	0	0	0	0	0	0	0	0	0	0	0	2
GCA_000538635.1	PLAC6017	99.882	99.874	0	0	0	0	98.978	0	0	0	0	0	0	0	0	0	0	0	0	2
GCA_000538655.1	SJUD6086	99.882	99.874	0	0	0	0	98.978	0	0	0	0	0	0	0	0	0	0	0	0	2
GCA_000538695.1	COAS6038	99.882	99.874	0	0	0	0	99.184	0	0	0	0	0	0	0	0	0	0	0	0	2
GCA_000538735.1	SJUD6087	99.882	99.874	0	0	0	0	98.978	0	0	0	0	0	0	0	0	0	0	0	0	2
GCA_000538815.1	WMCS6039	99.882	99.874	0	0	0	0	98.978	0	0	0	0	0	0	0	0	0	0	0	0	2
GCA_000538875.1	LPIH6021	99.882	99.874	0	0	0	0	98.444	0	0	0	0	0	0	0	0	0	0	0	0	2
GCA_000538895.1	OCMM6045	99.882	99.874	0	0	0	0	98.978	0	0	0	0	0	0	0	0	0	0	0	0	2
GCA_000538975.1	AMMC6070	99.882	99.874	0	0	0	0	98.978	0	0	0	0	0	0	0	0	0	0	0	0	2
GCA_000538995.1	AMMC6071	99.882	0	0	0	0	0	98.978	0	0	0	0	0	0	0	0	0	0	0	0	1
GCA_000539015.1	AMMC6072	99.882	99.874	0	0	0	0	98.909	0	0	0	0	0	0	0	0	0	0	0	0	2
GCA_000539055.1	AMMC6075	99.882	99.874	0	0	0	0	98.978	0	0	0	0	0	0	0	0	0	0	0	0	2
GCA_000539075.1	MISS6110	99.95	0	0	0	0	0	0	0	0	0	0	0	0	0	0	0	0	0	0	0
GCA_000539115.1	LAMC0050	99.527	0	0	0	0	0	0	0	0	0	0	0	0	0	0	0	0	0	0	0
GCA_000539255.1	HOAG6084	99.95	100	0	0	0	0	0	0	0	0	0	0	0	0	0	0	0	0	0	1
GCA_000539335.1	SJOS6001	99.882	99.874	0	0	0	0	98.978	0	0	0	0	0	0	100	0	0	0	0	0	3
GCA_000539395.1	AMMC6002	99.882	99.874	0	0	0	0	98.978	0	0	0	0	0	0	0	0	0	0	0	0	2
GCA_000539415.1	AMMC6003	99.882	99.874	0	0	0	0	98.978	0	0	0	0	0	0	0	0	0	0	0	0	2
GCA_000539455.1	AMMC6011	99.882	99.874	0	0	0	0	98.978	0	0	0	0	0	0	0	0	0	0	0	0	2
GCA_000539475.1	AMMC6008	99.882	99.874	0	0	0	0	98.978	0	0	0	0	0	0	0	0	0	0	0	0	2
GCA_000539515.1	LAMC0001	99.882	99.874	0	0	0	0	98.978	0	0	0	0	0	0	0	0	0	0	0	0	2
GCA_000539655.1	SJUD6015	100	100	0	0	0	0	0	0	0	0	0	0	0	0	0	0	0	0	0	1
GCA_000539735.1	HOAG6017	99.882	99.874	0	0	0	0	98.978	0	0	0	0	0	0	0	0	0	0	0	0	2
GCA_000539795.1	LAMC0013	99.882	100	0	0	0	0	0	0	0	0	0	0	0	0	0	0	0	0	0	1
GCA_000539815.1	AMMC6015	99.95	100	0	0	0	0	98.978	0	0	0	0	0	0	0	0	0	0	0	0	2
GCA_000539895.1	HBHO6002	99.95	99.874	0	0	0	0	98.978	0	0	0	0	0	0	0	0	0	0	0	0	2
GCA_000539935.1	LPIH6001	99.882	99.874	0	0	0	0	98.978	0	0	0	0	0	0	0	0	0	0	0	0	2
GCA_000540055.1	UCIM6009	99.882	99.874	0	0	0	0	98.978	0	0	0	0	0	0	0	0	0	0	0	0	2
GCA_000540115.1	SCOA6006	99.882	99.874	0	0	0	0	98.978	0	0	0	0	0	0	0	0	0	0	0	0	2
GCA_000540195.1	COAS6049	99.882	99.874	0	0	0	0	98.978	0	0	0	0	0	0	99.887	0	0	0	0	0	3
GCA_000540215.1	KINW6003	99.882	0	0	0	0	0	0	0	0	0	0	0	0	0	0	0	0	0	0	0
GCA_000540335.1	MISS6033	99.882	0	0	0	0	0	0	0	0	0	0	0	0	0	0	0	0	0	0	0
GCA_000540395.1	COLL6021	99.882	99.874	0	0	0	0	98.978	0	0	0	0	0	0	0	0	0	0	0	0	2
GCA_000540415.1	SJUD6040	99.882	99.874	0	0	0	0	98.978	0	0	0	0	0	0	0	0	0	0	0	0	2
GCA_000540475.1	LPIH6011	99.882	0	0	0	0	0	98.444	0	0	0	0	0	0	0	0	0	0	0	0	1
GCA_000540535.1	PLAC6004	99.95	99.874	0	0	0	0	98.978	0	0	0	0	0	0	0	0	0	0	0	0	2
GCA_000540555.1	SCLE6011	99.882	0	0	0	0	0	98.978	0	0	0	0	0	0	0	0	0	0	0	0	1
GCA_000540675.1	MISS6125	99.882	99.874	0	0	0	0	98.978	0	0	0	0	0	0	0	0	0	0	0	0	2
GCA_000540695.1	UCIM6056	99.882	99.874	0	0	0	0	98.978	0	0	0	0	0	0	0	0	0	0	0	0	2
GCA_000540835.1	COAS6052	99.882	99.874	0	0	0	0	98.978	0	0	0	0	0	0	0	0	0	0	0	0	2
GCA_000540955.1	SJUD6110	99.882	99.748	0	0	0	0	98.978	0	0	0	0	0	0	0	0	0	0	0	0	2
GCA_000541035.1	MISS6119	99.882	0	0	0	0	0	0	0	0	0	0	0	0	0	0	0	0	0	0	0
GCA_000541075.1	COAS6055	99.882	100	0	0	0	0	98.978	0	0	0	0	0	0	0	0	0	0	0	0	2
GCA_000541135.1	COAS6059	99.882	99.874	0	0	0	0	98.978	0	0	0	0	0	0	0	0	0	0	0	0	2
GCA_000541155.1	WMCS6055	99.882	99.874	0	0	0	0	99.048	0	0	0	0	0	0	0	0	0	0	0	0	2
GCA_000541195.1	GGMC6049	99.882	99.874	0	0	0	0	99.184	0	0	0	0	0	0	0	0	0	0	0	0	2
GCA_000541435.1	WMCA6025	99.882	99.874	0	0	0	0	98.978	0	0	0	0	0	0	0	0	0	0	0	0	2
GCA_000541775.1	FVRH6052	99.882	99.874	0	0	0	0	98.978	0	0	0	0	0	0	0	0	0	0	0	0	2
GCA_000541835.1	MISS6057	99.882	99.874	0	0	0	0	98.978	0	0	0	0	0	0	0	0	0	0	0	0	2
GCA_000541875.1	SCLE6029	99.882	0	0	0	0	0	98.978	0	0	0	0	0	0	0	0	0	0	0	0	1
GCA_000541895.1	WMCS6079	99.882	99.874	0	0	0	0	98.978	0	0	0	0	0	0	0	0	0	0	0	0	2
GCA_000541915.1	TUSH6007	99.882	99.874	0	0	0	0	98.978	0	0	0	0	0	0	0	0	0	0	0	0	2
GCA_000541975.1	UCIM6101	99.764	0	0	0	0	0	0	0	0	0	0	0	0	0	0	0	0	0	0	0
GCA_000541995.1	FVRH6067	99.882	99.874	0	0	0	0	98.978	0	0	0	0	0	0	0	0	0	0	0	0	2
GCA_000542015.1	FVRH6074	99.882	100	0	0	0	0	100	0	0	0	0	0	0	0	0	0	0	0	0	2
GCA_000542075.1	GGMC6018	99.882	99.874	0	0	0	0	98.978	0	0	0	0	0	0	0	0	0	0	0	0	2
GCA_000542095.1	COAS6087	99.882	99.874	0	0	0	0	98.978	0	0	0	0	0	0	0	0	0	0	0	0	2
GCA_000542115.1	SCLE6035	99.882	99.874	0	0	0	0	98.978	0	0	0	0	0	0	0	0	0	0	0	0	2
GCA_000542295.1	WAMC6043	99.882	99.874	0	0	0	0	98.978	0	0	0	0	0	0	0	0	0	0	0	0	2
GCA_000542315.1	OCMM6102	99.882	99.874	0	0	0	0	98.978	0	0	0	0	0	0	0	0	0	0	0	0	2
GCA_000542595.1	WMCA6092	99.882	99.874	0	0	0	0	98.978	0	0	0	0	0	0	0	0	0	0	0	0	2
GCA_000542655.1	LAMC6115	99.409	100	0	0	0	0	0	0	0	0	0	0	0	0	0	0	0	0	0	1
GCA_000542695.1	PLAC6043	99.882	100	0	0	0	0	98.978	0	0	0	0	0	0	0	0	0	0	0	0	2
GCA_000542745.1	FVRH6131	99.882	0	0	0	0	0	0	0	0	0	0	0	0	0	0	0	0	0	0	0
GCA_000542785.1	COAS6112	99.882	0	0	0	0	0	0	0	0	0	0	0	0	0	0	0	0	0	0	0
GCA_000542805.1	COAS6114	99.882	99.874	0	0	0	0	98.978	0	0	0	0	0	0	0	0	0	0	0	0	2
GCA_000542825.1	FVRH6132	99.95	0	0	0	0	0	99.184	0	0	0	0	0	0	100	0	0	0	0	0	2
GCA_000542845.1	OCMM6137	99.882	99.874	0	0	0	0	98.978	0	0	0	0	0	0	0	0	0	0	0	0	2
GCA_000542865.1	OCMM6140	99.882	99.874	0	0	0	0	98.978	0	0	0	0	0	0	0	0	0	0	0	0	2
GCA_000542905.1	GGMC6036	99.882	0	0	0	0	0	0	0	0	0	0	0	0	0	0	0	0	0	0	0
GCA_000542945.1	CHAP6035	99.882	99.874	0	0	0	0	98.978	0	0	0	0	0	0	0	0	0	0	0	0	2
GCA_000542985.1	HBHO6022	99.882	99.874	0	0	0	0	98.978	0	0	0	0	0	0	0	0	0	0	0	0	2
GCA_000543085.1	UCIM6145	99.882	99.874	0	0	0	0	98.978	0	0	0	0	0	0	0	0	0	0	0	0	2
GCA_000543105.1	UCIM6144	99.882	99.874	0	0	0	0	98.978	0	0	0	0	0	0	0	0	0	0	0	0	2
GCA_000543165.1	UCIM6147	99.95	100	0	0	0	0	100	0	0	0	0	0	0	0	0	0	0	0	0	2
GCA_000543185.1	WAMC6080	99.882	0	0	0	0	0	98.978	0	0	0	0	0	0	0	0	0	0	0	0	1
GCA_000543265.1	FVRH6118	99.882	99.874	0	0	0	0	98.978	0	0	0	0	0	0	100	0	0	0	0	0	3
GCA_000543285.1	OCMM6129	99.882	99.874	0	0	0	0	98.978	0	0	0	0	0	0	0	0	0	0	0	0	2
GCA_000543305.1	CHAP6022	99.882	99.874	0	0	0	0	98.978	0	0	0	0	0	0	0	0	0	0	0	0	2
GCA_000545645.1	M0945	99.95	0	0	0	0	0	98.978	0	0	0	0	0	0	0	0	0	0	0	0	1
GCA_000546065.1	M0982	99.95	0	0	0	0	0	0	0	0	0	0	0	0	0	0	0	0	0	0	0
GCA_000546645.1	M1035	99.882	0	0	0	0	0	98.978	0	0	0	0	0	0	0	0	0	0	0	0	1
GCA_000558645.1	FVRH6021	99.882	99.874	0	0	0	0	99.048	0	0	0	0	0	0	0	0	0	0	0	0	2
GCA_000558725.1	OCMM6071	99.95	0	0	0	0	0	99.184	0	0	0	0	0	0	0	0	0	0	0	0	1
GCA_000558745.1	UCIM6075	99.882	99.874	0	0	0	0	98.978	0	0	0	0	0	0	0	0	0	0	0	0	2
GCA_000558845.1	WMCA6015	99.882	99.874	0	0	0	0	98.978	0	0	0	0	0	0	0	0	0	0	0	0	2
GCA_000559205.1	M81490	99.95	0	0	0	0	0	0	0	0	0	0	0	0	0	0	0	0	0	0	0
GCA_000559245.1	T45974	98.109	100	0	0	0	0	0	0	0	0	0	0	0	0	0	0	0	0	0	1
GCA_000559265.1	W28469	99.95	0	0	0	0	0	0	0	0	0	0	0	0	0	0	0	0	0	0	0
GCA_000559285.1	F41886	99.95	0	0	0	0	0	0	0	0	0	0	0	0	0	0	0	0	0	0	0
GCA_000559365.1	M85201	99.95	0	0	0	0	0	0	0	0	0	0	0	0	0	0	0	0	0	0	0
GCA_000559465.1	F45300	99.95	0	0	0	0	0	0	0	0	0	0	0	0	0	0	0	0	0	0	0
GCA_000559585.1	M92086	99.95	0	0	0	0	0	0	0	0	0	0	0	0	0	0	0	0	0	0	0
GCA_000559625.1	T56203	99.95	0	0	0	0	0	0	0	0	0	0	0	0	0	0	0	0	0	0	0
GCA_000559645.1	W38597	99.95	0	0	0	0	0	0	0	0	0	0	0	0	0	0	0	0	0	0	0
GCA_000559665.1	M13316	99.95	0	0	0	0	0	0	0	0	0	0	0	0	0	0	0	0	0	0	0
GCA_000559685.1	M13384	99.95	0	0	0	0	0	0	0	0	0	0	0	0	0	0	0	0	0	0	0
GCA_000559765.1	W35356	99.95	0	0	0	0	0	0	0	0	0	0	0	0	0	0	0	0	0	0	0
GCA_000559865.1	F54461	99.95	0	0	0	0	0	0	0	0	0	0	0	0	0	0	0	0	0	0	0
GCA_000559965.1	M52055	99.95	0	0	0	0	0	0	0	0	0	0	0	0	0	0	0	0	0	0	0
GCA_000559985.1	W85047	99.95	0	0	0	0	0	0	0	0	0	0	0	0	0	0	0	0	0	0	0
GCA_000560005.1	H60145	99.95	0	0	0	0	0	0	0	0	0	0	0	0	0	0	0	0	0	0	0
GCA_000560105.1	T66282	99.95	0	0	0	0	0	0	0	0	0	0	0	0	0	0	0	0	0	0	0
GCA_000560125.1	T66286	99.95	0	0	0	0	0	0	0	0	0	0	0	0	0	0	0	0	0	0	0
GCA_000560145.1	W48872	0	0	0	0	0	0	0	0	0	0	0	0	0	0	0	0	0	0	0	0
GCA_000560165.1	M45245	99.95	0	0	0	0	0	0	0	0	0	0	0	0	0	0	0	0	0	0	0
GCA_000560185.1	F90608	99.95	0	0	0	0	0	0	0	0	0	0	0	0	0	0	0	0	0	0	0
GCA_000560285.1	M64164	99.95	0	0	0	0	0	0	0	0	0	0	0	0	0	0	0	0	0	0	0
GCA_000560305.1	M67290	99.95	0	0	0	0	0	0	0	0	0	0	0	0	0	0	0	0	0	0	0
GCA_000560345.1	H75198	99.95	0	0	0	0	0	0	0	0	0	0	0	0	0	0	0	0	0	0	0
GCA_000560365.1	M64191	99.95	0	0	0	0	0	0	0	0	0	0	0	0	0	0	0	0	0	0	0
GCA_000560385.1	M70590	99.95	0	0	0	0	0	0	0	0	0	0	0	0	0	0	0	0	0	0	0
GCA_000560405.1	T34696	99.95	0	0	0	0	0	0	0	0	0	0	0	0	0	0	0	0	0	0	0
GCA_000560425.1	T34703	99.95	0	0	0	0	0	0	0	0	0	0	0	0	0	0	0	0	0	0	0
GCA_000560445.1	W21472	99.95	100	0	0	0	0	0	0	0	0	0	0	0	0	0	0	0	0	0	1
GCA_000560485.1	W24216	99.882	0	0	0	0	0	0	0	0	0	0	0	0	0	0	0	0	0	0	0
GCA_000560505.1	H81437	99.95	0	0	0	0	0	0	0	0	0	0	0	0	0	0	0	0	0	0	0
GCA_000560585.1	H84492	99.95	0	0	0	0	0	0	0	0	0	0	0	0	0	0	0	0	0	0	0
GCA_000560685.1	F43676	99.95	0	0	0	0	0	0	0	0	0	0	0	0	0	0	0	0	0	0	0
GCA_000560705.1	T47181	99.95	0	0	0	0	0	0	0	0	0	0	0	0	0	0	0	0	0	0	0
GCA_000560725.1	W33796	99.95	0	0	0	0	0	0	0	0	0	0	0	0	0	0	0	0	0	0	0
GCA_000560745.1	F46632	99.95	100	0	0	0	0	0	0	0	0	0	0	0	0	0	0	0	0	0	1
GCA_000560925.1	W42932	99.95	0	0	0	0	0	0	0	0	0	0	0	0	0	0	0	0	0	0	0
GCA_000561065.1	H21935	99.95	0	0	0	0	0	0	0	0	0	0	0	0	0	0	0	0	0	0	0
GCA_000561085.1	H21924	99.95	0	0	0	0	0	0	0	0	0	0	0	0	0	0	0	0	0	0	0
GCA_000561105.1	F59156	99.95	0	0	0	0	0	0	0	0	0	0	0	0	0	0	0	0	0	0	0
GCA_000561145.1	W48906	99.95	0	0	0	0	0	0	0	0	0	0	0	0	0	0	0	0	0	0	0
GCA_000561185.1	H24884	99.882	99.874	0	0	0	0	98.444	0	0	0	0	0	0	0	0	0	0	0	0	2
GCA_000561305.1	W51776	99.95	0	0	0	0	0	0	0	0	0	0	0	0	0	0	0	0	0	0	0
GCA_000561405.1	M24400	99.95	0	0	0	0	0	0	0	0	0	0	0	0	0	0	0	0	0	0	0
GCA_000561465.1	T71868	99.95	0	0	0	0	0	0	0	0	0	0	0	0	0	0	0	0	0	0	0
GCA_000561485.1	T71872	99.95	0	0	0	0	0	0	0	0	0	0	0	0	0	0	0	0	0	0	0
GCA_000561525.1	H33602	99.95	0	0	0	0	0	0	0	0	0	0	0	0	0	0	0	0	0	0	0
GCA_000561545.1	H33636	99.95	0	0	0	0	0	99.048	0	0	0	0	0	0	0	0	0	0	0	0	1
GCA_000561605.1	W60774	99.95	100	0	0	0	0	0	0	0	0	0	0	0	0	0	0	0	0	0	1
GCA_000561665.1	W60801	99.95	0	0	0	0	0	0	0	0	0	0	0	0	0	0	0	0	0	0	0
GCA_000561685.1	F74139	99.95	0	0	0	0	0	0	0	0	0	0	0	0	0	0	0	0	0	0	0
GCA_000561785.1	F76996	99.95	0	0	0	0	0	0	0	0	0	0	0	0	0	0	0	0	0	0	0
GCA_000561845.1	H42737	99.95	0	0	0	0	0	0	0	0	0	0	0	0	0	0	0	0	0	0	0
GCA_000561925.1	F80381	99.95	0	0	0	0	0	0	0	0	0	0	0	0	0	0	0	0	0	0	0
GCA_000562045.1	H45765	99.95	0	0	0	0	0	0	0	0	0	0	0	0	0	0	0	0	0	0	0
GCA_000562125.1	F83272	99.95	100	0	0	0	0	100	0	0	0	0	0	0	0	0	0	0	0	0	2
GCA_000562145.1	T87526	0	0	0	0	0	0	0	0	0	0	0	0	0	0	0	0	0	0	0	0
GCA_000562165.1	W73060	99.95	0	0	0	0	0	0	0	0	0	0	0	0	0	0	0	0	0	0	0
GCA_000562205.1	H48646	99.95	0	0	0	0	0	0	0	0	0	0	0	0	0	0	0	0	0	0	0
GCA_000562325.1	T12923	99.95	0	0	0	0	0	0	0	0	0	0	0	0	0	0	0	0	0	0	0
GCA_000562525.1	H71785	99.95	0	0	0	0	0	0	0	0	0	0	0	0	0	0	0	0	0	0	0
GCA_000562545.1	H71781	99.95	0	0	0	0	0	0	0	0	0	0	0	0	0	0	0	0	0	0	0
GCA_000562585.1	T45945	99.95	0	0	0	0	0	0	0	0	0	0	0	0	0	0	0	0	0	0	0
GCA_000562635.1	H23829	99.95	0	0	0	0	0	0	0	0	0	0	0	0	0	0	0	0	0	0	0
GCA_000562655.1	H23830	99.95	0	0	0	0	0	0	0	0	0	0	0	0	0	0	0	0	0	0	0
GCA_000562775.1	H37776	99.95	0	0	0	0	0	0	0	0	0	0	0	0	0	0	0	0	0	0	0
GCA_000562795.1	H37781	99.95	0	0	0	0	0	0	0	0	0	0	0	0	0	0	0	0	0	0	0
GCA_000562815.1	F77710	99.95	0	0	0	0	0	0	0	0	0	0	0	0	0	0	0	0	0	0	0
GCA_000562875.1	S39407	99.95	0	0	0	0	0	0	0	0	0	0	0	0	0	0	0	0	0	0	0
GCA_000562895.1	F81035	99.95	0	0	0	0	0	0	0	0	0	0	0	0	0	0	0	0	0	0	0
GCA_000562915.1	T12805	99.95	0	0	0	0	0	0	0	0	0	0	0	0	0	0	0	0	0	0	0
GCA_000562935.1	T12818	99.95	100	0	0	0	0	0	0	0	0	0	0	0	0	0	0	0	0	0	1
GCA_000562955.1	S39411	99.95	0	0	0	0	0	0	0	0	0	0	0	0	0	0	0	0	0	0	0
GCA_000562995.1	F19383	99.95	0	0	0	0	0	0	0	0	0	0	0	0	0	0	0	0	0	0	0
GCA_000563055.1	F26088	0	0	0	0	0	0	0	0	0	0	0	0	0	0	0	0	0	0	0	0
GCA_000563115.1	F63154	99.95	0	0	0	0	0	0	0	0	0	0	0	0	0	0	0	0	0	0	0
GCA_000563195.1	F74220	99.95	0	0	0	0	0	0	0	0	0	0	0	0	0	0	0	0	0	0	0
GCA_000563355.1	H31290	99.95	0	0	0	0	0	0	0	0	0	0	0	0	0	0	0	0	0	0	0
GCA_000563415.1	H40575	99.95	0	0	0	0	0	0	0	0	0	0	0	0	0	0	0	0	0	0	0
GCA_000563435.1	H40583	99.95	0	0	0	0	0	0	0	0	0	0	0	0	0	0	0	0	0	0	0
GCA_000563555.1	H64303	99.95	0	0	0	0	0	0	0	0	0	0	0	0	0	0	0	0	0	0	0
GCA_000563595.1	H70821	99.95	0	0	0	0	0	0	0	0	0	0	0	0	0	0	0	0	0	0	0
GCA_000563675.1	H77094	99.95	0	0	0	0	0	0	0	0	0	0	0	0	0	0	0	0	0	0	0
GCA_000563775.1	M31588	99.95	0	0	0	0	0	0	0	0	0	0	0	0	0	0	0	0	0	0	0
GCA_000563835.1	M65003	99.95	0	0	0	0	0	0	0	0	0	0	0	0	0	0	0	0	0	0	0
GCA_000563855.1	M68467	99.95	0	0	0	0	0	0	0	0	0	0	0	0	0	0	0	0	0	0	0
GCA_000563895.1	M71813	99.95	0	0	0	0	0	0	0	0	0	0	0	0	0	0	0	0	0	0	0
GCA_000563915.1	M74952	99.95	0	0	0	0	0	0	0	0	0	0	0	0	0	0	0	0	0	0	0
GCA_000563935.1	T26751	99.95	0	0	0	0	0	0	0	0	0	0	0	0	0	0	0	0	0	0	0
GCA_000563955.1	T30033	99.95	0	0	0	0	0	0	0	0	0	0	0	0	0	0	0	0	0	0	0
GCA_000563995.1	T33147	99.95	0	0	0	0	0	0	0	0	0	0	0	0	0	0	0	0	0	0	0
GCA_000564015.1	T39328	99.95	0	0	0	0	0	0	0	0	0	0	0	0	0	0	0	0	0	0	0
GCA_000564075.1	T62346	99.95	0	0	0	0	0	0	0	0	0	0	0	0	0	0	0	0	0	0	0
GCA_000564135.1	T69716	99.95	0	0	0	0	0	0	0	0	0	0	0	0	0	0	0	0	0	0	0
GCA_000564255.1	T76030	99.95	0	0	0	0	0	0	0	0	0	0	0	0	0	0	0	0	0	0	0
GCA_000564405.1	W12628	99.95	0	0	0	0	0	0	0	0	0	0	0	0	0	0	0	0	0	0	0
GCA_000564425.1	W15997	0	0	0	0	0	0	0	0	0	0	0	0	0	0	0	0	0	0	0	0
GCA_000564755.1	W85440	99.95	0	0	0	0	0	0	0	0	0	0	0	0	0	0	0	0	0	0	0
GCA_000564795.1	W88555	99.95	0	0	0	0	0	0	0	0	0	0	0	0	0	0	0	0	0	0	0
GCA_000569155.1	W50092	99.882	100	0	0	0	0	98.978	0	0	0	0	0	0	0	0	0	0	0	0	2
GCA_000569175.1	W46883	99.882	99.874	0	0	0	0	98.978	0	0	0	0	0	0	0	0	0	0	0	0	2
GCA_000569195.1	W36570	99.882	99.874	0	0	0	0	98.978	0	0	0	0	0	0	0	0	0	0	0	0	2
GCA_000569215.1	W36553	99.882	99.874	0	0	0	0	98.374	0	0	0	0	0	0	0	0	0	0	0	0	2
GCA_000569235.1	W33592	99.95	100	0	0	0	0	100	0	0	0	0	0	0	0	0	0	0	0	0	2
GCA_000569255.1	W33578	99.882	99.874	0	0	0	0	98.978	0	0	0	0	0	0	0	0	0	0	0	0	2
GCA_000569315.1	W23225	99.882	99.874	0	0	0	0	98.978	0	0	0	0	0	0	0	0	0	0	0	0	2
GCA_000569355.1	W23207	99.882	99.874	0	0	0	0	98.978	0	0	0	0	0	0	0	0	0	0	0	0	2
GCA_000569435.1	T57415	99.882	0	0	0	0	0	0	0	0	0	0	0	0	0	0	0	0	0	0	0
GCA_000569475.1	T54294	99.882	99.874	0	0	0	0	98.978	0	0	0	0	0	0	100	0	0	0	0	0	3
GCA_000569495.1	T54280	99.882	99.874	0	0	0	0	98.978	0	0	0	0	0	0	0	0	0	0	0	0	2
GCA_000569515.1	T51022	99.882	0	0	0	0	0	0	0	0	0	0	0	0	0	0	0	0	0	0	0
GCA_000569595.1	T44811	99.882	99.874	0	0	0	0	98.978	0	0	0	0	0	0	0	0	0	0	0	0	2
GCA_000569715.1	M91141	99.95	0	0	0	0	0	0	0	0	0	0	0	0	0	0	0	0	0	0	0
GCA_000569815.1	M77229	99.882	100	0	0	0	0	0	0	0	0	0	0	0	0	0	0	0	0	0	1
GCA_000569835.1	M77225	99.882	99.874	0	0	0	0	98.978	0	0	0	0	0	0	0	0	0	0	0	0	2
GCA_000569855.1	M77210	99.95	0	0	0	0	0	0	0	0	0	0	0	0	0	0	0	0	0	0	0
GCA_000569875.1	M20198	99.764	99.874	0	0	0	0	98.978	0	0	0	0	0	0	0	0	0	0	0	0	2
GCA_000569895.1	M20180	99.882	99.874	0	0	0	0	98.978	0	0	0	0	0	0	0	0	0	0	0	0	2
GCA_000569975.1	H91384	0	0	0	0	0	0	0	0	0	0	0	0	0	0	0	0	0	0	0	0
GCA_000570115.1	H12930	99.95	0	0	0	0	0	0	0	0	0	0	0	0	0	0	0	0	0	0	0
GCA_000570335.1	F36699	99.882	99.874	0	0	0	0	98.978	0	0	0	0	0	0	0	0	0	0	0	0	2
GCA_000570415.1	W81816	99.882	0	0	0	0	0	0	0	0	0	0	0	0	0	0	0	0	0	0	0
GCA_000570515.1	W64958	99.882	99.874	0	0	0	0	98.978	0	0	0	0	0	0	0	0	0	0	0	0	2
GCA_000570575.1	T92889	99.882	99.874	0	0	0	0	98.978	0	0	0	0	0	0	100	0	0	0	0	0	3
GCA_000570675.1	T34036	99.882	99.874	0	0	0	0	98.978	0	0	0	0	0	0	0	0	0	0	0	0	2
GCA_000570715.1	T30565	99.882	99.874	0	0	0	0	98.978	0	0	0	0	0	0	0	0	0	0	0	0	2
GCA_000570755.1	T20142	99.95	0	0	0	0	0	0	0	0	0	0	0	0	0	0	0	0	0	0	0
GCA_000570855.1	T16669	99.882	99.874	0	0	0	0	98.978	0	0	0	0	0	0	0	0	0	0	0	0	2
GCA_000570875.1	T16664	99.882	99.874	0	0	0	0	98.978	0	0	0	0	0	0	0	0	0	0	0	0	2
GCA_000570895.1	S56450	99.882	99.874	0	0	0	0	98.978	0	0	0	0	0	0	0	0	0	0	0	0	2
GCA_000570915.1	M73703	99.882	99.874	0	0	0	0	98.909	0	0	0	0	0	0	0	0	0	0	0	0	2
GCA_000570935.1	M73702	99.882	99.874	0	0	0	0	98.978	0	0	0	0	0	0	0	0	0	0	0	0	2
GCA_000570975.1	M70073	99.882	99.874	0	0	0	0	98.978	0	0	0	0	0	0	0	0	0	0	0	0	2
GCA_000571015.1	M66661	99.882	99.874	0	0	0	0	98.978	0	0	0	0	0	0	0	0	0	0	0	0	2
GCA_000571055.1	M56985	99.882	99.874	0	0	0	0	98.978	0	0	0	0	0	0	0	0	0	0	0	0	2
GCA_000571075.1	M53327	99.882	99.874	0	0	0	0	98.978	0	0	0	0	0	0	0	0	0	0	0	0	2
GCA_000571095.1	M46077	99.882	99.874	0	0	0	0	98.978	0	0	0	0	0	0	0	0	0	0	0	0	2
GCA_000571175.1	H71553	99.882	99.874	0	0	0	0	98.978	0	0	0	0	0	0	0	0	0	0	0	0	2
GCA_000571195.1	H71538	99.882	99.748	0	0	0	0	99.184	0	0	0	0	0	0	0	0	0	0	0	0	2
GCA_000571355.1	H58183	99.882	99.874	0	0	0	0	98.978	0	0	0	0	0	0	0	0	0	0	0	0	2
GCA_000571375.1	H58165	99.882	99.874	0	0	0	0	98.978	0	0	0	0	0	0	0	0	0	0	0	0	2
GCA_000571395.1	H47671	99.882	99.748	0	0	0	0	98.978	0	0	0	0	0	0	0	0	0	0	0	0	2
GCA_000571435.1	F88387	99.882	99.874	0	0	0	0	98.978	0	0	0	0	0	0	0	0	0	0	0	0	2
GCA_000571555.1	F81381	99.764	99.874	0	0	0	0	98.978	0	0	0	0	0	0	0	0	0	0	0	0	2
GCA_000571735.1	F26884	99.882	99.874	0	0	0	0	98.978	0	0	0	0	0	0	0	0	0	0	0	0	2
GCA_000571755.1	F26858	98.109	99.874	0	0	0	0	98.978	0	0	0	0	0	0	0	0	0	0	0	0	2
GCA_000571855.1	F16432	99.882	99.874	0	0	0	0	98.978	0	0	0	0	0	0	0	0	0	0	0	0	2
GCA_000572325.1	HBHO6021	99.882	0	0	0	0	0	0	0	0	0	0	0	0	100	0	0	0	0	0	1
GCA_000572345.1	WMCA6126	99.882	99.874	0	0	0	0	98.978	0	0	0	0	0	0	0	0	0	0	0	0	2
GCA_000572365.1	WAMC6055	99.882	0	0	0	0	0	0	0	0	0	0	0	0	0	0	0	0	0	0	0
GCA_000572385.1	WMCS6115	99.882	99.874	0	0	0	0	98.978	0	0	0	0	0	0	0	0	0	0	0	0	2
GCA_000572465.1	WMCA6086	99.882	99.874	0	0	0	0	98.978	0	0	0	0	0	0	0	0	0	0	0	0	2
GCA_000572505.1	FVRH6079	99.882	99.874	0	0	0	0	98.978	0	0	0	0	0	0	0	0	0	0	0	0	2
GCA_000572525.1	FVRH6066	99.882	0	0	0	0	0	99.184	0	0	0	0	0	0	0	0	0	0	0	0	1
GCA_000572565.1	FVRH6040	99.882	99.874	0	0	0	0	99.176	0	0	0	0	0	0	0	0	0	0	0	0	2
GCA_000572585.1	MISS6131	99.882	99.874	0	0	0	0	98.978	0	0	0	0	0	0	0	0	0	0	0	0	2
GCA_000572645.1	SJOS6145	99.882	99.874	0	0	0	0	99.048	0	0	0	0	0	0	0	0	0	0	0	0	2
GCA_000572745.1	SMMC6014	99.882	0	0	0	0	0	0	0	0	0	0	0	0	0	0	0	0	0	0	0
GCA_000572805.1	WAMC6049	99.95	0	0	0	0	0	0	0	0	0	0	0	0	0	0	0	0	0	0	0
GCA_000572825.1	SMMC6016	99.882	99.874	0	0	0	0	98.978	0	0	0	0	0	0	0	0	0	0	0	0	2
GCA_000572865.1	LPIH6008	97.991	100	0	0	0	0	0	0	0	0	0	0	0	0	0	0	0	0	0	1
GCA_000572885.1	LPIH6004	99.882	99.874	0	0	0	0	98.978	0	0	0	0	0	0	0	0	0	0	0	0	2
GCA_000572905.1	HBHO6050	99.9	99.874	0	0	0	0	0	0	0	0	0	0	0	0	0	0	0	0	0	1
GCA_000572985.1	SCOA6009	99.882	99.874	0	0	0	0	98.978	0	0	0	0	0	0	99.924	0	0	0	0	0	3
GCA_000573005.1	SJUD6085	99.882	0	0	0	0	0	0	0	0	0	0	0	0	0	0	0	0	0	0	0
GCA_000573025.1	COAS6044	99.882	0	0	0	0	0	0	0	0	0	0	0	0	0	0	0	0	0	0	0
GCA_000573065.1	LPIH6010	99.882	99.874	0	0	0	0	98.978	0	0	0	0	0	0	0	0	0	0	0	0	2
GCA_000576755.1	F41902	99.882	100	0	0	0	0	0	0	0	0	0	0	0	0	0	0	0	0	0	1
GCA_000576855.1	M36089	99.95	100	0	0	0	0	98.954	0	0	0	0	0	0	0	0	0	0	0	0	2
GCA_000576905.1	T45940	99.95	99.874	0	0	0	0	98.978	0	0	0	0	0	0	0	0	0	0	0	0	2
GCA_000576985.1	M44986	99.882	99.874	0	0	0	0	98.978	0	0	0	0	0	0	0	0	0	0	0	0	2
GCA_000577005.1	M44987	99.882	99.874	0	0	0	0	98.978	0	0	0	0	0	0	0	0	0	0	0	0	2
GCA_000577025.1	F77709	99.882	99.874	0	0	0	0	98.909	0	0	0	0	0	0	0	0	0	0	0	0	2
GCA_000577045.1	F74035	99.882	0	0	0	0	0	98.978	0	0	0	0	0	0	0	0	0	0	0	0	1
GCA_000577065.1	F74039	99.882	0	0	0	0	0	98.978	0	0	0	0	0	0	0	0	0	0	0	0	1
GCA_000577125.1	F31094	99.882	99.874	0	0	0	0	98.978	0	0	0	0	0	0	0	0	0	0	0	0	2
GCA_000577145.1	F46780	99.95	99.874	0	0	0	0	0	0	0	0	0	0	0	0	0	0	0	0	0	1
GCA_000577175.1	F46785	99.882	100	0	0	0	0	99.184	0	0	0	0	0	0	0	0	0	0	0	0	2
GCA_000577215.1	F50093	99.882	0	0	0	0	0	98.978	0	0	0	0	0	0	0	0	0	0	0	0	1
GCA_000577435.1	H16097	99.95	99.874	0	0	0	0	0	0	0	0	0	0	0	0	0	0	0	0	0	1
GCA_000577475.1	H25869	99.882	99.874	0	0	0	0	98.978	0	0	0	0	0	0	0	0	0	0	0	0	2
GCA_000577565.1	T67319	99.882	99.748	0	0	0	0	99.184	0	0	0	0	0	0	0	0	0	0	0	0	2
GCA_000577625.1	W29625	99.882	99.874	0	0	0	0	98.978	0	0	0	0	0	0	0	0	0	0	0	0	2
GCA_000577735.1	W50110	99.95	99.874	0	0	0	0	99.033	0	0	0	0	0	0	0	0	0	0	0	0	2
GCA_000577835.1	W46839	99.882	99.874	0	0	0	0	98.978	0	0	0	0	0	0	0	0	0	0	0	0	2
GCA_000577915.1	F60357	99.882	99.874	0	0	0	0	98.978	0	0	0	0	0	0	0	0	0	0	0	0	2
GCA_000577975.1	F60360	99.882	99.874	0	0	0	0	98.978	0	0	0	0	0	0	0	0	0	0	0	0	2
GCA_000578015.1	F63750	99.882	99.874	0	0	0	0	98.978	0	0	0	0	0	0	0	0	0	0	0	0	2
GCA_000578035.1	F63687	99.882	99.874	0	0	0	0	98.978	0	0	0	0	0	0	0	0	0	0	0	0	2
GCA_000578075.1	M28487	99.882	99.874	0	0	0	0	98.978	0	0	0	0	0	0	0	0	0	0	0	0	2
GCA_000578095.1	M29068	99.882	99.874	0	0	0	0	98.978	0	0	0	0	0	0	0	0	0	0	0	0	2
GCA_000578195.1	H32166	99.882	99.874	0	0	0	0	98.978	0	0	0	0	0	0	0	0	0	0	0	0	2
GCA_000578215.1	H32181	99.882	99.874	0	0	0	0	98.978	0	0	0	0	0	0	0	0	0	0	0	0	2
GCA_000578235.1	F63786	99.882	99.748	0	0	0	0	98.978	0	0	0	0	0	0	0	0	0	0	0	0	2
GCA_000578255.1	F66778	99.882	99.748	0	0	0	0	98.978	0	0	0	0	0	0	0	0	0	0	0	0	2
GCA_000578275.1	M32679	99.95	0	0	0	0	0	0	0	0	0	0	0	0	0	0	0	0	0	0	0
GCA_000578315.1	T77618	99.882	99.874	0	0	0	0	98.978	0	0	0	0	0	0	0	0	0	0	0	0	2
GCA_000578435.1	W62972	99.882	0	0	0	0	0	98.444	0	0	0	0	0	0	0	0	0	0	0	0	1
GCA_000578515.1	F73229	99.95	0	0	0	0	0	0	0	0	0	0	0	0	0	0	0	0	0	0	0
GCA_000578555.1	M39265	99.95	0	0	0	0	0	0	0	0	0	0	0	0	0	0	0	0	0	0	0
GCA_000578595.1	W65910	99.882	99.874	0	0	0	0	98.978	0	0	0	0	0	0	0	0	0	0	0	0	2
GCA_000578615.1	W65904	99.882	99.874	0	0	0	0	98.978	0	0	0	0	0	0	0	0	0	0	0	0	2
GCA_000578635.1	H41079	99.882	99.874	0	0	0	0	98.978	0	0	0	0	0	0	0	0	0	0	0	0	2
GCA_000578755.1	H43986	99.882	99.748	0	0	0	0	99.184	0	0	0	0	0	0	0	0	0	0	0	0	2
GCA_000578775.1	H44015	99.882	99.874	0	0	0	0	98.841	0	0	0	0	0	0	0	0	0	0	0	0	2
GCA_000578815.1	T89906	99.882	99.874	0	0	0	0	98.978	0	0	0	0	0	0	0	0	0	0	0	0	2
GCA_000578855.1	W70590	99.882	99.874	0	0	0	0	98.978	0	0	0	0	0	0	0	0	0	0	0	0	2
GCA_000578935.1	M42514	99.882	99.874	0	0	0	0	98.978	0	0	0	0	0	0	0	0	0	0	0	0	2
GCA_000578995.1	F82568	99.882	0	0	0	0	0	0	0	0	0	0	0	0	0	0	0	0	0	0	0
GCA_000579055.1	M49455	99.882	99.874	0	0	0	0	98.978	0	0	0	0	0	0	0	0	0	0	0	0	2
GCA_000579095.1	M49474	0	0	0	0	0	0	0	0	0	0	0	0	0	0	0	0	0	0	0	0
GCA_000579155.1	H49922	99.882	99.874	0	0	0	0	98.978	0	0	0	0	0	0	0	0	0	0	0	0	2
GCA_000579235.1	F26021	99.764	99.874	0	0	0	0	98.978	0	0	0	0	0	0	0	0	0	0	0	0	2
GCA_000579315.1	F85711	99.882	0	0	0	0	0	0	0	0	0	0	0	0	0	0	0	0	0	0	0
GCA_000579335.1	F89053	99.95	100	0	0	0	0	0	0	0	0	0	0	0	0	0	0	0	0	0	1
GCA_000579375.1	F89078	99.882	99.874	0	0	0	0	98.978	0	0	0	0	0	0	0	0	0	0	0	0	2
GCA_000579395.1	F92047	99.882	99.874	0	0	0	0	98.978	0	0	0	0	0	0	0	0	0	0	0	0	2
GCA_000579435.1	F92119_080312	99.882	99.874	0	0	0	0	98.978	0	0	0	0	0	0	0	0	0	0	0	0	2
GCA_000579455.1	H49831	99.882	99.874	0	0	0	0	98.978	0	0	0	0	0	0	0	0	0	0	0	0	2
GCA_000579515.1	H56219	99.882	99.874	0	0	0	0	98.978	0	0	0	0	0	0	0	97.358	0	0	0	0	3
GCA_000579535.1	H56227	99.882	100	0	0	0	0	98.841	0	0	0	0	0	0	0	0	0	0	0	0	2
GCA_000579555.1	H59298	99.882	99.874	0	0	0	0	98.978	0	0	0	0	0	0	0	0	0	0	0	0	2
GCA_000579575.1	H65794	99.882	99.874	0	0	0	0	98.978	0	0	0	0	0	0	0	0	0	0	0	0	2
GCA_000579595.1	H75423	99.882	99.874	0	0	0	0	98.978	0	0	0	0	0	0	0	0	0	0	0	0	2
GCA_000579615.1	H75425	99.882	99.874	0	0	0	0	98.978	0	0	0	0	0	0	0	0	0	0	0	0	2
GCA_000579655.1	M55878	99.882	0	0	0	0	0	0	0	0	0	0	0	0	0	0	0	0	0	0	0
GCA_000579695.1	M55902	99.882	0	0	0	0	0	0	0	0	0	0	0	0	0	0	0	0	0	0	0
GCA_000579715.1	M59248	99.882	99.874	0	0	0	0	98.978	0	0	0	0	0	0	0	0	0	0	0	0	2
GCA_000579755.1	M59257	99.882	99.874	0	0	0	0	98.978	0	0	0	0	0	0	0	0	0	0	0	0	2
GCA_000579875.1	T28640	99.882	99.874	0	0	0	0	98.978	0	0	0	0	0	0	0	0	0	0	0	0	2
GCA_000579915.1	T36111	0	0	0	0	0	0	0	0	0	0	0	0	0	0	0	0	0	0	0	0
GCA_000579935.1	T39093	99.882	99.874	0	0	0	0	98.978	0	0	0	0	0	0	0	0	0	0	0	0	2
GCA_000579955.1	W15951	99.882	99.874	0	0	0	0	98.978	0	0	0	0	0	0	0	0	0	0	0	0	2
GCA_000580015.1	W76930	99.882	99.874	0	0	0	0	98.978	0	0	0	0	0	0	0	0	0	0	0	0	2
GCA_000580035.1	W76994_072512	99.882	0	0	0	0	0	0	0	0	0	0	0	0	0	0	0	0	0	0	0
GCA_000580055.1	W79968	99.882	99.874	0	0	0	0	98.978	0	0	0	0	0	0	0	0	0	0	0	0	2
GCA_000586815.1	W28921	99.882	99.874	0	0	0	0	98.978	0	0	0	0	0	0	0	0	0	0	0	0	2
GCA_000586975.1	W12583	99.882	99.874	0	0	0	0	98.978	0	100	100	0	0	0	100	0	0	0	0	0	5
GCA_000586995.1	W12582	99.882	99.874	0	0	0	0	98.978	0	0	0	0	0	0	100	0	0	0	0	0	3
GCA_000587015.1	T62976	99.882	0	0	0	0	0	0	0	0	0	0	0	0	0	0	0	0	0	0	0
GCA_000587075.1	T35622	99.882	99.874	0	0	0	0	98.978	0	0	0	0	0	0	0	0	0	0	0	0	2
GCA_000587095.1	T32086	99.882	0	0	0	0	0	98.978	0	0	0	0	0	0	0	0	0	0	0	0	1
GCA_000587135.1	M86943	99.882	99.874	0	0	0	0	98.978	0	0	0	0	0	0	0	0	0	0	0	0	2
GCA_000587155.1	M86940	99.882	99.874	0	0	0	0	98.978	0	0	0	0	0	0	0	0	0	0	0	0	2
GCA_000587175.1	M79686	99.95	100	0	0	0	0	99.177	0	0	0	0	0	0	0	0	0	0	0	0	2
GCA_000587255.1	M72097	99.882	0	0	0	0	0	0	0	0	0	0	0	0	0	0	0	0	0	0	0
GCA_000587275.1	M70018	99.882	99.874	0	0	0	0	98.978	0	0	0	0	0	0	0	0	0	0	0	0	2
GCA_000587295.1	M70017	99.882	99.874	0	0	0	0	98.978	0	0	0	0	0	0	0	0	0	0	0	0	2
GCA_000587315.1	M67938	99.882	99.874	0	0	0	0	98.978	0	0	0	0	0	0	0	0	0	0	0	0	2
GCA_000587395.1	H84959	99.882	0	0	0	0	0	98.978	0	0	0	0	0	0	0	0	0	0	0	0	1
GCA_000587415.1	H75421	99.882	99.874	0	0	0	0	98.978	0	0	0	0	0	0	0	0	0	0	0	0	2
GCA_000587455.1	H68996	99.882	99.874	0	0	0	0	98.978	0	0	0	0	0	0	0	0	0	0	0	0	2
GCA_000587535.1	H65878	99.882	99.874	0	0	0	0	98.909	0	0	0	0	0	0	0	0	0	0	0	0	2
GCA_000587575.1	H31086	99.882	0	0	0	0	0	98.978	0	0	0	0	0	0	0	0	0	0	0	0	1
GCA_000587595.1	H31084	99.882	0	0	0	0	0	98.978	0	0	0	0	0	0	0	0	0	0	0	0	1
GCA_000587615.1	H22656	99.882	99.874	0	0	0	0	98.978	0	0	0	0	0	0	0	0	0	0	0	0	2
GCA_000587635.1	F64896	99.882	99.874	0	0	0	0	98.978	0	0	0	0	0	0	0	0	0	0	0	0	2
GCA_000587715.1	F36090	99.882	99.874	0	0	0	0	98.909	0	0	0	0	0	0	0	0	0	0	0	0	2
GCA_000587735.1	F27252	99.882	99.874	0	0	0	0	98.909	0	0	0	0	0	0	0	0	0	0	0	0	2
GCA_000587775.1	F26032	99.882	99.874	0	0	0	0	99.048	0	0	0	0	0	0	0	0	0	0	0	0	2
GCA_000604525.1	F63712	99.95	99.748	0	0	0	0	0	0	0	0	0	0	0	0	0	0	0	0	0	1
GCA_000604665.1	H72119	99.882	99.874	0	0	0	0	99.03	0	0	0	0	0	0	0	0	0	0	0	0	2
GCA_000604705.1	T28653	99.882	100	0	0	0	0	98.978	0	0	0	0	0	0	0	0	0	0	0	0	2
GCA_000604725.1	T35615	99.95	99.865	0	0	0	0	0	0	0	0	0	0	0	0	0	0	0	0	0	1
GCA_000604885.1	F48950	99.882	99.874	0	0	0	0	98.978	0	0	0	0	0	0	0	0	0	0	0	0	2
GCA_000604945.1	F80972	99.95	100	0	0	0	0	0	0	0	0	0	0	0	0	0	0	0	0	0	1
GCA_000604965.1	H12662	99.882	99.874	0	0	0	0	98.978	0	0	0	0	0	0	0	0	0	0	0	0	2
GCA_000605045.1	H22637	99.882	99.874	0	0	0	0	98.978	0	0	0	0	0	0	99.928	0	0	0	0	0	3
GCA_000605185.1	H88170	99.882	99.874	0	0	0	0	98.841	0	0	0	0	0	0	0	0	0	0	0	0	2
GCA_000605225.1	M13099	99.95	0	0	0	0	0	99.184	0	0	0	0	0	0	0	0	0	0	0	0	1
GCA_000605285.1	M24416	99.882	99.874	0	0	0	0	98.978	0	0	0	0	0	0	0	0	0	0	0	0	2
GCA_000605305.1	M24418	99.882	99.874	0	0	0	0	98.978	0	0	0	0	0	0	0	0	0	0	0	0	2
GCA_000605525.1	T13128	99.882	99.874	0	0	0	0	98.978	0	0	0	0	0	0	0	0	0	0	0	0	2
GCA_000605545.1	T42547	99.882	99.874	0	0	0	0	98.978	0	0	0	0	0	0	0	0	0	0	0	0	2
GCA_000605585.1	T45839	99.882	0	0	0	0	0	0	0	0	0	0	0	0	0	0	0	0	0	0	0
GCA_000605645.1	T52642	99.882	99.874	0	0	0	0	98.978	0	0	0	0	0	0	0	0	0	0	0	0	2
GCA_000605665.1	T52649	99.95	100	0	0	0	0	0	0	0	0	0	0	0	0	0	0	0	0	0	1
GCA_000605685.1	T55950	99.882	99.874	0	0	0	0	98.978	0	0	0	0	0	0	0	0	0	0	0	0	2
GCA_000605745.1	T66622	99.95	0	0	0	0	0	0	0	0	0	0	0	0	0	0	0	0	0	0	0
GCA_000605765.1	T66632	99.882	99.874	0	0	0	0	98.978	0	0	0	0	0	0	0	0	0	0	0	0	2
GCA_000605785.1	T70161	99.95	0	0	0	0	0	0	0	0	0	0	0	0	0	0	0	0	0	0	0
GCA_000605805.1	T83543	0	0	0	0	0	0	0	0	0	0	0	0	0	0	0	0	0	0	0	0
GCA_000605825.1	T83563	99.882	99.748	0	0	0	0	98.978	0	0	0	0	0	0	0	0	0	0	0	0	2
GCA_000605845.1	T86825	99.882	99.874	0	0	0	0	98.978	0	0	0	0	0	0	0	0	0	0	0	0	2
GCA_000605965.1	W42255	99.882	99.874	0	0	0	0	98.978	0	0	0	0	0	0	0	0	0	0	0	0	2
GCA_000606025.1	W45750	99.882	99.874	0	0	0	0	98.978	0	0	0	0	0	0	0	0	0	0	0	0	2
GCA_000606065.1	W55536	99.764	99.874	0	0	0	0	98.978	0	0	0	0	0	0	0	0	0	0	0	0	2
GCA_000606125.1	F16533	99.882	99.874	0	0	0	0	98.978	0	0	0	0	0	0	0	0	0	0	0	0	2
GCA_000606205.1	F38211	99.882	99.874	0	0	0	0	98.978	0	0	0	0	0	0	0	0	0	0	0	0	2
GCA_000606225.1	F48420	99.882	99.874	0	0	0	0	98.978	0	0	0	0	0	0	0	0	0	0	0	0	2
GCA_000606245.1	F48422	99.882	99.874	0	0	0	0	98.978	0	0	0	0	0	0	0	0	0	0	0	0	2
GCA_000606305.1	F76253	99.882	0	0	0	0	0	0	0	0	0	0	0	0	0	0	0	0	0	0	0
GCA_000606325.1	F92121	99.882	99.874	0	0	0	0	98.978	0	0	0	0	0	0	0	0	0	0	0	0	2
GCA_000606385.1	H32175	99.882	99.874	0	0	0	0	98.978	0	0	0	0	0	0	0	0	0	0	0	0	2
GCA_000606405.1	H50387	99.882	99.874	0	0	0	0	98.978	0	0	0	0	0	0	0	0	0	0	0	0	2
GCA_000606425.1	H50403	99.882	99.874	0	0	0	0	98.841	0	0	0	0	0	0	0	0	0	0	0	0	2
GCA_000606445.1	H59325	99.882	99.874	0	0	0	0	98.978	0	0	0	0	0	0	0	0	0	0	0	0	2
GCA_000606465.1	H64570	99.95	0	0	0	0	0	0	0	0	0	0	0	0	0	0	0	0	0	0	0
GCA_000606685.1	M67953	99.882	99.874	0	0	0	0	98.978	0	0	0	0	0	0	0	0	0	0	0	0	2
GCA_000606705.1	M72095_021113	99.882	0	0	0	0	0	0	0	0	0	0	0	0	0	0	0	0	0	0	0
GCA_000606805.1	T31892	99.882	99.874	0	0	0	0	98.978	0	0	0	0	0	0	0	0	0	0	0	0	2
GCA_000606825.1	T59813	99.882	99.874	0	0	0	0	98.909	0	0	0	0	0	0	0	0	0	0	0	0	2
GCA_000606885.1	W27852	99.882	99.874	0	0	0	0	98.978	0	0	0	0	0	0	0	0	0	0	0	0	2
GCA_000607005.1	W45421	99.95	0	0	0	0	0	0	0	0	0	0	0	0	0	0	0	0	0	0	0
GCA_000607045.1	W75262	99.95	0	0	0	0	0	0	0	0	0	0	0	0	0	0	0	0	0	0	0
GCA_000607065.1	W76995	99.882	0	0	0	0	0	0	0	0	0	0	0	0	0	0	0	0	0	0	0
GCA_001642105.1	CU072914	99.882	99.874	0	0	0	0	98.978	0	0	0	0	0	0	0	0	0	0	0	0	2
GCA_002303825.1	BD12072	97.991	0	0	0	0	0	0	0	0	0	0	0	0	0	0	0	0	0	0	0
GCA_002303835.1	BD11451	99.882	99.874	0	0	0	0	99.048	0	0	0	0	0	0	0	0	0	0	0	0	2
GCA_000177995.1	A9754	99.882	99.874	0	0	0	0	98.978	0	0	0	0	0	0	97.604	0	0	0	0	0	3
GCA_000193855.2	CGS01	99.882	99.874	0	0	0	0	98.978	0	0	0	0	0	0	0	0	0	0	0	0	2
GCA_000247255.2	IS-24	99.764	99.874	0	0	0	0	98.909	0	0	0	0	0	0	0	0	0	0	0	0	2
GCA_000247335.2	IS-91	99.882	99.874	0	0	0	0	98.909	0	0	0	0	0	0	0	0	0	0	0	0	2
GCA_000247355.2	IS-88	99.882	99.874	0	0	0	0	98.909	0	0	0	0	0	0	0	0	0	0	0	0	2
GCA_000247395.2	IS-111	99.882	99.874	0	0	0	0	98.909	0	0	0	0	0	0	0	0	0	0	0	0	2
GCA_000258475.1	CO-23	99.882	99.874	0	0	0	0	98.909	0	0	0	0	0	0	0	0	0	0	0	0	2
GCA_000359665.1	HI010B	99.882	99.874	0	0	0	0	98.978	0	0	0	0	0	0	0	0	0	0	0	0	2
GCA_000536475.1	GGMC6057	99.882	99.874	0	0	0	0	98.978	0	0	0	0	0	0	0	0	0	0	0	0	2
GCA_000536515.1	PLAC6058	99.882	99.874	0	0	0	0	98.909	0	0	0	0	0	0	0	0	0	0	0	0	2
GCA_000536535.1	WAMC6081	99.882	99.874	0	0	0	0	0	0	0	0	0	0	0	0	0	0	0	0	0	1
GCA_000536555.1	UCIM6146	99.882	99.874	0	0	0	0	98.978	0	0	0	0	0	0	99.792	0	100	0	99.983	0	3
GCA_000536575.1	KINW6062	99.882	0	0	0	0	0	98.978	0	0	0	0	0	0	0	0	0	0	0	0	1
GCA_000536595.1	KINW6061	99.882	99.874	0	0	0	0	98.978	0	0	0	0	0	0	0	0	0	0	0	0	2
GCA_000536615.1	WMCA6123	99.882	100	0	0	0	0	98.909	0	0	0	0	0	0	0	0	0	0	0	0	2
GCA_000536635.1	FVRH6138	99.95	0	0	0	0	0	0	0	0	0	0	0	0	0	0	0	0	0	0	0
GCA_000536655.1	WMCA6100	99.882	99.874	0	0	0	0	98.978	0	0	0	0	0	0	0	0	0	0	0	0	2
GCA_000536755.1	WMCA6091	99.882	99.748	0	0	0	0	98.978	0	0	0	0	0	0	0	0	0	0	0	0	2
GCA_000536775.1	UCIM6134	99.882	99.874	0	0	0	0	98.978	0	0	0	0	0	0	0	0	0	0	0	0	2
GCA_000536795.1	WAMC6108	99.882	99.874	0	0	0	0	98.909	0	0	0	0	0	0	0	0	0	0	0	0	2
GCA_000536815.1	UCIM6126	99.882	99.874	0	0	0	0	98.978	0	0	0	0	0	0	0	0	0	0	0	0	2
GCA_000536855.1	WMCA6084	99.882	99.874	0	0	0	0	98.978	0	0	0	0	0	0	0	0	0	0	0	0	2
GCA_000536875.1	COAS6095	99.882	0	0	0	0	0	98.978	0	0	0	0	0	0	0	0	0	0	0	0	1
GCA_000596725.1	W60060	99.882	99.874	0	0	0	0	98.978	0	0	0	0	0	0	0	0	0	0	0	0	2
GCA_000596745.1	H35283	99.95	100	0	0	0	0	0	0	0	0	0	0	0	0	0	0	0	0	0	1
GCA_000596785.1	W57390	99.882	99.874	0	0	0	0	98.978	0	0	0	0	0	0	0	0	0	0	0	0	2
GCA_000596805.1	W62934	99.882	99.874	0	0	0	0	98.978	0	0	0	0	0	0	0	0	0	0	0	0	2
GCA_000596885.1	W65865	99.882	99.874	0	0	0	0	98.978	0	0	0	0	0	0	0	0	0	0	0	0	2
GCA_000596905.1	H41070	99.882	99.874	0	0	0	0	98.978	0	0	0	0	0	0	0	0	0	0	0	0	2
GCA_000596925.1	H41109	99.882	99.874	0	0	0	0	98.978	0	0	0	0	0	0	0	97.358	0	0	0	0	3
GCA_000596945.1	F76239	99.882	99.874	0	0	0	0	98.978	0	0	0	0	0	0	0	0	0	0	0	0	2
GCA_000596965.1	H43996	99.882	99.874	0	0	0	0	98.978	0	0	0	0	0	0	0	0	0	0	0	0	2
GCA_000596985.1	W70659	99.95	100	0	0	0	0	0	0	0	0	0	0	0	0	0	0	0	0	0	1
GCA_000597005.1	H47169	99.882	100	0	0	0	0	98.978	0	0	0	0	0	0	0	0	0	0	0	0	2
GCA_000597065.1	F85184	99.882	100	0	0	0	0	98.978	0	0	0	0	0	0	0	0	0	0	0	0	2
GCA_000597105.1	F89046	99.882	99.874	0	0	0	0	98.978	0	0	0	0	0	0	0	0	0	0	0	0	2
GCA_000597125.1	F89062	99.95	0	0	0	0	0	0	0	0	0	0	0	0	0	0	0	0	0	0	0
GCA_000597145.1	F89073	99.882	99.874	0	0	0	0	98.978	0	0	0	0	0	0	0	0	0	0	0	0	2
GCA_000597165.1	F92073	99.882	99.874	0	0	0	0	98.978	0	0	0	0	0	0	0	0	0	0	0	0	2
GCA_000597185.1	F92105_080312	99.882	99.874	0	0	0	0	98.978	0	0	0	0	0	0	0	0	0	0	0	0	2
GCA_000597205.1	F92125	99.882	99.874	0	0	0	0	98.978	0	0	0	0	0	0	0	0	0	0	0	0	2
GCA_000597225.1	F92127	99.882	99.874	0	0	0	0	98.978	0	0	0	0	0	0	0	0	0	0	0	0	2
GCA_000597245.1	F92128	99.882	99.748	0	0	0	0	98.978	0	0	0	0	0	0	0	0	0	0	0	0	2
GCA_000597265.1	H65830	99.882	99.874	0	0	0	0	98.978	0	0	0	0	0	0	0	0	0	0	0	0	2
GCA_000597285.1	H72115	99.882	99.874	0	0	0	0	98.978	0	0	0	0	0	0	0	0	0	0	0	0	2
GCA_000597325.1	M52622	99.882	99.874	0	0	0	0	98.841	0	0	0	0	0	0	0	0	0	0	0	0	2
GCA_000597345.1	T18851	99.882	100	0	0	0	0	99.184	0	0	0	0	0	0	0	0	0	0	0	0	2
GCA_000597365.1	T18865	99.882	99.874	0	0	0	0	98.978	0	0	0	0	0	0	0	0	0	0	0	0	2
GCA_000597425.1	T39082	99.882	99.874	0	0	0	0	98.978	0	0	0	0	0	0	0	0	0	0	0	0	2
GCA_000597445.1	W73649	99.882	99.874	0	0	0	0	98.978	0	0	0	0	0	0	0	0	0	0	0	0	2
GCA_000597485.1	W83133	99.882	99.874	0	0	0	0	98.978	0	0	0	0	0	0	0	0	0	0	0	0	2
GCA_000597505.1	W89268	99.95	100	0	0	0	0	0	0	0	0	0	0	0	0	0	0	0	0	0	1
GCA_000597525.1	AMMC6114	99.882	99.874	0	0	0	0	98.909	0	0	0	0	0	0	0	0	0	0	0	0	2
GCA_000597545.1	UCIM6049	99.882	99.874	0	0	0	0	98.978	0	0	0	0	0	0	0	0	0	0	0	0	2
GCA_000601665.1	H59329	99.95	99.874	0	0	0	0	0	0	0	0	0	0	0	0	0	0	0	0	0	1
GCA_000601685.1	M62794	99.95	99.874	0	0	0	0	0	0	0	0	0	0	0	0	0	0	0	0	0	1
GCA_000601705.1	M66468	99.95	99.866	0	0	0	0	98.444	0	0	0	0	0	0	0	0	0	0	0	0	2
GCA_000601725.1	T25283	99.95	99.874	0	0	0	0	98.978	0	0	0	0	0	0	0	0	0	0	0	0	2
GCA_000601765.1	T35596	99.95	99.866	0	0	0	0	98.444	0	0	0	0	0	0	0	0	0	0	0	0	2
GCA_000601805.1	W12538	99.95	99.874	0	0	0	0	98.444	0	0	0	0	0	0	0	0	0	0	0	0	2
GCA_000601965.1	F91072	99.95	0	0	0	0	0	0	0	0	0	0	0	0	0	0	0	0	0	0	0
GCA_000601985.1	F91077	99.95	99.874	0	0	0	0	98.444	0	0	0	0	0	0	0	0	0	0	0	0	2
GCA_000602005.1	M72054	99.882	99.874	0	0	0	0	98.444	0	0	0	0	0	0	0	0	0	0	0	0	2
GCA_000602105.1	W75229	100	99.874	0	0	0	0	98.978	0	0	0	0	0	0	0	0	0	0	0	0	2
GCA_000602145.1	W82215	99.95	99.874	0	0	0	0	0	0	0	0	0	0	0	0	0	0	0	0	0	1
GCA_000602185.1	W85837	99.95	0	0	0	0	0	0	0	0	0	0	0	0	0	0	0	0	0	0	0
GCA_000602265.1	F48959	99.95	0	0	0	0	0	0	0	0	0	0	0	0	0	0	0	0	0	0	0
GCA_000602305.1	F71576	99.95	0	0	0	0	0	0	0	0	0	0	0	0	0	0	0	0	0	0	0
GCA_000602325.1	F74820	99.882	99.874	0	0	0	0	98.841	0	0	0	0	0	0	0	0	0	0	0	0	2
GCA_000602365.1	H19398	99.882	99.874	0	0	0	0	98.978	0	0	0	0	0	0	0	0	0	0	0	0	2
GCA_000602405.1	H19420	99.882	99.874	0	0	0	0	98.978	0	0	0	0	0	0	0	0	0	0	0	0	2
GCA_000602425.1	H43694	99.882	0	0	0	0	0	0	0	0	0	0	0	0	0	0	0	0	0	0	0
GCA_000602445.1	H47117	99.882	99.874	0	0	0	0	98.978	0	0	0	0	0	0	0	0	0	0	0	0	2
GCA_000602485.1	M20726	99.882	99.874	0	0	0	0	98.978	0	0	0	0	0	0	0	0	0	0	0	0	2
GCA_000602505.1	M42212	99.882	99.874	0	0	0	0	98.978	0	0	0	0	0	0	0	0	0	0	0	0	2
GCA_000602525.1	M57729	99.882	99.874	0	0	0	0	98.978	0	0	0	0	0	0	0	0	0	0	0	0	2
GCA_000602545.1	M79667	99.95	0	0	0	0	0	0	0	0	0	0	0	0	0	0	0	0	0	0	0
GCA_000602585.1	T42550	99.882	99.748	0	0	0	0	99.184	0	0	0	0	0	0	0	0	0	0	0	0	2
GCA_000602605.1	T47161	99.882	99.874	0	0	0	0	98.978	0	0	0	0	0	0	0	0	0	0	0	0	2
GCA_000602625.1	W19225	99.95	0	0	0	0	0	0	0	0	0	0	0	0	0	0	0	0	0	0	0
GCA_000602645.1	W35455	99.882	100	0	0	0	0	98.978	0	0	0	0	0	0	0	0	0	0	0	0	2
GCA_000602685.1	W42270	99.882	99.874	0	0	0	0	98.978	0	0	0	0	0	0	0	0	0	0	0	0	2
GCA_000602705.1	W52298	99.882	99.874	0	0	0	0	98.978	0	0	0	0	0	0	0	0	0	0	0	0	2
GCA_000602725.1	F31078	99.95	0	0	0	0	0	0	0	0	0	0	0	0	0	0	0	0	0	0	0
GCA_000602825.1	H12890	99.882	99.874	0	0	0	0	98.841	0	0	0	0	0	0	0	0	0	0	0	0	2
GCA_000602845.1	H20315	99.882	99.874	0	0	0	0	98.978	0	0	0	0	0	0	0	0	0	0	0	0	2
GCA_000602865.1	H50411	99.882	99.874	0	0	0	0	98.978	0	0	0	0	0	0	0	0	0	0	0	0	2
GCA_000602905.1	M67929_020413	99.882	99.874	0	0	0	0	98.978	0	0	0	0	0	0	0	0	0	0	0	0	2
GCA_000602925.1	M67957	99.882	99.874	0	0	0	0	98.978	0	0	0	0	0	0	0	0	0	0	0	0	2
GCA_000602985.1	W24177	99.882	99.874	0	0	0	0	98.978	0	0	0	0	0	0	0	0	0	0	0	0	2
GCA_000603005.1	W41765	99.882	99.874	0	0	0	0	98.978	0	0	0	0	0	0	0	0	0	0	0	0	2
GCA_000603045.1	W80041	99.882	99.874	0	0	0	0	98.978	0	0	0	0	0	0	0	0	0	0	0	0	2
GCA_000603065.1	W80042	99.882	99.874	0	0	0	0	98.978	0	0	0	0	0	0	0	0	0	0	0	0	2
GCA_000603105.1	F71592	99.882	99.874	0	0	0	0	98.978	0	0	0	0	0	0	0	0	0	0	0	0	2
GCA_000603125.1	F91084	99.882	99.874	0	0	0	0	98.909	0	0	0	0	0	0	0	0	0	0	0	0	2
GCA_000604465.1	W13012_022013	99.882	99.874	0	0	0	0	98.978	0	0	0	0	0	0	0	0	0	0	0	0	2
GCA_000626875.1	CO-49	99.882	99.874	0	0	0	0	98.909	0	0	0	0	0	0	0	0	0	0	0	0	2
GCA_000626895.1	CO-85	99.764	99.874	0	0	0	0	98.909	0	0	0	0	0	0	0	0	0	0	0	0	2
GCA_000697745.1	CO-86	97.991	0	0	0	0	0	99.184	0	0	0	0	0	0	0	0	0	0	0	0	1
GCA_000734845.1	CO-06	99.882	99.874	0	0	0	0	98.978	0	0	0	0	0	0	0	0	0	0	0	0	2
GCA_000982105.1	MRSN 8611	99.882	99.874	0	0	0	0	98.978	0	0	0	0	0	0	0	0	0	0	0	0	2
GCA_000982135.1	MRSN 8613	99.882	99.874	0	0	0	0	98.978	0	0	0	0	0	0	0	0	0	0	0	0	2
GCA_000982185.1	MRSN 2761	99.882	99.874	0	0	0	0	98.978	0	0	0	0	0	0	0	0	0	0	0	0	2
GCA_000982775.1	USFL094	99.882	99.874	0	0	0	0	98.978	0	0	0	0	0	0	0	0	0	0	0	0	2
GCA_001045725.1	E1470	97.991	0	0	0	0	0	0	0	0	0	0	0	0	0	0	0	0	0	0	0
GCA_001046075.1	C2403	99.882	99.874	0	0	0	0	98.978	0	0	0	0	0	0	0	0	0	0	0	0	2
GCA_001046105.1	C1407	99.882	99.874	0	0	0	0	99.184	0	0	0	0	0	0	0	0	0	0	0	0	2
GCA_001046135.1	C1440	99.882	99.874	0	0	0	0	98.978	0	0	0	0	0	0	0	0	0	0	0	0	2
GCA_001046145.1	42186	99.882	99.874	0	0	0	0	98.978	0	0	0	0	0	0	0	0	0	0	0	0	2
GCA_001046175.1	C2701	99.882	0	0	0	0	0	98.978	0	0	0	0	0	0	0	0	0	0	0	0	1
GCA_001046195.1	C1396	99.882	99.874	0	0	0	0	98.978	0	0	0	0	0	0	0	0	0	0	0	0	2
GCA_001046215.1	C2304	99.882	99.874	0	0	0	0	99.184	0	0	0	0	0	0	0	0	0	0	0	0	2
GCA_001046235.1	C1543	99.882	99.748	0	0	0	0	98.978	0	0	0	0	0	0	0	0	0	0	0	0	2
GCA_001046345.1	99-48	97.991	0	0	0	0	0	0	0	0	0	0	0	0	0	0	0	0	0	0	0
GCA_001046375.1	C1768	97.991	0	0	0	0	0	0	0	0	0	0	0	0	0	0	0	0	0	0	0
GCA_001046395.1	43466	97.991	0	0	0	0	0	0	0	0	0	0	0	0	0	0	0	0	0	0	0
GCA_001046405.1	C1378	99.882	99.874	0	0	0	0	98.978	0	0	0	0	0	0	0	0	0	0	0	0	2
GCA_001046435.1	C1979	99.95	0	0	0	0	0	0	0	0	0	0	0	0	0	0	0	0	0	0	0
GCA_001046445.1	C1762	99.882	99.874	0	0	0	0	98.978	0	0	0	0	0	0	0	0	0	0	0	0	2
GCA_001046475.1	14977	99.882	99.874	0	0	0	0	98.978	0	0	0	0	0	0	0	0	0	0	0	0	2
GCA_001046485.1	C2191	99.882	99.874	0	0	0	0	98.978	0	0	0	0	0	0	0	0	0	0	0	0	2
GCA_001046505.1	C1427	99.882	99.874	0	0	0	0	98.978	0	0	0	0	0	0	0	0	0	0	0	0	2
GCA_001046535.1	C1504	99.882	99.874	0	0	0	0	98.978	0	0	0	0	0	0	0	0	0	0	0	0	2
GCA_001046555.1	99-06	97.991	0	0	0	0	0	0	0	0	0	0	0	0	0	0	0	0	0	0	0
GCA_001046575.1	C1782	97.991	0	0	0	0	0	0	0	0	0	0	0	0	0	0	0	0	0	0	0
GCA_001046585.1	C1410	97.991	0	0	0	0	0	0	0	0	0	0	0	0	0	0	0	0	0	0	0
GCA_001046615.1	C1555	97.991	0	0	0	0	0	0	0	0	0	0	0	0	0	0	0	0	0	0	0
GCA_001047795.1	USFL004	99.882	0	0	0	0	0	98.978	0	0	0	0	0	0	0	0	0	0	0	0	1
GCA_001047815.1	USFL003	99.882	0	0	0	0	0	98.978	0	0	0	0	0	0	0	0	0	0	0	0	1
GCA_001047835.1	USFL005	99.882	99.874	0	0	0	0	99.036	0	0	0	0	0	0	0	0	0	0	0	0	2
GCA_001047855.1	USFL001	99.882	0	0	0	0	0	99.124	0	0	0	0	0	0	0	0	0	0	0	0	1
GCA_001060575.1	1214_SAUR	99.882	99.874	0	0	0	0	99.048	0	0	0	0	0	0	0	0	0	0	0	0	2
GCA_001061235.1	1215_SAUR	99.882	99.874	0	0	0	0	99.048	0	0	0	0	0	0	0	0	0	0	0	0	2
GCA_001062355.1	1227_SAUR	99.882	99.874	0	0	0	0	99.048	0	0	0	0	0	0	0	0	0	0	0	0	2
GCA_001065315.1	519_SAUR	99.882	99.874	0	0	0	0	99.184	0	0	0	0	0	0	0	0	0	0	0	0	2
GCA_001067705.1	950_SAUR	99.764	0	0	0	0	0	99.184	0	0	0	0	0	0	0	0	0	0	0	0	1
GCA_001068155.1	937_SAUR	99.882	99.874	0	0	0	0	98.978	0	0	0	0	0	0	0	100	0	0	0	0	3
GCA_001068255.1	955_SAUR	99.882	0	0	0	0	0	99.184	0	0	0	0	0	0	0	0	0	0	0	0	1
GCA_001192235.1	USFL033	99.882	99.874	0	0	0	0	98.978	0	0	0	0	0	0	0	0	0	0	0	0	2
GCA_001192495.1	USFL151	99.882	99.874	0	0	0	0	98.978	0	0	0	0	0	0	0	0	0	0	0	0	2
GCA_001192715.1	USFL315	99.882	99.874	0	0	0	0	98.978	0	0	0	0	0	0	0	0	0	0	0	0	2
GCA_001192755.1	USFL015	99.882	0	0	0	0	0	99.184	0	0	0	0	0	0	100	0	0	0	0	0	2
GCA_001192775.1	USFL142	99.882	99.874	0	0	0	0	98.978	0	0	0	0	0	0	0	0	0	0	0	0	2
GCA_001192855.1	USFL086	99.882	99.874	0	0	0	0	99.184	0	0	0	0	0	0	0	0	0	0	0	0	2
GCA_001192915.1	USFL257	99.95	0	0	0	0	0	98.912	0	0	0	0	0	0	99.928	0	0	0	0	0	2
GCA_001193135.1	USFL021	99.882	100	0	0	0	0	98.978	0	0	0	0	0	0	0	0	0	0	0	0	2
GCA_001193255.1	USFL196	99.882	99.874	0	0	0	0	98.978	0	0	0	0	0	0	0	0	0	0	0	0	2
GCA_001193715.1	USFL018	99.882	99.874	0	0	0	0	99.184	0	0	0	0	0	0	0	0	0	0	0	0	2
GCA_001193795.1	USFL276	99.882	99.874	0	0	0	0	98.978	0	0	0	0	0	0	0	0	0	0	0	0	2
GCA_001194165.1	USFL301	99.882	99.874	0	0	0	0	0	0	0	0	0	0	0	0	0	0	0	0	0	1
GCA_001194245.1	USFL130	99.95	0	0	0	0	0	0	0	0	0	0	0	0	0	0	0	0	0	0	0
GCA_001194265.1	USFL317	99.882	99.874	0	0	0	0	98.978	0	0	0	0	0	0	0	0	0	0	0	0	2
GCA_001194285.1	USFL108	99.882	99.874	0	0	0	0	98.978	0	0	0	0	0	0	0	0	0	0	0	0	2
GCA_001194445.1	USFL339	99.882	0	0	0	0	0	98.978	0	0	0	0	0	0	0	0	0	0	0	0	1
GCA_001194465.1	USFL075	99.882	99.874	0	0	0	0	98.978	0	0	0	0	0	0	0	0	0	0	0	0	2
GCA_001194505.1	USFL329	99.882	99.874	0	0	0	0	98.909	0	0	0	0	0	0	0	0	0	0	0	0	2
GCA_001194545.1	USFL149	99.882	99.874	0	0	0	0	98.978	0	0	0	0	0	0	0	0	0	0	0	0	2
GCA_001194585.1	USFL047	0	0	0	0	0	0	0	0	0	0	0	0	0	0	0	0	0	0	0	0
GCA_001194705.1	USFL311	99.882	99.874	0	0	0	0	98.978	0	0	0	0	0	0	0	0	0	0	0	0	2
GCA_001194965.1	USFL159	99.882	99.874	0	0	0	0	98.978	0	0	0	0	0	0	0	0	0	0	0	0	2
GCA_001195025.1	USFL284	99.882	99.874	0	0	0	0	98.978	0	0	0	0	0	0	0	0	0	0	0	0	2
GCA_001195085.1	USFL099	99.882	99.874	0	0	0	0	98.978	0	0	0	0	0	0	99.916	0	0	0	0	0	3
GCA_001195305.1	USFL198	99.882	99.874	0	0	0	0	98.978	0	0	0	0	0	0	0	0	0	0	0	0	2
GCA_001195345.1	USFL205	99.882	99.874	0	0	0	0	98.978	0	0	0	0	0	0	0	0	0	0	0	0	2
GCA_001195585.1	USFL309	99.882	99.874	0	0	0	0	98.978	0	0	0	0	0	0	0	0	0	0	0	0	2
GCA_001195605.1	USFL290	99.882	99.874	0	0	0	0	98.978	0	0	0	0	0	0	0	0	0	0	0	0	2
GCA_001195805.1	FL369	99.882	99.874	0	0	0	0	98.978	0	0	0	0	0	0	0	0	0	0	0	0	2
GCA_001195945.1	USFL334	99.882	99.874	0	0	0	0	98.978	0	0	0	0	0	0	0	0	0	0	0	0	2
GCA_001196025.1	USFL135	97.991	0	0	0	0	0	0	0	0	0	0	0	0	0	0	0	0	0	0	0
GCA_001196145.1	USFL158	99.882	99.874	0	0	0	0	98.978	0	0	0	0	0	0	0	0	0	0	0	0	2
GCA_001196165.1	USFL062	97.991	0	0	0	0	0	0	0	0	0	0	0	0	0	0	0	0	0	0	0
GCA_001196275.1	USFL039	99.882	99.874	0	0	0	0	98.978	0	0	0	0	0	0	0	0	0	0	0	0	2
GCA_001196415.1	USFL242	99.882	99.874	0	0	0	0	98.978	0	0	0	0	0	0	0	0	0	0	0	0	2
GCA_001196515.1	USFL281	99.882	99.874	0	0	0	0	98.978	0	0	0	0	0	0	0	0	0	0	0	0	2
GCA_001196675.1	USFL216	99.882	99.874	0	0	0	0	98.978	0	0	0	0	0	0	0	0	0	0	0	0	2
GCA_001196815.1	USFL267	99.882	99.874	0	0	0	0	98.978	0	0	0	0	0	0	0	0	0	0	0	0	2
GCA_001196895.1	USFL224	99.882	99.874	0	0	0	0	98.978	0	0	0	0	0	0	0	100	0	0	0	0	3
GCA_001197175.1	USFL084	99.882	99.874	0	0	0	0	98.978	0	0	0	0	0	0	0	0	0	0	0	0	2
GCA_001197375.1	USFL077	99.882	99.874	0	0	0	0	98.978	0	0	0	0	0	0	0	0	0	0	0	0	2
GCA_001197595.1	USFL059	99.882	99.874	0	0	0	0	98.978	0	0	0	0	0	0	0	0	0	0	0	0	2
GCA_001197735.1	USFL255	99.882	99.874	0	0	0	0	98.978	0	0	0	0	0	0	0	0	0	0	0	0	2
GCA_001198055.1	USFL104	99.882	99.874	0	0	0	0	99.184	0	0	0	0	0	0	0	0	0	0	0	0	2
GCA_001198135.1	USFL343	99.882	99.874	0	0	0	0	98.978	0	0	0	0	0	0	0	0	0	0	0	0	2
GCA_001198155.1	USFL265	99.882	99.874	0	0	0	0	98.978	0	0	0	0	0	0	0	0	0	0	0	0	2
GCA_001198415.1	USFL184	99.882	99.874	0	0	0	0	98.978	0	0	0	0	0	0	99.928	0	0	0	0	0	3
GCA_001198695.1	USFL063	99.882	100	0	0	0	0	98.978	0	0	0	0	0	0	0	0	0	0	0	0	2
GCA_001198775.1	USFL296	99.882	99.874	0	0	0	0	98.978	0	0	0	0	0	0	0	0	0	0	0	0	2
GCA_001199015.1	USFL124	99.882	99.874	0	0	0	0	98.978	0	0	0	0	0	0	0	0	0	0	0	0	2
GCA_001199135.1	USFL029	99.882	99.874	0	0	0	0	98.909	0	0	0	0	0	0	0	0	0	0	0	0	2
GCA_001199175.1	USFL093	99.882	99.874	0	0	0	0	98.978	0	0	0	0	0	0	0	0	0	0	0	0	2
GCA_001199375.1	USFL324	99.882	99.874	0	0	0	0	98.978	0	0	0	0	0	0	0	0	0	0	0	0	2
GCA_001199615.1	USFL347	99.882	99.874	0	0	0	0	98.978	0	0	0	0	0	0	0	0	0	0	0	0	2
GCA_001199755.1	USFL214	99.882	99.874	0	0	0	0	98.978	0	0	0	0	0	0	0	0	0	0	0	0	2
GCA_001199775.1	USFL279	99.882	99.874	0	0	0	0	98.912	0	0	0	0	0	0	99.928	0	0	0	0	0	3
GCA_001200155.1	USFL053	99.882	99.874	0	0	0	0	98.978	0	0	0	0	0	0	0	0	0	0	0	0	2
GCA_001200375.1	USFL193	99.882	99.874	0	0	0	0	98.978	0	0	0	0	0	0	0	0	0	0	0	0	2
GCA_001200515.1	USFL325	99.882	99.874	0	0	0	0	98.978	0	0	0	0	0	0	0	0	0	0	0	0	2
GCA_001200595.1	USFL319	99.882	99.874	0	0	0	0	98.978	0	0	0	0	0	0	0	0	0	0	0	0	2
GCA_001200715.1	USFL088	99.95	0	0	0	0	0	99.184	0	0	0	0	0	0	0	0	0	0	0	0	1
GCA_001201135.1	USFL036	99.882	99.874	0	0	0	0	98.978	0	0	0	0	0	0	0	0	0	0	0	0	2
GCA_001201255.1	USFL201	99.882	99.874	0	0	0	0	98.978	0	0	0	0	0	0	0	0	0	0	0	0	2
GCA_001201455.1	USFL338	99.882	0	0	0	0	0	98.978	0	0	0	0	0	0	0	0	0	0	0	0	1
GCA_001201555.1	USFL170	99.882	100	0	0	0	0	98.978	0	0	0	0	0	0	0	0	0	0	0	0	2
GCA_001201695.1	USFL080	99.882	99.874	0	0	0	0	98.978	0	0	0	0	0	0	0	0	0	0	0	0	2
GCA_001201715.1	USFL321	99.882	99.874	0	0	0	0	98.978	0	0	0	0	0	0	0	0	0	0	0	0	2
GCA_001202095.1	USFL120	99.882	99.874	0	0	0	0	98.978	0	0	0	0	0	0	0	0	0	0	0	0	2
GCA_001202175.1	USFL295	99.882	99.874	0	0	0	0	98.978	0	0	0	0	0	0	0	0	0	0	0	0	2
GCA_001202395.1	USFL208	99.882	99.874	0	0	0	0	98.978	0	0	0	0	0	0	0	0	0	0	0	0	2
GCA_001202535.1	USFL175	99.882	99.874	0	0	0	0	98.978	0	0	0	0	0	0	0	0	0	0	0	0	2
GCA_001203135.1	USFL028	99.882	99.874	0	0	0	0	98.978	0	0	0	0	0	0	0	0	0	0	0	0	2
GCA_001203255.1	USFL153	99.882	99.874	0	0	0	0	98.978	0	0	0	0	0	0	0	0	0	0	0	0	2
GCA_001203315.1	USFL009	99.882	99.874	0	0	0	0	98.978	0	0	0	0	0	0	0	0	0	0	0	0	2
GCA_001203535.1	USFL199	99.882	99.874	0	0	0	0	98.978	0	0	0	0	0	0	0	0	0	0	0	0	2
GCA_001203675.1	USFL010	99.882	0	0	0	0	0	0	0	0	0	0	0	0	0	0	0	0	0	0	0
GCA_001203695.1	USFL008	99.882	99.874	0	0	0	0	98.978	0	0	0	0	0	0	0	0	0	0	0	0	2
GCA_001203755.1	FL375	99.882	99.874	0	0	0	0	98.978	0	0	0	0	0	0	0	0	0	0	0	0	2
GCA_001203795.1	USFL035	99.882	99.874	0	0	0	0	98.978	0	0	0	0	0	0	0	0	0	0	0	0	2
GCA_001203835.1	USFL332	99.882	99.874	0	0	0	0	98.978	0	0	0	0	0	0	0	0	0	0	0	0	2
GCA_001204115.1	USFL331	99.882	99.874	0	0	0	0	0	0	0	0	0	0	0	0	0	0	0	0	0	1
GCA_001204195.1	USFL239	99.764	99.874	0	0	0	0	98.978	0	0	0	0	0	0	0	0	0	0	0	0	2
GCA_001204255.1	USFL164	99.882	99.874	0	0	0	0	98.978	0	0	0	0	0	0	0	0	0	0	0	0	2
GCA_001204295.1	USFL209	99.882	99.874	0	0	0	0	98.978	0	0	0	0	0	0	0	0	0	0	0	0	2
GCA_001204415.1	USFL351	99.95	0	0	0	0	0	99.184	0	0	0	0	0	0	0	0	0	0	0	0	1
GCA_001204475.1	USFL238	99.882	0	0	0	0	0	99.184	0	0	0	0	0	0	0	0	0	0	0	0	1
GCA_001204755.1	USFL023	99.882	99.874	0	0	0	0	98.909	0	0	0	0	0	0	0	0	0	0	0	0	2
GCA_001204975.1	USFL085	99.882	99.874	0	0	0	0	99.184	0	0	0	0	0	0	0	0	0	0	0	0	2
GCA_001204995.1	USFL248	99.95	0	0	0	0	0	99.456	0	0	0	0	0	0	98.073	0	0	0	0	0	2
GCA_001205075.1	USFL172	99.882	99.874	0	0	0	0	98.978	0	0	0	0	0	0	0	0	0	0	0	0	2
GCA_001205135.1	USFL303	99.764	99.874	0	0	0	0	98.978	0	0	0	0	0	0	0	0	0	0	0	0	2
GCA_001205195.1	USFL070	99.882	99.874	0	0	0	0	98.978	0	0	0	0	0	0	0	0	0	0	0	0	2
GCA_001205395.1	USFL186	99.882	99.874	0	0	0	0	98.978	0	0	0	0	0	0	0	0	0	0	0	0	2
GCA_001205495.1	USFL074	99.882	99.874	0	0	0	0	99.184	0	0	0	0	0	0	0	0	0	0	0	0	2
GCA_001205535.1	USFL249	99.95	0	0	0	0	0	99.456	0	0	0	0	0	0	98.073	0	0	0	0	0	2
GCA_001205895.1	USFL289	99.882	99.874	0	0	0	0	98.978	0	0	0	0	0	0	0	0	0	0	0	0	2
GCA_001206095.1	USFL211	99.882	99.874	0	0	0	0	98.978	0	0	0	0	0	0	0	0	0	0	0	0	2
GCA_001206115.1	USFL101	97.991	0	0	0	0	0	0	0	0	0	0	0	0	0	0	0	0	0	0	0
GCA_001206195.1	USFL144	99.882	99.874	0	0	0	0	98.909	0	0	0	0	0	0	0	0	0	0	0	0	2
GCA_001206215.1	USFL191	99.882	99.874	0	0	0	0	98.978	0	0	0	0	0	0	0	0	0	0	0	0	2
GCA_001206735.1	USFL268	99.882	99.874	0	0	0	0	98.978	0	0	0	0	0	0	0	0	0	0	0	0	2
GCA_001206755.1	USFL019	99.882	99.874	0	0	0	0	98.978	0	0	0	0	0	0	0	0	0	0	0	0	2
GCA_001206795.1	USFL078	97.991	0	0	0	0	0	0	0	0	0	0	0	0	0	0	0	0	0	0	0
GCA_001206875.1	USFL150	99.882	99.874	0	0	0	0	98.912	0	0	0	0	0	0	0	0	0	0	0	0	2
GCA_001206995.1	USFL212	99.882	100	0	0	0	0	98.978	0	0	0	0	0	0	0	0	0	0	0	0	2
GCA_001207235.1	USFL333	99.882	99.874	0	0	0	0	98.978	0	0	0	0	0	0	0	0	0	0	0	0	2
GCA_001207315.1	FL395	99.882	99.874	0	0	0	0	98.978	0	0	0	0	0	0	0	0	0	0	0	0	2
GCA_001207395.1	USFL293	99.882	99.874	0	0	0	0	98.978	0	0	0	0	0	0	0	0	0	0	0	0	2
GCA_001207415.1	USFL006	99.882	99.874	0	0	0	0	98.978	0	0	0	0	0	0	0	0	0	0	0	0	2
GCA_001207455.1	USFL286	99.882	99.874	0	0	0	0	98.978	0	0	0	0	0	0	0	0	0	0	0	0	2
GCA_001207595.1	USFL141	99.882	99.874	0	0	0	0	98.978	0	0	0	0	0	0	0	0	0	0	0	0	2
GCA_001207845.1	USFL131	99.95	0	0	0	0	0	0	0	0	0	0	0	0	0	0	0	0	0	0	0
GCA_001208385.1	USFL148	99.882	99.874	0	0	0	0	98.978	0	0	0	0	0	0	0	0	0	0	0	0	2
GCA_001208405.1	USFL165	99.882	99.874	0	0	0	0	98.978	0	0	0	0	0	0	0	0	0	0	0	0	2
GCA_001208445.1	USFL282	99.882	99.874	0	0	0	0	99.184	0	0	0	0	0	0	0	0	0	0	0	0	2
GCA_001208745.1	USFL269	99.882	99.874	0	0	0	0	98.978	0	0	0	0	0	0	0	0	0	0	0	0	2
GCA_001208825.1	FL361	99.882	99.874	0	0	0	0	98.978	0	0	0	0	0	0	0	0	0	0	0	0	2
GCA_001208925.1	FL374	99.882	99.874	0	0	0	0	98.978	0	0	0	0	0	0	0	0	0	0	0	0	2
GCA_001208945.1	USFL342	99.882	99.874	0	0	0	0	98.978	0	0	0	0	0	0	0	0	0	0	0	0	2
GCA_001208965.1	USFL230	99.764	99.874	0	0	0	0	98.978	0	0	0	0	0	0	0	0	0	0	0	0	2
GCA_001208985.1	USFL272	99.882	99.874	0	0	0	0	98.912	0	0	0	0	0	0	99.928	0	0	0	0	0	3
GCA_001209125.1	USFL121	99.882	99.874	0	0	0	0	98.978	0	0	0	0	0	0	0	0	0	0	0	0	2
GCA_001209165.1	USFL136	99.882	99.874	0	0	0	0	98.978	0	0	0	0	0	0	0	0	0	0	0	0	2
GCA_001209185.1	USFL081	99.882	99.874	0	0	0	0	98.978	0	0	0	0	0	0	0	0	0	0	0	0	2
GCA_001209205.1	USFL030	99.882	99.874	0	0	0	0	98.909	0	0	0	0	0	0	0	0	0	0	0	0	2
GCA_001209265.1	USFL188	99.882	99.874	0	0	0	0	98.978	0	0	0	0	0	0	0	0	0	0	0	0	2
GCA_001209345.1	USFL041	99.882	99.874	0	0	0	0	98.978	0	0	0	0	0	0	0	0	0	0	0	0	2
GCA_001209545.1	USFL320	99.882	99.874	0	0	0	0	98.978	0	0	0	0	0	0	0	0	0	0	0	0	2
GCA_001209565.1	USFL328	99.882	0	0	0	0	0	0	0	0	0	0	0	0	0	0	0	0	0	0	0
GCA_001209605.1	USFL344	99.882	99.874	0	0	0	0	98.978	0	0	0	0	0	0	0	0	0	0	0	0	2
GCA_001209625.1	USFL304	99.882	99.874	0	0	0	0	98.978	0	0	0	0	0	0	0	0	0	0	0	0	2
GCA_001209725.1	USFL240	99.882	99.874	0	0	0	0	98.978	0	0	0	0	0	0	0	0	0	0	0	0	2
GCA_001209745.1	USFL195	99.882	99.874	0	0	0	0	98.978	0	0	0	0	0	0	0	0	0	0	0	0	2
GCA_001209885.1	USFL259	99.882	99.874	0	0	0	0	98.978	0	0	0	0	0	0	0	0	0	0	0	0	2
GCA_001209925.1	USFL250	99.882	99.748	0	0	0	0	98.978	0	0	0	0	0	0	0	100	0	0	0	0	3
GCA_001210205.1	FL394	99.882	99.874	0	0	0	0	98.909	0	0	0	0	0	0	0	0	0	0	0	0	2
GCA_001210225.1	USFL020	99.95	0	0	0	0	0	0	0	0	0	0	0	0	0	0	0	0	0	0	0
GCA_001210265.1	USFL160	99.882	99.874	0	0	0	0	98.978	0	0	0	0	0	0	0	0	0	0	0	0	2
GCA_001210285.1	USFL206	99.882	99.874	0	0	0	0	98.978	0	0	0	0	0	0	0	0	0	0	0	0	2
GCA_001210325.1	USFL100	99.882	0	0	0	0	0	0	0	0	0	0	0	0	99.928	0	0	0	0	0	1
GCA_001210425.1	USFL109	99.882	99.874	0	0	0	0	98.978	0	0	0	0	0	0	0	0	0	0	0	0	2
GCA_001210785.1	USFL243	99.882	99.748	0	0	0	0	98.978	0	0	0	0	0	0	0	100	0	0	0	0	3
GCA_001210845.1	USFL152	99.882	99.874	0	0	0	0	98.978	0	0	0	0	0	0	0	0	0	0	0	0	2
GCA_001210885.1	USFL280	99.882	99.874	0	0	0	0	98.978	0	0	0	0	0	0	0	0	0	0	0	0	2
GCA_001211045.1	USFL112	99.882	0	0	0	0	0	0	0	0	0	0	0	0	0	0	0	0	0	0	0
GCA_001211085.1	USFL089	99.95	0	0	0	0	0	99.184	0	0	0	0	0	0	0	0	0	0	0	0	1
GCA_001211185.1	USFL330	99.882	0	0	0	0	0	98.978	0	0	0	0	0	0	0	0	0	0	0	0	1
GCA_001211265.1	USFL271	99.882	99.874	0	0	0	0	98.978	0	0	0	0	0	0	0	0	0	0	0	0	2
GCA_001211325.1	USFL031	99.882	99.748	0	0	0	0	98.978	0	0	0	0	0	0	0	0	0	0	0	0	2
GCA_001211485.1	USFL097	99.882	99.874	0	0	0	0	98.978	0	0	0	0	0	0	0	0	0	0	0	0	2
GCA_001211525.1	USFL213	99.882	99.874	0	0	0	0	98.978	0	0	0	0	0	0	0	0	0	0	0	0	2
GCA_001211665.1	USFL066	99.95	0	0	0	0	0	0	0	0	0	0	0	0	0	0	0	0	0	0	0
GCA_001211685.1	USFL125	97.991	0	0	0	0	0	0	0	0	0	0	0	0	0	0	0	0	0	0	0
GCA_001211745.1	USFL185	99.882	99.874	0	0	0	0	98.978	0	0	0	0	0	0	0	0	0	0	0	0	2
GCA_001211825.1	USFL133	99.882	99.874	0	0	0	0	98.978	0	0	0	0	0	0	0	0	0	0	0	0	2
GCA_001211885.1	FL373	99.882	99.874	0	0	0	0	98.978	0	0	0	0	0	0	0	0	0	0	0	0	2
GCA_001211925.1	USFL305	99.882	99.874	0	0	0	0	98.978	0	0	0	0	0	0	0	0	0	0	0	0	2
GCA_001211965.1	USFL058	97.991	0	0	0	0	0	0	0	0	0	0	0	0	0	0	0	0	0	0	0
GCA_001212085.1	USFL200	99.882	99.874	0	0	0	0	98.978	0	0	0	0	0	0	0	0	0	0	0	0	2
GCA_001212145.1	USFL092	99.882	99.874	0	0	0	0	98.978	0	0	0	0	0	0	0	0	0	0	0	0	2
GCA_001212225.1	FL372	99.882	99.874	0	0	0	0	98.978	0	0	0	0	0	0	0	0	0	0	0	0	2
GCA_001212245.1	USFL231	99.764	99.874	0	0	0	0	98.978	0	0	0	0	0	0	0	0	0	0	0	0	2
GCA_001212305.1	USFL161	99.882	99.874	0	0	0	0	98.978	0	0	0	0	0	0	0	0	0	0	0	0	2
GCA_001212365.1	USFL180	99.882	99.874	0	0	0	0	98.978	0	0	0	0	0	0	0	0	0	0	0	0	2
GCA_001212565.1	USFL176	99.882	99.874	0	0	0	0	98.978	0	0	0	0	0	0	0	0	0	0	0	0	2
GCA_001212585.1	USFL258	99.882	99.874	0	0	0	0	98.978	0	0	0	0	0	0	0	0	0	0	0	0	2
GCA_001212605.1	USFL262	99.882	99.874	0	0	0	0	98.978	0	0	0	0	0	0	0	0	0	0	0	0	2
GCA_001212685.1	USFL350	99.95	0	0	0	0	0	99.184	0	0	0	0	0	0	0	0	0	0	0	0	1
GCA_001212745.1	USFL057	99.882	99.874	0	0	0	0	98.978	0	0	0	0	0	0	0	0	0	0	0	0	2
GCA_001212765.1	USFL183	99.882	99.874	0	0	0	0	98.978	0	0	0	0	0	0	99.928	0	0	0	0	0	3
GCA_001262255.1	USFL194	99.882	99.874	0	0	0	0	98.978	0	0	0	0	0	0	99.928	0	0	0	0	0	3
GCA_001262375.1	USFL302	99.764	99.874	0	0	0	0	98.978	0	0	0	0	0	0	0	0	0	0	0	0	2
GCA_001288945.1	2588STDY5514607	99.882	99.874	0	0	0	0	98.978	0	0	0	0	0	0	0	0	0	0	0	0	2
GCA_001351635.1	USFL337	99.882	99.874	0	0	0	0	98.978	0	0	0	0	0	0	0	0	0	0	0	0	2
GCA_001351695.1	USFL336	99.882	99.874	0	0	0	0	98.978	0	0	0	0	0	0	0	0	0	0	0	0	2
GCA_001351715.1	USFL202	99.882	99.874	0	0	0	0	98.978	0	0	0	0	0	0	0	0	0	0	0	0	2
GCA_001351735.1	USFL228	99.882	0	0	0	0	0	99.184	0	0	0	0	0	0	0	0	0	0	0	0	1
GCA_001351775.1	USFL014	99.882	99.874	0	0	0	0	98.978	0	0	0	0	0	0	0	0	0	0	0	0	2
GCA_001351795.1	USFL027	99.95	0	0	0	0	0	0	0	0	0	0	0	0	0	0	0	0	0	0	0
GCA_001351815.1	USFL011	99.882	0	0	0	0	0	98.978	0	0	0	0	0	0	0	0	0	0	0	0	1
GCA_001351855.1	USFL192	99.882	99.874	0	0	0	0	98.978	0	0	0	0	0	0	0	0	0	0	0	0	2
GCA_001351875.1	USFL275	99.882	99.874	0	0	0	0	98.978	0	0	0	0	0	0	0	0	0	0	0	0	2
GCA_001351895.1	USFL219	99.882	99.874	0	0	0	0	98.978	0	0	0	0	0	0	0	0	0	0	0	0	2
GCA_001351915.1	USFL312	99.882	99.874	0	0	0	0	98.978	0	0	0	0	0	0	0	0	0	0	0	0	2
GCA_001351935.1	USFL288	99.882	99.874	0	0	0	0	98.978	0	0	0	0	0	0	0	0	0	0	0	0	2
GCA_001351955.1	USFL218	99.882	99.874	0	0	0	0	98.978	0	0	0	0	0	0	0	0	0	0	0	0	2
GCA_001351975.1	USFL229	99.882	99.874	0	0	0	0	98.978	0	0	0	0	0	0	0	0	0	0	0	0	2
GCA_001351995.1	USFL203	99.882	99.874	0	0	0	0	98.978	0	0	0	0	0	0	0	0	0	0	0	0	2
GCA_001352035.1	USFL352	99.95	0	0	0	0	0	0	0	0	0	0	0	0	0	0	0	0	0	0	0
GCA_001352055.1	USFL026	99.882	99.748	0	0	0	0	98.978	0	0	0	0	0	0	0	0	0	0	0	0	2
GCA_001352075.1	USFL274	99.882	99.874	0	0	0	0	98.978	0	0	0	0	0	0	0	0	0	0	0	0	2
GCA_001352095.1	USFL222	99.95	0	0	0	0	0	0	0	0	0	0	0	0	0	0	0	0	0	0	0
GCA_001352115.1	USFL054	99.882	99.874	0	0	0	0	98.978	0	0	0	0	0	0	0	0	0	0	0	0	2
GCA_001352135.1	USFL273	99.882	99.874	0	0	0	0	98.978	0	0	0	0	0	0	0	0	0	0	0	0	2
GCA_001352155.1	USFL221	99.882	99.874	0	0	0	0	98.978	0	0	0	0	0	0	0	0	0	0	0	0	2
GCA_001352175.1	USFL055	99.882	100	0	0	0	0	98.978	0	0	0	0	0	0	0	0	0	0	0	0	2
GCA_001352195.1	USFL340	99.882	99.874	0	0	0	0	98.978	0	0	0	0	0	0	0	0	0	0	0	0	2
GCA_001352235.1	USFL087	99.882	99.874	0	0	0	0	99.184	0	0	0	0	0	0	0	0	0	0	0	0	2
GCA_001352255.1	USFL227	99.882	0	0	0	0	0	99.184	0	0	0	0	0	0	0	0	0	0	0	0	1
GCA_001352275.1	USFL220	99.882	100	0	0	0	0	98.978	0	0	0	0	0	0	0	0	0	0	0	0	2
GCA_001352295.1	USFL032	99.882	99.874	0	0	0	0	98.978	0	0	0	0	0	0	0	0	0	0	0	0	2
GCA_001352315.1	USFL069	99.882	99.874	0	0	0	0	98.978	0	0	0	0	0	0	0	0	0	0	0	0	2
GCA_001352335.1	USFL056	99.882	100	0	0	0	0	98.978	0	0	0	0	0	0	0	0	0	0	0	0	2
GCA_001352355.1	USFL007	99.882	99.874	0	0	0	0	99.203	0	0	0	0	0	0	0	0	0	0	0	0	2
GCA_001352395.1	USFL252	99.882	99.874	0	0	0	0	98.978	0	0	0	0	0	0	0	0	0	0	0	0	2
GCA_001352415.1	USFL223	99.882	99.874	0	0	0	0	98.978	0	0	0	0	0	0	0	100	0	0	0	0	3
GCA_001352435.1	USFL251	99.882	99.748	0	0	0	0	98.978	0	0	0	0	0	0	0	100	0	0	0	0	3
GCA_001352475.1	USFL270	99.882	99.874	0	0	0	0	98.978	0	0	0	0	0	0	0	0	0	0	0	0	2
GCA_001352515.1	USFL306	99.882	99.874	0	0	0	0	98.909	0	0	0	0	0	0	0	0	0	0	0	0	2
GCA_001352535.1	USFL278	99.882	99.874	0	0	0	0	98.978	0	0	0	0	0	0	0	0	0	0	0	0	2
GCA_001352555.1	USFL064	97.991	0	0	0	0	0	0	0	0	0	0	0	0	0	0	0	0	0	0	0
GCA_001352575.1	USFL307	99.882	99.874	0	0	0	0	98.978	0	0	0	0	0	0	0	0	0	0	0	0	2
GCA_001352595.1	USFL038	99.882	99.874	0	0	0	0	98.978	0	0	0	0	0	0	0	0	0	0	0	0	2
GCA_001352615.1	USFL277	99.882	99.874	0	0	0	0	98.978	0	0	0	0	0	0	0	0	0	0	0	0	2
GCA_001352635.1	USFL079	97.991	0	0	0	0	0	0	0	0	0	0	0	0	0	0	0	0	0	0	0
GCA_001352655.1	USFL065	99.882	99.874	0	0	0	0	98.978	0	0	0	0	0	0	0	0	0	0	0	0	2
GCA_001352675.1	USFL210	99.882	100	0	0	0	0	98.978	0	0	0	0	0	0	0	0	0	0	0	0	2
GCA_001352695.1	USFL237	99.882	99.874	0	0	0	0	98.978	0	0	0	0	0	0	0	0	0	0	0	0	2
GCA_001352715.1	USFL067	99.95	0	0	0	0	0	0	0	0	0	0	0	0	0	0	0	0	0	0	0
GCA_001352735.1	USFL322	99.882	99.874	0	0	0	0	98.978	0	0	0	0	0	0	0	0	0	0	0	0	2
GCA_001352755.1	USFL241	99.882	99.874	0	0	0	0	98.978	0	0	0	0	0	0	0	0	0	0	0	0	2
GCA_001352775.1	USFL076	99.882	99.874	0	0	0	0	98.978	0	0	0	0	0	0	0	0	0	0	0	0	2
GCA_001352795.1	USFL294	99.882	99.874	0	0	0	0	98.978	0	0	0	0	0	0	0	0	0	0	0	0	2
GCA_001352815.1	USFL068	99.882	99.874	0	0	0	0	98.978	0	0	0	0	0	0	0	0	0	0	0	0	2
GCA_001352835.1	USFL256	99.95	0	0	0	0	0	0	0	0	0	0	0	0	0	0	0	0	0	0	0
GCA_001352855.1	USFL323	99.882	99.874	0	0	0	0	98.978	0	0	0	0	0	0	0	0	0	0	0	0	2
GCA_001352875.1	USFL025	99.882	99.874	0	0	0	0	98.909	0	0	0	0	0	0	0	0	0	0	0	0	2
GCA_001352895.1	USFL283	99.882	99.874	0	0	0	0	98.978	0	0	0	0	0	0	0	0	0	0	0	0	2
GCA_001352915.1	USFL348	99.882	99.874	0	0	0	0	98.978	0	0	0	0	0	0	0	0	0	0	0	0	2
GCA_001352935.1	USFL299	99.882	99.874	0	0	0	0	98.978	0	0	0	0	0	0	0	0	0	0	0	0	2
GCA_001352955.1	USFL012	99.882	100	0	0	0	0	98.978	0	0	0	0	0	0	0	0	0	0	0	0	2
GCA_001352995.1	USFL034	99.882	99.874	0	0	0	0	98.978	0	0	0	0	0	0	0	0	0	0	0	0	2
GCA_001353015.1	USFL263	99.882	0	0	0	0	0	98.978	0	0	0	0	0	0	0	0	0	0	0	0	1
GCA_001353035.1	USFL349	99.882	99.874	0	0	0	0	98.978	0	0	0	0	0	0	0	0	0	0	0	0	2
GCA_001353055.1	USFL316	99.882	99.874	0	0	0	0	98.978	0	0	0	0	0	0	0	0	0	0	0	0	2
GCA_001353075.1	USFL300	99.882	99.874	0	0	0	0	0	0	0	0	0	0	0	0	0	0	0	0	0	1
GCA_001353095.1	USFL244	99.882	99.874	0	0	0	0	98.978	0	0	0	0	0	0	0	0	0	0	0	0	2
GCA_001353115.1	USFL061	99.882	99.874	0	0	0	0	98.978	0	0	0	0	0	0	0	0	0	0	0	0	2
GCA_001353135.1	USFL215	99.882	99.874	0	0	0	0	98.978	0	0	0	0	0	0	0	0	0	0	0	0	2
GCA_001353195.1	USFL318	99.882	99.874	0	0	0	0	98.978	0	0	0	0	0	0	0	0	0	0	0	0	2
GCA_001353215.1	USFL285	99.882	99.874	0	0	0	0	98.978	0	0	0	0	0	0	0	0	0	0	0	0	2
GCA_001353235.1	USFL043	99.882	0	0	0	0	0	0	0	0	0	0	0	0	0	0	0	0	0	0	0
GCA_001353255.1	USFL037	99.882	99.874	0	0	0	0	98.978	0	0	0	0	0	0	0	0	0	0	0	0	2
GCA_001353275.1	USFL082	99.882	99.874	0	0	0	0	98.978	0	0	0	0	0	0	0	0	0	0	0	0	2
GCA_001353295.1	USFL197	99.882	99.874	0	0	0	0	98.978	0	0	0	0	0	0	0	0	0	0	0	0	2
GCA_001353315.1	USFL217	99.882	99.874	0	0	0	0	98.978	0	0	0	0	0	0	0	0	0	0	0	0	2
GCA_001353355.1	USFL266	99.882	99.874	0	0	0	0	98.978	0	0	0	0	0	0	99.928	0	0	0	0	0	3
GCA_001353395.1	USFL042	99.882	99.874	0	0	0	0	98.978	0	0	0	0	0	0	0	0	0	0	0	0	2
GCA_001353415.1	USFL110	99.882	99.874	0	0	0	0	98.978	0	0	0	0	0	0	0	0	0	0	0	0	2
GCA_001353435.1	USFL166	99.882	99.874	0	0	0	0	98.978	0	0	0	0	0	0	0	0	0	0	0	0	2
GCA_001353455.1	USFL127	99.882	99.874	0	0	0	0	98.978	0	0	0	0	0	0	0	0	0	0	0	0	2
GCA_001353495.1	USFL107	99.882	99.874	0	0	0	0	98.978	0	0	0	0	0	0	0	0	0	0	0	0	2
GCA_001353535.1	USFL163	99.882	99.874	0	0	0	0	98.978	0	0	0	0	0	0	0	0	0	0	0	0	2
GCA_001353555.1	USFL095	99.882	99.874	0	0	0	0	98.978	0	0	0	0	0	0	0	0	0	0	0	0	2
GCA_001353595.1	USFL169	99.882	100	0	0	0	0	98.978	0	0	0	0	0	0	0	0	0	0	0	0	2
GCA_001353615.1	USFL096	99.882	99.874	0	0	0	0	98.978	0	0	0	0	0	0	0	0	0	0	0	0	2
GCA_001353635.1	USFL111	99.882	99.874	0	0	0	0	98.978	0	0	0	0	0	0	0	0	0	0	0	0	2
GCA_001353655.1	USFL168	99.882	99.874	0	0	0	0	98.978	0	0	0	0	0	0	0	0	0	0	0	0	2
GCA_001353675.1	USFL167	99.882	99.874	0	0	0	0	98.978	0	0	0	0	0	0	0	0	0	0	0	0	2
GCA_001353715.1	USFL098	99.882	99.874	0	0	0	0	98.978	0	0	0	0	0	0	0	0	0	0	0	0	2
GCA_001353735.1	USFL154	99.882	99.874	0	0	0	0	98.978	0	0	0	0	0	0	0	0	0	0	0	0	2
GCA_001353755.1	USFL117	99.882	99.874	0	0	0	0	98.978	0	0	0	0	0	0	0	0	0	0	0	0	2
GCA_001353775.1	USFL147	99.882	99.874	0	0	0	0	98.909	0	0	0	0	0	0	0	0	0	0	0	0	2
GCA_001353795.1	USFL157	99.882	99.874	0	0	0	0	98.978	0	0	0	0	0	0	0	0	0	0	0	0	2
GCA_001353835.1	USFL156	99.882	99.874	0	0	0	0	98.978	0	0	0	0	0	0	0	0	0	0	0	0	2
GCA_001353855.1	USFL137	99.882	99.748	0	0	0	0	98.978	0	0	0	0	0	0	0	0	0	0	0	0	2
GCA_001353875.1	USFL174	99.882	100	0	0	0	0	98.978	0	0	0	0	0	0	0	0	0	0	0	0	2
GCA_001353895.1	USFL173	99.882	99.874	0	0	0	0	98.978	0	0	0	0	0	0	0	0	0	0	0	0	2
GCA_001353915.1	USFL116	99.882	99.874	0	0	0	0	98.978	0	0	0	0	0	0	0	0	0	0	0	0	2
GCA_001353935.1	USFL115	99.882	99.874	0	0	0	0	98.978	0	0	0	0	0	0	0	0	0	0	0	0	2
GCA_001353975.1	USFL113	99.882	99.874	0	0	0	0	98.978	0	0	0	0	0	0	0	0	0	0	0	0	2
GCA_001353995.1	USFL134	99.882	99.874	0	0	0	0	98.978	0	0	0	0	0	0	0	0	0	0	0	0	2
GCA_001354015.1	USFL114	99.95	0	0	0	0	0	0	0	0	0	0	0	0	0	0	0	0	0	0	0
GCA_001354035.1	USFL171	99.882	99.874	0	0	0	0	98.978	0	0	0	0	0	0	0	0	0	0	0	0	2
GCA_001354055.1	USFL182	99.882	99.874	0	0	0	0	98.978	0	0	0	0	0	0	99.928	0	0	0	0	0	3
GCA_001354095.1	USFL103	99.882	99.874	0	0	0	0	98.978	0	0	0	0	0	0	0	0	0	0	0	0	2
GCA_001354115.1	USFL181	99.882	99.874	0	0	0	0	98.978	0	0	0	0	0	0	0	0	0	0	0	0	2
GCA_001354135.1	USFL132	99.882	99.874	0	0	0	0	98.978	0	0	0	0	0	0	0	0	0	0	0	0	2
GCA_001354155.1	USFL102	99.882	99.874	0	0	0	0	98.978	0	0	0	0	0	0	0	0	0	0	0	0	2
GCA_001354175.1	USFL178	99.882	99.874	0	0	0	0	98.978	0	0	0	0	0	0	0	0	0	0	0	0	2
GCA_001354195.1	USFL179	99.882	99.874	0	0	0	0	98.978	0	0	0	0	0	0	0	0	0	0	0	0	2
GCA_001354215.1	USFL119	99.882	99.874	0	0	0	0	98.978	0	0	0	0	0	0	0	0	0	0	0	0	2
GCA_001354235.1	USFL140	99.882	99.874	0	0	0	0	98.978	0	0	0	0	0	0	0	0	0	0	0	0	2
GCA_001354255.1	USFL106	99.882	99.874	0	0	0	0	98.978	0	0	0	0	0	0	0	0	0	0	0	0	2
GCA_001354275.1	USFL105	99.95	0	0	0	0	0	99.184	0	0	0	0	0	0	0	0	0	0	0	0	1
GCA_001354295.1	USFL162	99.882	99.874	0	0	0	0	99.456	0	0	0	0	0	0	99.375	0	0	0	0	0	3
GCA_001354435.1	FL390	99.882	99.874	0	0	0	0	98.978	0	0	0	0	0	0	0	0	0	0	0	0	2
GCA_001354535.1	FL365	99.95	0	0	0	0	0	99.184	0	0	0	0	0	0	0	0	0	0	0	0	1
GCA_001448005.1	MRSA_S8	99.882	99.874	0	0	0	0	98.978	0	0	0	0	0	0	0	0	0	0	0	0	2
GCA_001448035.1	MRSA_S4	99.882	99.874	0	0	0	0	98.978	0	0	0	0	0	0	0	0	0	0	0	0	2
GCA_001448075.1	MRSA_S10	99.882	99.874	0	0	0	0	98.978	0	0	0	0	0	0	0	0	0	0	0	0	2
GCA_001448155.1	MRSA_S18	99.882	99.874	0	0	0	0	98.978	0	0	0	0	0	0	0	0	0	0	0	0	2
GCA_001448175.1	MRSA_S22	99.882	0	0	0	0	0	98.978	0	0	0	0	0	0	0	0	0	0	0	0	1
GCA_001448185.1	MRSA_S23	99.95	0	0	0	0	0	0	0	0	0	0	0	0	0	0	0	0	0	0	0
GCA_001448255.1	MRSA_S12	99.882	0	0	0	0	0	0	0	0	0	0	0	0	0	0	0	0	0	0	0
GCA_001448285.1	MRSA_S28	99.882	99.874	0	0	0	0	98.978	0	0	0	0	0	0	0	0	0	0	0	0	2
GCA_001448345.1	MRSA_S21	99.882	100	0	0	0	0	99.048	0	0	0	0	0	0	100	0	0	0	0	0	3
GCA_001453965.1	MRSA_CVMN27231PS	99.882	99.874	0	0	0	0	98.978	0	0	0	0	0	0	0	0	0	0	0	0	2
GCA_001453995.1	MRSA_CVMN26035PS	99.95	0	0	0	0	0	0	0	0	0	0	0	0	0	0	0	0	0	0	0
GCA_001457095.1	MRSA_S5	99.882	99.874	0	0	0	0	98.978	0	0	0	0	0	0	99.928	0	0	0	0	0	3
GCA_001457185.1	MRSA_S20	99.882	99.874	0	0	0	0	98.978	0	0	0	0	0	0	0	100	0	0	0	0	3
GCA_001468765.1	45778	99.882	99.874	0	0	0	0	98.978	0	0	0	0	0	0	0	0	0	0	0	0	2
GCA_001471675.2	FDAARGOS_169	99.95	99.874	0	0	0	0	0	0	0	0	0	0	0	0	0	0	0	0	0	1
GCA_001471695.2	FDAARGOS_135	99.95	100	0	0	0	0	0	0	0	0	0	0	0	0	0	0	0	0	0	1
GCA_001735645.2	1626.C01	99.882	99.874	0	0	0	0	98.978	0	0	0	0	0	0	0	0	0	0	0	0	2
GCA_001996625.1	DAR6247	99.95	99.719	0	0	0	0	99.593	0	0	0	0	0	0	0	0	0	0	0	0	2
GCA_002085545.1	MEH7	99.882	99.874	0	0	0	0	98.978	0	0	0	0	0	0	0	0	0	0	0	0	2
GCA_002085555.1	MEH1	99.882	99.874	0	0	0	0	98.978	0	0	0	0	0	0	0	0	0	0	0	0	2
GCA_002209825.1	H5/16	99.882	0	0	0	0	0	98.978	0	0	0	0	0	0	0	0	0	0	0	0	1
GCA_002209835.1	H4/16	99.882	99.874	0	0	0	0	98.978	0	0	0	0	0	0	0	0	0	0	0	0	2
GCA_002209885.1	W1	99.882	0	0	0	0	0	98.978	0	0	0	0	0	0	0	0	0	0	0	0	1
GCA_002209895.1	H2/16	99.882	99.874	0	0	0	0	98.978	0	0	0	0	0	0	0	0	0	0	0	0	2
GCA_002209905.1	H8/16	99.882	99.874	0	0	0	0	98.909	0	0	0	0	0	0	0	0	0	0	0	0	2
GCA_002209945.1	H3/16	99.882	0	0	0	0	0	98.978	0	0	0	0	0	0	0	0	0	0	0	0	1
GCA_002209955.1	H1/16	99.882	99.874	0	0	0	0	98.978	0	0	0	0	0	0	0	0	0	0	0	0	2
GCA_002250785.1	ABOJE	99.882	0	0	0	0	0	98.978	0	0	0	0	0	0	0	0	0	0	0	0	1
GCA_002260365.1	UV695	97.991	0	0	0	0	0	98.444	0	0	0	0	0	0	100	0	0	0	0	0	2
GCA_002260455.1	UMX773	99.882	99.874	0	0	0	0	98.978	0	0	0	0	0	0	0	0	0	0	0	0	2
GCA_002260505.1	UV699	99.95	0	0	0	0	0	0	0	0	0	0	0	0	0	0	0	0	0	0	0
GCA_002267155.1	UV170	97.991	0	0	0	0	0	0	0	0	0	0	0	0	0	0	0	0	0	0	0
GCA_002267775.1	UMX750	99.95	0	0	0	0	0	99.048	0	0	0	0	0	0	0	0	0	0	0	0	1
GCA_002267925.1	UV1151	97.991	0	0	0	0	0	0	0	0	0	0	0	0	0	0	0	0	0	0	0
GCA_002267985.1	UMX772	99.882	99.874	0	0	0	0	98.978	0	0	0	0	0	0	0	0	0	0	0	0	2
GCA_002738585.1	smg11	98.463	100	0	0	0	0	0	0	0	0	0	0	0	0	0	0	0	0	0	1
GCA_002909315.1	13C	99.95	0	0	0	0	0	0	0	0	0	0	0	0	0	0	0	0	0	0	0
GCA_002909325.1	LAC	99.882	99.874	0	0	0	0	98.978	0	0	0	0	0	0	0	0	0	0	0	0	2
GCA_002983255.1	Case2_N13c	99.882	99.874	0	0	0	0	98.978	0	0	0	0	0	0	0	0	0	0	0	0	2
GCA_002983275.1	Case2_N13a	99.882	99.874	0	0	0	0	98.978	0	0	0	0	0	0	0	0	0	0	0	0	2
GCA_002983295.1	Case2_N13b	99.882	99.874	0	0	0	0	98.978	0	0	0	0	0	0	0	0	0	0	0	0	2
GCA_002983315.1	Case2_B0	99.882	99.874	0	0	0	0	98.978	0	0	0	0	0	0	0	0	0	0	0	0	2
GCA_002983335.1	Case1_N15c	99.882	99.874	0	0	0	0	98.978	0	0	0	0	0	0	0	0	0	0	0	0	2
GCA_002983355.1	Case1_N15b	99.882	99.874	0	0	0	0	98.978	0	0	0	0	0	0	0	0	0	0	0	0	2
GCA_002983375.1	Case1_N15a	99.882	99.874	0	0	0	0	98.978	0	0	0	0	0	0	0	0	0	0	0	0	2
GCA_002983395.1	Case1_N11	99.882	99.874	0	0	0	0	98.978	0	0	0	0	0	0	0	0	0	0	0	0	2
GCA_002983415.1	Case1_N0c	99.882	99.874	0	0	0	0	98.978	0	0	0	0	0	0	0	0	0	0	0	0	2
GCA_002983425.1	Case1_N0b	99.882	99.874	0	0	0	0	98.978	0	0	0	0	0	0	0	0	0	0	0	0	2
GCA_002983455.1	Case1_N0a	99.882	99.874	0	0	0	0	98.978	0	0	0	0	0	0	0	0	0	0	0	0	2
GCA_003038535.1	SAM-13	0	0	0	0	0	0	0	0	0	0	0	0	0	0	0	0	0	0	0	0
GCA_003237045.1	CM157	97.991	0	0	0	0	0	0	0	0	0	0	0	0	0	0	0	0	0	0	0
GCA_003237825.1	CM181	97.991	0	0	0	0	0	0	0	0	0	0	0	0	0	0	0	0	0	0	0
GCA_003237895.1	CM167	97.991	0	0	0	0	0	0	0	0	0	0	0	0	0	0	0	0	0	0	0
GCA_003239365.1	CM111	99.882	99.874	0	0	0	0	98.444	0	0	0	0	0	0	0	0	0	0	0	0	2
GCA_003239455.1	CM94	97.991	0	0	0	0	0	0	0	0	0	0	0	0	0	0	0	0	0	0	0
GCA_003239465.1	CM95	97.991	0	0	0	0	0	0	0	0	0	0	0	0	0	0	0	0	0	0	0
GCA_003353205.1	MI18-1505	99.882	99.874	0	0	0	0	98.978	0	0	0	0	0	0	0	0	0	0	0	0	2
GCA_003571175.1	STV600L	97.991	0	0	0	0	0	0	0	0	0	0	0	0	0	0	0	0	0	0	0
GCA_003571195.1	STV232L	99.882	99.874	0	0	0	0	98.978	0	0	0	0	0	0	0	0	0	0	0	0	2
GCA_003571315.1	STV915L	99.882	99.874	0	0	0	0	98.978	0	0	0	0	0	0	0	0	0	0	0	0	2
GCA_003571335.1	STV262L	99.764	99.874	0	0	0	0	98.978	0	0	0	0	0	0	0	0	0	0	0	0	2
GCA_003571365.1	STV108L	99.882	99.874	0	0	0	0	98.978	0	0	0	0	0	0	0	100	0	0	0	0	3
GCA_003719935.1	JE2	99.95	0	0	0	0	0	0	0	0	0	0	0	0	0	0	0	0	0	0	0
GCA_003720055.1	CFBR-316	99.882	99.748	0	0	0	0	98.978	0	0	0	0	0	0	0	0	0	0	0	0	2
GCA_003720075.1	CFBR-487	99.882	99.874	0	0	0	0	98.978	0	0	0	0	0	0	0	0	0	0	0	0	2
GCA_003720195.1	CFBR-120	98.227	100	0	0	0	0	100	0	0	0	0	0	0	0	0	0	0	0	0	2
GCA_003720295.1	CFBR-447	99.882	100	0	0	0	0	98.978	0	0	0	0	0	0	0	0	0	0	0	0	2
GCA_003720535.1	CFBR-429	99.882	99.874	0	0	0	0	98.978	0	0	0	0	0	0	0	0	0	0	0	0	2
GCA_003720545.1	CFBR-515	99.882	99.874	0	0	0	0	98.978	0	0	0	0	0	0	0	0	0	0	0	0	2
GCA_003720575.1	CFBR-314	99.882	99.874	0	0	0	0	98.978	0	0	0	0	0	0	0	0	0	0	0	0	2
GCA_003721195.1	CFBR-487	99.882	99.874	0	0	0	0	98.978	0	0	0	0	0	0	0	0	0	0	0	0	2
GCA_900035915.1	st699	99.882	99.874	0	0	0	0	98.978	0	0	0	0	0	0	0	0	0	0	0	0	2
GCA_900051345.1	st3103	99.882	99.874	0	0	0	0	98.978	0	0	100	0	0	0	0	0	0	0	0	0	3
GCA_900233935.1	Gabon_2009_1	99.882	99.874	0	0	0	0	98.978	0	0	0	0	0	0	99.928	0	0	0	0	0	3
GCA_900457325.1	NCTC13812	99.882	99.874	0	0	0	0	98.444	0	0	0	0	0	0	0	0	0	0	0	0	2
GCA_900458295.1	NCTC12232	97.991	100	0	0	0	0	99.863	0	0	0	0	0	0	0	0	0	0	0	0	2
GCA_000723965.1	MV8	99.882	99.874	0	0	0	0	98.978	0	0	0	0	0	0	0	0	0	0	0	0	2
GCA_001046035.1	V1859	97.991	0	0	0	0	0	99.046	0	0	0	0	0	0	100	0	0	0	0	0	2
GCA_001060615.1	1229_SAUR	99.882	99.874	0	0	0	0	99.048	0	0	0	0	0	0	0	0	0	0	0	0	2
GCA_001060795.1	1283_SAUR	99.882	99.874	0	0	0	0	98.978	0	0	0	0	0	0	0	0	0	0	0	0	2
GCA_001061385.1	1266_SAUR	99.882	99.874	0	0	0	0	98.978	0	0	0	0	0	0	0	0	0	0	0	0	2
GCA_001062965.1	218_SAUR	99.95	0	0	0	0	0	98.444	0	0	0	0	0	0	0	0	0	0	0	0	1
GCA_001063955.1	192_SAUR	99.882	0	0	0	0	0	98.444	0	0	0	0	0	0	0	0	0	0	0	0	1
GCA_001064135.1	251_SAUR	99.882	99.874	0	0	0	0	98.978	0	0	0	0	0	0	0	0	0	0	0	0	2
GCA_001064555.1	326_SAUR	99.882	0	0	0	0	0	0	0	0	0	0	0	0	0	0	0	0	0	0	0
GCA_001065595.1	602_SAUR	99.882	99.874	0	0	0	0	98.978	0	0	0	0	0	0	0	0	0	0	0	0	2
GCA_001066425.1	815_SAUR	99.882	99.874	0	0	0	0	98.978	0	0	0	0	0	0	0	0	0	0	0	0	2
GCA_001068265.1	956_SAUR	99.764	0	0	0	0	0	99.184	0	0	0	0	0	0	0	0	0	0	0	0	1
GCA_001076515.1	478_SAUR	99.882	99.874	0	0	0	0	98.978	0	0	0	0	0	0	0	0	0	0	0	0	2
GCA_001191895.1	USFL024	99.882	99.874	0	0	0	0	98.978	0	0	0	0	0	0	0	0	0	0	0	0	2
GCA_001192095.1	FL358	99.882	99.874	0	0	0	0	98.978	0	0	0	0	0	0	0	0	0	0	0	0	2
GCA_001192155.1	FL392	99.882	99.874	0	0	0	0	98.978	0	0	0	0	0	0	0	0	0	0	0	0	2
GCA_001192675.1	USFL204	99.882	99.874	0	0	0	0	98.978	0	0	0	0	0	0	0	0	0	0	0	0	2
GCA_001194525.1	FL376	99.882	99.874	0	0	0	0	98.978	0	0	0	0	0	0	0	0	0	0	0	0	2
GCA_001194825.1	FL368	99.882	99.874	0	0	0	0	98.978	0	0	0	0	0	0	0	0	0	0	0	0	2
GCA_001196435.1	FL363	99.882	99.874	0	0	0	0	98.978	0	0	0	0	0	0	0	0	0	0	0	0	2
GCA_001198115.1	FL384	99.882	99.874	0	0	0	0	98.978	0	0	0	0	0	0	0	0	0	0	0	0	2
GCA_001200635.1	FL391	99.882	99.874	0	0	0	0	98.978	0	0	0	0	0	0	0	0	0	0	0	0	2
GCA_001200875.1	FL367	99.95	0	0	0	0	0	99.184	0	0	0	0	0	0	0	0	0	0	0	0	1
GCA_001201615.1	FL370	99.882	99.874	0	0	0	0	98.978	0	0	0	0	0	0	0	0	0	0	0	0	2
GCA_001202595.1	FL356	99.882	99.874	0	0	0	0	98.978	0	0	0	0	0	0	0	0	0	0	0	0	2
GCA_001204955.1	FL371	97.991	0	0	0	0	0	0	0	0	0	0	0	0	0	0	0	0	0	0	0
GCA_001205315.1	FL366	99.95	0	0	0	0	0	99.046	0	0	0	0	0	0	0	0	0	0	0	0	1
GCA_001206395.1	FL393	99.882	99.874	0	0	0	0	98.978	0	0	0	0	0	0	0	0	0	0	0	0	2
GCA_001207535.1	FL389	99.882	99.874	0	0	0	0	98.978	0	0	0	0	0	0	0	0	0	0	0	0	2
GCA_001208805.1	USFL298	99.882	99.874	0	0	0	0	98.978	0	0	0	0	0	0	0	0	0	0	0	0	2
GCA_001210685.1	FL359	99.882	99.874	0	0	0	0	98.978	0	0	0	0	0	0	0	0	0	0	0	0	2
GCA_001210725.1	FL383	99.882	99.874	0	0	0	0	98.978	0	0	0	0	0	0	0	0	0	0	0	0	2
GCA_001211065.1	FL364	99.882	99.874	0	0	0	0	98.978	0	0	0	0	0	0	0	0	0	0	0	0	2
GCA_001211625.1	USFL016	99.882	99.874	0	0	0	0	98.978	0	0	0	0	0	0	0	0	0	0	0	0	2
GCA_001212385.1	FL377	99.882	99.874	0	0	0	0	98.978	0	0	0	0	0	0	0	0	0	0	0	0	2
GCA_001212665.1	FL360	99.882	99.874	0	0	0	0	98.978	0	0	0	0	0	0	0	0	0	0	0	0	2
GCA_001262175.1	USFL297	99.882	99.874	0	0	0	0	98.978	0	0	0	0	0	0	0	0	0	0	0	0	2
GCA_001262215.1	FL379	99.882	99.874	0	0	0	0	98.978	0	0	0	0	0	0	0	0	0	0	0	0	2
GCA_001287505.1	2588STDY5627524	99.882	99.874	0	0	0	0	98.978	0	0	0	0	0	0	0	0	0	0	0	0	2
GCA_001287525.1	2588STDY5748538	99.882	99.874	0	0	0	0	98.978	0	0	0	0	0	0	0	0	0	0	0	0	2
GCA_001287545.1	2588STDY5748123	99.882	0	0	0	0	0	0	0	0	0	0	0	0	0	0	0	0	0	0	0
GCA_001287565.1	2588STDY5748861	99.882	99.874	0	0	0	0	98.978	0	0	0	0	0	0	0	0	0	0	0	0	2
GCA_001287585.1	2588STDY5748912	99.882	99.874	0	0	0	0	98.978	0	0	0	0	0	0	0	0	0	0	0	0	2
GCA_001287605.1	2588STDY5748077	97.991	0	0	0	0	0	99.184	0	0	0	0	0	0	0	0	0	0	0	0	1
GCA_001287625.1	2588STDY5748704	99.882	99.874	0	0	0	0	98.978	0	0	0	0	0	0	99.928	0	0	0	0	0	3
GCA_001287645.1	2588STDY5748520	99.882	99.874	0	0	0	0	99.184	0	0	0	0	0	0	0	0	0	0	0	0	2
GCA_001287665.1	2588STDY5748506	99.882	99.874	0	0	0	0	98.978	0	0	0	0	0	0	0	0	0	0	0	0	2
GCA_001287705.1	2588STDY5627566	99.882	99.874	0	0	0	0	98.978	0	0	0	0	0	0	0	0	0	0	0	0	2
GCA_001287725.1	2588STDY5627601	99.882	99.874	0	0	0	0	98.978	0	0	0	0	0	0	0	0	0	0	0	0	2
GCA_001287745.1	2588STDY5748644	99.882	99.874	0	0	0	0	98.978	0	0	0	0	0	0	0	0	0	0	0	0	2
GCA_001287765.1	2588STDY5748648	99.882	100	0	0	0	0	0	0	0	0	0	0	0	0	0	0	0	0	0	1
GCA_001287805.1	2588STDY5748917	99.882	99.874	0	0	0	0	98.978	0	0	0	0	0	0	0	0	0	0	0	0	2
GCA_001287825.1	2588STDY5763951	0	0	0	0	0	0	0	0	0	0	0	0	0	0	0	0	0	0	0	0
GCA_001287845.1	2588STDY5748116	0	0	0	0	0	0	0	0	0	0	0	0	0	0	0	0	0	0	0	0
GCA_001287865.1	2588STDY5748560	99.882	99.874	0	0	0	0	98.978	0	0	0	0	0	0	0	0	0	0	0	0	2
GCA_001287885.1	2588STDY5748703	99.882	99.874	0	0	0	0	98.978	0	0	0	0	0	0	0	0	0	0	0	0	2
GCA_001287905.1	2588STDY5748759	99.882	99.874	0	0	0	0	100	0	0	0	0	0	0	0	0	0	0	0	0	2
GCA_001287925.1	2588STDY5748954	99.882	100	0	0	0	0	98.978	0	0	0	0	0	0	0	0	0	0	0	0	2
GCA_001287945.1	2588STDY5748872	99.882	99.874	0	0	0	0	98.978	0	0	0	0	0	0	0	0	0	0	0	0	2
GCA_001287965.1	2588STDY5748751	99.882	99.874	0	0	0	0	98.978	0	0	0	0	0	0	99.928	0	0	0	0	0	3
GCA_001288005.1	2588STDY5748552	99.882	99.874	0	0	0	0	98.978	0	0	0	0	0	0	0	0	0	0	0	0	2
GCA_001288045.1	2588STDY5748718	99.882	99.874	0	0	0	0	98.978	0	0	0	0	0	0	0	0	0	0	0	0	2
GCA_001288065.1	2588STDY5748481	99.882	0	0	0	0	0	0	0	0	0	0	0	0	0	0	0	0	0	0	0
GCA_001288105.1	2588STDY5764014	99.882	99.874	0	0	0	0	98.978	0	0	0	0	0	0	0	0	0	0	0	0	2
GCA_001288125.1	2588STDY5748933	99.882	99.874	0	0	0	0	98.978	0	0	0	0	0	0	0	0	0	0	0	0	2
GCA_001288185.1	2588STDY5748696	99.882	99.874	0	0	0	0	98.978	0	0	0	0	0	0	0	0	0	0	0	0	2
GCA_001288205.1	2588STDY5748882	99.882	99.874	0	0	0	0	98.978	0	0	0	0	0	0	0	0	0	0	0	0	2
GCA_001288225.1	2588STDY5748102	99.882	99.874	0	0	0	0	98.978	0	0	0	0	0	0	0	0	0	0	0	0	2
GCA_001288245.1	2588STDY5748680	99.882	99.874	0	0	0	0	98.978	0	0	0	0	0	0	0	0	0	0	0	0	2
GCA_001288265.1	2588STDY5748940	99.882	99.874	0	0	0	0	98.978	0	0	0	0	0	0	0	0	0	0	0	0	2
GCA_001288305.1	2588STDY5748581	99.882	0	0	0	0	0	98.444	0	0	0	0	0	0	0	0	0	0	0	0	1
GCA_001288325.1	2588STDY5748867	99.882	0	0	0	0	0	98.978	0	0	0	0	0	0	0	0	0	0	0	0	1
GCA_001288365.1	2588STDY5748735	99.882	99.874	0	0	0	0	98.909	0	0	0	0	0	0	0	0	0	0	0	0	2
GCA_001288405.1	2588STDY5748187	0	0	0	0	0	0	0	0	0	0	0	0	0	0	0	0	0	0	0	0
GCA_001288425.1	2588STDY5763864	99.882	99.874	0	0	0	0	98.978	0	0	0	0	0	0	0	0	0	0	0	0	2
GCA_001288485.1	2588STDY5627558	99.95	0	0	0	0	0	0	0	0	0	0	0	0	0	0	0	0	0	0	0
GCA_001288505.1	2588STDY5627584	99.882	99.874	0	0	0	0	98.978	0	0	0	0	0	0	0	0	0	0	0	0	2
GCA_001288525.1	2588STDY5748761	99.882	99.874	0	0	0	0	98.978	0	0	0	0	0	0	0	0	0	0	0	0	2
GCA_001288545.1	2588STDY5748914	99.882	99.874	0	0	0	0	98.978	0	0	0	0	0	0	0	0	0	0	0	0	2
GCA_001288565.1	2588STDY5748948	99.882	99.874	0	0	0	0	98.978	0	0	0	0	0	0	0	0	0	0	0	0	2
GCA_001288585.1	2588STDY5627519	99.882	99.874	0	0	0	0	98.978	0	0	0	0	0	0	0	0	0	0	0	0	2
GCA_001288605.1	2588STDY5748652	99.882	99.748	0	0	0	0	98.978	0	0	0	0	0	0	99.928	0	0	0	0	0	3
GCA_001288625.1	2588STDY5627575	99.882	99.874	0	0	0	0	98.978	0	0	0	0	0	0	0	0	0	0	0	0	2
GCA_001288645.1	2588STDY5748674	99.882	99.874	0	0	0	0	98.978	0	0	0	0	0	0	0	0	0	0	0	0	2
GCA_001288665.1	2588STDY5627608	99.95	0	0	0	0	0	0	0	0	0	0	0	0	0	0	0	0	0	0	0
GCA_001288685.1	2588STDY5748930	99.882	99.874	0	0	0	0	98.978	0	0	0	0	0	0	0	0	0	0	0	0	2
GCA_001288705.1	2588STDY5627554	99.882	99.874	0	0	0	0	98.978	0	0	0	0	0	0	100	0	0	0	0	0	3
GCA_001288725.1	2588STDY5627551	99.882	99.874	0	0	0	0	98.912	0	0	0	0	0	0	0	0	0	0	0	0	2
GCA_001288745.1	2588STDY5748946	99.882	99.874	0	0	0	0	98.978	0	0	0	0	0	0	0	0	0	0	0	0	2
GCA_001288765.1	2588STDY5748344	99.882	99.874	0	0	0	0	98.978	0	0	0	0	0	0	0	0	0	0	0	0	2
GCA_001288785.1	2588STDY5748178	99.882	99.874	0	0	0	0	98.978	0	0	0	0	0	0	0	0	0	0	0	0	2
GCA_001288805.1	2588STDY5748352	99.882	99.874	0	0	0	0	98.978	0	0	0	0	0	0	0	0	0	0	0	0	2
GCA_001288825.1	2588STDY5748688	99.882	99.874	0	0	0	0	98.978	0	0	0	0	0	0	0	0	0	0	0	0	2
GCA_001288845.1	2588STDY5748945	99.882	100	0	0	0	0	98.978	0	0	0	0	0	0	0	0	0	0	0	0	2
GCA_001288865.1	2588STDY5748530	99.882	99.874	0	0	0	0	98.978	0	0	0	0	0	0	0	0	0	0	0	0	2
GCA_001288905.1	2588STDY5763872	99.882	99.874	0	0	0	0	98.978	0	0	0	0	0	0	0	0	0	0	0	0	2
GCA_001288925.1	2588STDY5748874	99.882	99.874	0	0	0	0	98.978	0	0	0	0	0	0	0	0	0	0	0	0	2
GCA_001288965.1	2588STDY5627542	99.882	99.874	0	0	0	0	98.91	0	0	0	0	0	0	0	0	0	0	0	0	2
GCA_001288985.1	2588STDY5764007	99.882	99.874	0	0	0	0	98.978	0	0	0	0	0	0	99.928	0	0	0	0	0	3
GCA_001289045.1	2588STDY5748898	99.882	100	0	0	0	0	98.978	0	0	0	0	0	0	0	0	0	0	0	0	2
GCA_001289065.1	2588STDY5748908	99.882	99.874	0	0	0	0	98.978	0	0	0	0	0	0	0	0	0	0	0	0	2
GCA_001289085.1	2588STDY5627607	99.882	99.874	0	0	0	0	98.978	0	0	0	0	0	0	0	0	0	0	0	0	2
GCA_001289105.1	2588STDY5748613	99.882	99.874	0	0	0	0	98.978	0	0	0	0	0	0	0	0	0	0	0	0	2
GCA_001289125.1	2588STDY5748027	99.882	99.874	0	0	0	0	98.978	0	0	0	0	0	0	0	0	0	0	0	0	2
GCA_001289145.1	2588STDY5748629	99.882	99.874	0	0	0	0	0	0	0	0	0	0	0	0	0	0	0	0	0	1
GCA_001289185.1	2588STDY5748043	99.882	99.874	0	0	0	0	98.978	0	0	0	0	0	0	0	0	0	0	0	0	2
GCA_001289205.1	2588STDY5748742	99.764	99.874	0	0	0	0	98.978	0	0	0	0	0	0	0	0	0	0	0	0	2
GCA_001289225.1	2588STDY5627599	99.882	99.874	0	0	0	0	98.978	0	0	0	0	0	0	0	0	0	0	0	0	2
GCA_001289245.1	2588STDY5748146	99.882	99.874	0	0	0	0	98.978	0	0	0	0	0	0	0	0	0	0	0	0	2
GCA_001289265.1	2588STDY5627526	99.882	99.874	0	0	0	0	98.978	0	0	0	0	0	0	0	0	0	0	0	0	2
GCA_001289285.1	2588STDY5748368	99.882	99.874	0	0	0	0	98.978	0	0	0	0	0	0	0	0	0	0	0	0	2
GCA_001289305.1	2588STDY5748385	99.882	99.874	0	0	0	0	98.978	0	0	0	0	0	0	0	0	0	0	0	0	2
GCA_001289325.1	2588STDY5748758	99.882	99.874	0	0	0	0	98.978	0	0	0	0	0	0	0	0	0	0	0	0	2
GCA_001289345.1	2588STDY5627605	99.882	99.874	0	0	0	0	98.978	0	0	0	0	0	0	0	0	0	0	0	0	2
GCA_001289365.1	2588STDY5748528	99.882	99.874	0	0	0	0	98.909	0	0	0	0	0	0	0	0	0	0	0	0	2
GCA_001289385.1	2588STDY5748726	99.882	99.874	0	0	0	0	98.978	0	0	0	0	0	0	0	0	0	0	0	0	2
GCA_001289425.1	2588STDY5748790	99.882	99.874	0	0	0	0	98.978	0	0	0	0	0	0	0	0	0	0	0	0	2
GCA_001289465.1	2588STDY5748154	99.882	0	0	0	0	0	0	0	0	0	0	0	0	0	0	0	0	0	0	0
GCA_001289485.1	2588STDY5747536	99.882	99.874	0	0	0	0	98.978	0	0	0	0	0	0	0	0	0	0	0	0	2
GCA_001289505.1	2588STDY5748687	99.882	99.874	0	0	0	0	98.978	0	0	0	0	0	0	0	0	0	0	0	0	2
GCA_001289525.1	2588STDY5748711	99.882	99.874	0	0	0	0	98.978	0	0	0	0	0	0	0	0	0	0	0	0	2
GCA_001289565.1	2588STDY5748019	99.882	99.874	0	0	0	0	98.978	0	0	0	0	0	0	0	0	0	0	0	0	2
GCA_001289585.1	2588STDY5748497	99.882	99.874	0	0	0	0	98.978	0	0	0	0	0	0	0	0	0	0	0	0	2
GCA_001289625.1	2588STDY5627574	99.95	0	0	0	0	0	0	0	0	0	0	0	0	0	0	0	0	0	0	0
GCA_001289645.1	2588STDY5748011	99.882	99.874	0	0	0	0	98.978	0	0	0	0	0	0	0	0	0	0	0	0	2
GCA_001289685.1	2588STDY5627546	99.882	99.874	0	0	0	0	98.978	0	0	0	0	0	0	0	0	0	0	0	0	2
GCA_001289705.1	2588STDY5748743	99.882	99.874	0	0	0	0	98.978	0	0	0	0	0	0	0	0	0	0	0	0	2
GCA_001289725.1	2588STDY5748640	99.882	99.874	0	0	0	0	98.978	0	0	0	0	0	0	0	0	0	0	0	0	2
GCA_001289745.1	2588STDY5748928	99.882	99.874	0	0	0	0	98.978	0	0	0	0	0	0	0	0	0	0	0	0	2
GCA_001289765.1	2588STDY5748448	99.882	99.874	0	0	0	0	98.978	0	0	0	0	0	0	99.928	0	0	0	0	0	3
GCA_001289785.1	2588STDY5748890	99.882	99.874	0	0	0	0	98.976	0	0	0	0	0	0	0	0	0	0	0	0	2
GCA_001289805.1	2588STDY5748727	99.882	99.874	0	0	0	0	98.978	0	0	0	0	0	0	0	0	0	0	0	0	2
GCA_001289865.1	2588STDY5627537	99.764	99.874	0	0	0	0	98.978	0	0	0	0	0	0	0	0	0	0	0	0	2
GCA_001289885.1	2588STDY5627606	99.882	99.874	0	0	0	0	98.978	0	0	0	0	0	0	0	0	0	0	0	0	2
GCA_001289945.1	2588STDY5748617	99.882	99.874	0	0	0	0	98.978	0	0	0	0	0	0	0	0	0	0	0	0	2
GCA_001289965.1	2588STDY5748313	99.882	99.874	0	0	0	0	98.978	0	0	0	0	0	0	0	0	0	0	0	0	2
GCA_001289985.1	2588STDY5748155	0	0	0	0	0	0	0	0	0	0	0	0	0	0	0	0	0	0	0	0
GCA_001290005.1	2588STDY5748888	99.882	99.874	0	0	0	0	98.978	0	0	0	0	0	0	0	0	0	0	0	0	2
GCA_001290025.1	2588STDY5748853	99.882	99.874	0	0	0	0	98.978	0	0	0	0	0	0	0	0	0	0	0	0	2
GCA_001290045.1	2588STDY5763904	99.882	99.874	0	0	0	0	98.978	0	0	0	0	0	0	0	0	0	0	0	0	2
GCA_001290065.1	2588STDY5627610	99.882	99.874	0	0	0	0	98.978	0	0	0	0	0	0	0	0	0	0	0	0	2
GCA_001290085.1	2588STDY5748035	99.882	99.874	0	0	0	0	98.978	0	0	0	0	0	0	0	0	0	0	0	0	2
GCA_001290125.1	2588STDY5748512	99.882	99.874	0	0	0	0	98.978	0	0	0	0	0	0	0	0	0	0	0	0	2
GCA_001290165.1	2588STDY5748496	99.882	99.874	0	0	0	0	98.978	0	0	0	0	0	0	0	0	0	0	0	0	2
GCA_001290185.1	2588STDY5748186	99.882	99.874	0	0	0	0	98.978	0	0	0	0	0	0	100	0	0	0	0	0	3
GCA_001290225.1	2588STDY5748164	99.882	99.874	0	0	0	0	98.978	0	0	0	0	0	0	0	0	0	0	0	0	2
GCA_001290245.1	2588STDY5748631	99.882	99.874	0	0	0	0	98.978	0	0	0	0	0	0	0	0	0	0	0	0	2
GCA_001290265.1	2588STDY5627594	99.882	99.874	0	0	0	0	98.978	0	0	0	0	0	0	0	0	0	0	0	0	2
GCA_001290285.1	2588STDY5748904	99.882	99.874	0	0	0	0	98.978	0	0	0	0	0	0	0	0	0	0	0	0	2
GCA_001290305.1	2588STDY5748664	97.991	0	0	0	0	0	99.184	0	0	0	0	0	0	0	0	0	0	0	0	1
GCA_001290325.1	2588STDY5627533	99.882	99.874	0	0	0	0	98.978	0	0	0	0	0	0	0	0	0	0	0	0	2
GCA_001290345.1	2588STDY5747542	99.95	100	0	0	0	0	0	0	0	0	0	0	0	100	0	0	0	0	0	2
GCA_001290365.1	2588STDY5748920	99.882	99.874	0	0	0	0	98.978	0	0	0	0	0	0	0	0	0	0	0	0	2
GCA_001290385.1	2588STDY5748297	99.882	99.874	0	0	0	0	98.978	0	0	0	0	0	0	0	0	0	0	0	0	2
GCA_001290425.1	2588STDY5748891	99.882	99.874	0	0	0	0	98.978	0	0	0	0	0	0	0	0	0	0	0	0	2
GCA_001290445.1	2588STDY5763896	99.882	99.874	0	0	0	0	99.046	0	0	0	0	0	0	0	0	0	0	0	0	2
GCA_001290465.1	2588STDY5748873	99.882	99.874	0	0	0	0	98.978	0	0	0	0	0	0	0	0	0	0	0	0	2
GCA_001290485.1	2588STDY5748328	99.882	99.874	0	0	0	0	99.453	0	0	0	0	0	0	0	0	0	0	0	0	2
GCA_001290505.1	2588STDY5748925	99.882	99.874	0	0	0	0	98.978	0	0	0	0	0	0	0	0	0	0	0	0	2
GCA_001290545.1	2588STDY5748489	99.882	99.874	0	0	0	0	98.978	0	0	0	0	0	0	0	0	0	0	0	0	2
GCA_001290585.1	2588STDY5627590	99.882	99.874	0	0	0	0	98.978	0	0	0	0	0	0	0	0	0	0	0	0	2
GCA_001290605.1	2588STDY5748656	99.882	99.874	0	0	0	0	98.978	0	0	0	0	0	0	0	0	0	0	0	0	2
GCA_001290625.1	2588STDY5748608	99.882	99.874	0	0	0	0	98.978	0	0	0	0	0	0	0	0	0	0	0	0	2
GCA_001290645.1	2588STDY5748737	99.882	99.874	0	0	0	0	98.978	0	0	0	0	0	0	0	0	0	0	0	0	2
GCA_001290665.1	2588STDY5627527	99.882	99.874	0	0	0	0	98.978	0	0	0	0	0	0	0	0	0	0	0	0	2
GCA_001290685.1	2588STDY5748609	99.882	99.874	0	0	0	0	98.978	0	0	0	0	0	0	0	0	0	0	0	0	2
GCA_001290705.1	2588STDY5748139	99.882	99.874	0	0	0	0	98.978	0	0	0	0	0	0	0	0	0	0	0	0	2
GCA_001290745.1	2588STDY5747941	99.882	99.874	0	0	0	0	98.978	0	0	0	0	0	0	99.928	0	0	0	0	0	3
GCA_001290765.1	2588STDY5748702	99.882	99.874	0	0	0	0	98.978	0	0	0	0	0	0	0	0	0	0	0	0	2
GCA_001290785.1	2588STDY5763984	99.882	99.748	0	0	0	0	98.978	0	0	0	0	0	0	0	0	0	0	0	0	2
GCA_001290805.1	2588STDY5748488	99.882	99.874	0	0	0	0	98.978	0	0	0	0	0	0	0	0	0	0	0	0	2
GCA_001290825.1	2588STDY5748138	99.882	99.874	0	0	0	0	98.978	0	0	0	0	0	0	100	0	0	0	0	0	3
GCA_001290845.1	2588STDY5748913	99.882	99.874	0	0	0	0	98.978	0	0	0	0	0	0	0	0	0	0	0	0	2
GCA_001290865.1	2588STDY5627545	99.882	99.874	0	0	0	0	99.184	0	0	0	0	0	0	0	0	0	0	0	0	2
GCA_001290905.1	2588STDY5748114	99.882	99.874	0	0	0	0	98.978	0	0	0	0	0	0	0	0	0	0	0	0	2
GCA_001290925.1	2588STDY5748670	99.882	99.874	0	0	0	0	98.978	0	0	0	0	0	0	0	0	0	0	0	0	2
GCA_001290945.1	2588STDY5748604	99.95	100	0	0	0	0	0	0	0	0	0	0	0	0	0	0	0	0	0	1
GCA_001290965.1	2588STDY5748156	99.882	99.874	0	0	0	0	98.978	0	0	0	0	0	0	0	0	0	0	0	0	2
GCA_001290985.1	2588STDY5748130	99.882	99.874	0	0	0	0	98.773	0	0	0	0	0	0	0	0	0	0	0	0	2
GCA_001291005.1	2588STDY5747973	99.882	99.874	0	0	0	0	98.978	0	0	0	0	0	0	0	0	0	0	0	0	2
GCA_001291045.1	2588STDY5627570	99.882	99.874	0	0	0	0	98.978	0	0	0	0	0	0	0	0	0	0	0	0	2
GCA_001291065.1	2588STDY5748432	99.882	99.874	0	0	0	0	98.978	0	0	0	0	0	0	0	0	0	0	0	0	2
GCA_001291085.1	2588STDY5627528	99.882	99.874	0	0	0	0	98.978	0	0	0	0	0	0	0	0	0	0	0	0	2
GCA_001291105.1	2588STDY5748639	99.882	99.874	0	0	0	0	98.978	0	0	0	0	0	0	0	0	0	0	0	0	2
GCA_001291125.1	2588STDY5627563	99.882	99.874	0	0	0	0	98.978	0	0	0	0	0	0	0	0	0	0	0	0	2
GCA_001291165.1	2588STDY5748124	99.882	99.874	0	0	0	0	98.978	0	0	0	0	0	0	0	0	0	0	0	0	2
GCA_001291185.1	2588STDY5763876	99.882	99.874	0	0	0	0	98.978	0	0	0	0	0	0	0	0	0	0	0	0	2
GCA_001291205.1	2588STDY5748053	99.882	99.874	0	0	0	0	98.978	0	0	0	0	0	0	0	0	0	0	0	0	2
GCA_001291225.1	2588STDY5748695	99.882	99.874	0	0	0	0	98.978	0	0	0	0	0	0	0	0	0	0	0	0	2
GCA_001291245.1	2588STDY5748750	99.882	99.874	0	0	0	0	98.978	0	0	0	0	0	0	0	0	0	0	0	0	2
GCA_001291265.1	2588STDY5748305	99.882	99.874	0	0	0	0	98.978	0	0	0	0	0	0	0	0	0	0	0	0	2
GCA_001291285.1	2588STDY5748589	99.882	99.874	0	0	0	0	98.978	0	0	0	0	0	0	0	0	0	0	0	0	2
GCA_001291325.1	2588STDY5748690	99.882	99.874	0	0	0	0	98.978	0	0	0	0	0	0	0	0	0	0	0	0	2
GCA_001352215.1	USFL341	99.882	99.874	0	0	0	0	98.978	0	0	0	0	0	0	0	0	0	0	0	0	2
GCA_001354075.1	USFL177	99.882	99.874	0	0	0	0	98.978	0	0	0	0	0	0	0	0	0	0	0	0	2
GCA_001354315.1	FL362	99.882	99.874	0	0	0	0	98.978	0	0	0	0	0	0	0	0	0	0	0	0	2
GCA_001354335.1	FL357	99.882	99.874	0	0	0	0	98.978	0	0	0	0	0	0	0	0	0	0	0	0	2
GCA_001354375.1	FL382	99.95	0	0	0	0	0	0	0	0	0	0	0	0	0	0	0	0	0	0	0
GCA_001354415.1	FL378	99.882	99.874	0	0	0	0	98.978	0	0	0	0	0	0	0	0	0	0	0	0	2
GCA_001354455.1	FL388	99.882	99.874	0	0	0	0	98.978	0	0	0	0	0	0	0	0	0	0	0	0	2
GCA_001354475.1	FL386	99.882	99.874	0	0	0	0	98.978	0	0	0	0	0	0	0	0	0	0	0	0	2
GCA_001354495.1	FL387	99.882	99.874	0	0	0	0	98.978	0	0	0	0	0	0	0	0	0	0	0	0	2
GCA_002120665.1	CFSA369	99.882	99.748	0	0	0	0	98.978	0	0	0	0	0	0	0	0	0	0	0	0	2
GCA_002120705.1	CFSA365	99.95	100	0	0	0	0	0	0	0	0	0	0	0	0	0	0	0	0	0	1
GCA_002120715.1	CFSA364	99.882	99.874	0	0	0	0	98.978	0	0	0	0	0	0	0	0	0	0	0	0	2
GCA_002120745.1	CFSA359	99.95	100	0	0	0	0	0	0	0	0	0	0	0	0	0	0	0	0	0	1
GCA_002120755.1	CFSA362	99.882	99.748	0	0	0	0	98.978	0	0	0	0	0	0	0	0	0	0	0	0	2
GCA_002120795.1	CFSA356	99.882	99.874	0	0	0	0	98.978	0	0	0	0	0	0	0	0	0	0	0	0	2
GCA_002120815.1	CFSA355	99.882	99.748	0	0	0	0	98.978	0	0	0	0	0	0	0	0	0	0	0	0	2
GCA_002120885.1	CFSA344	99.882	99.874	0	0	0	0	98.978	0	0	0	0	0	0	0	0	0	0	0	0	2
GCA_002120995.1	CFSA336	99.882	99.874	0	0	0	0	98.909	0	0	0	0	0	0	0	0	0	0	0	0	2
GCA_002121025.1	CFSA335	99.882	99.874	0	0	0	0	98.978	0	0	0	0	0	0	0	0	0	0	0	0	2
GCA_002121065.1	CFSA329	99.882	99.748	0	0	0	0	98.978	0	0	0	0	0	0	0	0	0	0	0	0	2
GCA_002121125.1	CFSA326	99.882	99.874	0	0	0	0	98.978	0	0	0	0	0	0	0	0	0	0	0	0	2
GCA_002121145.1	CFSA323	99.882	99.874	0	0	0	0	98.978	0	0	0	0	0	0	0	0	0	0	0	0	2
GCA_002121245.1	CFSA312	99.882	99.874	0	0	0	0	99.456	0	0	0	0	0	0	99.375	0	0	0	0	0	3
GCA_002121285.1	CFSA311	99.882	99.874	0	0	0	0	98.978	0	0	0	0	0	0	0	0	0	0	0	0	2
GCA_002121385.1	CFSA303	99.882	99.748	0	0	0	0	99.184	0	0	0	0	0	0	0	0	0	0	0	0	2
GCA_002121395.1	CFSA301	99.882	99.874	0	0	0	0	98.978	0	0	0	0	0	0	0	0	0	0	0	0	2
GCA_002121535.1	CFSA295	99.882	99.874	0	0	0	0	98.978	0	0	0	0	0	0	0	0	0	0	0	0	2
GCA_002121555.1	CFSA289	99.882	99.748	0	0	0	0	98.978	0	0	0	0	0	0	0	0	0	0	0	0	2
GCA_002121575.1	CFSA281	99.882	99.748	0	0	0	0	99.184	0	0	0	0	0	0	0	0	0	0	0	0	2
GCA_002121615.1	CFSA283	99.882	0	0	0	0	0	98.422	0	0	0	0	0	0	0	0	0	0	0	0	1
GCA_002121625.1	CFSA280	99.882	99.874	0	0	0	0	98.978	0	0	0	0	0	0	0	0	0	0	0	0	2
GCA_002121705.1	CFSA270	99.882	99.874	0	0	0	0	98.978	0	0	0	0	0	0	0	0	0	0	0	0	2
GCA_002121755.1	CFSA259	99.95	0	0	0	0	0	0	0	0	0	0	0	0	0	0	0	0	0	0	0
GCA_002121775.1	CFSA255	99.95	0	0	0	0	0	0	0	0	0	0	0	0	0	0	0	0	0	0	0
GCA_002121795.1	CFSA257	99.882	99.874	0	0	0	0	99.456	0	0	0	0	0	0	99.375	0	0	0	0	0	3
GCA_002122065.1	CFSA236	99.882	99.874	0	0	0	0	98.978	0	0	0	0	0	0	0	0	0	0	0	0	2
GCA_002122155.1	CFSA363	99.882	99.874	0	0	0	0	98.978	0	0	0	0	0	0	0	0	0	0	0	0	2
GCA_002122205.1	CFSA358	99.95	100	0	0	0	0	0	0	0	0	0	0	0	0	0	0	0	0	0	1
GCA_002122215.1	CFSA361	99.95	100	0	0	0	0	0	0	0	0	0	0	0	0	0	0	0	0	0	1
GCA_002122285.1	CFSA349	99.882	99.874	0	0	0	0	98.978	0	0	0	0	0	0	0	0	100	0	0	0	2
GCA_002122335.1	CFSA341	99.882	0	0	0	0	0	98.422	0	0	0	0	0	0	0	0	0	0	0	0	1
GCA_002122395.1	CFSA340	99.882	99.874	0	0	0	0	99.456	0	0	0	0	0	0	99.375	0	0	0	0	0	3
GCA_002122415.1	CFSA321	99.882	99.748	0	0	0	0	98.978	0	0	0	0	0	0	0	0	0	0	0	0	2
GCA_002122545.1	CFSA300	99.95	100	0	0	0	0	98.978	0	0	0	0	0	0	0	0	0	0	0	0	2
GCA_002122595.1	CFSA297	99.95	0	0	0	0	0	0	0	0	0	0	0	0	0	0	0	0	0	0	0
GCA_002122605.1	CFSA293	99.882	99.748	0	0	0	0	99.184	0	0	0	0	0	0	0	0	0	0	0	0	2
GCA_002122685.1	CFSA285	99.882	99.874	0	0	0	0	98.978	0	0	0	0	0	0	0	0	0	0	0	0	2
GCA_002122745.1	CFSA271	99.95	99.804	0	0	0	0	0	0	0	0	0	0	0	0	0	0	0	0	0	1
GCA_002122805.1	CFSA250	99.882	99.874	0	0	0	0	98.978	0	0	0	0	0	0	0	0	0	0	0	0	2
GCA_002122995.1	CFSA220	99.882	99.874	0	0	0	0	98.978	0	0	0	0	0	0	0	0	0	0	0	0	2
GCA_002123015.1	CFSA219	99.882	99.874	0	0	0	0	98.978	0	0	0	0	0	0	0	0	0	0	0	0	2
GCA_002123095.1	CFSA275	99.882	99.874	0	0	0	0	98.978	0	0	0	0	0	0	0	0	0	0	0	0	2
GCA_002123105.1	CFSA213	99.882	99.874	0	0	0	0	98.978	0	0	0	0	0	0	0	0	0	0	0	0	2
GCA_002123355.1	CFSA196	0	0	0	0	0	0	0	0	0	0	0	0	0	0	0	0	0	0	0	0
GCA_002123375.1	CFSA193	99.882	99.748	0	0	0	0	98.978	0	0	0	0	0	0	0	0	0	0	0	0	2
GCA_002123385.1	CFSA192	99.882	99.748	0	0	0	0	98.978	0	0	0	0	0	0	0	0	0	0	0	0	2
GCA_002123455.1	CFSA170	99.882	99.874	0	0	0	0	98.978	0	0	0	0	0	0	0	0	0	0	0	0	2
GCA_002123545.1	CFSA162	97.872	100	0	0	0	0	99.048	0	0	0	0	0	0	100	0	0	0	0	0	3
GCA_002123785.1	CFSA143	99.882	99.874	0	0	0	0	98.978	0	0	0	0	0	0	0	0	0	0	0	0	2
GCA_002123965.1	CFSA119	99.882	99.874	0	0	0	0	98.978	0	0	0	0	0	0	0	0	0	0	0	0	2
GCA_002124015.1	CFSA115	99.882	99.874	0	0	0	0	98.978	0	0	0	0	0	0	0	0	0	0	0	0	2
GCA_002124055.1	CFSA111	99.95	0	0	0	0	0	0	0	0	0	0	0	0	0	0	0	0	0	0	0
GCA_002124065.1	CFSA105	99.882	0	0	0	0	0	98.978	0	0	0	0	0	0	0	0	0	0	0	0	1
GCA_002124105.1	CFSA103	99.882	99.874	0	0	0	0	98.978	0	0	0	0	0	0	0	0	0	0	0	0	2
GCA_002124195.1	CFSA096	99.882	99.874	0	0	0	0	98.978	0	0	0	0	0	0	0	0	0	0	0	0	2
GCA_002124365.1	CFSA226	99.882	99.874	0	0	0	0	98.978	0	0	0	0	0	0	0	0	0	0	0	0	2
GCA_002124395.1	CFSA222	99.882	99.874	0	0	0	0	98.978	0	0	0	0	0	0	0	0	0	0	0	0	2
GCA_002124455.1	CFSA217	99.882	100	0	0	0	0	98.978	0	0	0	0	0	0	0	0	0	0	0	0	2
GCA_002124475.1	CFSA215	99.95	100	0	0	0	0	0	0	0	0	0	0	0	0	0	0	0	0	0	1
GCA_002124485.1	CFSA209	99.882	99.748	0	0	0	0	98.978	0	0	0	0	0	0	0	0	0	0	0	0	2
GCA_002124515.1	CFSA205	99.882	99.874	0	0	0	0	98.978	0	0	0	0	0	0	0	0	0	0	0	0	2
GCA_002124625.1	CFSA197	99.882	0	0	0	0	0	98.978	0	0	0	0	0	0	0	0	0	0	0	0	1
GCA_002124655.1	CFSA194	99.882	99.748	0	0	0	0	98.978	0	0	0	0	0	0	0	0	0	0	0	0	2
GCA_002124685.1	CFSA169	99.882	0	0	0	0	0	98.422	0	0	0	0	0	0	0	0	0	0	0	0	1
GCA_002124735.1	CFSA166	99.882	99.874	0	0	0	0	98.978	0	0	0	0	0	0	0	0	0	0	0	0	2
GCA_002124755.1	CFSA164	99.882	99.874	0	0	0	0	98.978	0	0	0	0	0	0	100	0	0	0	0	0	3
GCA_002124765.1	CFSA165	99.882	99.874	0	0	0	0	98.978	0	0	0	0	0	0	0	0	0	0	0	0	2
GCA_002124895.1	CFSA151	99.882	99.874	0	0	0	0	98.978	0	0	0	0	0	0	0	0	0	0	0	0	2
GCA_002124945.1	CFSA146	99.882	99.874	0	0	0	0	98.978	0	0	0	0	0	0	0	0	0	0	0	0	2
GCA_002125015.1	CFSA112	99.882	99.874	0	0	0	0	99.456	0	0	0	0	0	0	99.375	0	0	0	0	0	3
GCA_002125045.1	CFSA109	99.882	99.874	0	0	0	0	98.978	0	0	0	0	0	0	0	0	0	0	0	0	2
GCA_002125075.1	CFSA108	99.882	99.874	0	0	0	0	98.978	0	0	0	0	0	0	100	0	0	0	0	0	3
GCA_002125175.1	CFSA091	99.882	99.874	0	0	0	0	98.978	0	0	0	0	0	0	0	0	0	0	0	0	2
GCA_002125235.1	CFSA083	99.882	99.874	0	0	0	0	98.978	0	0	0	0	0	0	0	0	0	0	0	0	2
GCA_002125255.1	CFSA081	99.882	99.874	0	0	0	0	98.978	0	0	0	0	0	0	0	0	0	0	0	0	2
GCA_002125395.1	CFSA050	99.882	99.874	0	0	0	0	98.978	0	0	0	0	0	0	0	0	0	0	0	0	2
GCA_002125525.1	CFSA040	99.882	99.748	0	0	0	0	98.978	0	0	0	0	0	0	0	0	0	0	0	0	2
GCA_002125565.1	CFSA035	99.882	99.874	0	0	0	0	98.978	0	0	0	0	0	0	0	0	0	0	0	0	2
GCA_002125655.1	CFSA029	99.882	99.874	0	0	0	0	98.978	0	0	0	0	0	0	0	0	0	0	0	0	2
GCA_002125715.1	CFSA024	99.882	99.874	0	0	0	0	98.978	0	0	0	0	0	0	0	0	0	0	0	0	2
GCA_002125725.1	CFSA023	99.882	99.874	0	0	0	0	98.978	0	0	0	0	0	0	0	0	0	0	0	0	2
GCA_002125765.1	CFSA020	99.882	99.874	0	0	0	0	98.978	0	0	0	0	0	0	0	0	0	0	0	0	2
GCA_002125795.1	CFSA019	99.882	99.874	0	0	0	0	98.978	0	0	0	0	0	0	0	0	0	0	0	0	2
GCA_002125955.1	CFSA010	99.882	99.874	0	0	0	0	98.978	0	0	0	0	0	0	0	0	0	0	0	0	2
GCA_002125975.1	CFSA008	99.882	99.748	0	0	0	0	98.978	0	0	0	0	0	0	0	0	0	0	0	0	2
GCA_002126035.1	c59	99.882	99.874	0	0	0	0	98.978	0	0	0	0	0	0	0	0	0	0	0	0	2
GCA_002126045.1	c60	99.882	0	0	0	0	0	99.873	0	0	0	0	0	0	0	0	0	0	0	0	1
GCA_002126075.1	c57	99.882	99.874	0	0	0	0	98.978	0	0	0	0	0	0	0	0	0	0	0	0	2
GCA_002126105.1	c55	99.882	99.874	0	0	0	0	98.978	0	0	0	0	0	0	0	0	0	0	0	0	2
GCA_002126155.1	c52	99.882	99.874	0	0	0	0	98.978	0	0	0	0	0	0	0	0	0	0	0	0	2
GCA_002126215.1	c45	99.882	99.874	0	0	0	0	98.978	0	0	0	0	0	0	0	0	0	0	0	0	2
GCA_002126285.1	abscess129	99.882	99.874	0	0	0	0	98.978	0	0	0	0	0	0	0	0	0	0	0	0	2
GCA_002126315.1	abscess128	99.882	99.874	0	0	0	0	98.978	0	0	0	0	0	0	0	0	0	0	0	0	2
GCA_002126335.1	abscess126	99.882	99.874	0	0	0	0	98.978	0	0	0	0	0	0	0	0	0	0	0	0	2
GCA_002126345.1	abscess124	99.882	0	0	0	0	0	0	0	0	0	0	0	0	0	0	0	0	0	0	0
GCA_002126495.1	CFSA055	99.882	99.748	0	0	0	0	98.978	0	0	0	0	0	0	0	0	0	0	0	0	2
GCA_002126515.1	CFSA054	99.95	0	0	0	0	0	0	0	0	0	0	0	0	0	0	0	0	0	0	0
GCA_002126525.1	CFSA053	99.95	0	0	0	0	0	99.456	0	0	0	0	0	0	99.375	0	0	0	0	0	2
GCA_002126605.1	CFSA046	99.882	99.874	0	0	0	0	98.978	0	0	0	0	0	0	0	0	0	0	0	0	2
GCA_002126635.1	CFSA043	99.882	99.874	0	0	0	0	98.978	0	0	0	0	0	0	0	0	0	0	0	0	2
GCA_002126675.1	CFSA038	99.882	99.874	0	0	0	0	98.978	0	0	0	0	0	0	0	0	0	0	0	0	2
GCA_002126695.1	CFSA031	99.882	99.874	0	0	0	0	98.978	0	0	0	0	0	0	0	0	0	0	0	0	2
GCA_002126815.1	CFSA013	99.882	99.874	0	0	0	0	98.978	0	0	0	0	0	0	0	0	0	0	0	0	2
GCA_002126845.1	CFSA009	99.882	99.865	0	0	0	0	100	0	0	0	0	0	0	0	0	0	0	0	0	2
GCA_002126885.1	CFSA004	99.882	99.874	0	0	0	0	98.978	0	0	0	0	0	0	0	0	0	0	0	0	2
GCA_002126915.1	c61	99.882	99.874	0	0	0	0	98.978	0	0	0	0	0	0	0	0	0	0	0	0	2
GCA_002127055.1	abscess122	99.882	0	0	0	0	0	98.978	0	0	0	0	0	0	0	0	0	0	0	0	1
GCA_002127065.1	abscess125	99.882	99.874	0	0	0	0	98.978	0	0	0	0	0	0	0	0	0	0	0	0	2
GCA_002127455.1	CFSA116	99.882	99.874	0	0	0	0	98.978	0	0	0	0	0	0	0	0	0	0	0	0	2
GCA_002127465.1	CFSA279	99.882	0	0	0	0	0	98.422	0	0	0	0	0	0	0	0	0	0	0	0	1
GCA_002127475.1	CFSA007	99.882	99.874	0	0	0	0	98.978	0	0	0	0	0	0	0	0	0	0	0	0	2
GCA_002127485.1	CFSA228	99.882	99.874	0	0	0	0	98.978	0	0	0	0	0	0	0	100	0	0	0	0	3
GCA_002224915.1	TW22	99.882	99.874	0	0	0	0	98.978	0	0	0	0	0	0	0	0	0	0	0	0	2
GCA_002224925.1	TW21	99.882	99.748	0	0	0	0	98.978	0	0	0	0	0	0	0	0	0	0	0	0	2
GCA_002224955.1	TW20	99.882	99.748	0	0	0	0	98.978	0	0	0	0	0	0	0	0	0	0	0	0	2
GCA_002224965.1	TW17	99.882	99.874	0	0	0	0	98.978	0	0	0	0	0	0	0	0	0	0	0	0	2
GCA_002224995.1	TW19	99.764	99.874	0	0	0	0	98.978	0	0	0	0	0	0	0	0	0	0	0	0	2
GCA_002225015.1	TW16	99.882	100	0	0	0	0	98.978	0	0	0	0	0	0	0	0	0	0	0	0	2
GCA_002225035.1	TW18	99.882	99.874	0	0	0	0	98.978	0	0	0	0	0	0	0	0	0	0	0	0	2
GCA_002225055.1	TW23	99.882	99.874	0	0	0	0	98.978	0	0	0	0	0	0	0	0	0	0	0	0	2
GCA_002225085.1	TW15	99.882	99.874	0	0	0	0	98.978	0	0	0	0	0	0	0	0	0	0	0	0	2
GCA_002225105.1	TW13	99.882	99.874	0	0	0	0	98.978	0	0	0	0	0	0	0	0	0	0	0	0	2
GCA_002225135.1	TW14	99.882	99.874	0	0	0	0	98.978	0	0	0	0	0	0	0	0	0	0	0	0	2
GCA_002225155.1	TW12	99.882	99.874	0	0	0	0	98.978	0	0	0	0	0	0	0	0	0	0	0	0	2
GCA_002225175.1	TW11	99.882	99.874	0	0	0	0	98.978	0	0	0	0	0	0	0	0	0	0	0	0	2
GCA_002225195.1	TW10	99.882	99.874	0	0	0	0	98.978	0	0	0	0	0	0	0	0	0	0	0	0	2
GCA_002225215.1	TW08	99.882	99.874	0	0	0	0	0	0	0	0	0	0	0	0	0	0	0	0	0	1
GCA_002225235.1	TW09	99.764	99.874	0	0	0	0	98.978	0	0	0	0	0	0	0	0	0	0	0	0	2
GCA_002225245.1	TW07_4	99.882	99.874	0	0	0	0	98.978	0	0	0	0	0	0	0	0	0	0	0	0	2
GCA_002225275.1	TW07_3	99.882	99.874	0	0	0	0	98.978	0	0	0	0	0	0	0	0	0	0	0	0	2
GCA_002225295.1	TW07_2	99.882	99.874	0	0	0	0	98.978	0	0	0	0	0	0	0	0	0	0	0	0	2
GCA_002225315.1	TW07_1	99.882	99.874	0	0	0	0	98.978	0	0	0	0	0	0	0	0	0	0	0	0	2
GCA_002225335.1	TW05	99.882	99.874	0	0	0	0	98.978	0	0	0	0	0	0	0	0	0	0	0	0	2
GCA_002225345.1	TW06	99.764	99.874	0	0	0	0	98.978	0	0	0	0	0	0	0	0	0	0	0	0	2
GCA_002225375.1	TW04	99.882	99.874	0	0	0	0	98.978	0	0	0	0	0	0	0	0	0	0	0	0	2
GCA_002225395.1	TW03	99.882	99.874	0	0	0	0	98.978	0	0	0	0	0	0	0	0	0	0	0	0	2
GCA_002225405.1	TW02	99.764	99.874	0	0	0	0	98.978	0	0	0	0	0	0	0	0	0	0	0	0	2
GCA_002225435.1	TW01_1	99.882	99.874	0	0	0	0	98.978	0	0	0	0	0	0	0	0	0	0	0	0	2
GCA_002225455.1	TW01	99.882	99.874	0	0	0	0	98.978	0	0	0	0	0	0	0	0	0	0	0	0	2
GCA_900250165.1	H1303	99.882	99.874	0	0	0	0	98.978	0	0	0	0	0	0	0	0	0	0	0	0	2
GCA_900250265.1	H1419	99.882	99.874	0	0	0	0	98.978	0	0	0	0	0	0	0	0	0	0	0	0	2
GCA_900250275.1	H1412	99.882	0	0	0	0	0	99.184	0	0	0	0	0	0	0	0	0	0	0	0	1
GCA_900250285.1	H1384	99.882	99.874	0	0	0	0	98.978	0	0	0	0	0	0	0	0	0	0	0	0	2
GCA_900250365.1	H1354	99.882	99.874	0	0	0	0	99.048	0	0	0	0	0	0	0	0	0	0	0	0	2
GCA_900250495.1	H1533	99.882	99.874	0	0	0	0	98.978	0	0	0	0	0	0	0	0	0	0	0	0	2
GCA_900250705.1	H1795	99.882	0	0	0	0	0	98.978	0	0	0	0	0	0	0	0	0	0	0	0	1
GCA_900250785.1	HL451	99.882	99.874	0	0	0	0	98.978	0	0	0	0	0	0	0	0	0	0	0	0	2
GCA_900250825.1	M2857	99.882	99.874	0	0	0	0	98.978	0	0	0	0	0	0	0	0	0	0	0	0	2
GCA_900251015.1	M3014	99.882	99.874	0	0	0	0	98.978	0	0	0	0	0	0	0	0	0	0	0	0	2
GCA_900251065.1	M2959	99.882	99.874	0	0	0	0	98.978	0	0	0	0	0	0	0	0	0	0	0	0	2
GCA_900251185.1	M3094	99.882	99.874	0	0	0	0	98.978	0	0	0	0	0	0	0	0	0	0	0	0	2
GCA_900251265.1	M3241	99.882	99.874	0	0	0	0	98.978	0	0	0	0	0	0	0	0	0	0	0	0	2
GCA_900251315.1	M3392	99.882	99.874	0	0	0	0	98.978	0	0	0	0	0	0	0	0	0	0	0	0	2
GCA_900251375.1	M3456	99.882	0	0	0	0	0	98.978	0	0	0	0	0	0	0	0	0	0	0	0	1
GCA_900251665.1	M3747	99.882	99.874	0	0	0	0	98.978	0	0	0	0	0	0	0	0	0	0	0	0	2
GCA_900251705.1	M3594	99.882	99.874	0	0	0	0	98.978	0	0	0	0	0	0	0	0	0	0	0	0	2
GCA_900251795.1	M3750	99.882	99.874	0	0	0	0	98.978	0	0	0	0	0	0	0	0	0	0	0	0	2
GCA_900251805.1	M3720	99.882	99.874	0	0	0	0	98.978	0	0	0	0	0	0	0	0	0	0	0	0	2
GCA_900251855.1	M3908	99.882	0	0	0	0	0	98.978	0	0	0	0	0	0	0	0	0	0	0	0	1
GCA_900251885.1	M3877	99.882	100	0	0	0	0	99.177	0	0	0	0	0	0	100	0	0	0	0	0	3
GCA_900251995.1	M3992	99.882	0	0	0	0	0	0	0	0	0	0	0	0	0	0	0	0	0	0	0
GCA_900252015.1	M3994	99.882	99.874	0	0	0	0	98.978	0	0	0	0	0	0	0	0	0	0	0	0	2
GCA_900252105.1	RH150	99.882	99.748	0	0	0	0	98.978	0	0	0	0	0	0	0	0	0	0	0	0	2
GCA_900252155.1	RH233	99.882	99.874	0	0	0	0	98.978	0	0	0	0	0	0	0	0	0	0	0	0	2
GCA_000732745.1	Brady-SAP149	99.552	0	0	0	0	0	0	0	0	0	0	0	0	0	0	0	0	0	0	0
GCA_000536895.1	WMCA6180	99.882	99.874	0	0	0	0	98.978	0	0	0	0	0	0	0	0	0	0	0	0	2
GCA_000536915.1	FVRH6076	99.882	99.874	0	0	0	0	98.978	0	0	0	0	0	0	0	0	0	0	0	0	2
GCA_000536935.1	LAMC6094	99.95	99.874	0	0	0	0	98.978	0	0	0	0	0	0	0	0	0	0	0	0	2
GCA_000536955.1	UCIM6085	99.882	99.874	0	0	0	0	98.978	0	0	0	0	0	0	0	0	0	0	0	0	2
GCA_000536975.1	SJOS6139	99.882	99.874	0	0	0	0	98.978	0	0	0	0	0	0	0	0	0	0	0	0	2
GCA_000536995.1	KINB6009	99.95	100	0	0	0	0	0	0	0	0	0	0	0	0	0	0	0	0	0	1
GCA_000537015.1	LAMC6066	99.882	99.874	0	0	0	0	98.978	0	0	0	0	0	0	0	0	0	0	0	0	2
GCA_000537055.1	SJUD6114	99.882	99.874	0	0	0	0	98.978	0	0	0	0	0	0	0	0	0	0	0	0	2
GCA_000537075.1	OCMM6065	99.882	99.874	0	0	0	0	98.978	0	0	0	0	0	0	0	0	0	0	0	0	2
GCA_000537095.1	HSOU6002	99.882	99.874	0	0	0	0	99.184	0	0	0	0	0	0	0	0	0	0	0	0	2
GCA_000537175.1	UCIM6057	99.882	99.874	0	0	0	0	98.978	0	0	0	0	0	0	0	0	0	0	0	0	2
GCA_000537235.1	SJUD6022	99.882	99.874	0	0	0	0	98.978	0	0	0	0	0	0	0	0	0	0	0	0	2
GCA_000537275.1	AGEN6010	99.882	99.874	0	0	0	0	98.978	0	0	0	0	0	0	0	0	0	0	0	0	2
GCA_000537295.1	SCLE6005	99.95	99.874	0	0	0	0	0	0	0	0	0	0	0	0	0	0	0	0	0	1
GCA_000537375.1	COAS6001	99.882	99.874	0	0	0	0	98.978	0	0	0	0	0	0	0	0	0	0	0	0	2
GCA_000537495.1	SJOS6098	99.882	99.874	0	0	0	0	98.978	0	0	0	0	0	0	100	0	0	0	0	0	3
GCA_000537515.1	COAS6039	99.882	99.874	0	0	0	0	98.978	0	0	0	0	0	0	0	0	0	0	0	0	2
GCA_000537535.1	CHOC6045	99.882	99.874	0	0	0	0	98.978	0	0	0	0	0	0	0	0	0	0	0	0	2
GCA_000537575.1	TUSH6001	99.764	99.874	0	0	0	0	98.978	0	0	0	0	0	0	0	0	0	0	0	0	2
GCA_000537595.1	UCIM6019	99.882	99.874	0	0	0	0	98.978	0	0	0	0	0	0	0	0	0	0	0	0	2
GCA_000537635.1	MISS6007	99.882	99.874	0	0	0	0	98.978	0	0	0	0	0	0	0	0	0	0	0	0	2
GCA_000537655.1	HOAG6059	99.882	99.874	0	0	0	0	99.184	0	0	0	0	0	0	0	0	0	0	0	0	2
GCA_000537715.1	LAMC0037	99.882	99.874	0	0	0	0	98.909	0	0	0	0	0	0	100	0	0	0	0	0	3
GCA_000537775.1	SJUD6064	99.882	99.874	0	0	0	0	98.978	0	0	0	0	0	0	0	0	0	0	0	0	2
GCA_000537795.1	SMMC6007	99.882	99.748	0	0	0	0	98.978	0	0	0	0	0	0	0	0	0	0	0	0	2
GCA_000537815.1	COAS6025	99.882	99.874	0	0	0	0	98.978	0	0	0	0	0	0	0	0	0	0	0	0	2
GCA_000537855.1	SJOS6061	99.764	99.874	0	0	0	0	98.978	0	0	0	0	0	0	0	0	0	0	0	0	2
GCA_000537875.1	GGMC6008	99.882	99.874	0	0	0	0	98.978	0	0	0	0	0	0	0	0	0	0	0	0	2
GCA_000537895.1	SJOS6051	99.882	99.874	0	0	0	0	98.978	0	0	0	0	0	0	0	0	0	0	0	0	2
GCA_000593405.1	W31947	99.95	0	0	0	0	0	0	0	0	0	0	0	0	0	0	0	0	0	0	0
GCA_000593445.1	H12822	99.95	0	0	0	0	0	0	0	0	0	0	0	0	0	0	0	0	0	0	0
GCA_000593465.1	T59609	99.95	0	0	0	0	0	0	0	0	0	0	0	0	0	0	0	0	0	0	0
GCA_000593505.1	T66243	99.882	100	0	0	0	0	0	0	0	0	0	0	0	0	0	0	0	0	0	1
GCA_000593525.1	T66292	99.95	0	0	0	0	0	0	0	0	0	0	0	0	0	0	0	0	0	0	0
GCA_000593545.1	W12461	99.95	0	0	0	0	0	0	0	0	0	0	0	0	0	0	0	0	0	0	0
GCA_000593565.1	M80329	99.95	0	0	0	0	0	0	0	0	0	0	0	0	0	0	0	0	0	0	0
GCA_000593585.1	F46600	99.95	0	0	0	0	0	0	0	0	0	0	0	0	0	0	0	0	0	0	0
GCA_000593625.1	F55987	99.95	0	0	0	0	0	0	0	0	0	0	0	0	0	0	0	0	0	0	0
GCA_000593645.1	T74602	99.95	0	0	0	0	0	98.978	0	0	0	0	0	0	0	0	0	0	0	0	1
GCA_000593665.1	F86379	99.95	0	0	0	0	0	0	0	0	0	0	0	0	0	0	0	0	0	0	0
GCA_000593685.1	F27253	99.95	0	0	0	0	0	0	0	0	0	0	0	0	0	0	0	0	0	0	0
GCA_000593705.1	F27254	99.95	100	0	0	0	0	0	0	0	0	0	0	0	0	0	0	0	0	0	1
GCA_000593725.1	T72814	99.95	0	0	0	0	0	0	0	0	0	0	0	0	0	0	0	0	0	0	0
GCA_000593745.1	M44988	99.95	0	0	0	0	0	0	0	0	0	0	0	0	0	0	0	0	0	0	0
GCA_000593765.1	F12856	99.95	0	0	0	0	0	0	0	0	0	0	0	0	0	0	0	0	0	0	0
GCA_000593805.1	M24487	99.95	0	0	0	0	0	0	0	0	0	0	0	0	0	0	0	0	0	0	0
GCA_000593825.1	T23068	99.95	0	0	0	0	0	0	0	0	0	0	0	0	0	0	0	0	0	0	0
GCA_000593845.1	W39826	99.882	99.874	0	0	0	0	98.978	0	0	0	0	0	0	0	0	0	0	0	0	2
GCA_000593865.1	W29641	99.95	0	0	0	0	0	98.444	0	0	0	0	0	0	0	0	0	0	0	0	1
GCA_000593885.1	T60795	99.882	99.874	0	0	0	0	98.978	0	0	0	0	0	0	0	0	0	0	0	0	2
GCA_000593905.1	T54283	99.764	99.874	0	0	0	0	98.978	0	0	0	0	0	0	0	0	0	0	0	0	2
GCA_000593945.1	M16597	99.95	0	0	0	0	0	0	0	0	0	0	0	0	0	0	0	0	0	0	0
GCA_000593965.1	M13048	99.882	0	0	0	0	0	0	0	0	0	0	0	0	0	0	0	0	0	0	0
GCA_000593985.1	H85008	99.882	99.874	0	0	0	0	98.978	0	0	0	0	0	0	0	0	0	0	0	0	2
GCA_000594005.1	H81885	99.882	99.874	0	0	0	0	98.978	0	0	0	0	0	0	0	0	0	0	0	0	2
GCA_000594025.1	H81809	99.882	99.874	0	0	0	0	98.978	0	0	0	0	0	0	0	0	0	0	0	0	2
GCA_000594045.1	H81800	99.882	0	0	0	0	0	98.978	0	0	0	0	0	0	0	0	0	0	0	0	1
GCA_000594065.1	F50126	99.882	99.874	0	0	0	0	98.978	0	0	0	0	0	0	0	0	0	0	0	0	2
GCA_000594085.1	F50076	99.882	99.874	0	0	0	0	98.978	0	0	0	0	0	0	0	0	0	0	0	0	2
GCA_000594105.1	F36670	99.882	99.874	0	0	0	0	98.978	0	0	0	0	0	0	0	0	0	0	0	0	2
GCA_000594145.1	W92052	99.882	99.874	0	0	0	0	98.978	0	0	0	0	0	0	0	0	0	0	0	0	2
GCA_000594165.1	W85326	99.882	99.874	0	0	0	0	98.978	0	0	0	0	0	0	0	0	0	0	0	0	2
GCA_000594185.1	W75132	99.882	100	0	0	0	0	98.978	0	0	0	0	0	0	0	0	0	0	0	0	2
GCA_000594205.1	W64921	99.95	0	0	0	0	0	0	0	0	0	0	0	0	0	0	0	0	0	0	0
GCA_000594225.1	T37849	99.882	99.748	0	0	0	0	98.978	0	0	0	0	0	0	0	0	0	0	0	0	2
GCA_000594245.1	T30569	99.882	99.874	0	0	0	0	98.978	0	0	0	0	0	0	0	0	0	0	0	0	2
GCA_000594305.1	M49691	99.882	100	0	0	0	0	98.978	0	0	0	0	0	0	0	0	0	0	0	0	2
GCA_000594345.1	H58198	99.882	99.874	0	0	0	0	98.978	0	0	0	0	0	0	0	0	0	0	0	0	2
GCA_000594365.1	H58177	99.882	99.874	0	0	0	0	98.978	0	0	0	0	0	0	0	0	0	0	0	0	2
GCA_000594385.1	H51158	99.882	0	0	0	0	0	0	0	0	0	0	0	0	0	0	0	0	0	0	0
GCA_000594425.1	F26873	99.882	0	0	0	0	0	98.978	0	0	0	0	0	0	0	0	0	0	0	0	1
GCA_000594445.1	F23347	99.882	100	0	0	0	0	0	0	0	0	0	0	0	0	0	0	0	0	0	1
GCA_000594465.1	F23336	99.882	0	0	0	0	0	0	0	0	0	0	0	0	0	0	0	0	0	0	0
GCA_000594485.1	F20105	99.882	99.748	0	0	0	0	98.978	0	0	0	0	0	0	0	0	0	0	0	0	2
GCA_000594545.1	W12586	99.882	99.874	0	0	0	0	98.978	0	100	100	0	0	0	99.928	0	0	0	0	0	5
GCA_000594565.1	T86792	99.882	99.874	0	0	0	0	98.978	0	0	0	0	0	0	0	0	0	0	0	0	2
GCA_000594585.1	T39102	99.882	0	0	0	0	0	0	0	0	0	0	0	0	0	0	0	0	0	0	0
GCA_000594605.1	T32092	99.882	0	0	0	0	0	98.978	0	0	0	0	0	0	0	0	0	0	0	0	1
GCA_000594625.1	T24515	99.882	99.874	0	0	0	0	98.978	0	0	0	0	0	0	0	0	0	0	0	0	2
GCA_000594645.1	T13127	99.882	99.874	0	0	0	0	98.978	0	0	0	0	0	0	0	0	0	0	0	0	2
GCA_000594665.1	T13126	99.95	0	0	0	0	0	98.444	0	0	0	0	0	0	0	0	0	0	0	0	1
GCA_000594685.1	T13125	99.882	99.874	0	0	0	0	99.048	0	0	0	0	0	0	0	0	0	0	0	0	2
GCA_000594705.1	M79684	99.95	100	0	0	0	0	99.177	0	0	0	0	0	0	0	0	0	0	0	0	2
GCA_000594725.1	H84958	99.882	0	0	0	0	0	98.978	0	0	0	0	0	0	0	0	0	0	0	0	1
GCA_000594745.1	H84956	99.882	0	0	0	0	0	98.978	0	0	0	0	0	0	0	0	0	0	0	0	1
GCA_000594765.1	H75430	99.882	99.874	0	0	0	0	98.978	0	0	0	0	0	0	0	0	0	0	0	0	2
GCA_000594785.1	H72152	99.882	99.874	0	0	0	0	98.978	0	0	0	0	0	0	0	0	0	0	0	0	2
GCA_000594805.1	H71778	99.882	0	0	0	0	0	98.978	0	0	0	0	0	0	0	0	0	0	0	0	1
GCA_000594825.1	H65853	99.882	99.874	0	0	0	0	98.909	0	0	0	0	0	0	0	0	0	0	0	0	2
GCA_000594845.1	H31085	99.882	0	0	0	0	0	98.978	0	0	0	0	0	0	0	0	0	0	0	0	1
GCA_000594865.1	F64897	99.882	99.874	0	0	0	0	98.978	0	0	0	0	0	0	0	0	0	0	0	0	2
GCA_000594885.1	F45779	99.882	99.874	0	0	0	0	98.978	0	0	0	0	0	0	0	0	0	0	0	0	2
GCA_000594905.1	F36091	99.882	99.874	0	0	0	0	98.909	0	0	0	0	0	0	0	0	0	0	0	0	2
GCA_000596545.1	T70944	99.882	99.874	0	0	0	0	98.978	0	0	0	0	0	0	0	0	0	0	0	0	2
GCA_000596605.1	T74154	99.882	99.874	0	0	0	0	98.978	0	0	0	0	0	0	0	0	0	0	0	0	2
GCA_000596625.1	T74060	99.882	99.874	0	0	0	0	98.978	0	0	0	0	0	0	0	0	0	0	0	0	2
GCA_000596645.1	T74141	99.882	0	0	0	0	0	0	0	0	0	0	0	0	0	0	0	0	0	0	0
GCA_000596665.1	F63730	99.95	0	0	0	0	0	0	0	0	0	0	0	0	0	0	0	0	0	0	0
GCA_000596685.1	H32126	99.882	99.874	0	0	0	0	98.978	0	0	0	0	0	0	0	0	0	0	0	0	2
GCA_000596705.1	M32688	99.882	99.874	0	0	0	0	98.978	0	0	0	0	0	0	0	0	0	0	0	0	2

## Sheet: ST239
Assembly	Strain	beta-lactam	aminoglycoside	colistin	fosfomycin	fusidicacid	glycopeptide	macrolide	nitroimidazole	oxazolidinone	phenicol	quinolone	rifampicin	sulphonamide	tetracycline	trimethoprim	ardA-H2	ardA-H1	Tn916	Tn5801	Resistance without bl
GCA_000027045.1	TW20	98.345	99.874	0	0	0	0	100	0	0	0	0	0	0	97.708	100	0	100	0	99.98	4
GCA_000145595.1	JKD6008	98.463	100	0	0	0	0	99.863	0	0	0	0	0	0	97.708	0	0	100	0	99.968	3
GCA_000204665.1	T0131	98.227	100	0	0	0	0	99.863	0	0	0	0	0	0	97.708	0	0	100	0	99.965	3
GCA_000418345.1	Bmb9393	98.463	99.78	0	0	0	0	100	0	0	100	0	0	0	97.656	0	0	100	0	100	4
GCA_000485885.1	Z172	98.463	99.874	0	0	0	0	100	0	0	0	0	0	0	97.708	100	0	100	0	99.967	4
GCA_000709475.1	XN108	98.345	99.874	0	0	0	0	100	0	0	0	0	0	0	97.656	100	0	100	0	99.948	4
GCA_000769575.1	Gv69	98.345	99.78	0	0	0	0	100	0	0	0	0	0	0	97.656	0	0	100	0	99.986	3
GCA_001515665.1	Gv51	98.463	99.78	0	0	0	0	100	0	0	100	0	0	0	97.708	0	0	100	0	99.986	4
GCA_001515685.1	Be62	98.463	99.78	0	0	0	0	100	0	0	100	0	0	0	97.656	0	0	100	0	99.982	4
GCA_001515705.1	Gv88	98.463	99.78	0	0	0	0	100	0	0	100	0	0	0	97.708	0	0	100	0	99.986	4
GCA_001515745.1	HC1340	98.463	99.78	0	0	0	0	100	0	0	0	0	0	0	97.656	0	0	100	0	99.986	3
GCA_001515765.1	HC1335	98.463	99.78	0	0	0	0	100	0	0	0	0	0	0	97.708	0	0	100	0	99.943	3
GCA_001641025.1	V521	98.463	99.874	0	0	0	0	100	0	0	0	0	0	0	97.708	100	0	100	0	99.98	4
GCA_002097595.2	M92	98.463	99.874	0	0	0	0	99.863	0	0	0	0	0	0	97.708	0	0	100	0	99.982	3
GCA_002895385.1	MRSA107	98.463	99.874	0	0	0	0	100	0	0	0	0	0	0	97.708	100	0	100	0	99.974	4
GCA_003264775.1	CMRSA-3	98.463	99.872	0	0	0	0	100	0	0	0	0	0	0	97.708	100	0	100	0	99.972	4
GCA_003264815.1	CMRSA-6	98.463	99.874	0	0	0	0	100	0	0	0	0	0	0	97.708	100	0	100	0	99.98	4
GCA_003394105.1	WCH-SK2	98.463	100	0	0	0	0	99.863	0	0	0	0	0	0	97.708	0	0	100	0	99.972	3
GCA_004136255.1	M48	98.463	99.874	0	0	0	0	100	0	0	0	0	0	0	97.708	100	0	100	0	99.98	4
GCA_005890015.1	JKD6004	98.463	99.872	0	0	0	0	99.863	0	0	0	0	0	0	97.708	0	0	100	0	99.972	3
GCA_900474575.1	NCTC9944	98.463	100	0	0	0	0	100	0	0	0	0	0	0	97.708	100	0	100	0	99.982	4
GCA_900475055.1	NCTC11940	98.463	99.872	0	0	0	0	99.863	0	0	0	0	0	0	97.708	0	0	100	0	99.975	3
GCA_900607245.1	JKD6009	98.463	100	0	0	0	0	99.863	0	0	0	0	0	0	97.708	0	0	100	0	99.968	3
GCA_900607255.1	BPH2019	98.463	100	0	0	0	0	99.863	0	0	0	0	0	0	97.708	0	0	100	0	99.972	3
GCA_900607265.1	BPH2003	98.463	99.874	0	0	0	0	100	0	0	0	0	0	0	97.708	100	0	100	0	99.98	4
GCA_900607275.1	BPH2070	98.463	100	0	0	0	0	99.863	0	0	0	0	0	0	97.656	0	0	100	0	99.961	3
GCA_900607285.1	BPH3244	98.463	100	0	0	0	0	99.863	0	0	0	0	0	0	97.708	0	0	100	0	99.968	3
GCA_900607295.1	BPH2869	98.463	100	0	0	0	0	99.863	0	0	0	0	0	0	97.708	0	0	100	0	99.972	3
GCA_900607305.1	BPH2056	98.463	99.874	0	0	0	0	99.863	0	0	0	0	0	0	97.708	0	0	100	0	99.975	3
GCA_900620245.1	BPH2947	98.463	99.874	0	0	0	0	100	0	0	0	0	0	0	97.708	100	0	100	0	99.961	4
GCA_002407105.1	NMR08	98.463	99.874	0	0	0	0	100	0	0	0	0	0	0	97.708	0	0	100	0	99.961	3
GCA_000146385.1	ATCC BAA-39	98.463	100	0	0	0	0	100	0	0	0	0	0	0	97.708	0	0	100	0	99.982	3
GCA_000537975.1	SJOS6053	99.801	99.874	0	0	0	0	100	0	0	0	0	0	0	97.708	100	0	100	0	99.98	4
GCA_000538115.1	SJOS6072	98.463	99.874	0	0	0	0	100	0	0	0	0	0	0	97.708	100	0	100	0	0	4
GCA_000539175.1	FVRH6002	98.463	99.874	0	0	0	0	100	0	0	0	0	0	0	97.656	100	0	100	0	99.98	4
GCA_000539775.1	LAMC0011	99.801	99.874	0	0	0	0	100	0	0	0	0	0	0	97.708	100	0	100	0	0	4
GCA_000540375.1	UCIM6042	99.801	99.874	0	0	0	0	100	0	0	0	0	0	0	97.708	100	0	100	0	99.98	4
GCA_000542435.1	WAMC6102	98.463	99.874	0	0	0	0	100	0	0	0	0	0	0	97.708	100	0	100	0	99.98	4
GCA_000543345.1	KINW6048	98.463	99.874	0	0	0	0	100	0	0	0	0	0	0	97.708	100	0	100	0	99.974	4
GCA_000172855.1	JKD6009	98.463	100	0	0	0	0	99.863	0	0	0	0	0	0	97.708	0	0	100	0	99.968	3
GCA_000208695.1	16K	98.345	99.93	0	0	0	0	0	0	0	99.846	0	0	0	97.708	0	0	100	0	0	3
GCA_000239635.2	21178	98.463	99.874	0	0	0	0	100	0	0	100	0	0	0	97.708	100	0	100	0	99.982	5
GCA_000259995.1	IS-125	98.345	99.67	0	0	0	0	100	0	0	0	0	0	0	97.656	0	0	100	0	0	3
GCA_000260015.1	IS-157	98.345	99.67	0	0	0	0	100	0	0	0	0	0	0	97.708	0	0	100	0	0	3
GCA_000260055.1	IS-189	98.463	99.874	0	0	0	0	100	0	0	98.457	0	0	0	97.708	100	0	100	0	0	5
GCA_000313005.1	PPUKM-775-2009	98.463	99.874	0	0	0	0	100	0	0	0	0	0	0	97.708	100	0	100	0	99.961	4
GCA_000313595.1	CN79	98.345	0	0	0	0	0	0	0	0	0	0	0	0	97.708	0	0	100	0	99.961	1
GCA_000401475.1	MRGR3	98.463	99.874	0	0	0	0	100	0	0	0	0	0	0	97.708	0	0	100	0	99.986	3
GCA_000537615.1	UCIM6015	98.463	99.874	0	0	0	0	100	0	0	0	0	0	0	97.708	100	0	100	0	99.98	4
GCA_000685335.1	HST-077	98.463	99.874	0	0	0	0	100	0	0	0	0	0	0	97.708	100	0	100	0	0	4
GCA_000732805.1	CUHK_BJ2002	98.227	99.93	0	0	0	0	0	0	0	0	0	0	0	97.708	0	0	100	0	99.961	2
GCA_000732815.1	CUHK_BJ2007	98.345	99.93	0	0	0	0	99.048	0	0	0	0	0	0	97.708	0	0	100	0	99.965	3
GCA_000732825.1	CUHK_HK1997	98.463	99.874	0	0	0	0	100	0	0	0	0	0	0	97.708	0	0	100	0	99.982	3
GCA_000732835.1	CUHK_HK2007	98.463	99.874	0	0	0	0	100	0	0	0	0	0	0	97.708	100	0	100	0	99.961	4
GCA_000784385.1	MRSA_PR1	98.463	100	0	0	0	0	100	0	0	0	0	0	0	97.708	100	0	100	0	99.98	4
GCA_000787025.1	346	98.463	99.93	0	0	0	0	100	0	0	93.827	0	0	0	97.708	100	0	100	0	99.98	5
GCA_000974385.1	OC3	98.463	100	0	0	0	0	100	0	0	100	0	0	0	97.708	0	0	100	0	0	4
GCA_001018635.2	FDAARGOS_3	98.463	99.78	0	0	0	0	99.863	0	0	0	0	0	0	97.708	0	0	100	0	99.982	3
GCA_001047755.1	M170	98.463	99.874	0	0	0	0	100	0	0	0	0	0	0	97.708	100	0	100	0	99.975	4
GCA_001062275.1	1195_SAUR	98.463	99.874	0	0	0	0	100	0	0	0	0	0	0	97.708	100	0	100	0	0	4
GCA_001184285.2	V808	98.463	99.874	0	0	0	0	100	0	0	0	0	0	0	97.708	100	0	100	0	99.98	4
GCA_001223825.1	HU8	98.345	99.93	0	0	0	0	100	0	0	0	0	0	0	97.708	0	0	100	0	99.965	3
GCA_001224305.1	IU17	98.345	99.93	0	0	0	0	99.048	0	0	0	0	0	0	97.708	0	0	100	0	99.961	3
GCA_001224505.1	DEU15	98.345	99.93	0	0	0	0	0	0	0	0	0	0	0	97.708	0	0	100	0	99.968	2
GCA_001224565.1	MU4	98.345	100	0	0	0	0	99.048	0	0	0	0	0	0	97.708	0	0	100	0	99.961	3
GCA_001224705.1	IU13	98.345	99.93	0	0	0	0	100	0	0	0	0	0	0	97.708	0	0	100	0	99.968	3
GCA_001224725.1	NA32	98.463	99.872	0	0	0	0	100	0	0	0	0	0	0	97.708	0	0	100	0	99.982	3
GCA_001224785.1	HU15	98.345	99.93	0	0	0	0	0	0	0	0	0	0	0	97.708	0	0	100	0	99.954	2
GCA_001224885.1	M418	98.463	99.874	0	0	0	0	100	0	0	0	0	0	0	97.708	0	0	100	0	99.968	3
GCA_001225125.1	MU1	98.345	99.791	0	0	0	0	100	0	0	0	0	0	0	97.708	0	0	100	0	99.965	3
GCA_001225305.1	IU18	98.345	99.93	0	0	0	0	0	0	0	0	0	0	0	97.708	0	0	100	0	99.964	2
GCA_001226265.1	P32	98.463	99.874	0	0	0	0	100	0	0	0	0	0	0	97.708	0	0	100	0	99.968	3
GCA_001226525.1	MAL11	98.463	99.874	0	0	0	0	100	0	0	0	0	0	0	97.708	0	0	100	0	99.982	3
GCA_001226625.1	DEU3	98.345	99.93	0	0	0	0	100	0	0	0	0	0	0	97.708	0	0	100	0	99.961	3
GCA_001226645.1	HU23	98.345	99.93	0	0	0	0	0	0	0	0	0	0	0	97.708	0	0	100	0	99.961	2
GCA_001226905.1	LIT68	98.463	100	0	0	0	0	100	0	0	100	0	0	0	97.708	0	0	100	0	99.986	4
GCA_001227005.1	DEU20	98.345	99.93	0	0	0	0	0	0	0	0	0	0	0	97.708	0	0	100	0	99.968	2
GCA_001227505.1	MU5	98.345	99.93	0	0	0	0	0	0	0	0	0	0	0	97.708	0	0	100	0	99.965	2
GCA_001227545.1	D90	98.463	99.872	0	0	0	0	100	0	0	100	0	0	0	97.708	100	0	100	0	99.982	5
GCA_001227565.1	HU16	98.345	99.93	0	0	0	0	100	0	0	0	0	0	0	97.708	0	0	100	0	99.965	3
GCA_001227825.1	FRICAR	98.463	99.78	0	0	0	0	100	0	0	0	0	0	0	97.708	0	0	100	0	99.993	3
GCA_001228045.1	MAL1	98.463	99.874	0	0	0	0	100	0	0	99.081	0	0	0	97.708	100	0	100	0	99.98	5
GCA_001228265.1	IU2	98.345	99.93	0	0	0	0	0	0	0	0	0	0	0	97.708	0	0	100	0	99.968	2
GCA_001228365.1	DEU16	98.345	99.872	0	0	0	0	98.73	0	0	0	0	0	0	97.708	0	0	100	0	99.961	3
GCA_001228645.1	HU13	98.345	99.93	0	0	0	0	99.048	0	0	0	0	0	0	97.708	0	0	100	0	99.968	3
GCA_001228785.1	DEU11	98.345	99.872	0	0	0	0	100	0	0	0	0	0	0	97.708	0	0	100	0	99.968	3
GCA_001228965.1	HU4	98.345	99.93	0	0	0	0	0	0	0	0	0	0	0	97.708	0	0	100	0	99.965	2
GCA_001229045.1	RA3	98.463	99.93	0	0	0	0	100	0	0	98.78	0	0	0	97.708	0	0	100	0	99.975	4
GCA_001229425.1	DEU5	98.345	99.93	0	0	0	0	0	0	0	0	0	0	0	97.708	0	0	100	0	99.968	2
GCA_001229625.1	H24	98.463	99.67	0	0	0	0	99.863	0	0	99.541	0	0	0	97.708	0	0	100	0	99.965	4
GCA_001229745.1	IU11	98.345	99.93	0	0	0	0	98.779	0	0	0	0	0	0	97.708	0	0	100	0	99.965	3
GCA_001230265.1	HU26	98.345	99.93	0	0	0	0	0	0	0	0	0	0	0	97.708	0	0	100	0	99.961	2
GCA_001230325.1	RA7	98.463	99.78	0	0	0	0	100	0	0	0	0	0	0	97.708	0	0	100	0	99.993	3
GCA_001230505.1	DEU12	98.345	99.93	0	0	0	0	0	0	0	0	0	0	0	97.708	0	0	100	0	99.965	2
GCA_001230925.1	IU15	98.345	99.93	0	0	0	0	0	0	0	0	0	0	0	97.708	0	0	100	0	99.972	2
GCA_001230965.1	IU9	98.345	99.93	0	0	0	0	98.507	0	0	0	0	0	0	97.708	0	0	100	0	99.968	3
GCA_001231325.1	M996	98.345	99.874	0	0	0	0	99.863	0	0	0	0	0	0	97.708	0	0	99.8	0	99.961	3
GCA_001231925.1	HU11	98.345	99.93	0	0	0	0	0	0	0	0	0	0	0	97.708	0	0	100	0	99.965	2
GCA_001232005.1	IU10	98.345	99.93	0	0	0	0	98.779	0	0	0	0	0	0	97.708	0	0	100	0	99.961	3
GCA_001232045.1	DEU17	98.345	99.93	0	0	0	0	0	0	0	0	0	0	0	97.708	0	0	100	0	99.968	2
GCA_001232505.1	M592	98.345	99.874	0	0	0	0	100	0	0	0	0	0	0	97.656	100	0	100	0	0	4
GCA_001232765.1	H482	98.345	99.93	0	0	0	0	0	0	0	0	0	0	0	97.708	0	0	100	0	99.972	2
GCA_001233925.1	ES26	98.463	99.78	0	0	0	0	100	0	0	0	0	0	0	97.708	0	0	100	0	99.986	3
GCA_001234245.1	DEU8	98.345	99.93	0	0	0	0	98.785	0	0	0	0	0	0	97.708	0	0	100	0	99.968	3
GCA_001234525.1	IU20	98.345	99.93	0	0	0	0	99.048	0	0	0	0	0	0	97.708	0	0	100	0	99.968	3
GCA_001234625.1	HU6	98.345	99.93	0	0	0	0	0	0	0	0	0	0	0	97.708	0	0	100	0	99.968	2
GCA_001234765.1	M116	98.463	99.874	0	0	0	0	100	0	0	0	0	0	0	97.708	100	0	100	0	99.974	4
GCA_001235205.1	Na21	98.463	99.874	0	0	0	0	100	0	0	0	0	0	0	97.708	0	0	100	0	99.982	3
GCA_001236065.1	MAL215	98.463	99.874	0	0	0	0	100	0	0	0	0	0	0	97.708	100	0	100	0	99.987	4
GCA_001236505.1	DEU10	98.345	99.93	0	0	0	0	100	0	0	0	0	0	0	97.708	0	0	100	0	99.961	3
GCA_001236885.1	HU5	98.345	99.93	0	0	0	0	98.785	0	0	0	0	0	0	97.708	0	0	100	0	99.965	3
GCA_001237305.1	MU20	98.345	99.93	0	0	0	0	0	0	0	0	0	0	0	97.708	0	0	100	0	99.961	2
GCA_001237365.1	HU14	98.345	99.93	0	0	0	0	0	0	0	0	0	0	0	97.708	0	0	100	0	99.965	2
GCA_001238925.1	HU21	98.345	99.93	0	0	0	0	0	0	0	0	0	0	0	97.708	0	0	100	0	99.965	2
GCA_001239085.1	H216	98.463	99.874	0	0	0	0	100	0	0	0	0	0	0	97.708	100	0	100	0	99.979	4
GCA_001239585.1	M705	98.463	99.874	0	0	0	0	100	0	0	98.313	0	0	0	97.656	100	0	100	0	99.972	5
GCA_001652205.1	NMR09	98.463	99.874	0	0	0	0	100	0	0	0	0	0	0	97.708	0	0	100	0	99.965	3
GCA_001652225.1	NMR07	98.463	99.874	0	0	0	0	100	0	0	0	0	0	0	97.708	0	0	100	0	99.965	3
GCA_001652285.1	NMR05	98.463	99.874	0	0	0	0	100	0	0	0	0	0	0	97.708	0	0	100	0	99.982	3
GCA_001677355.1	HC556	98.463	99.78	0	0	0	0	100	0	0	0	0	0	0	97.708	0	0	100	0	0	3
GCA_001855085.1	VB1490	98.347	99.874	0	0	0	0	100	0	0	0	0	0	0	97.708	0	0	100	0	99.975	3
GCA_002260265.1	UP1073	98.463	99.93	0	0	0	0	100	0	0	0	0	0	0	97.708	0	0	100	0	0	3
GCA_002267125.1	UP72	98.463	99.78	0	0	0	0	100	0	0	0	0	0	0	97.708	0	0	100	0	0	3
GCA_002267145.1	UP81	98.463	99.78	0	0	0	0	100	0	0	0	0	0	0	97.708	0	0	100	0	0	3
GCA_002267325.1	UCL378	98.463	99.78	0	0	0	0	100	0	0	0	0	0	0	97.708	0	0	100	0	0	3
GCA_002267625.1	UB563	98.463	99.78	0	0	0	0	100	0	0	0	0	0	0	97.656	0	0	100	0	0	3
GCA_002887495.1	UB576	99.801	99.78	0	0	0	0	100	0	0	0	0	0	0	97.708	0	0	100	0	0	3
GCA_003236195.1	SAUR1404	98.463	99.93	0	0	0	0	99.048	0	0	0	0	0	0	97.708	0	0	100	0	99.968	3
GCA_003236215.1	SAUR678	98.463	99.56	0	0	0	0	0	0	0	0	0	0	0	97.708	0	0	100	0	99.968	2
GCA_003236275.1	SAUR390	98.463	99.874	0	0	0	0	100	0	0	0	0	0	0	97.708	100	0	100	0	99.972	4
GCA_003238155.1	CM123	98.345	99.872	0	0	0	0	99.863	0	0	0	0	0	0	97.708	100	0	100	0	0	4
GCA_003238515.1	CM60	98.463	99.78	0	0	0	0	100	0	0	0	0	0	0	97.708	0	0	100	0	99.989	3
GCA_003238635.1	CM45	98.345	99.78	0	0	0	0	100	0	0	0	0	0	0	97.708	0	0	100	0	99.986	3
GCA_003239575.1	CM66	98.345	99.78	0	0	0	0	100	0	0	0	0	0	0	97.708	0	0	100	0	99.982	3
GCA_003240295.1	CM18	98.345	99.78	0	0	0	0	100	0	0	0	0	0	0	97.708	0	0	100	0	99.986	3
GCA_003240325.1	CM17	98.463	99.78	0	0	0	0	100	0	0	0	0	0	0	97.708	0	100	100	0	99.989	3
GCA_003390315.1	WCH-SK2 SCV	98.463	100	0	0	0	0	99.863	0	0	0	0	0	0	97.708	0	0	100	0	99.972	3
GCA_003693065.1	CCUG 35601	98.463	100	0	0	0	0	0	0	0	0	0	0	0	97.708	0	0	100	0	99.982	2
GCA_003725455.1	VB7185	98.463	99.874	0	0	0	0	99.863	0	0	0	0	0	0	97.708	0	0	100	0	99.972	3
GCA_003989645.1	ZS_Z30	98.463	99.874	0	0	0	0	100	0	0	0	0	0	0	97.708	100	0	100	0	99.98	4
GCA_003989655.1	ZS_Z37	98.463	99.874	0	0	0	0	100	0	0	0	0	0	0	97.708	100	0	100	0	99.974	4
GCA_003989815.1	ZS_Z46	98.463	99.874	0	0	0	0	100	0	0	0	0	0	0	97.708	100	0	100	0	99.967	4
GCA_004122795.1	SAZ_10	98.463	99.93	0	0	0	0	100	0	0	0	0	0	0	97.708	100	0	100	0	99.974	4
GCA_004122975.1	SAZ_1	98.463	99.874	0	0	0	0	99.863	0	0	100	0	0	0	97.708	100	0	100	0	99.974	5
GCA_004209875.1	SA9	98.463	99.874	0	0	0	0	100	0	0	0	0	0	0	97.708	100	0	100	0	0	4
GCA_005047435.1	42 (B)	98.463	99.56	0	0	0	0	99.048	0	0	0	0	0	0	97.708	0	0	100	0	99.979	3
GCA_005047995.1	42	98.345	99.56	0	0	0	0	99.048	0	0	0	0	0	0	97.708	0	0	100	0	0	3
GCA_005048305.1	50	98.463	99.56	0	0	0	0	99.048	0	0	98.457	0	0	0	97.708	0	0	100	0	99.968	4
GCA_005048415.1	46	98.463	99.56	0	0	0	0	0	0	0	0	0	0	0	97.708	0	0	100	0	99.979	2
GCA_005116585.1	MRSA SAZ_10	98.463	100	0	0	0	0	100	0	0	0	0	0	0	97.708	100	0	100	0	99.974	4
GCA_005861165.1	YNSA163	98.345	99.93	0	0	0	0	99.048	0	0	0	0	0	0	97.656	0	0	100	0	99.961	3
GCA_005861265.1	YNSA133	98.229	99.93	0	0	0	0	0	0	0	0	0	0	0	97.656	0	0	100	0	99.965	2
GCA_005861415.1	YNSA80	98.345	99.93	0	0	0	0	99.048	0	0	100	0	0	0	97.708	0	0	100	0	99.961	4
GCA_005861875.1	YNSA147	98.345	99.93	0	0	0	0	0	0	0	0	0	0	0	97.708	0	0	100	0	99.968	2
GCA_005861895.1	YNSA110	98.345	99.93	0	0	0	0	99.048	0	0	0	0	0	0	97.708	0	0	100	0	99.968	3
GCA_900017505.1	st697	98.463	99.874	0	0	0	0	100	0	0	0	0	0	0	97.708	100	0	100	0	0	4
GCA_900043625.1	st3021	98.463	99.874	0	0	0	0	100	0	0	0	0	0	0	97.708	100	0	100	0	99.974	4
GCA_900043945.1	st27	98.463	99.872	0	0	0	0	100	0	0	0	0	0	0	97.708	100	0	100	0	99.975	4
GCA_900058615.1	st3046	98.463	99.874	0	0	0	0	100	0	0	99.244	0	0	0	97.708	100	0	100	0	99.98	5
GCA_900126315.1	3688STDY6124938	98.463	99.874	0	0	0	0	100	0	0	98.92	0	0	0	97.708	100	0	100	0	99.967	5
GCA_900127815.1	3688STDY6124822	98.463	100	0	0	0	0	100	0	0	0	0	0	0	97.656	100	0	100	0	99.968	4
GCA_900457315.1	NCTC13134	98.463	100	0	0	0	0	100	0	0	0	0	0	0	97.708	0	0	100	0	99.986	3
GCA_900457385.1	NCTC13135	98.463	99.67	0	0	0	0	99.863	0	0	0	0	0	0	97.708	0	0	100	0	99.968	3
GCA_900457505.1	NCTC11939	98.463	99.872	0	0	0	0	99.863	0	0	0	0	0	0	97.708	0	0	100	0	99.972	3
GCA_900457755.1	NCTC13626	98.345	99.874	0	0	0	0	100	0	0	0	0	0	0	97.708	100	0	100	0	99.98	4
GCA_000978705.1	LCT-SAO	98.345	100	0	0	0	0	100	0	0	0	0	0	0	97.708	0	0	100	0	99.958	3
GCA_000978725.1	LCT-SAM	98.345	100	0	0	0	0	100	0	0	0	0	0	0	97.708	0	0	100	0	99.958	3
GCA_001045615.2	#32S	98.345	99.93	0	0	0	0	0	0	0	0	0	0	0	97.656	0	0	100	0	99.954	2
GCA_001060505.1	1193_SAUR	98.463	99.874	0	0	0	0	100	0	0	0	0	0	0	97.708	100	0	100	0	0	4
GCA_001060535.1	1194_SAUR	98.463	99.874	0	0	0	0	100	0	0	0	0	0	0	97.708	100	0	100	0	0	4
GCA_001223565.1	DEU2	98.345	99.93	0	0	0	0	100	0	0	0	0	0	0	97.708	0	0	100	0	99.968	3
GCA_001225365.1	IU19	98.345	99.872	0	0	0	0	100	0	0	100	0	0	0	97.708	0	0	100	0	99.968	4
GCA_001225725.1	IU1	98.345	99.93	0	0	0	0	99.048	0	0	0	0	0	0	97.708	0	0	100	0	99.965	3
GCA_001225825.1	DEU23	98.345	99.93	0	0	0	0	0	0	0	0	0	0	0	97.708	0	0	100	0	99.968	2
GCA_001226505.1	RA6	98.463	99.78	0	0	0	0	100	0	0	0	0	0	0	97.708	0	0	100	0	99.993	3
GCA_001226865.1	MU7	98.345	99.93	0	0	0	0	100	0	0	0	0	0	0	97.708	0	0	100	0	99.972	3
GCA_001226925.1	IU12	98.345	99.93	0	0	0	0	98.99	0	0	0	0	0	0	97.708	0	0	100	0	99.968	3
GCA_001227085.1	M1229	98.463	100	0	0	0	0	100	0	0	0	0	0	0	97.708	100	0	100	0	99.975	4
GCA_001227985.1	M278	98.463	99.78	0	0	0	0	100	0	0	0	0	0	0	97.708	0	0	100	0	99.993	3
GCA_001228725.1	DEU6	98.345	99.93	0	0	0	0	99.048	0	0	0	0	0	0	97.708	0	0	100	0	99.965	3
GCA_001229265.1	MU3	98.345	100	0	0	0	0	99.048	0	0	0	0	0	0	97.708	0	0	100	0	99.968	3
GCA_001229905.1	MAL119	98.463	99.874	0	0	0	0	100	0	0	0	0	0	0	97.656	100	0	100	0	99.98	4
GCA_001230885.1	IU4	98.345	99.93	0	0	0	0	100	0	0	0	0	0	0	97.708	0	0	100	0	99.954	3
GCA_001231365.1	IU7	98.345	99.93	0	0	0	0	99.048	0	0	0	0	0	0	97.708	0	0	100	0	99.961	3
GCA_001232225.1	LIT89	98.463	100	0	0	0	0	100	0	0	0	0	0	0	97.708	0	0	100	0	99.986	3
GCA_001232385.1	United Kingdom102	98.463	99.872	0	0	0	0	100	0	0	0	0	0	0	97.708	100	0	100	0	99.982	4
GCA_001232525.1	MU6	98.345	99.93	0	0	0	0	0	0	0	0	0	0	0	97.708	0	0	100	0	99.95	2
GCA_001234105.1	MU10	98.345	99.93	0	0	0	0	98.913	0	0	0	0	0	0	97.708	0	0	100	0	99.968	3
GCA_001234465.1	DEU19	98.345	99.93	0	0	0	0	99.863	0	0	0	0	0	0	97.708	0	0	100	0	99.961	3
GCA_001234785.1	IU6	98.345	99.93	0	0	0	0	0	0	0	0	0	0	0	97.708	0	0	100	0	99.965	2
GCA_001235385.1	H202	98.463	99.874	0	0	0	0	100	0	0	0	0	0	0	97.708	100	0	100	0	0	4
GCA_001235465.1	DEU14	98.345	99.93	0	0	0	0	98.785	0	0	0	0	0	0	97.656	0	0	100	0	99.965	3
GCA_001235485.1	MU9	95.139	99.872	0	0	0	0	0	0	0	0	0	0	0	97.708	0	0	100	0	0	2
GCA_001236045.1	HU17	98.345	99.93	0	0	0	0	98.234	0	0	0	0	0	0	97.708	0	0	100	0	99.968	3
GCA_001236265.1	HU7	98.345	99.93	0	0	0	0	0	0	0	0	0	0	0	97.708	0	0	100	0	99.968	2
GCA_001237525.1	MAL9	98.463	99.874	0	0	0	0	100	0	0	0	0	0	0	97.708	100	0	100	0	99.98	4
GCA_001237845.1	D71	98.463	100	0	0	0	0	100	0	0	0	0	0	0	97.708	0	0	100	0	99.975	3
GCA_001239185.1	LIT76	98.463	100	0	0	0	0	100	0	0	100	0	0	0	97.708	0	0	100	0	99.982	4
GCA_001239245.1	HU9	98.345	99.93	0	0	0	0	0	0	0	0	0	0	0	97.708	0	0	100	0	99.965	2
GCA_001239465.1	H211	98.463	99.874	0	0	0	0	100	0	0	0	0	0	0	97.708	100	0	100	0	0	4
GCA_001239705.1	MAL3	98.463	99.874	0	0	0	0	100	0	0	0	0	0	0	97.708	100	0	100	0	99.98	4
GCA_001652195.1	NMR02	98.463	99.874	0	0	0	0	100	0	0	0	0	0	0	97.708	0	0	100	0	99.982	3
GCA_002738565.1	smg07	98.463	99.874	0	0	0	0	100	0	0	100	0	0	0	97.656	100	0	100	0	99.972	5
GCA_003261195.1	0943-1505-2016	98.345	99.93	0	0	0	0	0	0	0	0	0	0	0	97.708	0	0	100	0	99.953	2
GCA_005861185.1	YNSA153	98.345	99.93	0	0	0	0	99.048	0	0	0	0	0	0	97.708	0	0	100	0	99.965	3
GCA_005861215.1	YNSA148	98.345	99.93	0	0	0	0	99.048	0	0	0	0	0	0	97.708	0	0	100	0	99.961	3
GCA_005861335.1	YNSA109	98.345	100	0	0	0	0	100	0	0	0	0	0	0	97.656	0	0	100	0	99.965	3
GCA_005861365.1	YNSA98	98.345	99.93	0	0	0	0	0	0	0	0	0	0	0	97.708	0	0	100	0	99.965	2
GCA_005861385.1	YNSA93	98.345	99.93	0	0	0	0	99.048	0	0	0	0	0	0	97.656	0	0	100	0	99.965	3
GCA_005861435.1	YNSA86	98.345	99.93	0	0	0	0	99.048	0	0	100	0	0	0	97.708	0	0	100	0	99.968	4
GCA_005861465.1	YNSA73	98.345	99.93	0	0	0	0	0	0	0	0	0	0	0	97.656	0	0	100	0	99.965	2
GCA_005861855.1	YNSA125	98.345	99.93	0	0	0	0	99.048	0	0	0	0	0	0	97.708	0	0	100	0	99.961	3
GCA_005861925.1	YNSA94	98.345	99.93	0	0	0	0	0	0	0	0	0	0	0	97.656	0	0	100	0	99.965	2
GCA_900067275.1	TW20	98.345	99.874	0	0	0	0	100	0	0	0	0	0	0	97.708	100	0	100	0	99.98	4
GCA_900125395.1	3688STDY6124817	98.463	99.874	0	0	0	0	100	0	0	0	0	0	0	97.656	100	0	100	0	99.968	4
GCA_900126265.1	3688STDY6124933	98.463	99.874	0	0	0	0	100	0	0	0	0	0	0	97.656	100	0	99.8	0	99.961	4
GCA_900126375.1	3688STDY6124945	98.463	99.874	0	0	0	0	100	0	0	0	0	0	0	97.708	100	0	100	0	99.982	4
GCA_900126455.1	3688STDY6124955	98.463	99.874	0	0	0	0	100	0	0	0	0	0	0	97.708	100	0	100	0	99.975	4
GCA_900250845.1	M2863	98.463	99.874	0	0	0	0	100	0	0	0	0	0	0	97.708	100	0	100	0	99.98	4
GCA_001641045.1	V605	98.463	99.874	0	0	0	0	100	0	0	0	0	0	0	97.656	100	0	100	0	99.98	4
GCA_000312965.1	PPUKM-261-2009	98.463	99.623	0	0	0	0	100	0	0	0	0	0	0	97.708	100	0	100	0	99.941	4
GCA_000312985.1	PPUKM-332-2009	98.463	99.874	0	0	0	0	100	0	0	100	0	0	0	97.708	100	0	100	0	99.961	5
GCA_000978715.1	LCT-SAG	98.345	100	0	0	0	0	100	0	0	0	0	0	0	99.732	0	0	100	0	99.959	3
GCA_000978745.1	LCT-SAS	98.307	100	0	0	0	0	100	0	0	0	0	0	0	96.961	0	0	100	0	99.966	3

## Sheet: USA500
Assembly	Strain	beta-lactam	aminoglycoside	colistin	fosfomycin	fusidicacid	glycopeptide	macrolide	nitroimidazole	oxazolidinone	phenicol	quinolone	rifampicin	sulphonamide	tetracycline	trimethoprim	ardA-H2	ardA-H1	Tn916	Tn5801	Resistance without bl
GCA_000746505.1	2395 USA500	98.463	100	0	0	0	0	0	0	0	0	0	0	0	97.656	0	0	99.8	0	99.904	2
GCA_001021875.1	M121	97.991	0	0	0	0	0	0	0	0	0	0	0	0	0	0	0	0	0	0	0
GCA_001021895.1	CA15	97.991	0	0	0	0	0	0	0	0	0	0	0	0	0	0	0	0	0	0	0
GCA_001045715.1	C679	97.991	0	0	0	0	0	0	0	0	0	0	0	0	0	0	0	0	0	0	0
GCA_001045745.1	M120	97.991	0	0	0	0	0	0	0	0	0	0	0	0	99.928	0	0	0	0	0	1
GCA_001045775.1	HUV03	97.991	100	0	0	0	0	0	0	0	0	0	0	0	99.928	0	0	0	0	0	2
GCA_001045805.1	C123	99.173	0	0	0	0	0	0	0	0	0	0	0	0	99.928	0	0	0	0	0	1
GCA_001045835.1	C1667	97.991	0	0	0	0	0	0	0	0	0	0	0	0	0	0	0	0	0	0	0
GCA_001045855.1	C1675	97.991	0	0	0	0	0	0	0	0	0	0	0	0	99.928	0	0	0	0	0	1
GCA_001045865.1	E396	97.991	0	0	0	0	0	0	0	0	0	0	0	0	0	0	0	0	0	0	0
GCA_001045895.1	C1058	97.991	0	0	0	0	0	0	0	0	0	0	0	0	99.928	0	0	0	0	0	1
GCA_001045905.1	C186	97.991	0	0	0	0	0	0	0	0	0	0	0	0	0	0	0	0	0	0	0
GCA_001045935.1	C329	97.991	0	0	0	0	0	0	0	0	0	0	0	0	99.896	0	0	0	0	0	1
GCA_001045955.1	E404	97.991	0	0	0	0	0	0	0	0	0	0	0	0	0	0	0	0	0	0	0
GCA_001045975.1	M109	97.991	0	0	0	0	0	99.048	0	0	0	0	0	0	0	0	0	0	0	0	1
GCA_001046015.1	CA17	97.991	0	0	0	0	0	0	0	0	0	0	0	0	0	0	0	0	0	0	0
GCA_001046055.1	CA14	97.991	0	0	0	0	0	0	0	0	0	0	0	0	0	0	0	0	0	0	0
GCA_001046255.1	HUV01	97.991	0	0	0	0	0	0	0	0	0	0	0	0	100	0	0	0	0	0	1
GCA_001046265.1	HUV07	99.884	0	0	0	0	0	0	0	0	0	0	0	0	0	0	0	0	0	0	0
GCA_001046295.1	C2485	99.9	0	0	0	0	0	0	0	0	0	0	0	0	0	0	0	0	0	0	0
GCA_001047875.1	USFL002	97.991	0	0	0	0	0	99.184	0	0	0	0	0	0	100	0	0	0	0	0	2
GCA_001062115.1	1159_SAUR	95.626	0	0	0	0	0	0	0	0	0	0	0	0	0	0	0	0	0	0	0
GCA_001062155.1	1174_SAUR	95.626	0	0	0	0	0	0	0	0	0	0	0	0	0	0	0	0	0	0	0
GCA_001066025.1	717_SAUR	98.463	0	0	0	0	0	0	0	0	0	0	0	0	0	100	0	0	0	0	1
GCA_001067055.1	714_SAUR	98.463	0	0	0	0	0	0	0	0	0	0	0	0	0	100	0	0	0	0	1
GCA_001194885.1	USFL051	98.463	0	0	0	0	0	99.048	0	0	0	0	0	0	0	100	0	0	0	0	2
GCA_001195925.1	USFL335	97.991	0	0	0	0	0	0	0	0	0	0	0	0	0	0	0	0	0	0	0
GCA_001199655.1	USFL052	98.463	0	0	0	0	0	99.048	0	0	0	0	0	0	0	100	0	0	0	0	2
GCA_001200275.1	USFL246	99.764	0	0	0	0	0	0	0	0	0	0	0	0	0	0	0	0	0	0	0
GCA_001203915.1	USFL143	99.764	0	0	0	0	0	0	0	0	0	0	0	0	0	0	0	0	0	0	0
GCA_001208345.1	USFL040	99.95	0	0	0	0	0	0	0	0	0	0	0	0	0	0	0	0	0	0	0
GCA_001209005.1	USFL225	99.882	100	0	0	0	0	98.978	0	0	0	0	0	0	0	0	0	0	0	0	2
GCA_001210945.1	USFL073	98.463	0	0	0	0	0	0	0	0	0	0	0	0	0	100	0	0	0	0	1
GCA_001210985.1	USFL072	98.463	0	0	0	0	0	0	0	0	0	0	0	0	0	100	0	0	0	0	1
GCA_001212005.1	USFL245	97.991	0	0	0	0	0	0	0	0	0	0	0	0	0	0	0	0	0	0	0
GCA_001212445.1	USFL254	97.991	0	0	0	0	0	0	0	0	0	0	0	0	0	0	0	0	0	0	0
GCA_001287985.1	2588STDY5748949	98.463	0	0	0	0	0	0	0	0	0	0	0	0	0	100	0	0	0	0	1
GCA_001288165.1	2588STDY5763888	98.463	0	0	0	0	0	99.048	0	0	0	0	0	0	0	100	0	0	0	0	2
GCA_001288445.1	2588STDY5748117	98.463	100	0	0	0	0	99.048	0	0	0	0	0	0	0	100	0	0	0	0	3
GCA_001288465.1	2588STDY5627569	99.409	0	0	0	0	0	99.184	0	0	0	0	0	0	0	0	0	0	0	0	1
GCA_001289005.1	2588STDY5627600	98.463	0	0	0	0	0	0	0	0	0	0	0	0	0	100	0	0	0	0	1
GCA_001289405.1	2588STDY5748061	95.626	0	0	0	0	0	0	0	0	0	0	0	0	0	0	0	0	0	0	0
GCA_001289605.1	2588STDY5748679	98.463	100	0	0	0	0	99.184	0	0	0	0	0	0	97.656	0	0	100	0	99.89	3
GCA_001289665.1	2588STDY5748906	99.9	100	0	0	0	0	99.184	0	0	0	0	0	0	97.656	0	0	100	0	99.89	3
GCA_001289925.1	2588STDY5748941	98.463	0	0	0	0	0	0	0	0	0	0	0	0	0	100	0	0	0	0	1
GCA_001290105.1	2588STDY5627518	99.9	100	0	0	0	0	99.184	0	0	0	0	0	0	97.604	0	0	100	0	99.882	3
GCA_001290525.1	2588STDY5748881	99.9	100	0	0	0	0	99.048	0	0	0	0	0	0	97.656	0	0	99.8	0	99.904	3
GCA_001290565.1	2588STDY5747520	0	0	0	0	0	0	0	0	0	0	0	0	0	0	0	0	0	0	0	0
GCA_001291025.1	2588STDY5748909	98.463	0	0	0	0	0	99.048	0	0	0	0	0	0	0	100	0	0	0	0	2
GCA_001351655.1	USFL060	97.991	0	0	0	0	0	99.184	0	0	0	0	0	0	100	0	0	0	0	0	2
GCA_001352015.1	USFL013	99.764	99.874	0	0	0	0	98.978	0	0	0	0	0	0	0	100	0	0	0	0	3
GCA_001352375.1	USFL226	99.882	100	0	0	0	0	98.978	0	0	0	0	0	0	0	0	0	0	0	0	2
GCA_001352495.1	USFL017	97.991	0	0	0	0	0	99.184	0	0	0	0	0	0	100	0	0	0	0	0	2
GCA_001352975.1	USFL236	99.882	100	0	0	0	0	98.978	0	0	0	0	0	0	0	0	0	0	0	0	2
GCA_001353175.1	USFL247	99.764	0	0	0	0	0	0	0	0	0	0	0	0	0	0	0	0	0	0	0
GCA_001353335.1	USFL022	98.463	0	0	0	0	0	99.048	0	0	0	0	0	0	0	100	0	0	0	0	2
GCA_001353515.1	USFL128	99.764	0	0	0	0	0	0	0	0	0	0	0	0	0	0	0	0	0	0	0
GCA_001353815.1	USFL146	99.95	100	0	0	0	0	99.048	0	0	0	0	0	0	0	100	0	0	0	0	3
GCA_001353955.1	USFL145	99.409	0	0	0	0	0	0	0	0	0	0	0	0	0	0	0	0	0	0	0
GCA_001354355.1	FL381	99.882	100	0	0	0	0	98.978	0	0	0	0	0	0	0	0	0	0	0	0	2
GCA_001354395.1	FL380	99.882	100	0	0	0	0	98.978	0	0	0	0	0	0	0	0	0	0	0	0	2
GCA_001045795.2	CA12	97.991	0	0	0	0	0	0	0	0	0	0	0	0	0	0	0	0	0	0	0
GCA_001469995.1	UC50	95.745	0	0	0	0	0	0	0	0	0	0	0	0	0	0	0	0	0	0	0
GCA_900019045.1	st16	98.463	100	0	0	0	0	100	0	0	0	0	0	0	0	0	0	0	0	0	2
GCA_900020265.1	st509	98.463	99.78	0	0	0	0	99.863	0	0	0	0	0	0	0	0	0	0	0	0	2
GCA_900020355.1	st988	98.463	99.869	0	0	0	0	99.863	0	0	0	0	0	0	0	0	0	0	0	0	2
GCA_900043655.1	st860	98.463	99.78	0	0	0	0	100	0	0	0	0	0	0	0	0	0	0	0	0	2
GCA_900045535.1	st51	98.463	99.78	0	0	0	0	100	0	0	0	0	0	0	0	0	0	0	0	0	2
GCA_900018765.1	st23	98.463	99.78	0	0	0	0	100	0	0	0	0	0	0	0	0	0	0	0	0	2
GCA_900040885.1	st859	99.95	99.78	0	0	0	0	100	0	0	0	0	0	0	0	0	0	0	0	0	2
GCA_900047165.1	st297	98.463	99.78	0	0	0	0	100	0	0	0	0	0	0	0	0	0	0	0	0	2
GCA_900047485.1	st110	98.463	99.67	0	0	0	0	99.863	0	0	0	0	0	0	0	0	0	0	0	0	2
GCA_900046205.1	st1831	98.463	99.78	0	0	0	0	100	0	0	0	0	0	0	0	0	0	0	0	0	2
GCA_900043575.1	st2921	98.463	99.78	0	0	0	0	99.863	0	0	0	0	0	0	0	0	0	0	0	0	2
GCA_001680995.1	Sa14-002	95.863	0	0	0	0	0	0	0	0	0	0	0	0	0	0	0	0	0	0	0
GCA_900097275.1	type strain: MRSA579	99.9	99.78	0	0	0	0	99.863	0	0	0	0	0	0	97.708	0	0	100	0	99.912	3
GCA_900097305.1	MRSA073B	98.463	0	0	0	0	0	0	0	0	0	0	0	0	0	100	0	0	0	0	1
GCA_900097395.1	MRSA 197 T(A)	99.9	99.78	0	0	0	0	99.863	0	0	100	0	0	0	97.708	0	0	100	0	99.912	4
GCA_900097415.1	MRSA40B	99.9	99.78	0	0	0	0	0	0	0	100	0	0	0	97.708	0	0	100	0	99.912	3
GCA_900097535.1	type strain: MRSA176	99.9	100	0	0	0	0	99.863	0	0	100	0	0	0	97.708	0	0	100	0	99.912	4
GCA_900097605.1	MRSA609	98.463	0	0	0	0	0	99.048	0	0	0	0	0	0	0	100	0	0	0	0	2
GCA_900097625.1	type strain: MRSA659	99.9	99.78	0	0	0	0	99.863	0	0	100	0	0	0	97.708	0	0	100	0	99.912	4
GCA_900097845.1	type strain: MSSA120	98.463	0	0	0	0	0	99.048	0	0	0	0	0	0	99.928	100	0	0	0	0	3
GCA_900097875.1	MSSAT143	98.463	0	0	0	0	0	99.048	0	0	0	0	0	0	99.88	100	0	0	0	0	3
GCA_900097935.1	MSSAT120	98.463	0	0	0	0	0	99.048	0	0	0	0	0	0	99.928	100	0	0	0	0	3
GCA_002097115.1	723	99.9	100	0	0	0	0	99.048	0	0	0	0	0	0	97.708	0	0	100	0	0	3
GCA_002097135.1	673	99.9	100	0	0	0	0	98.985	0	0	0	0	0	0	97.708	0	0	100	0	0	3
GCA_002097165.1	580	99.9	100	0	0	0	0	0	0	0	0	0	0	0	97.708	0	0	99.8	0	0	2
GCA_002097445.1	612	98.463	100	0	0	0	0	0	0	0	0	0	0	0	100	100	0	0	0	0	3
GCA_002097075.1	734	99.9	100	0	0	0	0	99.048	0	0	0	0	0	0	97.656	0	0	100	0	0	3
GCA_002097125.1	58	99.9	100	0	0	0	0	0	0	0	0	0	0	0	97.708	0	0	100	0	0	2
GCA_002210005.1	H7/16	98.463	100	0	0	0	0	100	0	0	0	0	0	0	0	0	0	0	0	0	2
GCA_002260075.1	UC309	97.991	0	0	0	0	0	0	0	0	0	0	0	0	0	0	0	0	0	0	0
GCA_002260105.1	UC312	97.991	0	0	0	0	0	0	0	0	0	0	0	0	0	0	0	0	0	0	0
GCA_002260145.1	UC622	97.991	0	0	0	0	0	0	0	0	0	0	0	0	0	0	0	0	0	0	0
GCA_002260345.1	UE220	97.991	0	0	0	0	0	0	0	0	0	94.04	0	0	0	0	0	0	0	0	1
GCA_002267065.1	UC51	95.745	0	0	0	0	0	0	0	0	0	0	0	0	0	0	0	0	0	0	0
GCA_002267105.1	UC151	97.991	0	0	0	0	0	0	0	0	100	0	0	0	0	0	0	0	0	0	1
GCA_002267205.1	UE181	97.991	0	0	0	0	0	0	0	0	0	0	0	0	0	0	0	0	0	0	0
GCA_002267265.1	UE232	97.991	0	0	0	0	0	0	0	0	0	0	0	0	0	0	0	0	0	0	0
GCA_002267285.1	UC311	97.991	0	0	0	0	0	0	0	0	0	0	0	0	0	0	0	0	0	0	0
GCA_002267345.1	UE201	97.991	0	0	0	0	0	0	0	0	0	0	0	0	0	0	0	0	0	0	0
GCA_002267425.1	UV185	99.9	100	0	0	0	0	0	0	0	0	0	0	0	97.656	0	0	99.8	0	0	2
GCA_002267445.1	UE203	97.991	0	0	0	0	0	0	0	0	0	0	0	0	0	100	0	0	0	0	1
GCA_002267485.1	UE206	99.95	0	0	0	0	0	0	0	0	0	0	0	0	0	0	0	0	0	0	0
GCA_002267525.1	UC313	99.95	0	0	0	0	0	0	0	0	0	0	0	0	0	0	0	0	0	0	0
GCA_002267565.1	UC334	97.991	0	0	0	0	0	0	0	0	0	0	0	0	0	0	0	0	0	0	0
GCA_002267575.1	UC325	97.991	0	0	0	0	0	0	0	0	0	0	0	0	0	0	0	0	0	0	0
GCA_002267745.1	UC623	97.991	0	0	0	0	0	0	0	0	0	0	0	0	0	0	0	0	0	0	0
GCA_002267825.1	UC916	99.95	0	0	0	0	0	0	0	0	0	0	0	0	0	0	0	0	0	0	0
GCA_002267905.1	UC1001	97.991	0	0	0	0	0	0	0	0	0	0	0	0	0	0	0	0	0	0	0
GCA_002355355.1	OC8	0	0	0	0	0	0	0	0	0	0	0	0	0	0	0	0	0	0	0	0
GCA_002607665.1	P333	99.95	0	0	0	0	0	0	0	0	0	0	0	0	0	0	0	0	0	0	0
GCA_002607725.1	Ab333	99.95	0	0	0	0	0	0	0	0	0	0	0	0	0	0	0	0	0	0	0
GCA_002887295.1	UA757	99.882	0	0	0	0	0	99.048	0	0	0	0	0	0	0	0	0	0	0	0	1
GCA_001018795.2	FDAARGOS_18	98.463	100	0	0	0	99.962	0	0	0	0	0	0	0	0	0	0	0	0	0	2
GCA_001019195.2	FDAARGOS_49	98.463	100	0	0	0	0	0	0	0	0	0	0	0	97.656	0	0	99.8	0	99.904	2
GCA_001019295.2	FDAARGOS_8	99.95	99.869	0	0	0	0	99.94	0	0	0	0	0	0	0	0	0	0	0	0	2
GCA_900250305.1	H1305	97.991	0	0	0	0	0	0	0	0	0	0	0	0	0	0	0	0	0	0	0
GCA_900250425.1	H1445	97.991	0	0	0	0	0	0	0	0	0	0	0	0	0	0	0	0	0	0	0
GCA_900250625.1	H1675	97.991	0	0	0	0	0	0	0	0	0	0	0	0	0	0	0	0	0	0	0
GCA_900251365.1	M3423	97.991	0	0	0	0	0	0	0	0	0	0	0	0	0	0	0	0	0	0	0
GCA_900251775.1	M3823	97.991	0	0	0	0	0	0	0	0	0	0	0	0	0	0	0	0	0	0	0
GCA_900252075.1	M3972	97.991	0	0	0	0	0	0	0	0	0	0	0	0	0	0	0	0	0	0	0
GCA_900252085.1	RH148	97.991	0	0	0	0	0	0	0	0	0	0	0	0	0	0	0	0	0	0	0
GCA_900252215.1	RH238	97.991	0	0	0	0	0	0	0	0	0	0	0	0	0	0	0	0	0	0	0
GCA_001018685.2	TCH 959	0	0	0	0	0	0	0	0	0	0	0	0	0	0	0	0	0	0	0	0
GCA_001019485.2	NRS120	98.463	99.869	0	0	0	0	0	0	0	0	0	0	0	97.656	0	0	100	0	99.904	2
GCA_003055745.1	N3	99.882	0	0	0	0	0	99.048	0	0	0	0	0	0	0	0	0	0	0	0	1
GCA_003055775.1	N3a	99.882	0	0	0	0	0	99.048	0	0	0	0	0	0	0	0	0	0	0	0	1
GCA_003055785.1	N3b	0	0	0	0	0	0	0	0	0	0	0	0	0	0	0	0	0	0	0	0
GCA_003111725.1	SVH7513	98.463	0	0	0	0	0	99.048	0	0	0	0	0	0	97.708	0	0	100	0	99.912	2
GCA_003238205.1	CM110	99.851	99.869	0	0	0	0	99.863	0	0	0	0	0	0	0	0	0	0	0	0	2
GCA_003239815.1	CM80	99.95	0	0	0	0	0	0	0	0	0	0	0	0	0	0	0	0	0	0	0
GCA_003240235.1	CM33	99.95	99.869	0	0	0	0	0	0	0	0	0	0	0	0	0	0	0	0	0	1
GCA_003240395.1	CM3	97.991	99.869	0	0	0	0	0	0	0	98.457	0	0	0	0	0	0	0	0	0	2
GCA_900474525.1	NCTC13394	0	0	0	0	0	0	0	0	0	0	0	0	0	0	0	0	0	0	0	0
GCA_900474725.1	NCTC13140	99.851	99.78	0	0	99.218	0	0	0	0	0	0	0	0	100	0	100	0	99.911	0	3
GCA_003260525.1	AR_0221	98.463	100	0	0	0	0	0	0	0	0	0	0	0	97.656	0	0	100	0	99.897	2
GCA_900482605.1	EOE015	98.463	100	0	0	99.218	0	99.863	0	0	0	0	0	0	100	0	100	0	99.911	0	4
GCA_900457445.1	NCTC13133	97.991	99.78	0	0	0	0	100	0	0	0	0	0	0	100	0	100	0	99.917	0	3
GCA_900457485.1	NCTC13139	97.991	100	0	0	99.218	0	99.863	0	0	0	0	0	0	100	0	100	0	99.911	0	4
GCA_900457685.1	NCTC9369	97.991	0	0	0	0	0	0	0	0	0	0	0	0	0	0	0	0	0	0	0
GCA_900458095.1	NCTC10652	97.872	0	0	0	0	0	0	0	0	0	0	0	0	0	0	0	0	0	0	0
GCA_003354665.1	165	99.9	99.78	0	0	0	0	0	0	0	0	0	0	0	99.792	0	100	0	99.834	0	2
GCA_003354805.1	54	0	0	0	0	0	0	0	0	0	0	0	0	0	0	0	0	0	0	0	0
GCA_003354885.1	164	0	0	0	0	0	0	0	0	0	0	0	0	0	0	0	0	0	0	0	0
GCA_003354945.1	545	98.463	99.78	0	0	0	0	0	0	0	0	0	0	0	99.792	0	100	0	99.834	0	2
GCA_003354965.1	546	98.463	99.78	0	0	0	0	0	0	0	0	0	0	0	99.792	0	100	0	99.834	0	2
GCA_900458125.1	NCTC10702	98.463	99.45	0	0	0	0	100	0	0	0	0	0	0	97.3	0	0	100	0	99.715	3
GCA_900458325.1	NCTC10703	98.463	99.78	0	0	0	0	100	0	0	0	0	0	0	97.708	0	0	100	0	99.907	3
GCA_900458335.1	NCTC13141	0	99.78	0	0	0	0	0	0	0	0	0	0	0	100	0	100	0	99.911	0	2
GCA_900458405.1	NCTC10443	99.9	0	0	0	0	0	0	0	0	0	0	0	0	100	0	0	0	0	0	1
GCA_003417365.1	M1C036	95.626	0	0	0	0	0	0	0	0	0	0	0	0	0	0	0	0	0	0	0
GCA_003417855.1	M1C055	95.626	100	0	0	0	0	99.863	0	0	0	0	0	0	0	0	0	0	0	0	2
GCA_003418565.1	M1K007	95.626	100	0	0	0	0	99.727	0	0	0	0	0	0	0	0	0	0	0	0	2
GCA_003419145.1	M1K037	99.882	100	0	0	0	0	100	0	0	0	0	0	0	0	0	0	0	0	0	2
GCA_003419465.1	M1K091	0	0	0	0	0	0	0	0	0	0	0	0	0	0	0	0	0	0	0	0
GCA_003421485.1	M6K037	99.882	100	0	0	0	0	100	0	0	0	0	0	0	0	0	0	0	0	0	2
GCA_003421725.1	M6K066	97.991	100	0	0	0	0	100	0	0	0	0	0	0	99.323	0	100	0	99.823	0	3
GCA_003422405.1	M6K139	99.882	100	0	0	0	0	100	0	0	0	0	0	0	0	0	0	0	0	0	2
GCA_003425545.1	199	95.626	0	0	0	100	0	0	0	0	0	0	0	0	100	0	0	0	0	0	2
GCA_003425915.1	64	95.626	0	0	0	100	0	0	0	0	0	0	0	0	100	0	0	0	0	0	2
GCA_003571225.1	STV658L	97.991	0	0	0	0	0	0	0	0	0	0	0	0	0	0	0	0	0	0	0
GCA_003571245.1	STV209L	97.991	0	0	0	0	0	0	0	0	0	0	0	0	0	0	0	0	0	0	0
GCA_003571265.1	STV563L	97.991	0	0	0	0	0	0	0	0	0	0	0	0	0	0	0	0	0	0	0
GCA_003571275.1	STV101L	97.991	0	0	0	0	0	0	0	0	0	0	0	0	0	0	0	0	0	0	0
GCA_003571305.1	STV073L	97.991	0	0	0	0	0	0	0	0	0	0	0	0	100	0	0	0	0	0	1
GCA_003720875.1	BCH-SA-13	99.882	0	0	0	0	0	0	0	0	0	0	0	0	0	0	0	0	0	0	0
GCA_003788945.1	KL308	97.991	0	0	0	0	0	0	0	0	0	0	0	0	0	0	0	0	0	0	0
GCA_003798185.1	MSSA54	0	0	0	0	0	0	0	0	0	0	0	0	0	0	0	0	0	0	0	0
GCA_900620255.1	BPH2986	99.882	99.874	0	0	0	0	98.978	0	0	0	0	0	0	0	0	0	0	0	0	2
GCA_004193875.1	C3948	0	0	0	0	0	0	0	0	0	0	0	0	0	0	0	0	0	0	0	0
GCA_005705635.1	R46	98.463	99.869	0	0	0	0	99.048	0	0	0	0	0	0	0	100	0	0	0	0	3
GCA_005706035.1	P10	98.463	99.78	0	0	0	0	99.048	0	0	0	0	0	0	100	100	0	0	0	0	4
GCA_005889995.1	J01	99.882	99.874	0	0	0	0	98.912	0	0	0	0	0	0	0	100	0	0	0	0	3
GCA_000171435.1	930918-3	98.463	99.78	0	0	0	0	99.863	0	0	0	0	0	0	0	100	0	0	0	0	3
GCA_000175475.1	A9765	99.9	100	0	0	0	0	99.048	0	0	0	0	0	0	97.656	0	0	99.8	0	0	3
GCA_000171455.1	D30	0	0	0	0	0	0	0	0	0	0	0	0	0	0	0	0	0	0	0	0
GCA_000601545.1	F16108	99.882	99.874	0	0	0	0	0	0	0	0	0	0	0	0	0	0	0	0	0	1
GCA_000587755.1	F26051	98.109	99.874	0	0	0	0	99.048	0	0	0	0	0	0	97.656	0	0	99.8	0	99.897	3
GCA_000570355.1	F36687	99.882	100	0	0	0	0	98.978	0	0	0	0	0	0	100	0	0	0	0	0	3
GCA_000606265.1	F48603	99.882	99.874	0	0	0	0	98.978	0	0	0	0	0	0	0	0	0	0	0	0	2
GCA_000602765.1	F48607	99.882	99.874	0	0	0	0	98.978	0	0	0	0	0	0	0	0	0	0	0	0	2
GCA_000602785.1	F48611	99.882	99.874	0	0	0	0	98.978	0	0	0	0	0	0	0	0	0	0	0	0	2
GCA_000577305.1	F53393	99.882	100	0	0	0	0	98.978	0	0	0	0	0	0	100	0	0	0	0	0	3
GCA_000576835.1	F80354	99.95	0	0	0	0	0	0	0	0	0	0	0	0	0	0	0	0	0	0	0
GCA_000597085.1	F85609	99.95	100	0	0	0	0	98.978	0	0	0	0	0	0	100	0	0	0	0	0	3
GCA_000559805.1	H19520	99.95	0	0	0	0	0	0	0	0	0	0	0	0	0	0	0	0	0	0	0
GCA_000561345.1	H27761	99.95	99.874	0	0	0	0	98.978	0	0	0	0	0	0	0	0	0	0	0	0	2
GCA_000593785.1	H37235	99.95	0	0	0	0	0	0	0	0	0	0	0	0	0	0	0	0	0	0	0
GCA_000577085.1	H41336	98.109	99.874	0	0	0	0	99.048	0	0	0	0	0	0	97.656	0	0	99.8	0	99.897	3
GCA_000587515.1	H65881	98.463	100	0	0	0	0	99.383	0	0	0	0	0	0	0	100	0	0	0	0	3
GCA_000587495.1	H65882	98.463	100	0	0	0	0	99.383	0	0	0	0	0	0	0	100	0	0	0	0	3
GCA_000587475.1	H65883	98.463	100	0	0	0	0	99.383	0	0	0	0	0	0	0	100	0	0	0	0	3
GCA_000565095.1	H79477	99.9	100	0	0	0	0	0	0	0	0	0	0	0	97.656	0	0	99.8	0	99.897	2
GCA_000531375.1	M0002	98.463	99.869	0	0	0	0	0	0	0	0	0	0	0	97.656	0	0	100	0	99.897	2
GCA_000550885.1	M0007	98.463	0	0	0	0	0	0	0	0	0	0	0	0	97.656	0	0	100	0	99.897	1
GCA_000550905.1	M0008	98.463	0	0	0	0	0	0	0	0	0	0	0	0	97.656	0	0	100	0	99.897	1
GCA_000531615.1	M0047	98.463	99.869	0	0	0	0	0	0	0	0	0	0	0	97.656	0	0	100	0	99.897	2
GCA_000360045.1	M0055	98.463	100	0	0	0	0	99.048	0	0	0	0	0	0	0	0	0	0	0	0	2
GCA_000531665.1	M0059	99.95	99.869	0	0	0	0	0	0	0	0	0	0	0	97.656	0	0	100	0	99.897	2
GCA_000551805.1	M0080	99.95	99.869	0	0	0	0	99.048	0	0	0	0	0	0	97.656	0	0	100	0	99.897	3
GCA_000531775.1	M0088	98.463	99.869	0	0	0	0	0	0	0	0	0	0	0	97.656	0	0	100	0	99.897	2
GCA_000552065.1	M0097	99.95	99.869	0	0	0	0	0	0	0	0	0	0	0	97.656	0	0	100	0	99.897	2
GCA_000552125.1	M0100	99.95	99.869	0	0	0	0	99.048	0	0	0	0	0	0	97.656	0	0	100	0	99.897	3
GCA_000552145.1	M0101	99.95	99.869	0	0	0	0	0	0	0	0	0	0	0	97.656	0	0	100	0	99.897	2
GCA_000552165.1	M0107	99.95	99.869	0	0	0	0	0	0	0	0	0	0	0	97.656	0	0	100	0	99.897	2
GCA_000552185.1	M0109	99.95	99.869	0	0	0	0	99.048	0	0	0	0	0	0	97.656	0	0	100	0	99.897	3
GCA_000552225.1	M0111	99.95	99.869	0	0	0	0	99.048	0	0	0	0	0	0	97.656	0	0	100	0	99.897	3
GCA_000531855.1	M0113	99.95	99.869	0	0	0	0	0	0	0	0	0	0	0	97.656	0	0	100	0	99.897	2
GCA_000552405.1	M0123	98.463	99.869	0	0	0	0	0	0	0	0	0	0	0	97.656	0	0	100	0	99.897	2
GCA_000553325.1	M0186	98.463	99.869	0	0	0	0	0	0	0	0	0	0	0	97.656	0	0	100	0	99.897	2
GCA_000360465.1	M0221	98.463	99.869	0	0	0	0	0	0	0	0	0	0	0	97.656	0	0	100	0	99.897	2
GCA_000530635.1	M0284	98.463	0	0	0	0	0	0	0	0	0	0	0	0	97.656	0	0	100	0	99.897	1
GCA_000360725.1	M0312	98.463	99.869	0	0	0	0	99.048	0	0	0	0	0	0	97.656	0	0	100	0	99.904	3
GCA_000554865.1	M0337	99.95	99.869	0	0	0	0	99.048	0	0	0	0	0	0	97.656	0	0	100	0	99.904	3
GCA_000360845.1	M0340	98.463	0	0	0	0	0	99.044	0	0	0	0	0	0	97.656	0	0	100	0	99.897	2
GCA_000530865.1	M0352	98.463	0	0	0	0	0	0	0	0	0	0	0	0	97.656	0	0	100	0	99.897	1
GCA_000555065.1	M0353	99.95	0	0	0	0	0	0	0	0	0	0	0	0	97.656	0	0	100	0	99.897	1
GCA_000361125.1	M0424	98.463	99.869	0	0	0	0	99.048	0	0	0	0	0	0	97.656	0	0	100	0	99.897	3
GCA_000556245.1	M0453	98.463	99.869	0	0	0	0	0	0	0	0	0	0	0	97.656	0	0	100	0	99.897	2
GCA_000556265.1	M0454	99.95	99.869	0	0	0	0	0	0	0	0	0	0	0	97.656	0	0	100	0	99.897	2
GCA_000556285.1	M0457	99.95	99.869	0	0	0	0	0	0	0	0	0	0	0	97.656	0	0	100	0	99.897	2
GCA_000361265.1	M0468	98.463	99.869	0	0	0	0	0	0	0	0	0	0	0	97.656	0	0	100	0	99.831	2
GCA_000556425.1	M0469	99.95	99.869	0	0	0	0	0	0	0	0	0	0	0	97.656	0	0	100	0	99.831	2
GCA_000529515.1	M0511	98.463	99.869	0	0	0	0	0	0	0	0	0	0	0	97.656	0	0	100	0	99.897	2
GCA_000529575.1	M0524	98.463	99.869	0	0	0	0	0	0	0	0	0	0	0	97.656	0	0	100	0	99.897	2
GCA_000557045.1	M0527	98.463	0	0	0	0	0	0	0	0	0	0	0	0	97.656	0	0	100	0	99.897	1
GCA_000557205.1	M0542	99.95	99.869	0	0	0	0	0	0	0	0	0	0	0	97.656	0	0	100	0	99.897	2
GCA_000557505.1	M0563	99.95	99.869	0	0	0	0	0	0	0	0	0	0	0	97.656	0	0	100	0	99.897	2
GCA_000557525.1	M0564	99.95	99.869	0	0	0	0	0	0	0	0	0	0	0	97.656	0	0	100	0	99.897	2
GCA_000557565.1	M0567	99.95	99.869	0	0	0	0	0	0	0	0	0	0	0	97.656	0	0	100	0	99.897	2
GCA_000557665.1	M0577	99.95	99.869	0	0	0	0	0	0	0	0	0	0	0	97.656	0	0	100	0	99.897	2
GCA_000557905.1	M0593	99.95	99.869	0	0	0	0	0	0	0	0	0	0	0	97.656	0	0	100	0	99.897	2
GCA_000558185.1	M0615	99.95	99.869	0	0	0	0	99.048	0	0	0	0	0	0	97.656	0	0	100	0	99.897	3
GCA_000527735.1	M0630	99.95	99.869	0	0	0	0	0	0	0	0	0	0	0	97.656	0	0	100	0	99.897	2
GCA_000361705.1	M0633	98.463	99.869	0	0	0	0	99.048	0	0	0	0	0	0	97.656	0	0	100	0	99.897	3
GCA_000527835.1	M0636	98.463	99.869	0	0	0	0	0	0	0	0	0	0	0	97.656	0	0	100	0	99.897	2
GCA_000527935.1	M0645	99.95	99.869	0	0	0	0	0	0	0	0	0	0	0	97.656	0	0	100	0	99.897	2
GCA_000528095.1	M0658	99.95	99.869	0	0	0	0	0	0	0	0	0	0	0	97.656	0	0	100	0	99.897	2
GCA_000528175.1	M0668	99.95	99.869	0	0	0	0	0	0	0	0	0	0	0	97.656	0	0	100	0	99.897	2
GCA_000528235.1	M0671	98.463	99.869	0	0	0	0	0	0	0	0	0	0	0	97.656	0	0	100	0	99.897	2
GCA_000528735.1	M0709	98.463	99.869	0	0	0	0	0	0	0	0	0	0	0	97.656	0	0	100	0	99.897	2
GCA_000528955.1	M0729	98.463	99.869	0	0	0	0	0	0	0	0	0	0	0	97.656	0	0	100	0	99.897	2
GCA_000528975.1	M0730	98.463	99.869	0	0	0	0	0	0	0	0	0	0	0	97.656	0	0	100	0	99.897	2
GCA_000547705.1	M0758	97.872	100	0	0	0	0	100	0	0	0	0	0	0	0	0	0	0	0	0	2
GCA_000547745.1	M0760	99.95	99.869	0	0	0	0	0	0	0	0	0	0	0	97.656	0	0	100	0	99.897	2
GCA_000547845.1	M0766	98.463	99.869	0	0	0	0	0	0	0	0	0	0	0	97.656	0	0	100	0	99.897	2
GCA_000547885.1	M0768	99.95	100	0	0	0	0	100	0	0	0	0	0	0	0	0	0	0	0	0	2
GCA_000547905.1	M0771	99.95	99.869	0	0	0	0	0	0	0	0	0	0	0	97.656	0	0	100	0	99.897	2
GCA_000543485.1	M0773	99.95	100	0	0	0	0	100	0	0	0	0	0	0	0	0	0	0	0	0	2
GCA_000543845.1	M0800	99.95	99.869	0	0	0	0	0	0	0	0	0	0	0	97.656	0	0	100	0	99.897	2
GCA_000543865.1	M0801	98.463	99.869	0	0	0	0	0	0	0	0	0	0	0	97.656	0	0	100	0	99.897	2
GCA_000362065.1	M0831	98.463	99.869	0	0	0	0	0	0	0	0	0	0	0	97.656	0	0	100	0	99.897	2
GCA_000544245.1	M0833	98.463	99.869	0	0	0	0	0	0	0	0	0	0	0	97.656	0	0	100	0	99.897	2
GCA_000544525.1	M0853	98.463	99.869	0	0	0	0	0	0	0	0	0	0	0	97.656	0	0	100	0	99.897	2
GCA_000544565.1	M0858	98.463	99.869	0	0	0	0	0	0	0	0	0	0	0	97.656	0	0	100	0	99.897	2
GCA_000544965.1	M0893	99.95	99.869	0	0	0	0	0	0	0	0	0	0	0	97.656	0	0	100	0	99.904	2
GCA_000544985.1	M0894	99.95	99.869	0	0	0	0	0	0	0	0	0	0	0	97.656	0	0	100	0	99.904	2
GCA_000545205.1	M0910	98.463	99.869	0	0	0	0	0	0	0	0	0	0	0	97.656	0	0	100	0	99.897	2
GCA_000367745.1	M1	97.991	100	0	0	0	0	99.863	0	0	0	0	0	0	0	0	0	0	0	0	2
GCA_000362425.1	M1007	98.463	99.869	0	0	0	0	0	0	0	0	0	0	0	97.656	0	0	100	0	99.897	2
GCA_000546425.1	M1017	98.463	99.869	0	0	0	0	0	0	0	0	0	0	0	97.656	0	0	100	0	99.897	2
GCA_000546845.1	M1056	99.95	99.869	0	0	0	0	0	0	0	0	0	0	0	97.656	0	0	100	0	99.897	2
GCA_000362645.1	M1064	98.463	99.869	0	0	0	0	99.048	0	0	0	0	0	0	97.656	0	0	100	0	99.897	3
GCA_000547245.1	M1094	98.463	99.869	0	0	0	0	0	0	0	0	0	0	0	97.656	0	0	100	0	99.831	2
GCA_000547285.1	M1101	99.95	99.869	0	0	0	0	0	0	0	0	0	0	0	97.656	0	0	100	0	99.897	2
GCA_000575825.1	M1124	99.95	99.869	0	0	0	0	0	0	0	0	0	0	0	97.656	0	0	100	0	99.897	2
GCA_000575725.1	M1132	99.95	99.869	0	0	0	0	0	0	0	0	0	0	0	97.656	0	0	100	0	99.897	2
GCA_000575445.1	M1153	99.95	99.869	0	0	0	0	0	0	0	0	0	0	0	97.656	0	0	100	0	99.897	2
GCA_000532835.1	M1183	98.463	99.869	0	0	0	0	0	0	0	0	0	0	0	97.656	0	0	100	0	99.904	2
GCA_000363025.1	M1223	98.463	99.869	0	0	0	0	0	0	0	0	0	0	0	97.656	0	0	100	0	99.897	2
GCA_000574165.1	M1262	98.463	99.869	0	0	0	0	0	0	0	0	0	0	0	97.656	0	0	100	0	99.904	2
GCA_000574145.1	M1263	98.463	99.869	0	0	0	0	0	0	0	0	0	0	0	97.656	0	0	100	0	99.897	2
GCA_000574045.1	M1270	98.463	99.869	0	0	0	0	0	0	0	0	0	0	0	97.656	0	0	100	0	99.897	2
GCA_000532955.1	M1294	98.463	99.869	0	0	0	0	0	0	0	0	0	0	0	97.656	0	0	100	0	99.904	2
GCA_000573625.1	M1297	98.463	99.869	0	0	0	0	0	0	0	0	0	0	0	97.656	0	0	100	0	99.897	2
GCA_000573525.1	M1304	99.95	99.869	0	0	0	0	99.048	0	0	0	0	0	0	97.656	0	0	100	0	99.89	3
GCA_000573325.1	M1319	98.463	99.869	0	0	0	0	0	0	0	0	0	0	0	97.656	0	0	100	0	99.897	2
GCA_000533035.1	M1346	98.463	99.869	0	0	0	0	0	0	0	0	0	0	0	97.656	0	0	100	0	99.904	2
GCA_000549545.1	M1348	99.95	99.869	0	0	0	0	0	0	0	0	0	0	0	97.656	0	0	100	0	99.897	2
GCA_000549605.1	M1351	99.95	99.869	0	0	0	0	99.048	0	0	0	0	0	0	97.656	0	0	100	0	99.89	3
GCA_000532435.1	M1375	98.463	99.869	0	0	0	0	0	0	0	0	0	0	0	97.656	0	0	100	0	99.89	2
GCA_000548305.1	M1400	99.95	100	0	0	0	0	99.048	0	0	0	0	0	0	97.656	0	0	100	0	99.89	3
GCA_000548405.1	M1408	99.95	99.869	0	0	0	0	99.048	0	0	0	0	0	0	97.656	0	0	100	0	99.89	3
GCA_000532555.1	M1427	98.463	99.869	0	0	0	0	0	0	0	0	0	0	0	97.656	0	0	100	0	99.89	2
GCA_000548885.1	M1436	99.95	99.869	0	0	0	0	0	0	0	0	0	0	0	97.656	0	0	100	0	99.89	2
GCA_000549045.1	M1447	99.95	99.869	0	0	0	0	99.048	0	0	0	0	0	0	97.656	0	0	100	0	99.89	3
GCA_000549125.1	M1453	99.95	99.869	0	0	0	0	99.048	0	0	0	0	0	0	97.656	0	0	100	0	0	3
GCA_000363545.1	M1462	98.463	99.869	0	0	0	0	99.048	0	0	0	0	0	0	97.656	0	0	100	0	99.89	3
GCA_000587335.1	M42184	98.109	99.874	0	0	0	0	98.978	0	0	0	0	0	0	97.656	0	0	99.8	0	99.897	3
GCA_000579635.1	M49501	99.882	99.874	0	0	0	0	98.978	0	0	0	0	0	0	0	0	0	0	0	0	2
GCA_000587235.1	M79254	99.882	99.874	0	0	0	0	98.978	0	0	0	0	0	0	0	0	0	0	0	0	2
GCA_000587215.1	M79256	99.882	99.874	0	0	0	0	98.978	0	0	0	0	0	0	0	0	0	0	0	0	2
GCA_000587115.1	M90388	98.109	99.874	0	0	0	0	98.978	0	0	0	0	0	0	97.656	0	0	99.8	0	99.897	3
GCA_000538435.1	OCMM6037	99.882	99.874	0	0	0	0	98.978	0	0	0	0	0	0	0	0	0	0	0	0	2
GCA_000538935.1	OCMM6048	98.463	0	0	0	0	0	0	0	0	0	0	0	0	0	100	0	0	0	0	1
GCA_000540655.1	OCMM6057	98.463	0	0	0	0	0	99.048	0	0	0	0	0	0	0	100	0	0	0	0	2
GCA_000572425.1	OCMM6115	99.882	0	0	0	0	0	0	0	0	0	0	0	0	0	0	0	0	0	0	0
GCA_000542675.1	OCMM6124	99.95	0	0	0	0	0	0	0	0	0	0	0	0	0	100	0	0	0	0	1
GCA_000583615.1	SA0077	98.227	99.93	0	0	0	0	99.048	0	0	100	0	0	0	0	0	0	0	0	0	3
GCA_000537695.1	SCOA6012	99.95	99.874	0	0	0	0	98.978	0	0	0	0	0	0	0	0	0	0	0	0	2
GCA_000540775.1	SCOA6048	99.95	99.874	0	0	0	0	99.099	0	0	0	0	0	0	0	0	0	0	0	0	2
GCA_000537755.1	SJUD6056	99.882	99.874	0	0	0	0	98.978	0	0	0	0	0	0	0	0	0	0	0	0	2
GCA_000537135.1	SMMC6087	99.764	99.874	0	0	0	0	98.978	0	0	0	0	0	0	0	0	0	0	0	0	2
GCA_000560905.1	W42929	99.95	0	0	0	0	0	0	0	0	0	0	0	0	0	0	0	0	0	0	0
GCA_000606045.1	W52294	99.882	99.874	0	0	0	0	98.978	0	0	0	0	0	0	0	0	0	0	0	0	2
GCA_000570455.1	W75119	95.508	0	0	0	0	0	0	0	0	0	0	0	0	0	0	0	0	0	0	0
GCA_000594125.1	W92100	99.882	99.874	0	0	0	0	98.978	0	0	0	0	0	0	0	0	0	0	0	0	2
GCA_000538495.1	WAMC6013	99.882	0	0	0	0	0	0	0	0	0	0	0	0	0	0	0	0	0	0	0
GCA_000542885.1	WAMC6060	99.882	99.874	0	0	0	0	98.978	0	0	0	0	0	0	0	0	0	0	0	0	2
GCA_000572405.1	WMCS6114	99.882	99.874	0	0	0	0	98.978	0	0	0	0	0	0	0	0	0	0	0	0	2
GCA_000647695.1	SA0518	98.227	0	0	0	0	0	0	0	0	0	0	0	0	0	0	0	0	0	0	0
GCA_000647715.1	SA0521	98.227	0	0	0	0	0	0	0	0	100	0	0	0	0	0	0	0	0	0	1
GCA_000647735.1	SA0519	99.95	0	0	0	0	0	0	0	0	0	0	0	0	0	0	0	0	0	0	0
GCA_000647755.1	SA0520	99.9	0	0	0	0	0	0	0	0	0	0	0	0	0	0	0	0	0	0	0
GCA_000626615.3	FDAARGOS_5	0	0	0	0	0	0	0	0	0	0	0	0	0	0	0	0	0	0	0	0
GCA_002786465.1	EDCC5458	0	0	0	0	0	0	0	0	0	0	0	0	0	0	0	0	0	0	0	0
GCA_001448095.1	MRSA_S14	97.991	0	0	0	0	0	0	0	0	0	0	0	0	0	0	0	0	0	0	0
GCA_001448105.1	MRSA_S11	97.991	0	0	0	0	0	0	0	0	0	0	0	0	0	0	0	0	0	0	0
GCA_001448135.1	MRSA_S17	97.991	0	0	0	0	0	0	0	0	0	0	0	0	0	0	0	0	0	0	0
GCA_001448215.1	MRSA_S7	97.991	0	0	0	0	0	0	0	0	0	0	0	0	0	0	0	0	0	0	0
GCA_001448235.1	MRSA_S9	97.991	0	0	0	0	0	0	0	0	0	0	0	0	0	0	0	0	0	0	0
GCA_001448305.1	MRSA_S24	97.991	0	0	0	0	0	0	0	0	0	0	0	0	0	0	0	0	0	0	0
GCA_001448325.1	MRSA_S13	97.991	0	0	0	0	0	0	0	0	0	0	0	0	0	0	0	0	0	0	0
GCA_001457115.1	MRSA_S1	97.991	0	0	0	0	0	0	0	0	0	0	0	0	0	0	0	0	0	0	0
GCA_001457125.1	MRSA_S15	97.991	0	0	0	0	0	0	0	0	0	0	0	0	99.928	0	0	0	0	0	1
GCA_001457175.1	MRSA_S19	97.991	0	0	0	0	0	0	0	0	0	0	0	0	99.928	0	0	0	0	0	1
GCA_001457195.1	MRSA_S26	97.991	0	0	0	0	0	0	0	0	0	0	0	0	0	0	0	0	0	0	0
GCA_000174955.1	132	99.95	99.869	0	0	0	0	0	0	0	0	0	0	0	0	0	0	0	0	0	1
GCA_000239675.2	21209	99.95	99.869	0	0	0	0	0	0	0	0	0	0	0	97.656	0	0	100	0	0	2
GCA_000248495.2	CIG1114	98.463	100	0	0	0	0	99.048	0	0	0	0	0	0	97.656	0	0	100	0	99.904	3
GCA_000248795.2	CIG1612	98.463	100	0	0	0	0	99.048	0	0	0	0	0	0	97.656	0	0	100	0	99.904	3
GCA_000248815.2	CIG1770	97.991	0	0	0	0	0	0	0	0	0	0	0	0	97.604	0	0	100	0	99.897	1
GCA_000248835.2	CIG2018	98.463	99.869	0	0	0	0	0	0	0	0	0	0	0	97.656	0	0	100	0	99.904	2
GCA_000248675.2	CIG547	98.463	99.869	0	0	0	0	100	0	0	0	0	0	0	0	0	0	0	0	0	2
GCA_000012045.1	COL	99.9	0	0	0	0	0	0	0	0	0	0	0	0	100	0	0	0	0	0	1
GCA_000187165.1	MRSA177	97.991	0	0	0	0	0	0	0	0	0	0	0	0	99.928	0	0	0	0	0	1

## Sheet: CC45
Assembly	Strain	beta-lactam	aminoglycoside	colistin	fosfomycin	fusidicacid	glycopeptide	macrolide	nitroimidazole	oxazolidinone	phenicol	quinolone	rifampicin	sulphonamide	tetracycline	trimethoprim	ardA-H2	ardA-H1	Tn916	Tn5801	Resistance without bl
GCA_000412775.1	CA-347	99.764	99.869	0	0	0	0	100	0	0	0	0	0	0	0	0	0	0	0	0	2
GCA_001594205.1	MCRF184	0	0	0	0	0	0	0	0	0	0	0	0	0	0	0	0	0	0	0	0
GCA_002633765.1	CFSAN007835	0	0	0	0	0	0	0	0	0	0	0	0	0	0	0	0	0	0	0	0
GCA_003073635.1	AR466	99.764	0	0	0	100	0	0	0	0	0	0	0	0	0	0	0	0	0	0	1
GCA_003073755.1	AR464	99.409	0	0	0	0	0	0	0	0	0	0	0	0	0	0	0	0	0	0	0
GCA_003193765.1	AR_0471	99.409	0	0	0	0	0	0	0	0	0	0	0	0	0	0	0	0	0	0	0
GCA_900323925.1	1549-WT	0	0	0	0	0	0	0	0	0	0	0	0	0	0	0	0	0	0	0	0
GCA_900323955.1	1549-REV	0	0	0	0	0	0	0	0	0	0	0	0	0	0	0	0	0	0	0	0
GCA_900323965.1	1549-SCV	0	0	0	0	0	0	0	0	0	0	0	0	0	0	0	0	0	0	0	0
GCA_900474565.1	NCTC8726	0	0	0	0	0	0	0	0	0	0	0	0	0	0	0	0	0	0	0	0
GCA_000362125.1	M0877	99.882	0	0	0	0	0	99.048	0	0	0	0	0	0	0	0	0	0	0	0	1
GCA_000363305.1	M1311	99.764	100	0	0	0	0	100	0	0	0	0	0	0	0	0	0	0	0	0	2
GCA_000528435.1	M0684	0	100	0	0	0	0	100	0	0	0	0	0	0	0	0	0	0	0	0	2
GCA_000528515.1	M0690	99.95	100	0	0	0	0	100	0	0	0	0	0	0	0	0	0	0	0	0	2
GCA_000528795.1	M0715	100	100	0	0	0	0	100	0	0	0	0	0	0	0	0	0	0	0	0	2
GCA_000531875.1	M0745	99.656	100	0	0	0	0	100	0	0	0	0	0	0	0	0	0	0	0	0	2
GCA_000532095.1	M0896	99.95	100	0	0	0	0	100	0	0	0	0	0	0	0	0	0	0	0	0	2
GCA_000543425.1	M0750	99.867	100	0	0	0	0	100	0	0	0	0	0	0	0	0	0	0	0	0	2
GCA_000543545.1	M0777	99.764	100	0	0	0	0	100	0	0	0	0	0	0	0	0	0	0	0	0	2
GCA_000543725.1	M0790	99.655	100	0	0	0	0	100	0	0	0	0	0	0	0	0	0	0	0	0	2
GCA_000544145.1	M0820	99.831	100	0	0	0	0	100	0	0	0	0	0	0	0	0	0	0	0	0	2
GCA_000544165.1	M0821	0	100	0	0	0	0	100	0	0	0	0	0	0	0	0	0	0	0	0	2
GCA_000544665.1	M0866	99.764	100	0	0	0	0	100	0	0	0	0	0	0	0	0	0	0	0	0	2
GCA_000545285.1	M0916	99.95	100	0	0	0	0	100	0	0	0	0	0	0	0	0	0	0	0	0	2
GCA_000545565.1	M0937	99.95	100	0	0	0	0	100	0	0	0	0	0	0	0	0	0	0	0	0	2
GCA_000547765.1	M0761	99.95	100	0	0	0	0	100	0	0	0	0	0	0	0	0	0	0	0	0	2
GCA_000554625.1	M0318	0	0	0	0	0	0	0	0	0	0	0	0	0	0	0	0	0	0	0	0
GCA_000558485.1	M0236	97.991	0	0	0	0	0	0	0	0	0	0	0	0	0	0	0	0	0	0	0
GCA_000562695.1	W56227	98.463	0	0	0	0	0	0	0	0	0	0	0	0	100	0	0	0	0	0	1
GCA_000562715.1	W56243	98.463	0	0	0	0	0	0	0	0	0	0	0	0	100	0	0	0	0	0	1
GCA_000562735.1	W56246	98.463	0	0	0	0	0	0	0	0	0	0	0	0	100	0	0	0	0	0	1
GCA_000573705.1	M1292	99.95	100	0	0	0	0	100	0	0	0	0	0	0	0	0	0	0	0	0	2
GCA_000573885.1	M1278	99.95	100	0	0	0	0	100	0	0	0	0	0	0	0	0	0	0	0	0	2
GCA_000574005.1	M1272	100	100	0	0	0	0	100	0	0	0	0	0	0	0	0	0	0	0	0	2
GCA_000574205.1	M1260	99.867	100	0	0	0	0	100	0	0	0	0	0	0	0	0	0	0	0	0	2
GCA_000574485.1	M1237	99.764	100	0	0	0	0	100	0	0	0	0	0	0	0	0	0	0	0	0	2
GCA_000574665.1	M1225	99.655	100	0	0	0	0	100	0	0	0	0	0	0	0	0	0	0	0	0	2
GCA_000574825.1	M1213	99.95	100	0	0	0	0	100	0	0	0	0	0	0	0	0	0	0	0	0	2
GCA_000574865.1	M1208	100	100	0	0	0	0	100	0	0	0	0	0	0	0	0	0	0	0	0	2
GCA_000575245.1	M1169	99.01	0	0	0	0	0	0	0	0	0	0	0	0	0	0	0	0	0	0	0
GCA_000575485.1	M1151	99.95	100	0	0	0	0	100	0	0	0	0	0	0	0	0	0	0	0	0	2
GCA_000586735.1	W85810	98.463	0	0	0	0	0	99.065	0	0	0	0	0	0	100	0	0	0	0	0	2
GCA_000586755.1	W85807	98.463	0	0	0	0	0	99.228	0	0	0	0	0	0	100	0	0	0	0	0	2
GCA_000586795.1	W42304	98.463	0	0	0	0	0	99.048	0	0	0	0	0	0	100	0	0	0	0	0	2
GCA_000604645.1	F29450_091412	97.561	0	0	0	0	0	0	0	0	0	0	0	0	100	0	0	0	0	0	1
GCA_000605985.1	W42298_110712	98.463	0	0	0	0	0	99.048	0	0	0	0	0	0	100	0	0	0	0	0	2
GCA_000735755.1	SK1585	98.463	99.67	0	0	0	0	99.863	0	0	100	0	0	0	97.656	0	0	100	93.367	99.975	4
GCA_001971545.1	M1057	99.409	0	0	0	0	0	0	0	0	0	0	0	0	0	0	0	0	0	0	0
GCA_003055675.1	N2	99.409	0	0	0	0	0	99.245	0	0	0	0	0	0	0	0	0	0	0	0	1
GCA_003055715.1	N2a	99.409	0	0	0	0	0	98.978	0	0	0	0	0	0	0	0	0	0	0	0	1
GCA_000174575.1	A9635	99.882	0	0	0	0	0	0	0	0	0	0	0	0	0	0	0	0	0	0	0
GCA_000221825.2	21200	97.991	0	0	0	0	0	0	0	0	0	0	0	0	0	0	0	0	0	0	0
GCA_000239535.2	21194	98.345	0	0	0	0	0	0	0	0	0	0	0	0	0	0	0	0	0	0	0
GCA_000242475.2	21252	0	99.78	0	0	0	0	98.912	0	0	100	0	0	0	100	0	100	0	99.922	93.369	4
GCA_000248855.2	CIG290	95.626	0	0	0	0	0	0	0	0	0	0	0	0	0	0	0	0	0	0	0
GCA_000248915.2	CIG1524	99.764	0	0	0	0	0	0	0	0	0	0	0	0	0	0	0	0	0	0	0
GCA_000534835.1	301-188	95.981	0	0	0	0	0	0	0	0	0	0	0	0	0	0	0	0	0	0	0
GCA_000534855.1	300-169	95.981	0	0	0	0	0	98.912	0	0	0	0	0	0	0	0	0	0	0	0	1
GCA_000601505.1	F12926_081012	98.463	0	0	0	0	0	0	0	0	0	0	0	0	100	0	0	0	0	0	1
GCA_000602165.1	W85806_020613	97.561	0	0	0	0	0	0	0	0	0	0	0	0	100	0	0	0	0	0	1
GCA_000627015.1	21314	99.409	0	0	0	0	0	0	0	0	0	0	0	0	0	0	0	0	0	0	0
GCA_000705455.1	SA8-LAU	98.345	0	0	0	0	0	0	0	0	0	0	0	0	0	0	0	0	0	0	0
GCA_000824985.1	SAU060112	0	0	0	0	0	0	0	0	0	0	0	0	0	0	0	0	0	0	0	0
GCA_000877855.1	A900624	99.409	0	0	0	0	0	0	0	0	0	0	0	0	0	0	0	0	0	0	0
GCA_000982855.1	APS210	98.463	0	0	0	0	0	99.184	0	0	0	0	0	0	100	0	0	0	0	0	2
GCA_000982925.1	APS211	98.463	0	0	0	0	0	99.465	0	0	0	0	0	0	100	0	0	0	0	0	2
GCA_001018965.2	FDAARGOS_29	99.95	100	0	0	0	0	100	0	0	0	0	0	0	0	0	0	0	0	0	2
GCA_001049575.1	AH1	98.463	82.67	0	0	0	0	99.048	0	0	0	0	0	0	99.928	0	0	0	0	0	2
GCA_001297605.1	BU_W12_t13	95.508	0	0	0	0	0	0	0	0	0	0	0	0	0	0	0	0	0	0	0
GCA_001566905.1	HUK16	99.409	0	0	0	0	0	0	0	0	0	0	0	0	0	0	0	0	0	0	0
GCA_001743105.1	IF6SW-P2	97.991	0	0	0	0	0	0	0	0	0	0	0	0	0	0	0	0	0	0	0
GCA_001743125.1	IF6SW-P2-RA	97.991	0	0	0	0	0	0	0	0	0	0	0	0	0	0	0	0	0	0	0
GCA_001743135.1	IF6SW-P3A-RA	97.859	0	0	0	0	0	0	0	0	0	0	0	0	0	0	0	0	0	0	0
GCA_001743215.1	IIF8SW-P1	97.991	0	0	0	0	0	0	0	0	0	0	0	0	0	0	0	0	0	0	0
GCA_001743235.1	IIF6SW-P3	97.991	0	0	0	0	0	0	0	0	0	0	0	0	0	0	0	0	0	0	0
GCA_001743265.1	IIF6SW-P2-RA	97.991	0	0	0	0	0	0	0	0	0	0	0	0	0	0	0	0	0	0	0
GCA_001743275.1	IIF6SW-P3-RA	97.991	0	0	0	0	0	0	0	0	0	0	0	0	0	0	0	0	0	0	0
GCA_001743285.1	IIF8SW-P2	97.991	0	0	0	0	0	0	0	0	0	0	0	0	0	0	0	0	0	0	0
GCA_001743305.1	IIF8SW-P1-RA	97.991	0	0	0	0	0	0	0	0	0	0	0	0	0	0	0	0	0	0	0
GCA_001743495.1	IIF6SW-P2	97.991	0	0	0	0	0	99.539	0	0	0	0	0	0	0	0	0	0	0	0	1
GCA_001899935.1	SA_123	99.409	0	0	0	0	0	0	0	0	0	0	0	0	0	0	0	0	0	0	0
GCA_001899965.1	SA_520	99.409	0	0	0	0	0	0	0	0	0	0	0	0	0	0	0	0	0	0	0
GCA_001900095.1	SA_170015	99.95	100	0	0	0	0	99.863	0	0	0	0	0	0	0	0	0	0	0	0	2
GCA_002221815.1	ABFQT	99.882	0	0	0	0	0	0	0	0	0	0	0	0	0	0	0	0	0	0	0
GCA_002905675.1	HCW21A_160215	99.693	0	0	0	0	0	0	0	0	0	0	0	0	0	0	0	0	0	0	0
GCA_003017425.1	0200668-1	99.882	0	0	0	0	0	0	0	0	0	0	0	0	0	0	0	0	0	0	0
GCA_003017715.1	15076009-1	97.991	0	0	0	0	0	0	0	0	0	0	0	0	0	0	0	0	0	0	0
GCA_003236755.1	CM179	95.863	0	0	0	0	0	0	0	0	0	0	0	0	0	0	0	0	0	0	0
GCA_003237035.1	CM158	95.863	0	0	0	0	0	0	0	0	0	0	0	0	0	0	0	0	0	0	0
GCA_003237935.1	CM159	95.863	0	0	0	0	0	0	0	0	0	0	0	0	0	0	0	0	0	0	0
GCA_003238035.1	CM139	95.863	0	0	99.048	0	0	0	0	0	0	0	0	0	0	0	0	0	0	0	1
GCA_003238415.1	CM72	99.409	0	0	0	0	0	0	0	0	0	0	0	0	0	0	0	0	0	0	0
GCA_003239025.1	CM6	0	0	0	0	0	0	0	0	0	0	0	0	0	0	0	0	0	0	0	0
GCA_003239095.1	CM1	95.863	0	0	0	0	0	0	0	0	0	0	0	0	0	0	0	0	0	0	0
GCA_003239155.1	CM177	0	0	0	0	0	0	0	0	0	0	0	0	0	0	0	0	0	0	0	0
GCA_003239185.1	CM152	95.863	0	0	0	0	0	0	0	0	0	0	0	0	0	0	0	0	0	0	0
GCA_003239625.1	CM54	99.409	0	0	0	0	0	0	0	0	0	0	0	0	0	0	0	0	0	0	0
GCA_003417225.1	M1C026	97.991	0	0	0	0	0	0	0	0	0	0	0	0	0	0	0	0	0	0	0
GCA_003417265.1	M1C028	0	0	0	0	0	0	0	0	0	0	0	0	0	0	0	0	0	0	0	0
GCA_003419025.1	M1K032	0	0	0	0	0	0	0	0	0	0	0	0	0	0	0	0	0	0	0	0
GCA_003419645.1	M1K121	0	0	0	0	0	0	0	0	0	0	0	0	0	0	0	0	0	0	0	0
GCA_003420845.1	M6C041	98.227	0	0	0	0	0	0	0	0	0	0	0	0	0	0	0	0	0	0	0
GCA_003420885.1	M6C043	98.227	0	0	0	0	0	0	0	0	0	0	0	0	0	0	0	0	0	0	0
GCA_003422325.1	M6K127	98.227	0	0	0	0	0	0	0	0	0	0	0	0	0	0	0	0	0	0	0
GCA_003422805.1	M6K185	0	0	0	0	0	0	0	0	0	0	0	0	0	0	0	0	0	0	0	0
GCA_003423685.1	M1KS0073_1	95.745	0	0	0	0	0	0	0	0	0	0	0	0	0	0	0	0	0	0	0
GCA_003423705.1	M1KS0073_2	95.745	0	0	0	0	0	0	0	0	0	0	0	0	0	0	0	0	0	0	0
GCA_003720175.1	CFBR-509	95.863	0	0	0	0	0	0	0	0	0	0	0	0	0	0	0	0	0	0	0
GCA_003813285.1	G0489	99.409	0	0	0	0	0	0	0	0	0	0	0	0	0	0	0	0	0	0	0
GCA_004403005.1	CDC 368-04	98.463	0	0	0	0	0	0	0	0	0	0	0	0	99.855	0	0	0	0	0	1
GCA_004403555.1	04-001	99.882	0	0	0	0	0	0	0	0	0	0	0	0	0	0	0	0	0	0	0
GCA_005280135.1	2597	95.863	0	0	0	0	0	99.048	0	0	0	0	0	0	0	0	0	0	0	0	1
GCA_900042155.1	st1358	98.463	0	0	0	100	0	99.048	0	0	0	0	0	0	0	0	0	0	0	0	2
GCA_900047195.1	st534	95.863	0	0	0	0	0	0	0	0	0	0	0	0	0	0	0	0	0	0	0
GCA_900048315.1	st2436	99.764	100	0	0	0	0	100	0	0	0	0	0	0	0	0	0	0	0	0	2
GCA_900051385.1	st3059	99.764	100	0	0	0	0	100	0	0	0	0	0	0	0	0	0	0	0	0	2
GCA_001064055.1	229_SAUR	99.882	100	0	0	0	0	99.863	0	0	0	0	0	0	0	0	0	0	0	0	2
GCA_001297555.1	BU_N22_t6	98.463	0	0	0	0	0	0	0	0	84.919	0	0	0	0	0	0	0	0	0	0
GCA_001743185.1	IF6SW-P3A	97.991	0	0	0	0	0	0	0	0	0	0	0	0	0	0	0	0	0	0	0
GCA_001743345.1	IIF8SW-P2-RA	97.991	0	0	0	0	0	99.449	0	0	0	0	0	0	0	0	0	0	0	0	1
GCA_001971525.1	H1670	96.351	0	0	0	0	0	0	0	0	0	0	0	0	0	0	0	0	0	0	0
GCA_002121845.1	CFSA252	99.291	0	0	0	0	0	0	0	0	0	0	0	0	0	0	0	0	0	0	0
GCA_002123565.1	CFSA161	99.882	100	0	0	0	0	99.863	0	0	0	0	0	0	0	0	0	0	0	0	2
GCA_002124325.1	CFSA086	99.291	0	0	0	0	0	0	0	0	0	0	0	0	0	0	0	0	0	0	0
GCA_002124555.1	CFSA203	99.645	0	0	0	0	0	0	0	0	0	0	0	0	0	0	0	0	0	0	0
GCA_002124565.1	CFSA201	95.863	0	0	0	0	0	0	0	0	0	0	0	0	0	0	0	0	0	0	0
GCA_002124865.1	CFSA152	99.882	0	0	0	0	0	0	0	0	0	0	0	0	0	0	0	0	0	0	0
GCA_002124985.1	CFSA113	99.882	100	0	0	0	0	99.863	0	0	0	0	0	0	0	0	0	0	0	0	2
GCA_002125465.1	CFSA045	99.291	0	0	0	0	0	0	0	0	0	0	0	0	0	0	0	0	0	0	0
GCA_002126165.1	c50	0	0	0	0	0	0	0	0	0	0	0	0	0	0	0	0	0	0	0	0
GCA_002126955.1	c53	95.863	0	0	0	0	0	0	0	0	0	0	0	0	0	0	0	0	0	0	0
GCA_002572935.1	356P	99.409	0	0	0	0	0	0	0	0	0	0	0	0	100	0	0	0	0	0	1
GCA_002905075.1	W46_140415	98.463	0	0	0	0	0	0	0	0	0	0	0	0	0	0	0	0	0	0	0
GCA_002905315.1	B28_120215	98.463	0	0	0	0	0	0	0	0	0	0	0	0	0	0	0	0	0	0	0
GCA_002905475.1	HCW21B_160215	99.409	0	0	0	0	0	0	0	0	0	0	0	0	0	0	0	0	0	0	0
GCA_002905495.1	B26A_160215	99.409	0	0	0	0	0	0	0	0	0	0	0	0	0	0	0	0	0	0	0
GCA_003417405.1	M1C041	98.227	0	0	0	0	0	0	0	0	0	0	0	0	0	0	0	0	0	0	0
GCA_003418135.1	M1C063	0	0	0	0	0	0	0	0	0	0	0	0	0	0	0	0	0	0	0	0
GCA_003419295.1	M1K046	0	0	0	0	0	0	0	0	0	0	0	0	0	0	0	0	0	0	0	0
GCA_003419355.1	M1K049	0	0	0	0	0	0	0	0	0	0	0	0	0	0	0	0	0	0	0	0
GCA_003420185.1	M1K176	0	0	0	0	0	0	0	0	0	0	0	0	0	0	0	0	0	0	0	0
GCA_003421085.1	M6C062	0	0	0	0	0	0	0	0	0	0	0	0	0	0	0	0	0	0	0	0
GCA_003421105.1	M6C063	0	0	0	0	0	0	0	0	0	0	0	0	0	0	0	0	0	0	0	0
GCA_003421825.1	M6K073	99.882	0	0	0	0	0	0	0	0	0	0	0	0	0	0	0	0	0	0	0
GCA_003422065.1	M6K102	0	0	0	0	0	0	0	0	0	0	0	0	0	0	0	0	0	0	0	0
GCA_003422485.1	M6K150	95.863	0	0	0	0	0	0	0	0	0	0	0	0	0	0	0	0	0	0	0
GCA_003422725.1	M6K176	0	0	0	0	0	0	0	0	0	0	0	0	0	0	0	0	0	0	0	0
GCA_003857225.1	C3528	99.409	0	0	0	0	0	0	0	0	0	0	0	0	0	0	0	0	0	0	0
GCA_003857265.1	C2768	99.409	0	0	0	0	0	0	0	0	0	0	0	0	0	0	0	0	0	0	0
GCA_003857345.1	C1512	95.863	0	0	0	0	0	0	0	0	0	0	0	0	0	0	0	0	0	0	0
GCA_003857355.1	C2778	99.409	0	0	0	0	0	0	0	0	0	0	0	0	0	0	0	0	0	0	0
GCA_900041895.1	st424	99.409	0	0	0	0	0	0	0	0	0	0	0	0	0	0	0	0	0	0	0
GCA_900045785.1	st436	99.95	0	0	0	0	0	0	0	0	0	0	0	0	0	0	0	0	0	0	0
GCA_900046465.1	LYO-S2	98.63	0	0	0	0	0	0	0	0	0	0	0	0	0	0	0	0	0	0	0
GCA_900097835.1	MSSA T188	99.409	0	0	0	0	0	0	0	0	0	0	0	0	0	0	0	0	0	0	0
GCA_900124935.1	3688STDY6125005	98.463	0	0	0	0	0	0	0	0	0	0	0	0	0	0	0	0	0	0	0
GCA_900125195.1	3688STDY6125032	98.463	0	0	0	0	0	0	0	0	0	0	0	0	0	0	0	0	0	0	0
GCA_900250155.1	H1300	99.409	0	0	0	0	0	0	0	0	0	0	0	0	0	0	0	0	0	0	0
GCA_900250255.1	H1308	99.409	0	0	0	0	0	0	0	0	0	0	0	0	0	0	0	0	0	0	0
GCA_900250465.1	H1528	99.409	0	0	0	0	0	0	0	0	0	0	0	0	0	0	0	0	0	0	0
GCA_900250515.1	H1480	95.745	0	0	0	0	0	0	0	0	0	0	0	0	0	0	0	0	0	0	0
GCA_900250675.1	H1730	95.863	0	0	0	0	0	0	0	0	0	0	0	0	0	0	0	0	0	0	0
GCA_900250765.1	H1800	99.409	0	0	0	0	0	0	0	0	0	0	0	0	0	0	0	0	0	0	0
GCA_900250855.1	M2867	99.246	0	0	0	0	0	0	0	0	0	0	0	0	0	0	0	0	0	0	0
GCA_900250885.1	HL463	99.409	0	0	0	0	0	0	0	0	0	0	0	0	0	0	0	0	0	0	0
GCA_900251045.1	M3016	98.345	0	0	0	0	0	0	0	0	0	0	0	0	0	0	0	0	0	0	0
GCA_900251075.1	M3095	99.409	0	0	0	0	0	0	0	0	0	0	0	0	0	0	0	0	0	0	0
GCA_900251085.1	M3107	99.409	0	0	0	0	0	0	0	0	0	0	0	0	0	0	0	0	0	0	0
GCA_900251115.1	M3063	99.409	0	0	0	0	0	99.048	0	0	0	0	0	0	0	0	0	0	0	0	1
GCA_900251325.1	M3331	99.409	0	0	0	0	0	0	0	0	0	0	0	0	0	0	0	0	0	0	0
GCA_900251345.1	M3307	99.387	0	0	0	0	0	0	0	0	0	0	0	0	0	0	0	0	0	0	0
GCA_001282075.1	Alex451	97.952	0	0	0	0	0	0	0	0	0	0	0	0	0	0	0	0	0	0	0

## Sheet: CC22
Assembly	Strain	beta-lactam	aminoglycoside	colistin	fosfomycin	fusidicacid	glycopeptide	macrolide	nitroimidazole	oxazolidinone	phenicol	quinolone	rifampicin	sulphonamide	tetracycline	trimethoprim	ardA-H2	ardA-H1	Tn916	Tn5801	Resistance without bl
GCA_000284535.1	HO 5096 0412	95.745	0	0	0	0	0	0	0	0	0	0	0	0	0	0	0	0	0	0	0
GCA_000695215.1	H-EMRSA-15	95.745	0	0	0	0	0	0	0	0	0	0	0	0	0	0	0	0	0	0	0
GCA_001018835.2	NRS271	95.745	0	0	0	0	0	0	0	0	0	0	0	0	0	0	0	0	0	0	0
GCA_002786535.1	EDCC5464	95.745	0	0	0	0	0	0	0	0	0	0	0	0	0	0	0	0	0	0	0
GCA_003184985.1	IT1-S	0	0	0	0	0	0	0	0	0	0	0	0	0	0	0	0	0	0	0	0
GCA_003185005.1	IT4-R	0	0	0	0	0	0	0	0	0	0	0	0	0	0	0	0	0	0	0	0
GCA_004153365.1	VB31683	95.863	100	0	0	0	0	99.048	0	0	0	0	0	0	0	0	0	0	0	0	2
GCA_005706855.1	Lr2	99.95	99.93	0	0	0	0	99.048	0	0	0	0	0	0	0	0	0	0	0	0	2
GCA_900620235.1	BPH2900	95.745	0	0	0	0	0	99.048	0	0	0	0	0	0	0	0	0	0	0	0	1
GCA_900635245.1	NCTC13142	95.745	0	0	0	0	0	0	0	0	0	0	0	0	0	0	0	0	0	0	0
GCA_900635905.1	NCTC13616	95.745	0	0	0	0	0	0	0	0	0	0	0	0	0	0	0	0	0	0	0
GCA_000364105.1	M1228	95.745	0	0	0	0	0	0	0	0	0	0	0	0	0	0	0	0	0	0	0
GCA_000564735.1	W85432	95.863	99.869	0	0	0	0	0	0	0	0	0	0	0	0	0	0	0	0	0	1
GCA_000569275.1	W33563	95.745	0	0	0	0	0	99.048	0	0	0	0	0	0	0	0	0	0	0	0	1
GCA_000574405.1	M1242	95.745	0	0	0	0	0	0	0	0	0	0	0	0	0	0	0	0	0	0	0
GCA_000215425.2	21310	95.863	100	0	0	0	0	0	0	0	0	0	0	0	0	0	0	0	0	0	1
GCA_000247375.2	IS-105	95.75	99.869	0	0	0	0	0	0	0	0	0	0	0	0	0	0	0	0	0	1
GCA_000697845.1	21251	95.626	0	0	0	0	0	99.048	0	0	0	0	0	0	0	0	0	0	0	0	1
GCA_000831635.1	PB1-1	95.745	0	0	0	0	0	0	0	0	0	0	0	0	0	0	0	0	0	0	0
GCA_000831765.1	PB1-15-1	95.745	0	0	0	0	0	0	0	0	0	0	0	0	0	0	0	0	0	0	0
GCA_000831775.1	PB1-15-2	95.745	0	0	0	0	0	0	0	0	0	0	0	0	0	0	0	0	0	0	0
GCA_000831785.1	PB3-1	95.745	0	0	0	0	0	0	0	0	0	0	0	0	0	0	0	0	0	0	0
GCA_000831845.1	PB3-74	95.745	0	0	0	0	0	0	0	0	0	0	0	0	0	0	0	0	0	0	0
GCA_000831855.1	PB3-32-2	95.745	0	0	0	0	0	0	0	0	0	0	0	0	0	0	0	0	0	0	0
GCA_000831865.1	PB3-72	95.745	0	0	0	0	0	0	0	0	0	0	0	0	0	0	0	0	0	0	0
GCA_000831885.1	PB3-32-1	95.745	0	0	0	0	0	0	0	0	0	0	0	0	0	0	0	0	0	0	0
GCA_000831925.1	RB4	95.745	0	0	0	0	0	0	0	0	0	0	0	0	0	0	0	0	0	0	0
GCA_000831965.1	RB1	95.745	0	0	0	0	0	0	0	0	0	0	0	0	0	0	0	0	0	0	0
GCA_001191855.1	BSAR159_2	95.745	0	0	0	0	0	0	0	0	0	0	0	0	0	0	0	0	0	0	0
GCA_001192175.1	BSAR191_2	95.745	0	0	0	0	0	0	0	0	0	0	0	0	0	0	0	0	0	0	0
GCA_001193355.1	BSAR205	95.745	0	0	0	0	0	99.048	0	0	0	0	0	0	0	0	0	0	0	0	1
GCA_001194725.1	BSAR178_2	95.745	0	0	0	0	0	99.048	0	0	0	0	0	0	0	0	0	0	0	0	1
GCA_001196555.1	BSAR858	95.745	0	0	0	0	0	0	0	0	0	0	0	0	0	0	0	0	0	0	0
GCA_001196655.1	BSAR176_2	95.745	0	0	0	0	0	0	0	0	0	0	0	0	0	0	0	0	0	0	0
GCA_001196795.1	BSAR162_2	95.745	0	0	0	0	0	99.048	0	0	0	0	0	0	0	0	0	0	0	0	1
GCA_001197515.1	BSAR865	95.745	0	0	0	0	0	99.048	0	0	0	0	0	0	0	0	0	0	0	0	1
GCA_001197715.1	BSAR172_2	95.745	0	0	0	0	0	99.048	0	0	0	0	0	0	0	0	0	0	0	0	1
GCA_001199875.1	BSAR77	95.745	0	0	0	0	0	0	0	0	0	0	0	0	0	0	0	0	0	0	0
GCA_001201795.1	BSAR748	95.745	0	0	0	0	0	0	0	0	0	0	0	0	0	0	0	0	0	0	0
GCA_001205035.1	BSAR208	95.745	0	0	0	0	0	99.048	0	0	0	0	0	0	0	0	0	0	0	0	1
GCA_001205435.1	BSAR734	95.745	0	0	0	0	0	99.048	0	0	0	0	0	0	0	0	0	0	0	0	1
GCA_001206695.1	BSAR739	95.745	0	0	0	0	0	98.913	0	0	0	0	0	0	0	0	0	0	0	0	1
GCA_001207435.1	BSAR169_2	95.745	0	0	0	0	0	99.048	0	0	0	0	0	0	0	0	0	0	0	0	1
GCA_001208245.1	BSAR872	95.745	0	0	0	0	0	99.048	0	0	0	0	0	0	0	0	0	0	0	0	1
GCA_001208665.1	BSAR193_2	95.745	0	0	0	0	0	99.048	0	0	0	0	0	0	0	0	0	0	0	0	1
GCA_001209365.1	BSAR203	95.745	0	0	0	0	0	0	0	0	0	0	0	0	0	0	0	0	0	0	0
GCA_001209425.1	BSAR486	95.745	0	0	0	0	0	99.048	0	0	0	0	0	0	0	0	0	0	0	0	1
GCA_001209685.1	BSAR729	95.745	0	0	0	0	0	99.048	0	0	0	0	0	0	0	0	0	0	0	0	1
GCA_001210805.1	BSAR183_2	95.745	0	0	0	0	0	0	0	0	0	0	0	0	0	0	0	0	0	0	0
GCA_001210925.1	BSAR870	95.745	0	0	0	0	0	99.048	0	0	0	0	0	0	0	0	0	0	0	0	1
GCA_001212545.1	BSAR177_2	95.745	0	0	0	0	0	0	0	0	0	0	0	0	0	0	0	0	0	0	0
GCA_001223785.1	91/10795	95.745	0	0	0	0	0	0	0	0	0	0	0	0	0	0	0	0	0	0	0
GCA_001224365.1	HO 7286 0467 05	95.745	0	0	0	0	0	99.048	0	0	0	0	0	0	0	0	0	0	0	0	1
GCA_001224445.1	F827 28	95.745	0	0	0	0	0	0	0	0	0	0	0	0	0	0	0	0	0	0	0
GCA_001224765.1	RH 0600 0064 09	95.745	0	0	0	0	0	0	0	0	0	0	0	0	0	0	0	0	0	0	0
GCA_001225765.1	93/3696	95.745	0	0	0	0	0	99.048	0	0	0	0	0	0	0	0	0	0	0	0	1
GCA_001226685.1	F869 96	95.745	0	0	0	0	0	99.048	0	0	0	0	0	0	0	0	0	0	0	0	1
GCA_001226725.1	91/10759	95.745	0	0	0	0	0	99.048	0	0	0	0	0	0	0	0	0	0	0	0	1
GCA_001226965.1	98.4823.X	95.745	0	0	0	0	0	99.048	0	0	0	0	0	0	0	0	0	0	0	0	1
GCA_001227905.1	ARI31	95.745	0	0	0	0	0	0	0	0	0	0	0	0	0	0	0	0	0	0	0
GCA_001227945.1	ARI7	95.745	0	0	0	0	0	99.048	0	0	0	0	0	0	0	0	0	0	0	0	1
GCA_001228065.1	ARI12	95.745	0	0	0	0	0	99.048	0	0	0	0	0	0	0	0	0	0	0	0	1
GCA_001229725.1	W449 36	95.745	0	0	0	0	0	99.048	0	0	0	0	0	0	0	0	0	0	0	0	1
GCA_001229805.1	C720 MRSA	95.745	0	0	0	0	0	0	0	0	0	0	0	0	0	0	0	0	0	0	0
GCA_001230185.1	T277 06	95.745	0	0	0	0	0	0	0	0	0	0	0	0	0	0	0	0	0	0	0
GCA_001230225.1	H914 91	95.745	100	0	0	0	0	0	0	0	0	0	0	0	0	0	0	0	0	0	1
GCA_001230385.1	ARI29	95.745	0	0	0	0	0	0	0	0	0	0	0	0	0	0	0	0	0	0	0
GCA_001230765.1	M810 08	95.745	0	0	0	0	0	99.048	0	0	0	0	0	0	0	0	0	0	0	0	1
GCA_001231065.1	ARI26	95.745	0	0	0	0	0	99.048	0	0	0	0	0	0	0	0	0	0	0	0	1
GCA_001232105.1	91/11785	95.745	0	0	0	0	0	99.048	0	0	0	0	0	0	0	0	0	0	0	0	1
GCA_001233825.1	H182 MRSA	95.745	0	0	0	0	0	0	0	0	0	0	0	0	0	0	0	0	0	0	0
GCA_001234025.1	91/10977	95.745	0	0	0	0	0	99.048	0	0	0	0	0	0	0	0	0	0	0	0	1
GCA_001234725.1	NL 0113 99-5	0	0	0	0	0	0	0	0	0	0	0	0	0	0	0	0	0	0	0	0
GCA_001234925.1	07-03354-2	95.745	99.869	0	0	0	0	0	0	0	0	0	0	0	0	0	0	0	0	0	1
GCA_001236745.1	930.02	95.745	0	0	0	0	0	99.048	0	0	0	0	0	0	0	0	0	0	0	0	1
GCA_001237045.1	93/3697	95.745	0	0	0	0	0	99.048	0	0	0	0	0	0	0	0	0	0	0	0	1
GCA_001237505.1	91/10982	95.745	0	0	0	0	0	99.048	0	0	0	0	0	0	0	0	0	0	0	0	1
GCA_001238225.1	91/11046	95.745	0	0	0	0	0	99.048	0	0	0	0	0	0	0	0	0	0	0	0	1
GCA_001238685.1	91/10312	95.745	0	0	0	0	0	99.048	0	0	0	0	0	0	0	0	0	0	0	0	1
GCA_001238725.1	RH 0600 0125 09	95.745	0	0	0	0	0	0	0	0	0	0	0	0	0	0	0	0	0	0	0
GCA_001238845.1	90/9576	95.745	0	0	0	0	0	0	0	0	0	0	0	0	0	0	0	0	0	0	0
GCA_001239385.1	723.07	95.745	0	0	0	0	0	99.048	0	0	0	0	0	0	0	0	0	0	0	0	1
GCA_001349375.1	BSAR180	95.745	0	0	0	0	0	0	0	0	0	0	0	0	0	0	0	0	0	0	0
GCA_001349395.1	BSAR202	95.745	0	0	0	0	0	0	0	0	0	0	0	0	0	0	0	0	0	0	0
GCA_001349415.1	BSAR182	95.745	0	0	0	0	0	0	0	0	0	0	0	0	0	0	0	0	0	0	0
GCA_001349435.1	BSAR190_2	95.745	0	0	0	0	0	99.048	0	0	0	0	0	0	0	0	0	0	0	0	1
GCA_001349455.1	BSAR213	95.745	0	0	0	0	0	0	0	0	0	0	0	0	0	0	0	0	0	0	0
GCA_001349475.1	BSAR188_2	95.745	0	0	0	0	0	99.048	0	0	0	0	0	0	0	0	0	0	0	0	1
GCA_001349495.1	BSAR171_2	95.745	0	0	0	0	0	0	0	0	0	0	0	0	0	0	0	0	0	0	0
GCA_001349515.1	BSAR204_2	95.745	0	0	0	0	0	0	0	0	0	0	0	0	0	0	0	0	0	0	0
GCA_001349535.1	BSAR173_2	95.745	0	0	0	0	0	0	0	0	0	0	0	0	0	0	0	0	0	0	0
GCA_001349555.1	BSAR186_2	95.745	0	0	0	0	0	0	0	0	0	0	0	0	0	0	0	0	0	0	0
GCA_001349575.1	BSAR187_2	95.745	0	0	0	0	0	0	0	0	0	0	0	0	0	0	0	0	0	0	0
GCA_001349595.1	BSAR174_2	95.745	0	0	0	0	0	99.048	0	0	0	0	0	0	0	0	0	0	0	0	1
GCA_001349615.1	BSAR166_2	95.745	0	0	0	0	0	0	0	0	0	0	0	0	0	0	0	0	0	0	0
GCA_001349635.1	BSAR199_2	95.745	0	0	0	0	0	99.048	0	0	0	0	0	0	0	0	0	0	0	0	1
GCA_001349655.1	BSAR185_2	95.745	0	0	0	0	0	0	0	0	0	0	0	0	0	0	0	0	0	0	0
GCA_001349675.1	BSAR167_2	95.745	0	0	0	0	0	0	0	0	0	0	0	0	0	0	0	0	0	0	0
GCA_001349695.1	BSAR200_2	95.745	0	0	0	0	0	0	0	0	0	0	0	0	0	0	0	0	0	0	0
GCA_001349715.1	BSAR170_2	95.745	0	0	0	0	0	0	0	0	0	0	0	0	0	0	0	0	0	0	0
GCA_001349735.1	BSAR195_2	95.745	0	0	0	0	0	99.048	0	0	0	0	0	0	0	0	0	0	0	0	1
GCA_001349755.1	BSAR196_2	95.745	0	0	0	0	0	0	0	0	0	0	0	0	0	0	0	0	0	0	0
GCA_001349775.1	BSAR707	95.745	0	0	0	0	0	99.048	0	0	0	0	0	0	0	0	0	0	0	0	1
GCA_001349795.1	BSAR719	95.745	0	0	0	0	0	0	0	0	0	0	0	0	0	0	0	0	0	0	0
GCA_001349815.1	BSAR860	95.745	0	0	0	0	0	0	0	0	0	0	0	0	0	0	0	0	0	0	0
GCA_001349835.1	BSAR745	95.745	0	0	0	0	0	98.912	0	0	0	0	0	0	0	0	0	0	0	0	1
GCA_001349855.1	BSAR864	95.745	0	0	0	0	0	99.048	0	0	0	0	0	0	0	0	0	0	0	0	1
GCA_001349895.1	BSAR705	95.745	0	0	0	0	0	0	0	0	0	0	0	0	0	0	0	0	0	0	0
GCA_001349915.1	BSAR874	95.745	0	0	0	0	0	0	0	0	0	0	0	0	0	0	0	0	0	0	0
GCA_001349935.1	BSAR708	95.745	0	0	0	0	0	99.048	0	0	0	0	0	0	0	0	0	0	0	0	1
GCA_001349955.1	BSAR710	95.745	0	0	0	0	0	0	0	0	0	0	0	0	0	0	0	0	0	0	0
GCA_001349975.1	BSAR740	95.745	0	0	0	0	0	0	0	0	0	0	0	0	0	0	0	0	0	0	0
GCA_001349995.1	BSAR726	95.745	0	0	0	0	0	98.913	0	0	0	0	0	0	0	0	0	0	0	0	1
GCA_001350015.1	BSAR1006	95.745	0	0	0	0	0	0	0	0	0	0	0	0	0	0	0	0	0	0	0
GCA_001369415.1	SASCBU26	95.863	99.869	0	0	0	0	99.048	0	0	0	0	0	0	0	0	0	0	0	0	2
GCA_001720535.1	SAB_M_16	95.745	0	0	0	0	0	0	0	0	0	0	0	0	0	0	0	0	0	0	0
GCA_001720565.1	SAM_W_16	95.745	0	0	0	0	0	0	0	0	0	0	0	0	0	0	0	0	0	0	0
GCA_001756665.1	VB31683	95.863	100	0	0	0	0	99.048	0	0	0	0	0	0	0	0	0	0	0	0	2
GCA_001854965.1	VB9882	95.863	99.869	0	0	0	0	0	0	0	0	0	0	0	0	0	0	0	0	0	1
GCA_001855035.1	VB44094	95.863	100	0	0	0	0	99.048	0	0	0	0	0	0	0	0	0	0	0	0	2
GCA_001855135.1	VB20017	99.95	99.869	0	0	0	0	99.048	0	0	0	0	0	0	0	0	0	0	0	0	2
GCA_002097205.1	622	95.745	0	0	0	0	0	0	0	0	0	0	0	0	0	0	0	0	0	0	0
GCA_002097225.1	619	0	0	0	0	0	0	0	0	0	0	0	0	0	0	0	0	0	0	0	0
GCA_002097245.1	34	99.9	0	0	0	0	0	0	0	0	0	0	0	0	0	0	0	0	0	0	0
GCA_002097265.1	Q13/1/305	95.745	0	0	0	0	0	0	0	0	0	0	0	0	0	0	0	0	0	0	0
GCA_002097285.1	38	99.9	0	0	0	0	0	0	0	0	0	0	0	0	0	0	0	0	0	0	0
GCA_002097495.1	809	0	0	0	0	0	0	0	0	0	0	0	0	0	0	0	0	0	0	0	0
GCA_002097505.1	428	99.9	0	0	0	0	0	0	0	0	0	0	0	0	0	0	0	0	0	0	0
GCA_002843845.1	MR3	99.95	99.923	0	0	0	0	99.048	0	0	0	0	0	0	0	0	0	0	0	0	2
GCA_002887415.1	UV179	95.863	100	0	0	0	0	0	0	0	0	0	0	0	0	0	0	0	0	0	1
GCA_003038335.1	SAM-22	95.745	0	0	0	0	0	0	0	0	0	0	0	0	0	0	0	0	0	0	0
GCA_003038555.1	SAM-10	95.745	0	0	0	0	0	0	0	0	0	0	0	0	0	0	0	0	0	0	0
GCA_003068685.1	SAZ-W	95.745	0	0	0	0	0	0	0	0	0	0	0	0	0	0	0	0	0	0	0
GCA_003068725.1	SAZ-B	95.745	0	0	0	0	0	0	0	0	0	0	0	0	0	0	0	0	0	0	0
GCA_003236855.1	CM170	97.991	0	0	0	0	0	0	0	0	0	0	0	0	0	0	0	0	0	0	0
GCA_003237285.1	CM134	95.863	100	0	0	0	0	99.048	0	0	0	0	0	0	0	0	0	0	0	0	2
GCA_003237375.1	CM126	95.863	0	0	0	0	0	99.048	0	0	0	0	0	0	0	0	0	0	0	0	1
GCA_003237415.1	CM121	99.851	0	0	0	0	0	0	0	0	0	0	0	0	0	0	0	0	0	0	0
GCA_003238045.1	CM137	95.745	0	0	0	0	0	0	0	0	0	0	0	0	0	0	0	0	0	0	0
GCA_003238165.1	CM122	95.745	0	0	0	0	0	0	0	0	0	0	0	0	0	0	0	0	0	0	0
GCA_003238195.1	CM115	95.863	0	0	0	0	0	0	0	0	0	0	0	0	100	0	0	0	0	0	1
GCA_003238475.1	CM65	95.745	0	0	0	0	0	99.048	0	0	0	0	0	0	0	0	0	0	0	0	1
GCA_003238575.1	CM56	95.745	0	0	0	0	0	99.048	0	0	0	0	0	0	0	0	0	0	0	0	1
GCA_003238695.1	CM39	95.745	0	0	0	0	0	99.048	0	0	0	0	0	0	0	0	0	0	0	0	1
GCA_003238835.1	CM25	95.745	0	0	0	0	0	99.048	0	0	0	0	0	0	0	0	0	0	0	0	1
GCA_003238845.1	CM24	95.492	0	0	0	0	0	0	0	0	0	0	0	0	0	0	0	0	0	0	0
GCA_003238995.1	CM8	95.863	99.869	0	0	0	0	0	0	0	0	0	0	0	0	0	0	0	0	0	1
GCA_003239265.1	CM136	95.711	0	0	0	0	0	99.048	0	0	100	0	0	0	0	0	0	0	0	0	2
GCA_003239295.1	CM119	95.745	0	0	0	0	0	0	0	0	0	0	0	0	0	0	0	0	0	0	0
GCA_003239535.1	CM73	95.745	0	0	0	0	0	0	0	0	0	0	0	0	0	0	0	0	0	0	0
GCA_003239925.1	CM74	95.863	0	0	0	0	0	0	0	0	0	0	0	0	0	0	0	0	0	0	0
GCA_003239945.1	CM71	95.745	0	0	0	0	0	99.048	0	0	0	0	0	0	0	0	0	0	0	0	1
GCA_003240005.1	CM62	95.745	0	0	0	0	0	99.048	0	0	0	0	0	0	0	0	0	0	0	0	1
GCA_003240105.1	CM47	95.745	0	0	0	0	0	0	0	0	0	0	0	0	0	0	0	0	0	0	0
GCA_003284745.1	VF434	95.745	0	0	0	0	0	99.048	0	0	0	0	0	0	0	0	0	0	0	0	1
GCA_003352765.1	15ANR14877	97.991	100	0	0	0	0	0	0	0	0	0	0	0	0	0	0	0	0	0	1
GCA_003725435.1	VB25679	95.863	100	0	0	0	0	0	0	0	0	0	0	0	0	0	0	0	0	0	1
GCA_005047515.1	41	95.863	0	0	0	0	0	0	0	0	0	0	0	0	0	0	0	0	0	0	0
GCA_005048435.1	40	95.863	0	0	0	0	0	0	0	0	0	0	0	0	0	0	0	0	0	0	0
GCA_900017485.1	st303	95.745	0	0	0	0	0	99.048	0	0	0	0	0	0	0	0	0	0	0	0	1
GCA_900017515.1	st687	95.745	0	0	0	0	0	0	0	0	0	0	0	0	0	0	0	0	0	0	0
GCA_900017525.1	st694	95.745	0	0	0	0	0	99.048	0	0	0	0	0	0	0	0	0	0	0	0	1
GCA_900017535.1	st854	95.745	0	0	0	0	0	99.048	0	0	0	0	0	0	0	0	0	0	0	0	1
GCA_900017545.1	st991	95.745	0	0	0	0	0	99.048	0	0	0	0	0	0	0	0	0	0	0	0	1
GCA_900017585.1	st1443	95.745	0	0	0	0	0	99.048	0	0	0	0	0	0	0	0	0	0	0	0	1
GCA_900017605.1	st2493	95.745	0	0	0	0	0	99.048	0	0	0	0	0	0	0	0	0	0	0	0	1
GCA_900017615.1	st2515	95.745	0	0	0	0	0	0	0	0	0	0	0	0	0	0	0	0	0	0	0
GCA_900017635.1	st2523	95.745	0	0	0	0	0	0	0	0	0	0	0	0	0	0	0	0	0	0	0
GCA_900017645.1	st2530	95.745	0	0	0	0	0	99.048	0	0	0	0	0	0	0	0	0	0	0	0	1
GCA_900017665.1	st2566	95.745	0	0	0	0	0	99.048	0	0	0	0	0	0	0	0	0	0	0	0	1
GCA_900017675.1	st2572	95.745	0	0	0	0	0	99.048	0	0	0	0	0	0	0	0	0	0	0	0	1
GCA_900017685.1	st2578	95.745	0	0	0	0	0	99.048	0	0	0	0	0	0	0	0	0	0	0	0	1
GCA_900017695.1	st2579	95.745	0	0	0	0	0	99.048	0	0	0	0	0	0	0	0	0	0	0	0	1
GCA_900017705.1	st2584	95.745	0	0	0	0	0	0	0	0	0	0	0	0	0	0	0	0	0	0	0
GCA_900017715.1	st2585	95.745	0	0	0	0	0	0	0	0	0	0	0	0	0	0	0	0	0	0	0
GCA_900017965.1	st964	95.745	0	0	0	0	0	99.048	0	0	0	0	0	0	0	0	0	0	0	0	1
GCA_900017975.1	st1000	95.745	0	0	0	0	0	0	0	0	0	0	0	0	0	0	0	0	0	0	0
GCA_900017985.1	st1002	95.745	0	0	0	0	0	0	0	0	0	0	0	0	0	0	0	0	0	0	0
GCA_900017995.1	st1009	95.745	0	0	0	0	0	99.048	0	0	0	0	0	0	0	0	0	0	0	0	1
GCA_900018005.1	st1023	95.745	0	0	0	0	0	99.048	0	0	0	0	0	0	0	0	0	0	0	0	1
GCA_900018015.1	st1016	95.745	0	0	0	0	0	0	0	0	0	0	0	0	0	0	0	0	0	0	0
GCA_900018025.1	st1024	95.745	0	0	0	0	0	0	0	0	0	0	0	0	0	0	0	0	0	0	0
GCA_900018045.1	st1044	95.745	0	0	0	0	0	99.048	0	0	0	0	0	0	0	0	0	0	0	0	1
GCA_900018055.1	st1061	95.745	0	0	0	0	0	99.048	0	0	0	0	0	0	0	0	0	0	0	0	1
GCA_900018075.1	st1069	95.745	0	0	0	0	0	99.048	0	0	0	0	0	0	0	0	0	0	0	0	1
GCA_900018085.1	st1105	95.745	0	0	0	0	0	99.048	0	0	0	0	0	0	0	0	0	0	0	0	1
GCA_900018095.1	st1114	95.745	0	0	0	0	0	99.048	0	0	0	0	0	0	0	0	0	0	0	0	1
GCA_900018105.1	st1142	95.745	0	0	0	0	0	0	0	0	0	0	0	0	0	0	0	0	0	0	0
GCA_900018115.1	st1149	95.745	0	0	0	0	0	0	0	0	0	0	0	0	0	0	0	0	0	0	0
GCA_900018145.1	st1229	95.745	0	0	0	0	0	99.048	0	0	0	0	0	0	0	0	0	0	0	0	1
GCA_900018155.1	st1243	95.745	0	0	0	0	0	0	0	0	0	0	0	0	0	0	0	0	0	0	0
GCA_900018165.1	st1247	95.745	0	0	0	0	0	99.048	0	0	0	0	0	0	0	0	0	0	0	0	1
GCA_900018175.1	st1249	95.745	0	0	0	0	0	99.048	0	0	0	0	0	0	0	0	0	0	0	0	1
GCA_900018185.1	st1268	95.745	0	0	0	0	0	99.048	0	0	0	0	0	0	0	0	0	0	0	0	1
GCA_900018195.1	st1283	95.745	0	0	0	0	0	99.048	0	0	0	0	0	0	0	0	0	0	0	0	1
GCA_900018205.1	st1285	95.745	0	0	0	0	0	99.048	0	0	0	0	0	0	0	0	0	0	0	0	1
GCA_900018215.1	st1296	95.745	0	0	0	0	0	99.048	0	0	0	0	0	0	0	0	0	0	0	0	1
GCA_900018255.1	st1357	95.745	0	0	0	0	0	99.048	0	0	0	0	0	0	0	0	0	0	0	0	1
GCA_900018265.1	st1377	95.745	0	0	0	0	0	99.048	0	0	0	0	0	0	0	0	0	0	0	0	1
GCA_900018275.1	st1388	95.745	0	0	0	0	0	99.048	0	0	0	0	0	0	0	0	0	0	0	0	1
GCA_900018285.1	st1401	95.863	99.869	0	0	0	0	99.048	0	0	0	0	0	0	0	0	0	0	0	0	2
GCA_900018305.1	st1452	95.745	0	0	0	0	0	0	0	0	0	0	0	0	0	0	0	0	0	0	0
GCA_900018325.1	st1465	95.745	0	0	0	0	0	99.048	0	0	0	0	0	0	100	0	0	0	0	0	2
GCA_900018685.1	st282	95.745	0	0	0	0	0	99.048	0	0	0	0	0	0	0	0	0	0	0	0	1
GCA_900018725.1	st363	95.745	0	0	0	0	0	99.048	0	0	0	0	0	0	0	0	0	0	0	0	1
GCA_900018735.1	st522	95.745	0	0	0	0	0	99.048	0	0	0	0	0	0	0	0	0	0	0	0	1
GCA_900018745.1	st820	95.745	0	0	0	0	0	99.048	0	0	0	0	0	0	0	0	0	0	0	0	1
GCA_900018755.1	st11	95.745	0	0	0	0	0	99.048	0	0	0	0	0	0	0	0	0	0	0	0	1
GCA_900018775.1	st216	95.745	0	0	0	0	0	99.048	0	0	0	0	0	0	0	0	0	0	0	0	1
GCA_900019035.1	st105	95.745	0	0	0	0	0	99.048	0	0	0	0	0	0	0	0	0	0	0	0	1
GCA_900019055.1	st85	95.745	0	0	0	0	0	0	0	0	0	0	0	0	0	0	0	0	0	0	0
GCA_900019065.1	st148	95.745	0	0	0	0	0	99.048	0	0	0	0	0	0	0	0	0	0	0	0	1
GCA_900019075.1	st65	95.745	0	0	0	0	0	99.048	0	0	0	0	0	0	0	0	0	0	0	0	1
GCA_900019085.1	st164	95.745	0	0	0	0	0	99.048	0	0	0	0	0	0	0	0	0	0	0	0	1
GCA_900019105.1	st41	95.745	0	0	0	0	0	99.048	0	0	0	0	0	0	0	0	0	0	0	0	1
GCA_900019115.1	st95	95.745	0	0	0	0	0	99.048	0	0	0	0	0	0	0	0	0	0	0	0	1
GCA_900019125.1	st194	95.745	0	0	0	0	0	99.048	0	0	0	0	0	0	0	0	0	0	0	0	1
GCA_900019135.1	st810	95.745	0	0	0	0	0	0	0	0	0	0	0	0	0	0	0	0	0	0	0
GCA_900019155.1	st703	95.745	0	0	0	0	0	0	0	0	0	0	0	0	0	0	0	0	0	0	0
GCA_900019175.1	st754	95.745	0	0	0	0	0	99.048	0	0	0	0	0	0	0	0	0	0	0	0	1
GCA_900019195.1	st987	95.745	0	0	0	0	0	99.048	0	0	0	0	0	0	0	0	0	0	0	0	1
GCA_900019205.1	st1449	95.745	0	0	0	0	0	0	0	0	0	0	0	0	0	0	0	0	0	0	0
GCA_900020225.1	st1162	95.745	0	0	0	0	0	0	0	0	0	0	0	0	0	0	0	0	0	0	0
GCA_900020275.1	st825	95.745	0	0	0	0	0	0	0	0	0	0	0	0	0	0	0	0	0	0	0
GCA_900020285.1	st831	95.745	0	0	0	0	0	99.048	0	0	0	0	0	0	0	0	0	0	0	0	1
GCA_900020295.1	st103	95.745	0	0	0	0	0	99.048	0	0	0	0	0	0	0	0	0	0	0	0	1
GCA_900020305.1	st555	95.745	0	0	0	0	0	99.048	0	0	0	0	0	0	0	0	0	0	0	0	1
GCA_900020315.1	st567	95.745	0	0	0	0	0	0	0	0	0	0	0	0	0	0	0	0	0	0	0
GCA_900020325.1	st673	95.745	0	0	0	0	0	0	0	0	0	0	0	0	0	0	0	0	0	0	0
GCA_900020335.1	st911	95.745	0	0	0	0	0	0	0	0	0	0	0	0	0	0	0	0	0	0	0
GCA_900020365.1	st997	95.745	0	0	0	0	0	99.048	0	0	0	0	0	0	0	0	0	0	0	0	1
GCA_900020375.1	st1059	95.745	0	0	0	0	0	99.048	0	0	0	0	0	0	0	0	0	0	0	0	1
GCA_900020385.1	st1134	95.745	0	0	0	0	0	99.048	0	0	0	0	0	0	0	0	0	0	0	0	1
GCA_900020405.1	st1277	95.745	0	0	0	0	0	99.048	0	0	0	0	0	0	0	0	0	0	0	0	1
GCA_900020415.1	st1281	95.745	0	0	0	0	0	99.048	0	0	0	0	0	0	0	0	0	0	0	0	1
GCA_900020425.1	st1286	95.745	0	0	0	0	0	99.048	0	0	0	0	0	0	0	0	0	0	0	0	1
GCA_900020435.1	st1527	95.745	0	0	0	0	0	99.048	0	0	0	0	0	0	0	0	0	0	0	0	1
GCA_900020465.1	st999	95.745	0	0	0	0	0	99.048	0	0	0	0	0	0	0	0	0	0	0	0	1
GCA_900020475.1	st1039	95.745	0	0	0	0	0	99.048	0	0	0	0	0	0	0	0	0	0	0	0	1
GCA_900022595.1	st651	95.745	0	0	0	0	0	99.048	0	0	0	0	0	0	0	0	0	0	0	0	1
GCA_900022605.1	st121	95.745	0	0	0	0	0	99.048	0	0	0	0	0	0	0	0	0	0	0	0	1
GCA_900022615.1	st401	95.745	0	0	0	0	0	99.048	0	0	0	0	0	0	0	0	0	0	0	0	1
GCA_900022625.1	st1123	95.745	0	0	0	0	0	99.048	0	0	0	0	0	0	0	0	0	0	0	0	1
GCA_900022635.1	st1386	95.745	0	0	0	0	0	99.048	0	0	0	0	0	0	0	0	0	0	0	0	1
GCA_900022675.1	st1816	95.745	0	0	0	0	0	99.048	0	0	0	0	0	0	0	0	0	0	0	0	1
GCA_900024965.1	st3179	95.745	0	0	0	0	0	0	0	0	0	0	0	0	0	0	0	0	0	0	0
GCA_900024995.1	st263	95.745	0	0	0	0	0	99.048	0	0	0	0	0	0	0	0	0	0	0	0	1
GCA_900025015.1	st571	95.745	0	0	0	0	0	99.048	0	0	0	0	0	0	0	0	0	0	0	0	1
GCA_900031645.1	st1846	95.745	0	0	0	0	0	99.048	0	0	0	0	0	0	0	0	0	0	0	0	1
GCA_900031655.1	st1906	95.745	0	0	0	0	0	99.048	0	0	0	0	0	0	0	0	0	0	0	0	1
GCA_900031675.1	st2201	95.745	100	0	0	0	0	0	0	0	0	0	0	0	0	0	0	0	0	0	1
GCA_900033745.1	st2593	95.745	0	0	0	0	0	0	0	0	0	0	0	0	0	0	0	0	0	0	0
GCA_900033755.1	st830	95.745	0	0	0	0	0	99.048	0	0	0	0	0	0	0	0	0	0	0	0	1
GCA_900033775.1	st848	95.745	0	0	0	0	0	99.048	0	0	0	0	0	0	0	0	0	0	0	0	1
GCA_900035585.1	st2672	95.745	0	0	0	0	0	99.048	0	0	0	0	0	0	0	0	0	0	0	0	1
GCA_900035595.1	st2803	95.745	0	0	0	100	0	0	0	0	0	0	0	0	99.792	0	100	0	99.961	0	2
GCA_900035645.1	st78	95.745	0	0	0	0	0	99.048	0	0	0	0	0	0	0	0	0	0	0	0	1
GCA_900035655.1	st39	95.745	0	0	0	0	0	0	0	0	0	0	0	0	0	0	0	0	0	0	0
GCA_900035665.1	st70	95.745	0	0	0	0	0	99.048	0	0	0	0	0	0	0	0	0	0	0	0	1
GCA_900035675.1	st57	95.745	0	0	0	0	0	99.048	0	0	0	0	0	0	0	0	0	0	0	0	1
GCA_900035685.1	st38	95.745	0	0	0	0	0	99.048	0	0	0	0	0	0	0	0	0	0	0	0	1
GCA_900035695.1	st189	95.745	0	0	0	0	0	0	0	0	0	0	0	0	0	0	0	0	0	0	0
GCA_900035715.1	st207	95.745	0	0	0	0	0	0	0	0	0	0	0	0	0	0	0	0	0	0	0
GCA_900035725.1	st217	95.745	0	0	0	0	0	99.048	0	0	0	0	0	0	0	0	0	0	0	0	1
GCA_900035755.1	st364	95.745	0	0	0	0	0	99.048	0	0	0	0	0	0	0	0	0	0	0	0	1
GCA_900035765.1	st402	95.745	0	0	0	0	0	99.048	0	0	0	0	0	0	0	0	0	0	0	0	1
GCA_900035775.1	st410	95.745	0	0	0	0	0	99.048	0	0	0	0	0	0	0	0	0	0	0	0	1
GCA_900035785.1	st413	95.745	0	0	0	0	0	99.048	0	0	0	0	0	0	0	0	0	0	0	0	1
GCA_900035795.1	st418	95.745	0	0	0	0	0	99.048	0	0	0	0	0	0	0	0	0	0	0	0	1
GCA_900035805.1	st423	95.745	0	0	0	0	0	99.048	0	0	0	0	0	0	0	0	0	0	0	0	1
GCA_900035815.1	st426	95.745	0	0	0	0	0	0	0	0	0	0	0	0	0	0	0	0	0	0	0
GCA_900035825.1	st469	95.745	0	0	0	0	0	99.048	0	0	0	0	0	0	0	0	0	0	0	0	1
GCA_900035855.1	st624	95.745	0	0	0	0	0	99.048	0	0	0	0	0	0	0	0	0	0	0	0	1
GCA_900035865.1	st626	95.745	0	0	0	0	0	99.048	0	0	0	0	0	0	0	0	0	0	0	0	1
GCA_900035885.1	st666	95.745	0	0	0	0	0	0	0	0	0	0	0	0	0	0	0	0	0	0	0
GCA_900035895.1	st685	95.745	0	0	0	0	0	0	0	0	0	0	0	0	0	0	0	0	0	0	0
GCA_900035905.1	st688	95.745	0	0	0	0	0	99.048	0	0	0	0	0	0	0	0	0	0	0	0	1
GCA_900035925.1	st701	95.745	0	0	0	0	0	99.048	0	0	0	0	0	0	0	0	0	0	0	0	1
GCA_900035935.1	st755	95.745	0	0	0	0	0	0	0	0	0	0	0	0	99.792	0	100	0	99.972	0	1
GCA_900036395.1	st1797	95.745	0	0	0	0	0	99.048	0	0	0	0	0	0	0	0	0	0	0	0	1
GCA_900036405.1	st1965	95.745	0	0	0	0	0	99.048	0	0	0	0	0	0	0	0	0	0	0	0	1
GCA_900036415.1	st2227	95.745	0	0	0	0	0	99.048	0	0	0	0	0	0	0	0	0	0	0	0	1
GCA_900036885.1	st2107	95.745	0	0	0	0	0	0	0	0	0	0	0	0	0	0	0	0	0	0	0
GCA_900036895.1	st1931	95.745	0	0	0	0	0	95.238	0	0	0	0	0	0	0	0	0	0	0	0	1
GCA_900036905.1	st2261	95.745	0	0	0	0	0	0	0	0	0	0	0	0	0	0	0	0	0	0	0
GCA_900036915.1	st1014S	95.745	0	0	0	0	0	99.048	0	0	0	0	0	0	0	0	0	0	0	0	1
GCA_900036925.1	st833	95.745	0	0	0	0	0	0	0	0	0	0	0	0	0	0	0	0	0	0	0
GCA_900036945.1	st865	95.745	0	0	0	0	0	99.048	0	0	0	0	0	0	0	0	0	0	0	0	1
GCA_900037595.1	st1748	95.745	0	0	0	0	0	99.048	0	0	0	0	0	0	0	0	0	0	0	0	1
GCA_900037605.1	st2003	95.745	0	0	0	0	0	0	0	0	0	0	0	0	0	0	0	0	0	0	0
GCA_900037635.1	st757	95.745	0	0	0	0	0	99.048	0	0	0	0	0	0	0	0	0	0	0	0	1
GCA_900037655.1	st766	95.745	0	0	0	0	0	99.048	0	0	0	0	0	0	0	0	0	0	0	0	1
GCA_900037665.1	st787	95.745	0	0	0	0	0	0	0	0	0	0	0	0	0	0	0	0	0	0	0
GCA_900037675.1	st172	95.745	0	0	0	0	0	99.048	0	0	0	0	0	0	0	0	0	0	0	0	1
GCA_900037685.1	st203	95.745	0	0	0	0	0	0	0	0	0	0	0	0	0	0	0	0	0	0	0
GCA_900037695.1	st427	95.745	0	0	0	0	0	99.048	0	0	0	0	0	0	0	0	0	0	0	0	1
GCA_900037725.1	st857	95.745	0	0	0	0	0	99.048	0	0	0	0	0	0	0	0	0	0	0	0	1
GCA_900037735.1	st864	95.745	0	0	0	0	0	99.048	0	0	0	0	0	0	0	0	0	0	0	0	1
GCA_900037745.1	st866	95.745	0	0	0	0	0	99.184	0	0	0	0	0	0	0	0	0	0	0	0	1
GCA_900037755.1	st885	95.745	0	0	0	0	0	0	0	0	0	0	0	0	0	0	0	0	0	0	0
GCA_900037775.1	st909	95.745	0	0	0	0	0	99.048	0	0	0	0	0	0	0	0	0	0	0	0	1
GCA_900037785.1	st940	95.745	0	0	0	0	0	99.048	0	0	0	0	0	0	0	0	0	0	0	0	1
GCA_900037795.1	st942	95.745	0	0	0	0	0	99.048	0	0	0	0	0	0	0	0	0	0	0	0	1
GCA_900037815.1	st1015	95.745	0	0	0	0	0	99.048	0	0	0	0	0	0	0	0	0	0	0	0	1
GCA_900037825.1	st1075	95.745	0	0	0	0	0	99.048	0	0	0	0	0	0	0	0	0	0	0	0	1
GCA_900037835.1	st1071	95.745	0	0	0	0	0	99.048	0	0	0	0	0	0	0	0	0	0	0	0	1
GCA_900037845.1	st1079	95.745	0	0	0	0	0	0	0	0	0	0	0	0	0	0	0	0	0	0	0
GCA_900037855.1	st1110	95.745	0	0	0	0	0	0	0	0	0	0	0	0	0	0	0	0	0	0	0
GCA_900037865.1	st1116	95.745	0	0	0	0	0	99.048	0	0	0	0	0	0	0	0	0	0	0	0	1
GCA_900037875.1	st1120	95.745	0	0	0	0	0	99.048	0	0	0	0	0	0	0	0	0	0	0	0	1
GCA_900037885.1	st1141	95.745	0	0	0	0	0	0	0	0	0	0	0	0	0	0	0	0	0	0	0
GCA_900037895.1	st1148	95.745	0	0	0	0	0	0	0	0	0	0	0	0	0	0	0	0	0	0	0
GCA_900037905.1	st1155	95.745	0	0	0	0	0	99.048	0	0	0	0	0	0	0	0	0	0	0	0	1
GCA_900037915.1	st1163	95.745	0	0	0	0	0	99.048	0	0	0	0	0	0	0	0	0	0	0	0	1
GCA_900037935.1	st1173	95.745	0	0	0	0	0	99.048	0	0	0	0	0	0	0	0	0	0	0	0	1
GCA_900037945.1	st1194	95.745	0	0	0	0	0	99.048	0	0	0	0	0	0	0	0	0	0	0	0	1
GCA_900037955.1	st1202	95.745	0	0	0	0	0	99.048	0	0	0	0	0	0	0	0	0	0	0	0	1
GCA_900037965.1	st1211	95.745	0	0	0	0	0	0	0	0	0	0	0	0	0	0	0	0	0	0	0
GCA_900037975.1	st1216	95.745	0	0	0	0	0	99.048	0	0	0	0	0	0	0	0	0	0	0	0	1
GCA_900038195.1	st176	95.745	0	0	0	0	0	99.048	0	0	0	0	0	0	0	0	0	0	0	0	1
GCA_900038205.1	st180	95.745	0	0	0	0	0	99.048	0	0	0	0	0	0	0	0	0	0	0	0	1
GCA_900038215.1	st185	95.745	0	0	0	0	0	99.048	0	0	0	0	0	0	0	0	0	0	0	0	1
GCA_900038225.1	st187	95.745	0	0	0	0	0	0	0	0	0	0	0	0	0	0	0	0	0	0	0
GCA_900038235.1	st213	95.745	0	0	0	0	0	99.048	0	0	0	0	0	0	0	0	0	0	0	0	1
GCA_900038265.1	st234	95.745	0	0	0	0	0	99.048	0	0	0	0	0	0	0	0	0	0	0	0	1
GCA_900038275.1	st235	95.745	0	0	0	0	0	0	0	0	0	0	0	0	0	0	0	0	0	0	0
GCA_900038295.1	st246	95.745	0	0	0	0	0	99.048	0	0	0	0	0	0	0	0	0	0	0	0	1
GCA_900038305.1	st311	95.745	0	0	0	0	0	99.048	0	0	0	0	0	0	0	0	0	0	0	0	1
GCA_900038325.1	st378	95.745	0	0	0	0	0	0	0	0	0	0	0	0	0	0	0	0	0	0	0
GCA_900038335.1	st397	95.745	0	0	0	0	0	99.048	0	0	0	0	0	0	0	0	0	0	0	0	1
GCA_900038355.1	st551	95.745	0	0	0	0	0	99.048	0	0	0	0	0	0	0	0	0	0	0	0	1
GCA_900038385.1	st598	95.745	0	0	0	0	0	99.048	0	0	0	0	0	0	0	0	0	0	0	0	1
GCA_900038395.1	st686	95.745	0	0	0	0	0	99.048	0	0	0	0	0	0	0	0	0	0	0	0	1
GCA_900038425.1	st837	95.745	0	0	0	0	0	99.048	0	0	0	0	0	0	0	0	0	0	0	0	1
GCA_900038435.1	st63	95.745	0	0	0	0	0	0	0	0	0	0	0	0	0	0	0	0	0	0	0
GCA_900038445.1	st77	95.745	0	0	0	0	0	0	0	0	0	0	0	0	0	0	0	0	0	0	0
GCA_900038455.1	st93	95.745	0	0	0	0	0	99.048	0	0	0	0	0	0	0	0	0	0	0	0	1
GCA_900038465.1	st289	95.745	0	0	0	0	0	99.048	0	0	0	0	0	0	0	0	0	0	0	0	1
GCA_900038475.1	st301	95.745	0	0	0	0	0	99.048	0	0	0	0	0	0	0	0	0	0	0	0	1
GCA_900038485.1	st420	95.745	0	0	0	0	0	99.048	0	0	0	0	0	0	0	0	0	0	0	0	1
GCA_900038495.1	st432	95.745	0	0	0	0	0	99.048	0	0	0	0	0	0	0	0	0	0	0	0	1
GCA_900038505.1	st463	95.745	0	0	0	0	0	99.048	0	0	0	0	0	0	0	0	0	0	0	0	1
GCA_900038515.1	st525	95.745	0	0	0	0	0	0	0	0	0	0	0	0	0	0	0	0	0	0	0
GCA_900038525.1	st977	95.745	0	0	0	0	0	99.048	0	0	0	0	0	0	0	0	0	0	0	0	1
GCA_900038535.1	st1004	95.745	0	0	0	0	0	99.048	0	0	0	0	0	0	0	0	0	0	0	0	1
GCA_900038545.1	st1045	95.745	0	0	0	0	0	99.048	0	0	0	0	0	0	0	0	0	0	0	0	1
GCA_900038555.1	st1111	95.745	0	0	0	0	0	99.048	0	0	0	0	0	0	0	0	0	0	0	0	1
GCA_900038565.1	st1182	95.745	0	0	0	0	0	99.048	0	0	0	0	0	0	0	0	0	0	0	0	1
GCA_900038575.1	st1185	95.745	0	0	0	0	0	99.048	0	0	0	0	0	0	0	0	0	0	0	0	1
GCA_900038715.1	st170	95.745	0	0	0	0	0	99.048	0	0	0	0	0	0	0	0	0	0	0	0	1
GCA_900038725.1	st399	95.745	0	0	0	0	0	99.048	0	0	0	0	0	0	0	0	0	0	0	0	1
GCA_900038745.1	st425	95.745	0	0	0	0	0	99.048	0	0	0	0	0	0	0	0	0	0	0	0	1
GCA_900038755.1	st443	95.745	0	0	0	0	0	0	0	0	0	0	0	0	0	0	0	0	0	0	0
GCA_900038825.1	st145	95.745	0	0	0	0	0	99.048	0	0	0	0	0	0	0	0	0	0	0	0	1
GCA_900038835.1	st236	95.745	0	0	0	0	0	0	0	0	0	0	0	0	0	0	0	0	0	0	0
GCA_900038875.1	st454	95.745	0	0	0	0	0	0	0	0	0	0	0	0	0	0	0	0	0	0	0
GCA_900038885.1	st506	95.745	0	0	0	0	0	99.048	0	0	0	0	0	0	0	0	0	0	0	0	1
GCA_900038915.1	st882	95.745	0	0	0	0	0	0	0	0	0	0	0	0	0	0	0	0	0	0	0
GCA_900038925.1	st888	95.745	0	0	0	0	0	99.048	0	0	0	0	0	0	0	0	0	0	0	0	1
GCA_900038935.1	st961	95.745	0	0	0	0	0	99.048	0	0	0	0	0	0	0	0	0	0	0	0	1
GCA_900038945.1	st998	95.745	0	0	0	0	0	99.048	0	0	0	0	0	0	0	0	0	0	0	0	1
GCA_900038965.1	st1097	95.745	0	0	0	0	0	99.048	0	0	0	0	0	0	0	0	0	0	0	0	1
GCA_900038975.1	st1156	95.745	0	0	0	0	0	0	0	0	0	0	0	0	0	0	0	0	0	0	0
GCA_900038985.1	st1177	95.745	0	0	0	0	0	0	0	0	0	0	0	0	0	0	0	0	0	0	0
GCA_900038995.1	st1272	95.626	0	0	0	0	0	99.048	0	0	0	0	0	0	0	0	0	0	0	0	1
GCA_900039005.1	st1300	95.745	0	0	0	0	0	0	0	0	0	0	0	0	0	0	0	0	0	0	0
GCA_900039025.1	st1317	95.745	0	0	0	0	0	0	0	0	0	0	0	0	0	0	0	0	0	0	0
GCA_900039035.1	st1323	95.745	0	0	0	0	0	99.048	0	0	0	0	0	0	0	0	0	0	0	0	1
GCA_900039045.1	st1336	95.626	0	0	0	0	0	99.048	0	0	0	0	0	0	0	0	0	0	0	0	1
GCA_900039055.1	st1378	95.745	0	0	0	0	0	99.048	0	0	0	0	0	0	0	0	0	0	0	0	1
GCA_900039065.1	st1450	95.745	0	0	0	0	0	0	0	0	0	0	0	0	0	0	0	0	0	0	0
GCA_900039085.1	st1461	95.745	0	0	0	0	0	0	0	0	0	0	0	0	0	0	0	0	0	0	0
GCA_900039095.1	st1477	95.745	0	0	0	0	0	99.048	0	0	0	0	0	0	0	0	0	0	0	0	1
GCA_900039115.1	st1496	95.745	0	0	0	0	0	99.048	0	0	0	0	0	0	0	0	0	0	0	0	1
GCA_900039135.1	st1506	95.745	0	0	0	0	0	99.048	0	0	0	0	0	0	0	0	0	0	0	0	1
GCA_900039145.1	st1523	95.745	0	0	0	0	0	99.048	0	0	0	0	0	0	0	0	0	0	0	0	1
GCA_900039155.1	st1530	95.745	0	0	0	0	0	99.048	0	0	0	0	0	0	0	0	0	0	0	0	1
GCA_900039165.1	st1540	95.745	0	0	0	0	0	99.048	0	0	0	0	0	0	0	0	0	0	0	0	1
GCA_900039175.1	st1536	95.745	0	0	0	0	0	0	0	0	0	0	0	0	0	0	0	0	0	0	0
GCA_900039185.1	st1547	95.745	0	0	0	0	0	99.048	0	0	0	0	0	0	0	0	0	0	0	0	1
GCA_900039195.1	st1549	95.745	0	0	0	0	0	99.048	0	0	0	0	0	0	0	0	0	0	0	0	1
GCA_900039215.1	st1571	95.745	0	0	0	0	0	99.048	0	0	0	0	0	0	0	0	0	0	0	0	1
GCA_900039675.1	st584	95.745	0	0	0	0	0	99.048	0	0	0	0	0	0	0	0	0	0	0	0	1
GCA_900039695.1	st725	95.745	0	0	0	0	0	99.048	0	0	0	0	0	0	0	0	0	0	0	0	1
GCA_900039705.1	st273	95.745	0	0	0	0	0	99.048	0	0	0	0	0	0	0	0	0	0	0	0	1
GCA_900039715.1	st978	95.745	0	0	0	0	0	99.048	0	0	0	0	0	0	0	0	0	0	0	0	1
GCA_900039725.1	st1259	95.745	0	0	0	0	0	99.048	0	0	0	0	0	0	0	0	0	0	0	0	1
GCA_900039745.1	st1270	95.745	0	0	0	0	0	99.048	0	0	0	0	0	0	0	0	0	0	0	0	1
GCA_900039755.1	st1321	99.9	0	0	0	0	0	99.048	0	0	0	0	0	0	0	0	0	0	0	0	1
GCA_900039765.1	st1326	95.745	0	0	0	0	0	0	0	0	0	0	0	0	0	0	0	0	0	0	0
GCA_900039775.1	st1354	95.745	0	0	0	0	0	99.048	0	0	0	0	0	0	0	0	0	0	0	0	1
GCA_900039785.1	st1383	95.745	0	0	0	0	0	99.048	0	0	0	0	0	0	0	0	0	0	0	0	1
GCA_900039795.1	st1426	95.745	0	0	0	0	0	0	0	0	0	0	0	0	0	0	0	0	0	0	0
GCA_900039805.1	st1429	95.745	0	0	0	0	0	0	0	0	0	0	0	0	0	0	0	0	0	0	0
GCA_900039815.1	st1433	95.745	0	0	0	0	0	0	0	0	0	0	0	0	0	0	0	0	0	0	0
GCA_900039835.1	st1493	95.745	0	0	0	0	0	99.048	0	0	0	0	0	0	0	0	0	0	0	0	1
GCA_900039845.1	st1503	95.745	0	0	0	0	0	99.048	0	0	0	0	0	0	0	0	0	0	0	0	1
GCA_900039865.1	st1521	95.745	0	0	0	0	0	99.048	0	0	0	0	0	0	0	0	0	0	0	0	1
GCA_900039875.1	st1578	95.745	0	0	0	0	0	99.048	0	0	0	0	0	0	0	0	0	0	0	0	1
GCA_900039885.1	st1584	95.745	0	0	0	0	0	0	0	0	0	0	0	0	0	0	0	0	0	0	0
GCA_900039895.1	st1592	95.745	0	0	0	0	0	0	0	0	0	0	0	0	0	0	0	0	0	0	0
GCA_900039905.1	st1594	95.745	0	0	0	0	0	99.048	0	0	0	0	0	0	0	0	0	0	0	0	1
GCA_900039915.1	st1596	95.745	0	0	0	0	0	99.048	0	0	0	0	0	0	0	0	0	0	0	0	1
GCA_900039925.1	st1597	95.745	0	0	0	0	0	99.048	0	0	0	0	0	0	0	0	0	0	0	0	1
GCA_900039935.1	st1614	95.745	0	0	0	0	0	0	0	0	0	0	0	0	0	0	0	0	0	0	0
GCA_900039955.1	st1625	95.745	0	0	0	0	0	0	0	0	0	0	0	0	0	0	0	0	0	0	0
GCA_900039965.1	st1634	95.745	0	0	0	0	0	99.048	0	0	0	0	0	0	0	0	0	0	0	0	1
GCA_900040055.1	st2467	95.745	0	0	0	0	0	99.048	0	0	0	0	0	0	0	0	0	0	0	0	1
GCA_900040085.1	st617	95.745	0	0	0	0	0	99.048	0	0	0	0	0	0	0	0	0	0	0	0	1
GCA_900040115.1	st191	95.745	0	0	0	0	0	99.048	0	0	0	0	0	0	0	0	0	0	0	0	1
GCA_900040125.1	st972	95.745	0	0	0	0	0	0	0	0	0	0	0	0	0	0	0	0	0	0	0
GCA_900040135.1	st1209	95.745	0	0	0	0	0	99.048	0	0	0	0	0	0	0	0	0	0	0	0	1
GCA_900040145.1	st1233	95.745	0	0	0	0	0	0	0	0	0	0	0	0	0	0	0	0	0	0	0
GCA_900040175.1	st1334	95.626	0	0	0	0	0	0	0	0	0	0	0	0	0	0	0	0	0	0	0
GCA_900040185.1	st1346	95.745	0	0	0	0	0	99.048	0	0	0	0	0	0	0	0	0	0	0	0	1
GCA_900040195.1	st1360	95.745	0	0	0	0	0	0	0	0	0	0	0	0	0	0	0	0	0	0	0
GCA_900040205.1	st1362	95.745	0	0	0	0	0	99.048	0	0	0	0	0	0	0	0	0	0	0	0	1
GCA_900040215.1	st1366	95.745	0	0	0	0	0	99.048	0	0	0	0	0	0	0	0	0	0	0	0	1
GCA_900040225.1	st1364	95.745	0	0	0	0	0	99.048	0	0	0	0	0	0	0	0	0	0	0	0	1
GCA_900040235.1	st1380	95.745	0	0	0	0	0	0	0	0	0	0	0	0	0	0	0	0	0	0	0
GCA_900040255.1	st1395	95.745	0	0	0	0	0	99.048	0	0	0	0	0	0	0	0	0	0	0	0	1
GCA_900040265.1	st1396	95.745	0	0	0	0	0	99.048	0	0	0	0	0	0	0	0	0	0	0	0	1
GCA_900040285.1	st1405	95.745	0	0	0	0	0	0	0	0	0	0	0	0	0	0	0	0	0	0	0
GCA_900040295.1	st1442	95.745	0	0	0	0	0	0	0	0	0	0	0	0	0	0	0	0	0	0	0
GCA_900040325.1	st1489	95.745	0	0	0	0	0	99.048	0	0	0	0	0	0	0	0	0	0	0	0	1
GCA_900040335.1	st1484	95.745	0	0	0	0	0	0	0	0	0	0	0	0	0	0	0	0	0	0	0
GCA_900040345.1	st1525	95.745	0	0	0	0	0	0	0	0	0	0	0	0	0	0	0	0	0	0	0
GCA_900040365.1	st1583	95.626	0	0	0	0	0	0	0	0	0	0	0	0	0	0	0	0	0	0	0
GCA_900040375.1	st1603	95.745	0	0	0	0	0	99.048	0	0	0	0	0	0	0	0	0	0	0	0	1
GCA_900040385.1	st1649	95.745	0	0	0	0	0	99.048	0	0	0	0	0	0	0	0	0	0	0	0	1
GCA_900040415.1	st1179	95.745	0	0	0	0	0	99.048	0	0	0	0	0	0	100	0	0	0	0	0	2
GCA_900040425.1	st1251	95.745	0	0	0	0	0	99.048	0	0	0	0	0	0	0	0	0	0	0	0	1
GCA_900040435.1	st1299	95.745	0	0	0	0	0	99.048	0	0	0	0	0	0	0	0	0	0	0	0	1
GCA_900040445.1	st1620	95.745	0	0	0	0	0	0	0	0	0	0	0	0	0	0	0	0	0	0	0
GCA_900040465.1	st1738	95.626	0	0	0	0	0	0	0	0	0	0	0	0	0	0	0	0	0	0	0
GCA_900040475.1	st1750	95.745	0	0	0	0	0	99.048	0	0	0	0	0	0	0	0	0	0	0	0	1
GCA_900040485.1	st1778	95.745	0	0	0	0	0	0	0	0	0	0	0	0	0	0	0	0	0	0	0
GCA_900040495.1	st1804	95.745	0	0	0	0	0	99.048	0	0	0	0	0	0	0	0	0	0	0	0	1
GCA_900040505.1	st1857	95.745	0	0	0	0	0	0	0	0	0	0	0	0	0	0	0	0	0	0	0
GCA_900040515.1	st1891	95.745	0	0	0	0	0	0	0	0	0	0	0	0	0	0	0	0	0	0	0
GCA_900040525.1	st1899	95.745	0	0	0	0	0	0	0	0	0	0	0	0	0	0	0	0	0	0	0
GCA_900040535.1	st1924	95.745	0	0	0	0	0	99.048	0	0	0	0	0	0	0	0	0	0	0	0	1
GCA_900040545.1	st1927	95.745	0	0	0	0	0	99.048	0	0	0	0	0	0	0	0	0	0	0	0	1
GCA_900040555.1	st1966	95.745	0	0	0	0	0	99.048	0	0	0	0	0	0	0	0	0	0	0	0	1
GCA_900040575.1	st2040	95.745	0	0	0	0	0	99.048	0	0	0	0	0	0	0	0	0	0	0	0	1
GCA_900040585.1	st2014	95.745	0	0	0	0	0	99.048	0	0	0	0	0	0	0	0	0	0	0	0	1
GCA_900040595.1	st2063	95.745	0	0	0	0	0	99.048	0	0	0	0	0	0	0	0	0	0	0	0	1
GCA_900040605.1	st2109	95.745	0	0	0	0	0	99.048	0	0	0	0	0	0	0	0	0	0	0	0	1
GCA_900040695.1	st2575	95.745	0	0	0	0	0	99.048	0	0	0	0	0	0	0	0	0	0	0	0	1
GCA_900040735.1	st714	95.745	0	0	0	0	0	99.048	0	0	0	0	0	0	0	0	0	0	0	0	1
GCA_900040745.1	st752	95.745	0	0	0	0	0	99.048	0	0	0	0	0	0	0	0	0	0	0	0	1
GCA_900040755.1	st892	95.745	0	0	0	0	0	99.048	0	0	0	0	0	0	0	0	0	0	0	0	1
GCA_900040765.1	st1295	95.745	0	0	0	0	0	99.048	0	0	0	0	0	0	0	0	0	0	0	0	1
GCA_900040775.1	st1600	95.745	0	0	0	0	0	99.048	0	0	0	0	0	0	100	0	0	0	0	0	2
GCA_900040785.1	st1608	95.745	0	0	0	0	0	99.048	0	0	0	0	0	0	0	0	0	0	0	0	1
GCA_900040795.1	st1613	95.745	0	0	0	0	0	0	0	0	0	0	0	0	0	0	0	0	0	0	0
GCA_900040805.1	st1691	95.745	0	0	0	0	0	0	0	0	0	0	0	0	0	0	0	0	0	0	0
GCA_900040825.1	st83	95.745	0	0	0	0	0	99.048	0	0	0	0	0	0	0	0	0	0	0	0	1
GCA_900040845.1	st501	95.745	0	0	0	0	0	99.048	0	0	0	0	0	0	0	0	0	0	0	0	1
GCA_900040865.1	st577	95.745	0	0	0	0	0	99.048	0	0	0	0	0	0	0	0	0	0	0	0	1
GCA_900040875.1	st799	95.745	0	0	0	0	0	99.048	0	0	0	0	0	0	0	0	0	0	0	0	1
GCA_900040895.1	st907	95.745	0	0	0	0	0	99.048	0	0	0	0	0	0	0	0	0	0	0	0	1
GCA_900040905.1	st924	95.745	0	0	0	0	0	99.048	0	0	0	0	0	0	0	0	0	0	0	0	1
GCA_900040915.1	st930	95.745	0	0	0	0	0	99.048	0	0	0	0	0	0	0	0	0	0	0	0	1
GCA_900040925.1	st983	95.745	100	0	0	0	0	99.048	0	0	0	0	0	0	100	0	0	0	0	0	3
GCA_900040935.1	st1145	95.745	0	0	0	0	0	0	0	0	0	0	0	0	0	0	0	0	0	0	0
GCA_900040945.1	st1197	95.745	0	0	0	0	0	0	0	0	0	0	0	0	0	0	0	0	0	0	0
GCA_900040955.1	st1207	95.745	0	0	0	0	0	99.048	0	0	0	0	0	0	0	0	0	0	0	0	1
GCA_900040965.1	st1293	95.745	0	0	0	0	0	99.048	0	0	0	0	0	0	0	0	0	0	0	0	1
GCA_900040975.1	st1312	95.745	0	0	0	0	0	0	0	0	0	0	0	0	0	0	0	0	0	0	0
GCA_900040985.1	st1363	98.227	100	0	0	100	0	99.048	0	0	0	0	0	0	0	0	0	0	0	0	3
GCA_900041005.1	st1469	95.745	0	0	0	0	0	99.048	0	0	0	0	0	0	0	0	0	0	0	0	1
GCA_900041015.1	st1599	95.745	0	0	0	0	0	0	0	0	0	0	0	0	0	0	0	0	0	0	0
GCA_900041025.1	st1604	95.745	0	0	0	0	0	99.048	0	0	0	0	0	0	0	0	0	0	0	0	1
GCA_900041035.1	st1654	95.745	0	0	0	0	0	0	0	0	0	0	0	0	0	0	0	0	0	0	0
GCA_900041055.1	st1817	95.745	0	0	0	0	0	99.048	0	0	0	0	0	0	0	0	0	0	0	0	1
GCA_900041075.1	st1836	95.745	0	0	0	0	0	99.048	0	0	0	0	0	0	0	0	0	0	0	0	1
GCA_900041095.1	st1903	95.745	0	0	0	0	0	99.048	0	0	0	0	0	0	0	0	0	0	0	0	1
GCA_900041105.1	st1912	95.745	0	0	0	0	0	99.048	0	0	0	0	0	0	0	0	0	0	0	0	1
GCA_900041115.1	st1928	95.745	0	0	0	0	0	95.238	0	0	0	0	0	0	0	0	0	0	0	0	1
GCA_900041125.1	st1934	95.745	0	0	0	0	0	99.048	0	0	0	0	0	0	0	0	0	0	0	0	1
GCA_900041135.1	st1971	95.745	0	0	0	0	0	0	0	0	0	0	0	0	0	0	0	0	0	0	0
GCA_900041155.1	st2044	95.745	100	0	0	0	0	99.048	0	0	0	0	0	0	0	0	0	0	0	0	2
GCA_900041175.1	st2060	95.745	0	0	0	0	0	99.048	0	0	0	0	0	0	0	0	0	0	0	0	1
GCA_900041195.1	st2208	95.745	0	0	0	0	0	0	0	0	0	0	0	0	0	0	0	0	0	0	0
GCA_900041205.1	st2258	95.745	0	0	0	0	0	99.048	0	0	0	0	0	0	0	0	0	0	0	0	1
GCA_900041225.1	st2295	95.745	0	0	0	0	0	99.048	0	0	0	0	0	0	0	0	0	0	0	0	1
GCA_900041775.1	st313	95.745	0	0	0	0	0	99.048	0	0	0	0	0	0	0	0	0	0	0	0	1
GCA_900041795.1	st1638	95.745	0	0	0	0	0	99.048	0	0	0	0	0	0	0	0	0	0	0	0	1
GCA_900041815.1	st1659	95.745	0	0	0	0	0	99.048	0	0	0	0	0	0	0	0	0	0	0	0	1
GCA_900041825.1	st1665	95.745	0	0	0	0	0	99.048	0	0	0	0	0	0	0	0	0	0	0	0	1
GCA_900041835.1	st1667	95.745	0	0	0	0	0	99.048	0	0	0	0	0	0	0	0	0	0	0	0	1
GCA_900041855.1	st1689	95.745	0	0	0	0	0	99.048	0	0	0	0	0	0	0	0	0	0	0	0	1
GCA_900041865.1	st28	95.745	0	0	0	0	0	99.048	0	0	0	0	0	0	0	0	0	0	0	0	1
GCA_900041875.1	st97	95.745	0	0	0	0	0	99.048	0	0	0	0	0	0	0	0	0	0	0	0	1
GCA_900041905.1	st442	95.745	0	0	0	0	0	0	0	0	0	0	0	0	0	0	0	0	0	0	0
GCA_900041915.1	st519	95.745	0	0	0	0	0	0	0	0	0	0	0	0	0	0	0	0	0	0	0
GCA_900041925.1	st637	95.745	0	0	0	0	0	99.048	0	0	0	0	0	0	0	0	0	0	0	0	1
GCA_900041935.1	st664	95.745	0	0	0	0	0	99.048	0	0	0	0	0	0	100	0	0	0	0	0	2
GCA_900041945.1	st850	95.745	0	0	0	0	0	0	0	0	0	0	0	0	0	0	0	0	0	0	0
GCA_900041955.1	st880	95.745	0	0	0	0	0	0	0	0	0	0	0	0	0	0	0	0	0	0	0
GCA_900041975.1	st939	95.745	0	0	0	0	0	99.048	0	0	0	0	0	0	0	0	0	0	0	0	1
GCA_900041985.1	st945	95.745	0	0	0	0	0	0	0	0	0	0	0	0	0	0	0	0	0	0	0
GCA_900042005.1	st990	95.626	0	0	0	0	0	99.048	0	0	0	0	0	0	0	0	0	0	0	0	1
GCA_900042015.1	st1014	95.745	0	0	0	0	0	99.048	0	0	0	0	0	0	0	0	0	0	0	0	1
GCA_900042025.1	st1003	95.745	0	0	0	0	0	99.048	0	0	0	0	0	0	0	0	0	0	0	0	1
GCA_900042035.1	st1021	95.745	0	0	0	0	0	0	0	0	0	0	0	0	0	0	0	0	0	0	0
GCA_900042045.1	st1051	95.745	0	0	0	0	0	99.048	0	0	0	0	0	0	0	0	0	0	0	0	1
GCA_900042055.1	st1074	95.745	0	0	0	0	0	0	0	0	0	0	0	0	0	0	0	0	0	0	0
GCA_900042065.1	st1135	95.745	0	0	0	0	0	99.048	0	0	0	0	0	0	0	0	0	0	0	0	1
GCA_900042075.1	st1153	95.745	0	0	0	0	0	99.048	0	0	0	0	0	0	0	0	0	0	0	0	1
GCA_900042085.1	st1226	95.745	0	0	0	0	0	98.912	0	0	0	0	0	0	0	0	0	0	0	0	1
GCA_900042095.1	st1265	95.745	0	0	0	0	0	99.048	0	0	0	0	0	0	0	0	0	0	0	0	1
GCA_900042105.1	st1278	95.745	0	0	0	0	0	99.048	0	0	0	0	0	0	99.565	0	0	0	0	0	2
GCA_900042115.1	st1284	95.745	0	0	0	0	0	99.048	0	0	0	0	0	0	0	0	0	0	0	0	1
GCA_900042165.1	st1403	95.745	0	0	0	0	0	0	0	0	0	0	0	0	0	0	0	0	0	0	0
GCA_900042175.1	st1439	95.745	0	0	0	0	0	99.048	0	0	0	0	0	0	0	0	0	0	0	0	1
GCA_900042185.1	st1447	95.745	0	0	0	0	0	0	0	0	0	0	0	0	0	0	0	0	0	0	0
GCA_900042195.1	st1451	95.745	0	0	0	0	0	99.048	0	0	0	0	0	0	0	0	0	0	0	0	1
GCA_900042205.1	st1522	95.745	0	0	0	0	0	0	0	0	0	0	0	0	0	0	0	0	0	0	0
GCA_900042215.1	st1526	95.745	0	0	0	0	0	99.048	0	0	0	0	0	0	0	0	0	0	0	0	1
GCA_900042225.1	st1542	95.745	0	0	0	0	0	0	0	0	0	0	0	0	0	0	0	0	0	0	0
GCA_900042235.1	st1553	98.227	0	0	0	0	0	99.048	0	0	0	0	0	0	0	0	0	0	0	0	1
GCA_900042245.1	st1671	95.745	0	0	0	0	0	0	0	0	0	0	0	0	0	0	0	0	0	0	0
GCA_900042265.1	st1696	95.745	0	0	0	0	0	0	0	0	0	0	0	0	0	0	0	0	0	0	0
GCA_900042275.1	st1699	95.745	0	0	0	0	0	99.048	0	0	0	0	0	0	0	0	0	0	0	0	1
GCA_900042285.1	st1703	95.745	0	0	0	0	0	99.048	0	0	0	0	0	0	0	0	0	0	0	0	1
GCA_900042295.1	st1707	95.745	0	0	0	0	0	99.048	0	0	0	0	0	0	0	0	0	0	0	0	1
GCA_900042305.1	st1711	95.745	0	0	0	0	0	99.048	0	0	0	0	0	0	0	0	0	0	0	0	1
GCA_900042315.1	st1717	95.745	0	0	0	0	0	0	0	0	0	0	0	0	0	0	0	0	0	0	0
GCA_900042475.1	st255	95.745	0	0	0	0	0	99.048	0	0	0	0	0	0	0	0	0	0	0	0	1
GCA_900042485.1	st585	95.745	0	0	0	0	0	0	0	0	0	0	0	0	0	0	0	0	0	0	0
GCA_900042505.1	st902	95.745	0	0	0	0	0	0	0	0	0	0	0	0	0	0	0	0	0	0	0
GCA_900042525.1	st2148	95.745	0	0	0	0	0	99.048	0	0	0	0	0	0	0	0	0	0	0	0	1
GCA_900042535.1	st2154	95.745	0	0	0	0	0	99.048	0	0	0	0	0	0	0	0	0	0	0	0	1
GCA_900042545.1	st2175	95.745	0	0	0	0	0	99.048	0	0	0	0	0	0	0	0	0	0	0	0	1
GCA_900042555.1	st2182	95.745	0	0	0	0	0	0	0	0	0	0	0	0	0	0	0	0	0	0	0
GCA_900042565.1	st2195	95.745	0	0	0	0	0	98.941	0	0	0	0	0	0	0	0	0	0	0	0	1
GCA_900042575.1	st2196	95.745	0	0	0	0	0	99.048	0	0	0	0	0	0	0	0	0	0	0	0	1
GCA_900042585.1	st2198	95.745	0	0	0	0	0	99.048	0	0	0	0	0	0	0	0	0	0	0	0	1
GCA_900042595.1	st2200	95.745	0	0	0	0	0	99.048	0	0	0	0	0	0	0	0	0	0	0	0	1
GCA_900042605.1	st2203	95.745	0	0	0	0	0	99.048	0	0	0	0	0	0	0	0	0	0	0	0	1
GCA_900042615.1	st2205	95.745	0	0	0	0	0	0	0	0	0	0	0	0	0	0	0	0	0	0	0
GCA_900042635.1	st2260	95.745	0	0	0	0	0	99.048	0	0	0	0	0	0	0	0	0	0	0	0	1
GCA_900042645.1	st2269	95.745	0	0	0	0	0	99.048	0	0	0	0	0	0	0	0	0	0	0	0	1
GCA_900042665.1	st2299	95.745	0	0	0	0	0	99.048	0	0	0	0	0	0	0	0	0	0	0	0	1
GCA_900042675.1	st2315	95.745	0	0	0	0	0	0	0	0	0	0	0	0	0	0	0	0	0	0	0
GCA_900042685.1	st2329	95.745	0	0	0	0	0	99.048	0	0	0	0	0	0	0	0	0	0	0	0	1
GCA_900042695.1	st2334	95.745	0	0	0	0	0	0	0	0	0	0	0	0	0	0	0	0	0	0	0
GCA_900042715.1	st2349	95.745	0	0	0	0	0	0	0	0	0	0	0	0	0	0	0	0	0	0	0
GCA_900042735.1	st2218	95.745	0	0	0	0	0	99.048	0	0	0	0	0	0	0	0	0	0	0	0	1
GCA_900043545.1	st2427	95.745	0	0	0	0	0	0	0	0	0	0	0	0	0	0	0	0	0	0	0
GCA_900043555.1	st2729	95.745	0	0	0	0	0	99.048	0	0	0	0	0	0	0	0	0	0	0	0	1
GCA_900043585.1	st3102	95.745	100	0	0	0	0	99.048	0	0	0	0	0	0	0	0	0	0	0	0	2
GCA_900043595.1	st2402	95.745	0	0	0	0	0	0	0	0	0	0	0	0	0	0	0	0	0	0	0
GCA_900043605.1	st2889	95.626	0	0	0	0	0	0	0	0	0	0	0	0	0	0	0	0	0	0	0
GCA_900043615.1	st3257	99.9	0	0	0	0	0	99.048	0	0	0	0	0	0	0	0	0	0	0	0	1
GCA_900043645.1	st856	95.745	0	0	0	0	0	99.048	0	0	0	0	0	0	0	0	0	0	0	0	1
GCA_900043885.1	st133	95.745	0	0	0	0	0	0	0	0	0	0	0	0	0	0	0	0	0	0	0
GCA_900043895.1	st86	95.745	0	0	0	0	0	99.048	0	0	0	0	0	0	0	0	0	0	0	0	1
GCA_900043905.1	st81	95.745	0	0	0	0	0	0	0	0	0	0	0	0	0	0	0	0	0	0	0
GCA_900043925.1	st107	95.745	0	0	0	0	0	99.048	0	0	0	0	0	0	0	0	0	0	0	0	1
GCA_900043935.1	st10	95.745	0	0	0	0	0	99.048	0	0	0	0	0	0	0	0	0	0	0	0	1
GCA_900043955.1	st118	95.745	0	0	0	0	0	99.048	0	0	0	0	0	0	0	0	0	0	0	0	1
GCA_900044095.1	st1818	95.745	0	0	0	0	0	99.048	0	0	0	0	0	0	0	0	0	0	0	0	1
GCA_900044325.1	st3287	95.745	0	0	0	0	0	0	0	0	0	0	0	0	0	0	0	0	0	0	0
GCA_900044355.1	st146	95.745	0	0	0	0	0	0	0	0	0	0	0	0	0	0	0	0	0	0	0
GCA_900044365.1	st94	95.745	0	0	0	0	0	99.048	0	0	0	0	0	0	0	0	0	0	0	0	1
GCA_900044375.1	st89	95.745	0	0	0	0	0	99.048	0	0	0	0	0	0	0	0	0	0	0	0	1
GCA_900044385.1	st44	95.745	0	0	0	0	0	0	0	0	0	0	0	0	0	0	0	0	0	0	0
GCA_900044395.1	st12	95.745	0	0	0	0	0	99.048	0	0	0	0	0	0	0	0	0	0	0	0	1
GCA_900044415.1	st30	95.745	0	0	0	0	0	0	0	0	0	0	0	0	0	0	0	0	0	0	0
GCA_900044425.1	st102	95.745	0	0	0	0	0	0	0	0	0	0	0	0	0	0	0	0	0	0	0
GCA_900044445.1	st62	95.745	0	0	0	0	0	99.048	0	0	0	0	0	0	0	0	0	0	0	0	1
GCA_900044455.1	st321	95.745	0	0	0	0	0	0	0	0	0	0	0	0	0	0	0	0	0	0	0
GCA_900044465.1	st470	95.745	0	0	0	0	0	99.048	0	0	0	0	0	0	0	0	0	0	0	0	1
GCA_900044475.1	st631	95.745	0	0	0	0	0	99.048	0	0	0	0	0	0	0	0	0	0	0	0	1
GCA_900044485.1	st633	95.745	0	0	0	0	0	99.048	0	0	0	0	0	0	0	0	0	0	0	0	1
GCA_900044505.1	st778	95.745	0	0	0	0	0	99.048	0	0	0	0	0	0	0	0	0	0	0	0	1
GCA_900044525.1	st1230	95.745	0	0	0	0	0	99.048	0	0	0	0	0	0	0	0	0	0	0	0	1
GCA_900044545.1	st1464	95.745	0	0	0	0	0	99.048	0	0	0	0	0	0	0	0	0	0	0	0	1
GCA_900044555.1	st1482	95.745	0	0	0	0	0	0	0	0	0	0	0	0	0	0	0	0	0	0	0
GCA_900044575.1	st1500	95.745	0	0	0	0	0	99.048	0	0	0	0	0	0	0	0	0	0	0	0	1
GCA_900044595.1	st2224	95.745	0	0	0	0	0	99.048	0	0	0	0	0	0	0	0	0	0	0	0	1
GCA_900044605.1	st2230	95.745	0	0	0	0	0	99.048	0	0	0	0	0	0	0	0	0	0	0	0	1
GCA_900044625.1	st2252	95.745	0	0	0	0	0	0	0	0	0	0	0	0	0	0	0	0	0	0	0
GCA_900044635.1	st2251	95.745	0	0	0	0	0	99.048	0	0	0	0	0	0	0	0	0	0	0	0	1
GCA_900044785.1	st2057	95.745	0	0	0	0	0	99.048	0	0	0	0	0	0	0	0	0	0	0	0	1
GCA_900044795.1	st2189	95.745	0	0	0	0	0	99.048	0	0	0	0	0	0	0	0	0	0	0	0	1
GCA_900044895.1	st292	95.745	0	0	0	0	0	99.048	0	0	0	0	0	0	0	0	0	0	0	0	1
GCA_900044905.1	st456	95.745	0	0	0	0	0	99.048	0	0	0	0	0	0	0	0	0	0	0	0	1
GCA_900044915.1	st462	95.745	0	0	0	0	0	99.048	0	0	0	0	0	0	0	0	0	0	0	0	1
GCA_900044935.1	st781	95.745	0	0	0	0	0	99.048	0	0	0	0	0	0	0	0	0	0	0	0	1
GCA_900044945.1	st804	95.745	0	0	0	0	0	99.048	0	0	0	0	0	0	0	0	0	0	0	0	1
GCA_900044955.1	st816	95.745	0	0	0	0	0	99.048	0	0	0	0	0	0	0	0	0	0	0	0	1
GCA_900044965.1	st223	95.745	0	0	0	0	0	99.048	0	0	0	0	0	0	0	0	0	0	0	0	1
GCA_900044975.1	st593	95.745	0	0	0	0	0	99.048	0	0	0	0	0	0	0	0	0	0	0	0	1
GCA_900044985.1	st621	95.745	0	0	0	0	0	99.048	0	0	0	0	0	0	0	0	0	0	0	0	1
GCA_900044995.1	st630	95.745	0	0	0	0	0	99.048	0	0	0	0	0	0	0	0	0	0	0	0	1
GCA_900045005.1	st649	95.745	0	0	0	0	0	99.048	0	0	0	0	0	0	0	0	0	0	0	0	1
GCA_900045015.1	st953	95.745	0	0	0	0	0	99.048	0	0	0	0	0	0	0	0	0	0	0	0	1
GCA_900045025.1	st1122	95.745	0	0	0	0	0	99.048	0	0	0	0	0	0	0	0	0	0	0	0	1
GCA_900045035.1	st1127	95.745	0	0	0	0	0	99.048	0	0	0	0	0	0	0	0	0	0	0	0	1
GCA_900045045.1	st1136	95.745	100	0	0	0	0	99.048	0	0	0	0	0	0	0	0	0	0	0	0	2
GCA_900045055.1	st1139	95.745	0	0	0	0	0	99.048	0	0	0	0	0	0	0	0	0	0	0	0	1
GCA_900045065.1	st1476	95.745	0	0	0	0	0	98.912	0	0	0	0	0	0	0	0	0	0	0	0	1
GCA_900045075.1	st1655	95.745	0	0	0	0	0	99.048	0	0	0	0	0	0	0	0	0	0	0	0	1
GCA_900045095.1	st139	95.745	0	0	0	0	0	99.048	0	0	0	0	0	0	0	0	0	0	0	0	1
GCA_900045105.1	st212	95.745	0	0	0	0	0	99.048	0	0	0	0	0	0	0	0	0	0	0	0	1
GCA_900045135.1	st1581	95.745	0	0	0	0	0	0	0	0	0	0	0	0	0	0	0	0	0	0	0
GCA_900045155.1	st1932	95.745	0	0	0	0	0	99.048	0	0	0	0	0	0	0	0	0	0	0	0	1
GCA_900045165.1	st2396	95.745	0	0	0	0	0	99.048	0	0	0	0	0	0	0	0	0	0	0	0	1
GCA_900045175.1	st2445	95.626	0	0	0	0	0	98.912	0	0	0	0	0	0	0	0	0	0	0	0	1
GCA_900045185.1	st2533	95.745	100	0	0	0	0	99.048	0	0	0	0	0	0	0	0	0	0	0	0	2
GCA_900045195.1	st2540	95.745	99.93	0	0	0	0	99.048	0	0	0	0	0	0	0	0	0	0	0	0	2
GCA_900045205.1	st2550	95.745	0	0	0	0	0	0	0	0	97.932	0	0	0	0	0	0	0	0	0	1
GCA_900045215.1	st2574	95.745	0	0	0	0	0	99.048	0	0	0	0	0	0	0	0	0	0	0	0	1
GCA_900045225.1	st2591	95.863	0	0	0	0	0	0	0	0	0	0	0	0	100	0	0	0	0	0	1
GCA_900045245.1	st2604	95.745	0	0	0	0	0	0	0	0	0	0	0	0	99.928	0	0	0	0	0	1
GCA_900045255.1	st2639	95.745	0	0	0	0	0	99.048	0	0	0	0	0	0	0	0	0	0	0	0	1
GCA_900045265.1	st2613	95.745	0	0	0	0	0	99.048	0	0	0	0	0	0	0	0	0	0	0	0	1
GCA_900045475.1	st2954	95.745	0	0	0	0	0	0	0	0	0	0	0	0	0	0	0	0	0	0	0
GCA_900045495.1	st120	95.745	0	0	0	0	0	99.048	0	0	0	0	0	0	0	0	0	0	0	0	1
GCA_900045525.1	st88	95.745	0	0	0	0	0	99.048	0	0	0	0	0	0	0	0	0	0	0	0	1
GCA_900045545.1	st75	95.745	0	0	0	0	0	99.048	0	0	0	0	0	0	0	0	0	0	0	0	1
GCA_900045555.1	st144	95.745	0	0	0	0	0	99.048	0	0	0	0	0	0	0	0	0	0	0	0	1
GCA_900045575.1	st101	95.745	0	0	0	0	0	99.048	0	0	0	0	0	0	0	0	0	0	0	0	1
GCA_900045605.1	st134	95.745	0	0	0	0	0	99.099	0	0	0	0	0	0	0	0	0	0	0	0	1
GCA_900045655.1	st214	95.745	0	0	0	0	0	0	0	0	0	0	0	0	0	0	0	0	0	0	0
GCA_900045665.1	st219	95.745	0	0	0	0	0	99.048	0	0	0	0	0	0	0	0	0	0	0	0	1
GCA_900045675.1	st254	95.745	0	0	0	0	0	99.048	0	0	0	0	0	0	0	0	0	0	0	0	1
GCA_900045715.1	st302	95.745	0	0	0	0	0	0	0	0	0	0	0	0	0	0	0	0	0	0	0
GCA_900045735.1	st325	95.626	0	0	0	0	0	99.048	0	0	0	0	0	0	0	0	0	0	0	0	1
GCA_900045745.1	st330	95.745	0	0	0	0	0	99.048	0	0	0	0	0	0	0	0	0	0	0	0	1
GCA_900045755.1	st349	95.745	0	0	0	0	0	98.805	0	0	0	0	0	0	0	0	0	0	0	0	1
GCA_900045775.1	st430	95.745	0	0	0	0	0	99.048	0	0	0	0	0	0	0	0	0	0	0	0	1
GCA_900045805.1	st490	95.745	0	0	0	0	0	99.048	0	0	0	0	0	0	0	0	0	0	0	0	1
GCA_900045935.1	st838	95.745	0	0	0	0	0	99.048	0	0	0	0	0	0	0	0	0	0	0	0	1
GCA_900045945.1	st341	95.745	0	0	0	0	0	0	0	0	0	0	0	0	0	0	0	0	0	0	0
GCA_900045955.1	st475	95.745	0	0	0	0	0	99.048	0	0	0	0	0	0	0	0	0	0	0	0	1
GCA_900045965.1	st478	95.745	0	0	0	0	0	99.048	0	0	0	0	0	0	0	0	0	0	0	0	1
GCA_900046015.1	st1511	95.745	0	0	0	0	0	0	0	0	0	0	0	0	0	0	0	0	0	0	0
GCA_900046045.1	st340	95.745	0	0	0	0	0	99.048	0	0	0	0	0	0	0	0	0	0	0	0	1
GCA_900046065.1	st1171	95.745	0	0	0	0	0	0	0	0	0	0	0	0	0	0	0	0	0	0	0
GCA_900046075.1	st1723	95.745	0	0	0	0	0	99.048	0	0	0	0	0	0	0	0	0	0	0	0	1
GCA_900046085.1	st1729	95.745	0	0	0	0	0	0	0	0	0	0	0	0	0	0	0	0	0	0	0
GCA_900046095.1	st1735	95.745	0	0	0	0	0	0	0	0	0	0	0	0	0	0	0	0	0	0	0
GCA_900046105.1	st1745	95.745	0	0	0	0	0	99.048	0	0	0	0	0	0	0	0	0	0	0	0	1
GCA_900046115.1	st1742	95.745	0	0	0	0	0	99.048	0	0	0	0	0	0	100	0	0	0	0	0	2
GCA_900046125.1	st1775	95.745	0	0	0	0	0	99.048	0	0	0	0	0	0	0	0	0	0	0	0	1
GCA_900046135.1	st1793	95.745	0	0	0	0	0	0	0	0	0	0	0	0	0	0	0	0	0	0	0
GCA_900046155.1	st1798	95.745	0	0	0	0	0	99.048	0	0	0	0	0	0	0	0	0	0	0	0	1
GCA_900046165.1	st1799	95.745	0	0	0	0	0	99.048	0	0	0	0	0	0	0	0	0	0	0	0	1
GCA_900046175.1	st1803	95.745	0	0	0	0	0	99.048	0	0	0	0	0	0	0	0	0	0	0	0	1
GCA_900046185.1	st1820	95.745	0	0	0	0	0	0	0	0	0	0	0	0	0	0	0	0	0	0	0
GCA_900046225.1	st1921	95.745	0	0	0	0	0	99.048	0	0	0	0	0	0	0	0	0	0	0	0	1
GCA_900046235.1	st1941	95.745	0	0	0	0	0	0	0	0	0	0	0	0	0	0	0	0	0	0	0
GCA_900046245.1	st1942	95.745	0	0	0	0	0	0	0	0	0	0	0	0	0	0	0	0	0	0	0
GCA_900046255.1	st1956	95.745	0	0	0	0	0	0	0	0	0	0	0	0	0	0	0	0	0	0	0
GCA_900046265.1	st1961	95.745	0	0	0	0	0	99.048	0	0	0	0	0	0	0	0	0	0	0	0	1
GCA_900046275.1	st1989	95.745	0	0	0	0	0	99.048	0	0	0	0	0	0	0	0	0	0	0	0	1
GCA_900046315.1	st2072	95.745	0	0	0	0	0	99.048	0	0	0	0	0	0	0	0	0	0	0	0	1
GCA_900046335.1	st2078	95.745	0	0	0	0	0	99.048	0	0	0	0	0	0	0	0	0	0	0	0	1
GCA_900046345.1	st2110	95.745	0	0	0	0	0	99.048	0	0	0	0	0	0	0	0	0	0	0	0	1
GCA_900046355.1	st2121	95.745	0	0	0	0	0	99.048	0	0	0	0	0	0	0	0	0	0	0	0	1
GCA_900046385.1	st2151	95.745	0	0	0	0	0	0	0	0	0	0	0	0	0	0	0	0	0	0	0
GCA_900046395.1	st2174	95.745	0	0	0	0	0	99.048	0	0	0	0	0	0	0	0	0	0	0	0	1
GCA_900046405.1	st2187	95.745	0	0	0	0	0	0	0	0	0	0	0	0	0	0	0	0	0	0	0
GCA_900046795.1	st2372	95.745	0	0	0	0	0	0	0	0	0	0	0	0	0	0	0	0	0	0	0
GCA_900046835.1	st346	95.745	0	0	0	0	0	0	0	0	0	0	0	0	0	0	0	0	0	0	0
GCA_900046845.1	st674	95.745	0	0	0	0	0	99.048	0	0	0	0	0	0	0	0	0	0	0	0	1
GCA_900046855.1	st530	95.745	0	0	0	0	0	0	0	0	0	0	0	0	0	0	0	0	0	0	0
GCA_900046885.1	st1113	95.745	0	0	0	0	0	0	0	0	0	0	0	0	0	0	0	0	0	0	0
GCA_900047135.1	st955	95.745	0	0	0	0	0	0	0	0	0	0	0	0	0	0	0	0	0	0	0
GCA_900047155.1	st284	95.745	0	0	0	0	0	0	0	0	0	0	0	0	0	0	0	0	0	0	0
GCA_900047185.1	st533	95.745	0	0	0	0	0	99.048	0	0	0	0	0	0	0	0	0	0	0	0	1
GCA_900047205.1	st544	95.745	0	0	0	0	0	99.048	0	0	0	0	0	0	0	0	0	0	0	0	1
GCA_900047215.1	st543	95.745	0	0	0	0	0	99.048	0	0	0	0	0	0	0	0	0	0	0	0	1
GCA_900047235.1	st575	95.745	0	0	0	0	0	99.048	0	0	0	0	0	0	0	0	0	0	0	0	1
GCA_900047245.1	st580	95.745	0	0	0	0	0	99.048	0	0	0	0	0	0	0	0	0	0	0	0	1
GCA_900047255.1	st592	95.745	0	0	0	0	0	0	0	0	0	0	0	0	0	0	0	0	0	0	0
GCA_900047275.1	st614	95.745	0	0	0	0	0	0	0	0	0	0	0	0	0	0	0	0	0	0	0
GCA_900047285.1	st660	95.745	0	0	0	0	0	99.048	0	0	0	0	0	0	0	0	0	0	0	0	1
GCA_900047295.1	st661	95.745	0	0	0	0	0	0	0	0	0	0	0	0	0	0	0	0	0	0	0
GCA_900047305.1	st672	95.745	0	0	0	0	0	99.048	0	0	0	0	0	0	0	0	0	0	0	0	1
GCA_900047335.1	st695	95.745	0	0	0	0	0	0	0	0	0	0	0	0	0	0	0	0	0	0	0
GCA_900047345.1	st704	95.745	0	0	0	0	0	99.048	0	0	0	0	0	0	0	0	0	0	0	0	1
GCA_900047355.1	st706	95.745	0	0	0	0	0	99.048	0	0	0	0	0	0	0	0	0	0	0	0	1
GCA_900047365.1	st716	95.745	0	0	0	0	0	99.048	0	0	0	0	0	0	0	0	0	0	0	0	1
GCA_900047375.1	st731	95.745	0	0	0	0	0	99.048	0	0	0	0	0	0	0	0	0	0	0	0	1
GCA_900047395.1	st763	95.745	0	0	0	0	0	99.048	0	0	0	0	0	0	0	0	0	0	0	0	1
GCA_900047405.1	st798	95.745	0	0	0	0	0	99.048	0	0	0	0	0	0	0	0	0	0	0	0	1
GCA_900047415.1	st803	95.745	0	0	0	0	0	99.048	0	0	0	0	0	0	0	0	0	0	0	0	1
GCA_900047425.1	st793	95.745	0	0	0	0	0	99.048	0	0	0	0	0	0	0	0	0	0	0	0	1
GCA_900047445.1	st40	95.745	0	0	0	0	0	0	0	0	0	0	0	0	0	0	0	0	0	0	0
GCA_900047465.1	st72	95.745	0	0	0	0	0	99.048	0	0	0	0	0	0	0	0	0	0	0	0	1
GCA_900047475.1	st87	95.745	0	0	0	0	0	0	0	0	0	0	0	0	0	0	0	0	0	0	0
GCA_900047495.1	st128	95.745	0	0	0	0	0	99.048	0	0	0	0	0	0	0	0	0	0	0	0	1
GCA_900047515.1	st328	95.745	0	0	0	0	0	99.048	0	0	0	0	0	0	0	0	0	0	0	0	1
GCA_900048085.1	st2492	95.745	0	0	0	0	0	99.048	0	0	0	0	0	0	0	0	0	0	0	0	1
GCA_900048095.1	st845	95.745	0	0	0	0	0	99.048	0	0	0	0	0	0	0	0	0	0	0	0	1
GCA_900048155.1	st504	95.745	0	0	0	0	0	99.048	0	0	0	0	0	0	0	0	0	0	0	0	1
GCA_900048165.1	st508	95.745	0	0	0	0	0	99.048	0	0	0	0	0	0	0	0	0	0	0	0	1
GCA_900048175.1	st876	95.745	100	0	0	0	0	99.048	0	0	0	0	0	0	0	0	0	0	0	0	2
GCA_900048205.1	st2313	95.745	0	0	0	0	0	99.048	0	0	0	0	0	0	0	0	0	0	0	0	1
GCA_900048215.1	st2380	95.745	0	0	0	0	0	99.048	0	0	0	0	0	0	0	0	0	0	0	0	1
GCA_900048225.1	st2388	95.745	0	0	0	0	0	0	0	0	0	0	0	0	0	0	0	0	0	0	0
GCA_900048245.1	st2406	95.745	0	0	0	0	0	0	0	0	0	0	0	0	0	0	0	0	0	0	0
GCA_900048255.1	st2408	95.626	0	0	0	0	0	99.048	0	0	0	0	0	0	0	0	0	0	0	0	1
GCA_900048265.1	st2412	95.745	0	0	0	0	0	0	0	0	0	0	0	0	0	0	0	0	0	0	0
GCA_900048275.1	st2414	95.745	0	0	0	0	0	99.048	0	0	0	0	0	0	0	0	0	0	0	0	1
GCA_900048285.1	st2420	95.745	0	0	0	0	0	0	0	0	0	0	0	0	0	0	0	0	0	0	0
GCA_900048295.1	st2431	95.745	0	0	0	0	0	99.048	0	0	0	0	0	0	0	0	0	0	0	0	1
GCA_900048305.1	st2424	95.745	0	0	0	0	0	99.048	0	0	0	0	0	0	0	0	0	0	0	0	1
GCA_900048325.1	st2451	95.745	0	0	0	0	0	99.048	0	0	0	0	0	0	0	0	0	0	0	0	1
GCA_900048335.1	st2457	95.745	0	0	0	0	0	0	0	0	0	0	0	0	0	0	0	0	0	0	0
GCA_900048345.1	st2465	95.863	0	0	0	0	0	0	0	0	0	0	0	0	0	0	0	0	0	0	0
GCA_900048355.1	st2468	95.745	0	0	0	0	0	99.048	0	0	0	0	0	0	0	0	0	0	0	0	1
GCA_900048375.1	st2476	95.745	0	0	0	0	0	99.048	0	0	0	0	0	0	0	0	0	0	0	0	1
GCA_900048385.1	st2477	95.745	0	0	0	0	0	99.048	0	0	0	0	0	0	0	0	0	0	0	0	1
GCA_900048395.1	st2484	95.745	0	0	0	0	0	99.048	0	0	0	0	0	0	0	0	0	0	0	0	1
GCA_900048405.1	st2491	95.745	0	0	0	0	0	99.048	0	0	0	0	0	0	0	0	0	0	0	0	1
GCA_900048445.1	st403	95.745	0	0	0	0	0	99.048	0	0	0	0	0	0	0	0	0	0	0	0	1
GCA_900048475.1	st350	95.745	0	0	0	0	0	99.048	0	0	0	0	0	0	0	0	0	0	0	0	1
GCA_900048485.1	st390	95.745	0	0	0	0	0	99.048	0	0	0	0	0	0	0	0	0	0	0	0	1
GCA_900048495.1	st479	95.745	0	0	0	0	0	0	0	0	0	0	0	0	0	0	0	0	0	0	0
GCA_900048525.1	st572	95.745	0	0	0	0	0	99.048	0	0	0	0	0	0	0	0	0	0	0	0	1
GCA_900048535.1	st732	95.745	0	0	0	0	0	99.048	0	0	0	0	0	0	0	0	0	0	0	0	1
GCA_900048545.1	st764	95.745	100	0	0	0	0	99.048	0	0	0	0	0	0	0	0	0	0	0	0	2
GCA_900048555.1	st769	95.745	0	0	0	0	0	99.048	0	0	0	0	0	0	0	0	0	0	0	0	1
GCA_900048565.1	st779	95.745	0	0	0	0	0	99.048	0	0	0	0	0	0	0	0	0	0	0	0	1
GCA_900048575.1	st792	95.745	0	0	0	0	0	99.048	0	0	0	0	0	0	0	0	0	0	0	0	1
GCA_900048585.1	st805	95.745	0	0	0	0	0	99.048	0	0	0	0	0	0	0	0	0	0	0	0	1
GCA_900048595.1	st812	95.745	0	0	0	0	0	0	0	0	0	0	0	0	0	0	0	0	0	0	0
GCA_900048605.1	st832	95.745	0	0	0	0	0	0	0	0	0	0	0	0	0	0	0	0	0	0	0
GCA_900048615.1	st849	95.745	0	0	0	0	0	99.048	0	0	0	0	0	0	0	0	0	0	0	0	1
GCA_900048635.1	st894	95.745	0	0	0	0	0	99.048	0	0	0	0	0	0	0	0	0	0	0	0	1
GCA_900048645.1	st903	95.745	0	0	0	0	0	0	0	0	0	0	0	0	0	0	0	0	0	0	0
GCA_900048665.1	st908	95.745	0	0	0	0	0	0	0	0	0	0	0	0	0	0	0	0	0	0	0
GCA_900048675.1	st921	95.745	0	0	0	0	0	99.048	0	0	0	0	0	0	0	0	0	0	0	0	1
GCA_900048695.1	st927	95.745	0	0	0	0	0	99.048	0	0	0	0	0	0	0	0	0	0	0	0	1
GCA_900048705.1	st932	95.745	0	0	0	0	0	0	0	0	0	0	0	0	0	0	0	0	0	0	0
GCA_900048715.1	st931	95.745	0	0	0	0	0	99.048	0	0	0	0	0	0	0	0	0	0	0	0	1
GCA_900048725.1	st937	95.745	0	0	0	0	0	0	0	0	0	0	0	0	97.708	0	0	0	0	0	1
GCA_900048745.1	st960	95.745	0	0	0	100	0	0	0	0	0	0	0	0	0	0	0	0	0	0	1
GCA_900048755.1	st1246	95.745	0	0	0	0	0	99.048	0	0	0	0	0	0	0	0	0	0	0	0	1
GCA_900048765.1	st1308	95.745	0	0	0	0	0	98.095	0	0	0	0	0	0	0	0	0	0	0	0	1
GCA_900048775.1	st1444	95.745	0	0	0	0	0	99.048	0	0	0	0	0	0	0	0	0	0	0	0	1
GCA_900048785.1	st1495	95.745	0	0	0	0	0	99.048	0	0	0	0	0	0	0	0	0	0	0	0	1
GCA_900049315.1	st2548	95.745	100	0	0	0	0	99.048	0	0	0	0	0	0	0	0	0	0	0	0	2
GCA_900049325.1	st2570	95.745	0	0	0	0	0	99.048	0	0	0	0	0	0	0	0	0	0	0	0	1
GCA_900049385.1	st1188	95.745	0	0	0	0	0	99.048	0	0	0	0	0	0	0	0	0	0	0	0	1
GCA_900049395.1	st1390	95.745	0	0	0	0	0	99.048	0	0	0	0	0	0	0	0	0	0	0	0	1
GCA_900049405.1	st2254	95.745	0	0	0	0	0	99.048	0	0	0	0	0	0	0	0	0	0	0	0	1
GCA_900049415.1	st2282	95.626	0	0	0	0	0	0	0	0	0	0	0	0	0	0	0	0	0	0	0
GCA_900049425.1	st2527	95.745	0	0	0	0	0	99.048	0	0	100	0	0	0	0	0	0	0	0	0	2
GCA_900049435.1	st3116	95.745	0	0	0	0	0	0	0	0	0	0	0	0	0	0	0	0	0	0	0
GCA_900049445.1	st3218	95.745	0	0	0	0	0	99.048	0	0	0	0	0	0	0	0	0	0	0	0	1
GCA_900049455.1	st3199	95.745	0	0	0	0	0	99.048	0	0	0	0	0	0	0	0	0	0	0	0	1
GCA_900049765.1	st2731	95.745	0	0	0	0	0	0	0	0	0	0	0	0	100	0	0	0	0	0	1
GCA_900049775.1	st2923	95.745	0	0	0	0	0	99.048	0	0	0	0	0	0	0	0	0	0	0	0	1
GCA_900049785.1	st996	95.745	0	0	0	0	0	99.048	0	0	0	0	0	0	0	0	0	0	0	0	1
GCA_900049795.1	st1271	95.745	0	0	0	0	0	99.048	0	0	0	0	0	0	0	0	0	0	0	0	1
GCA_900049805.1	st2296	95.745	0	0	0	0	0	99.048	0	0	0	0	0	0	0	0	0	0	0	0	1
GCA_900049815.1	st3279	95.745	0	0	0	0	0	0	0	0	0	0	0	0	0	0	0	0	0	0	0
GCA_900050265.1	st1213	95.745	0	0	0	0	0	99.048	0	0	0	0	0	0	0	0	0	0	0	0	1
GCA_900050275.1	st1712	95.745	0	0	0	0	0	99.048	0	0	0	0	0	0	0	0	0	0	0	0	1
GCA_900050285.1	st1898	95.745	0	0	0	0	0	0	0	0	0	0	0	0	0	0	0	0	0	0	0
GCA_900050575.1	st2785	95.745	0	0	0	0	0	99.04	0	0	0	0	0	0	0	0	0	0	0	0	1
GCA_900050595.1	st3095	95.745	0	0	0	0	0	99.048	0	0	0	0	0	0	0	0	0	0	0	0	1
GCA_900050605.1	st3142	95.745	0	0	0	0	0	99.048	0	0	0	0	0	0	0	0	0	0	0	0	1
GCA_900050615.1	st3180	95.745	0	0	0	0	0	99.048	0	0	0	0	0	0	0	0	0	0	0	0	1
GCA_900050625.1	st3193	95.745	100	0	0	0	0	0	0	0	0	0	0	0	0	0	0	0	0	0	1
GCA_900050635.1	st2194	95.745	0	0	0	0	0	99.048	0	0	0	0	0	0	0	0	0	0	0	0	1
GCA_900050645.1	st2316	95.745	100	0	0	0	0	99.048	0	0	0	0	0	0	0	0	0	0	0	0	2
GCA_900051035.1	st2812	95.745	0	0	0	0	0	99.048	0	0	0	0	0	0	0	0	0	0	0	0	1
GCA_900051045.1	st2815	95.745	0	0	0	0	0	0	0	0	0	0	0	0	0	0	0	0	0	0	0
GCA_900051065.1	st2419	95.745	0	0	0	0	0	99.048	0	0	0	0	0	0	0	0	0	0	0	0	1
GCA_900051075.1	st2679	95.745	0	0	0	0	0	99.048	0	0	0	0	0	0	0	0	0	0	0	0	1
GCA_900051085.1	st2691	95.745	0	0	0	0	0	99.048	0	0	0	0	0	0	0	0	0	0	0	0	1
GCA_900051365.1	st1140	95.745	0	0	0	0	0	99.048	0	0	0	0	0	0	0	0	0	0	0	0	1
GCA_900051375.1	st3001	95.745	0	0	0	0	0	99.048	0	0	0	0	0	0	0	0	0	0	0	0	1
GCA_900051775.1	st2808	95.863	0	0	0	0	0	0	0	0	0	0	0	0	0	0	0	0	0	0	0
GCA_900051785.1	st2880	95.745	0	0	0	0	0	99.048	0	0	0	0	0	0	0	0	0	0	0	0	1
GCA_900051795.1	st2885	95.745	0	0	0	0	0	99.048	0	0	0	0	0	0	0	0	0	0	0	0	1
GCA_900051805.1	st1025	95.745	0	0	0	0	0	0	0	0	0	0	0	0	0	0	0	0	0	0	0
GCA_900051815.1	st1666	95.745	0	0	0	0	0	99.048	0	0	0	0	0	0	0	0	0	0	0	0	1
GCA_900052345.1	st2999	95.745	0	0	0	0	0	0	0	0	0	0	0	0	0	0	0	0	0	0	0
GCA_900052355.1	st3203	95.745	0	0	0	0	0	99.048	0	0	0	0	0	0	0	0	0	0	0	0	1
GCA_900052365.1	st1692	95.745	0	0	0	0	0	99.048	0	0	0	0	0	0	0	0	0	0	0	0	1
GCA_900052375.1	st2064	95.745	0	0	0	0	0	99.048	0	0	0	0	0	0	0	0	0	0	0	0	1
GCA_900052655.1	st1425	95.745	0	0	0	0	0	0	0	0	0	0	0	0	0	0	0	0	0	0	0
GCA_900052665.1	st1708	95.745	0	0	0	0	0	99.048	0	0	0	0	0	0	0	0	0	0	0	0	1
GCA_900052675.1	st186	95.745	0	0	0	0	0	99.048	0	0	0	0	0	0	0	0	0	0	0	0	1
GCA_900053455.1	st3171	95.745	0	0	0	0	0	99.048	0	0	0	0	0	0	0	0	0	0	0	0	1
GCA_900053465.1	st1118	95.745	0	0	0	0	0	0	0	0	0	0	0	0	0	0	0	0	0	0	0
GCA_900053485.1	st2117	95.745	0	0	0	0	0	0	0	0	0	0	0	0	0	0	0	0	0	0	0
GCA_900053925.1	st2759	95.745	0	0	0	0	0	99.048	0	0	0	0	0	0	0	0	0	0	0	0	1
GCA_900053935.1	st3241	95.745	0	0	0	0	0	99.048	0	0	0	0	0	0	0	0	0	0	0	0	1
GCA_900054175.1	st3214	95.745	0	0	0	0	0	0	0	0	0	0	0	0	0	0	0	0	0	0	0
GCA_900054445.1	st2674	95.745	0	0	0	0	0	99.048	0	0	0	0	0	0	0	0	0	0	0	0	1
GCA_900054465.1	st1730	99.9	0	0	0	0	0	99.048	0	0	0	0	0	0	0	0	0	0	0	0	1
GCA_900054475.1	st2168	95.745	0	0	0	0	0	99.048	0	0	0	0	0	0	0	0	0	0	0	0	1
GCA_900054485.1	st407	95.745	0	0	0	0	0	99.048	0	0	0	0	0	0	0	0	0	0	0	0	1
GCA_900054495.1	st1642	95.745	100	0	0	0	0	99.048	0	0	0	0	0	0	0	0	0	0	0	0	2
GCA_900054915.1	st1824	95.745	0	0	0	0	0	0	0	0	0	0	0	0	0	0	0	0	0	0	0
GCA_900054925.1	st3262	95.745	0	0	0	0	0	99.048	0	0	0	0	0	0	0	0	0	0	0	0	1
GCA_900054945.1	st1701	95.745	0	0	0	0	0	99.048	0	0	0	0	0	0	0	0	0	0	0	0	1
GCA_900055265.1	st2733	95.745	0	0	0	0	0	0	0	0	0	0	0	0	0	0	0	0	0	0	0
GCA_900055275.1	st2787	95.745	0	0	0	0	0	98.912	0	0	0	0	0	0	0	0	0	0	0	0	1
GCA_900055285.1	st3023	95.745	0	0	0	0	0	0	0	0	0	0	0	0	0	0	0	0	0	0	0
GCA_900055305.1	st2343	95.745	0	0	0	0	0	0	0	0	0	0	0	0	0	0	0	0	0	0	0
GCA_900055645.1	st2932	95.745	0	0	0	0	0	99.048	0	0	0	0	0	0	0	0	0	0	0	0	1
GCA_900055945.1	st2968	95.745	0	0	0	0	0	99.048	0	0	0	0	0	0	0	0	0	0	0	0	1
GCA_900055955.1	st2246	95.745	0	0	0	0	0	0	0	0	0	0	0	0	0	0	0	0	0	0	0
GCA_900056255.1	st2832	95.745	0	0	0	0	0	0	0	0	0	0	0	0	0	0	0	0	0	0	0
GCA_900056265.1	st3258	95.745	0	0	0	0	0	98.95	0	0	0	0	0	0	0	0	0	0	0	0	1
GCA_900056285.1	st3283	95.745	0	0	0	0	0	0	0	0	0	0	0	0	0	0	0	0	0	0	0
GCA_900056315.1	st2181	95.745	0	0	0	0	0	99.048	0	0	0	0	0	0	0	0	0	0	0	0	1
GCA_900056665.1	st2897	95.745	0	0	0	0	0	0	0	0	0	0	0	0	0	0	0	0	0	0	0
GCA_900056675.1	st3281	95.745	0	0	0	0	0	0	0	0	0	0	0	0	0	0	0	0	0	0	0
GCA_900056955.1	st3020	95.745	0	0	0	0	0	0	0	0	0	0	0	0	0	0	0	0	0	0	0
GCA_900057105.1	st2654	95.745	0	0	0	0	0	0	0	0	0	0	0	0	0	0	0	0	0	0	0
GCA_900057285.1	st2890	95.745	0	0	0	0	0	0	0	0	0	0	0	0	0	0	0	0	0	0	0
GCA_900057305.1	st324	95.745	0	0	0	0	0	99.048	0	0	0	0	0	0	0	0	0	0	0	0	1
GCA_900057315.1	st1951	95.745	0	0	0	0	0	99.048	0	0	0	0	0	0	0	0	0	0	0	0	1
GCA_900057325.1	st1993	95.745	0	0	0	0	0	99.048	0	0	0	0	0	0	0	0	0	0	0	0	1
GCA_900057635.1	st910	95.745	0	0	0	0	0	99.048	0	0	0	0	0	0	0	0	0	0	0	0	1
GCA_900057645.1	st2793	95.745	0	0	0	0	0	99.048	0	0	0	0	0	0	0	0	0	0	0	0	1
GCA_900057805.1	st2411	95.745	0	0	0	0	0	0	0	0	0	0	0	0	0	0	0	0	0	0	0
GCA_900057815.1	st2767	95.745	0	0	0	0	0	99.048	0	0	0	0	0	0	0	0	0	0	0	0	1
GCA_900058115.1	st2586	95.745	0	0	0	0	0	0	0	0	0	0	0	0	0	0	0	0	0	0	0
GCA_900058365.1	st3049	95.745	0	0	0	0	0	0	0	0	0	0	0	0	0	0	0	0	0	0	0
GCA_900058375.1	st2809	95.745	0	0	0	0	0	0	0	0	0	0	0	0	0	0	0	0	0	0	0
GCA_900058625.1	st1515	95.745	0	0	0	0	0	99.048	0	0	0	0	0	0	0	0	0	0	0	0	1
GCA_900058885.1	st1595	99.9	0	0	0	0	0	0	0	0	0	0	0	0	0	0	0	0	0	0	0
GCA_900058895.1	st1611	95.745	0	0	0	0	0	99.048	0	0	0	0	0	0	0	0	0	0	0	0	1
GCA_900058905.1	st2819	95.745	0	0	0	0	0	98.92	0	0	0	0	0	0	0	0	0	0	0	0	1
GCA_900058915.1	st2949	95.745	0	0	0	0	0	0	0	0	0	0	0	0	0	0	0	0	0	0	0
GCA_900059245.1	st2768	95.745	0	0	0	0	0	99.048	0	0	0	0	0	0	0	0	0	0	0	0	1
GCA_900059255.1	st2376	95.745	0	0	0	0	0	0	0	0	0	0	0	0	0	0	0	0	0	0	0
GCA_900059265.1	st2443	95.745	0	0	0	0	0	99.048	0	0	0	0	0	0	0	0	0	0	0	0	1
GCA_900059615.1	st1458	95.745	0	0	0	0	0	99.048	0	0	0	0	0	0	0	0	0	0	0	0	1
GCA_900059815.1	st3222	95.745	0	0	0	0	0	0	0	0	0	0	0	0	0	0	0	0	0	0	0
GCA_900060035.1	st68	95.745	0	0	0	0	0	99.048	0	0	0	0	0	0	0	0	0	0	0	0	1
GCA_900060215.1	st3113	95.745	0	0	0	0	0	0	0	0	0	0	0	0	0	0	0	0	0	0	0
GCA_900060465.1	st2825	95.745	0	0	0	0	0	99.048	0	0	0	0	0	0	0	0	0	0	0	0	1
GCA_900060475.1	st113	95.745	0	0	0	0	0	99.048	0	0	0	0	0	0	0	0	0	0	0	0	1
GCA_900060485.1	st257	95.745	0	0	0	0	0	99.048	0	0	0	0	0	0	0	0	0	0	0	0	1
GCA_900060495.1	st1925	95.745	0	0	0	0	0	99.048	0	0	0	0	0	0	0	0	0	0	0	0	1
GCA_900060805.1	st3129	95.745	0	0	0	0	0	99.048	0	0	0	0	0	0	0	0	0	0	0	0	1
GCA_900061095.1	st2901	95.745	0	0	0	0	0	99.048	0	0	0	0	0	0	0	0	0	0	0	0	1
GCA_900061115.1	st2474	95.745	0	0	0	0	0	0	0	0	0	0	0	0	0	0	0	0	0	0	0
GCA_900061125.1	st2481	95.652	0	0	0	0	0	0	0	0	0	0	0	0	0	0	0	0	0	0	0
GCA_900061735.1	st2953	95.745	0	0	0	0	0	99.048	0	0	0	0	0	0	0	0	0	0	0	0	1
GCA_900061985.1	st684	95.745	0	0	0	0	0	0	0	0	0	0	0	0	0	0	0	0	0	0	0
GCA_900062125.1	st3125	95.745	0	0	0	0	0	0	0	0	0	0	0	0	0	0	0	0	0	0	0
GCA_900062135.1	st1740	95.745	0	0	0	0	0	99.048	0	0	0	0	0	0	0	0	0	0	0	0	1
GCA_900062145.1	st1936	95.745	0	0	0	0	0	99.048	0	0	0	0	0	0	0	0	0	0	0	0	1
GCA_900062765.1	st759	95.745	0	0	0	0	0	99.048	0	0	0	0	0	0	0	0	0	0	0	0	1
GCA_900062775.1	st1289	95.745	0	0	0	0	0	99.048	0	0	0	0	0	0	0	0	0	0	0	0	1
GCA_900062785.1	st1781	95.745	0	0	0	0	0	99.048	0	0	0	0	0	0	0	0	0	0	0	0	1
GCA_900062795.1	st1913	95.745	0	0	0	0	0	99.048	0	0	0	0	0	0	0	0	0	0	0	0	1
GCA_900062885.1	st2076	95.745	0	0	0	0	0	99.048	0	0	0	0	0	0	0	0	0	0	0	0	1
GCA_900062895.1	st2632	95.745	0	0	0	0	0	98.641	0	0	0	0	0	0	0	0	0	0	0	0	1
GCA_900062905.1	st2898	97.872	0	0	0	0	0	99.048	0	0	0	0	0	0	100	0	0	0	0	0	2
GCA_900063305.1	st2908	95.745	0	0	0	0	0	99.048	0	0	0	0	0	0	0	0	0	0	0	0	1
GCA_900063315.1	st2952	95.745	0	0	0	0	0	0	0	0	0	0	0	0	0	0	0	0	0	0	0
GCA_900063325.1	st3263	95.745	0	0	0	0	0	99.048	0	0	0	0	0	0	0	0	0	0	0	0	1
GCA_900063945.1	st2917	95.745	0	0	0	0	0	99.048	0	0	0	0	0	0	0	0	0	0	0	0	1
GCA_900063955.1	st2935	98.227	100	0	0	100	0	99.048	0	0	0	0	0	0	0	0	0	0	0	0	3
GCA_900064045.1	st1474	95.745	0	0	0	0	0	0	0	0	0	0	0	0	0	0	0	0	0	0	0
GCA_900064225.1	st2784	95.745	0	0	0	0	0	99.048	0	0	0	0	0	0	0	0	0	0	0	0	1
GCA_900064235.1	st2878	95.745	0	0	0	0	0	99.048	0	0	0	0	0	0	0	0	0	0	0	0	1
GCA_900064245.1	st2215	95.745	0	0	0	0	0	99.048	0	0	0	0	0	0	0	0	0	0	0	0	1
GCA_900064445.1	st2197	95.745	0	0	0	0	0	99.048	0	0	0	0	0	0	0	0	0	0	0	0	1
GCA_900064455.1	st2506	95.745	0	0	0	0	0	99.048	0	0	0	0	0	0	0	0	0	0	0	0	1
GCA_900064505.1	st2675	95.745	0	0	0	0	0	99.048	0	0	0	0	0	0	0	0	0	0	0	0	1
GCA_900064515.1	st2686	95.745	0	0	0	0	0	98.912	0	0	0	0	0	0	0	0	0	0	0	0	1
GCA_900064525.1	st2713	95.745	0	0	0	0	0	99.048	0	0	0	0	0	0	0	0	0	0	0	0	1
GCA_900064535.1	st2727	95.745	0	0	0	0	0	0	0	0	0	0	0	0	0	0	0	0	0	0	0
GCA_900064555.1	st1829	95.745	0	0	0	0	0	99.048	0	0	0	0	0	0	0	0	0	0	0	0	1
GCA_900064565.1	st2393	95.745	0	0	0	0	0	0	0	0	0	0	0	0	0	0	0	0	0	0	0
GCA_900064575.1	st2930	95.745	0	0	0	0	0	0	0	0	0	0	0	0	0	0	0	0	0	0	0
GCA_900064585.1	st893	95.745	0	0	0	0	0	0	0	0	0	0	0	0	0	0	0	0	0	0	0
GCA_900064785.1	st2994	95.745	0	0	0	0	0	99.048	0	0	0	0	0	0	0	0	0	0	0	0	1
GCA_900064795.1	st535	95.745	0	0	0	0	0	99.048	0	0	0	0	0	0	0	0	0	0	0	0	1
GCA_900065125.1	st2920	95.745	0	0	0	0	0	99.048	0	0	0	0	0	0	100	0	0	0	0	0	2
GCA_900065325.1	st875	95.745	0	0	0	0	0	99.048	0	0	0	0	0	0	0	0	0	0	0	0	1
GCA_900065335.1	st1322	99.9	0	0	0	0	0	99.048	0	0	0	0	0	0	0	0	0	0	0	0	1
GCA_900065345.1	st1352	95.745	0	0	0	0	0	99.048	0	0	0	0	0	0	0	0	0	0	0	0	1
GCA_900065455.1	st3261	95.745	0	0	0	0	0	99.048	0	0	0	0	0	0	0	0	0	0	0	0	1
GCA_900482515.1	EOE016	95.745	0	0	0	100	0	99.048	0	0	0	0	0	0	0	0	0	0	0	0	2
GCA_900482525.1	EOE033	95.745	0	0	0	0	0	99.048	0	0	0	0	0	0	0	0	0	0	0	0	1
GCA_900482535.1	EOE013	95.745	0	0	0	0	0	0	0	0	0	0	0	0	0	0	0	0	0	0	0
GCA_900482555.1	EOE034	95.745	0	0	0	0	0	99.048	0	0	0	0	0	0	0	0	0	0	0	0	1
GCA_900482565.1	EOE014	95.863	99.869	0	0	0	0	0	0	0	0	0	0	0	0	0	0	0	0	0	1
GCA_900482595.1	EOE048	95.745	0	0	0	0	0	99.048	0	0	0	0	0	0	0	0	0	0	0	0	1
GCA_900482615.1	EOE046	95.745	0	0	0	0	0	99.048	0	0	0	0	0	0	0	0	0	0	0	0	1
GCA_900482625.1	EOE047	95.745	0	0	0	0	0	99.048	0	0	0	0	0	0	0	0	0	0	0	0	1
GCA_900482645.1	EOE009	95.745	0	0	0	0	0	99.048	0	0	0	0	0	0	0	0	0	0	0	0	1
GCA_900482675.1	EOE134	95.745	0	0	0	0	0	0	0	0	0	0	0	0	0	0	0	0	0	0	0
GCA_900482695.1	EOE135	95.745	0	0	0	0	0	99.048	0	0	0	0	0	0	0	0	0	0	0	0	1
GCA_900482705.1	EOE051	95.745	0	0	0	0	0	99.048	0	0	0	0	0	0	0	0	0	0	0	0	1
GCA_900482725.1	EOE110	95.745	0	0	0	0	0	99.048	0	0	0	0	0	0	0	0	0	0	0	0	1
GCA_900482735.1	EOE113	95.745	0	0	0	0	0	99.048	0	0	0	0	0	0	0	0	0	0	0	0	1
GCA_900482755.1	EOE037	95.745	0	0	0	0	0	99.048	0	0	0	0	0	0	0	0	0	0	0	0	1
GCA_900482775.1	EOE111	95.745	0	0	0	0	0	99.048	0	0	0	0	0	0	0	0	0	0	0	0	1
GCA_900482785.1	EOE109	95.745	0	0	0	0	0	99.048	0	0	0	0	0	0	0	0	0	0	0	0	1
GCA_900482795.1	EOE011	95.745	0	0	0	0	0	0	0	0	0	0	0	0	0	0	0	0	0	0	0
GCA_900482805.1	EOE053	95.745	0	0	0	0	0	99.048	0	0	0	0	0	0	0	0	0	0	0	0	1
GCA_900482835.1	EOE151	95.745	0	0	0	0	0	0	0	0	0	0	0	0	0	0	0	0	0	0	0
GCA_900482845.1	EOE114	95.745	0	0	0	0	0	99.048	0	0	0	0	0	0	0	0	0	0	0	0	1
GCA_900482855.1	EOE108	95.745	0	0	0	0	0	99.048	0	0	0	0	0	0	0	0	0	0	0	0	1
GCA_900482865.1	EOE138	95.745	0	0	0	0	0	99.048	0	0	0	0	0	0	0	0	0	0	0	0	1
GCA_900482875.1	EOE139	95.745	0	0	0	0	0	99.048	0	0	0	0	0	0	0	0	0	0	0	0	1
GCA_900482885.1	EOE036	95.745	0	0	0	0	0	99.048	0	0	0	0	0	0	0	0	0	0	0	0	1
GCA_900482895.1	EOE017	95.745	0	0	0	0	0	0	0	0	0	0	0	0	0	0	0	0	0	0	0
GCA_900482905.1	EOE112	95.745	0	0	0	0	0	99.048	0	0	0	0	0	0	0	0	0	0	0	0	1
GCA_900482915.1	EOE147	95.745	0	0	0	0	0	99.048	0	0	0	0	0	0	0	0	0	0	0	0	1
GCA_900482945.1	EOE038	95.745	0	0	0	0	0	99.048	0	0	0	0	0	0	0	0	0	0	0	0	1
GCA_900482955.1	EOE146	95.745	0	0	0	0	0	99.048	0	0	0	0	0	0	0	0	0	0	0	0	1
GCA_900482965.1	EOE141	95.745	0	0	0	0	0	99.048	0	0	0	0	0	0	0	0	0	0	0	0	1
GCA_900482975.1	EOE145	95.745	0	0	0	0	0	99.048	0	0	0	0	0	0	0	0	0	0	0	0	1
GCA_900483005.1	EOE179	95.745	0	0	0	0	0	99.048	0	0	0	0	0	0	0	0	0	0	0	0	1
GCA_900483015.1	EOE115	95.745	0	0	0	0	0	99.048	0	0	0	0	0	0	0	0	0	0	0	0	1
GCA_900483025.1	EOE157	95.745	0	0	0	0	0	99.048	0	0	0	0	0	0	0	0	0	0	0	0	1
GCA_900483035.1	EOE143	95.745	0	0	0	0	0	99.048	0	0	0	0	0	0	0	0	0	0	0	0	1
GCA_900483045.1	EOE177	95.745	0	0	0	0	0	99.048	0	0	0	0	0	0	0	0	0	0	0	0	1
GCA_900483055.1	EOE142	95.745	0	0	0	0	0	0	0	0	0	0	0	0	0	0	0	0	0	0	0
GCA_900483075.1	EOE180	95.745	0	0	0	0	0	99.048	0	0	0	0	0	0	0	0	0	0	0	0	1
GCA_900483085.1	EOE152	95.745	0	0	0	0	0	99.048	0	0	0	0	0	0	0	0	0	0	0	0	1
GCA_900483095.1	EOE150	95.745	0	0	0	0	0	99.048	0	0	0	0	0	0	0	0	0	0	0	0	1
GCA_900483105.1	EOE156	95.745	0	0	0	0	0	99.048	0	0	0	0	0	0	0	0	0	0	0	0	1
GCA_900483115.1	EOE185	95.745	0	0	0	0	0	99.048	0	0	0	0	0	0	0	0	0	0	0	0	1
GCA_900483125.1	EOE188	95.745	0	0	0	0	0	99.048	0	0	0	0	0	0	0	0	0	0	0	0	1
GCA_900483135.1	EOE189	95.745	0	0	0	0	0	99.048	0	0	0	0	0	0	0	0	0	0	0	0	1
GCA_900483145.1	EOE186	95.745	0	0	0	0	0	99.048	0	0	0	0	0	0	0	0	0	0	0	0	1
GCA_900483165.1	EOE181	95.745	0	0	0	0	0	0	0	0	0	0	0	0	0	0	0	0	0	0	0
GCA_900483175.1	EOE168	95.745	0	0	0	0	0	99.048	0	0	0	0	0	0	0	0	0	0	0	0	1
GCA_900483185.1	EOE172	95.745	0	0	0	0	0	99.048	0	0	0	0	0	0	0	0	0	0	0	0	1
GCA_900483195.1	EOE164	95.745	0	0	0	0	0	99.048	0	0	0	0	0	0	0	0	0	0	0	0	1
GCA_900483205.1	EOE195	95.745	0	0	0	0	0	99.048	0	0	0	0	0	0	0	0	0	0	0	0	1
GCA_900483225.1	EOE199	95.745	0	0	0	0	0	99.048	0	0	0	0	0	0	0	0	0	0	0	0	1
GCA_900483235.1	EOE183	95.745	0	0	0	0	0	99.048	0	0	0	0	0	0	0	0	0	0	0	0	1
GCA_900483245.1	EOE202	95.745	0	0	0	0	0	99.048	0	0	0	0	0	0	0	0	0	0	0	0	1
GCA_900483255.1	EOE200	95.745	0	0	0	0	0	99.048	0	0	0	0	0	0	0	0	0	0	0	0	1
GCA_900483265.1	EOE178	95.745	0	0	0	0	0	0	0	0	0	0	0	0	0	0	0	0	0	0	0
GCA_900483275.1	EOE201	95.745	0	0	0	0	0	99.048	0	0	0	0	0	0	0	0	0	0	0	0	1
GCA_900483285.1	EOE196	95.745	0	0	0	0	0	0	0	0	0	0	0	0	0	0	0	0	0	0	0
GCA_900483295.1	EOE043	95.745	0	0	0	0	0	99.048	0	0	0	0	0	0	0	0	0	0	0	0	1
GCA_900483305.1	EOE187	95.745	0	0	0	0	0	99.048	0	0	0	0	0	0	0	0	0	0	0	0	1
GCA_900483315.1	EOE213	95.745	0	0	0	0	0	99.048	0	0	0	0	0	0	0	0	0	0	0	0	1
GCA_900483325.1	EOE215	95.745	0	0	0	0	0	99.048	0	0	0	0	0	0	0	0	0	0	0	0	1
GCA_900483335.1	EOE212	95.745	0	0	0	0	0	99.048	0	0	0	0	0	0	0	0	0	0	0	0	1
GCA_900483345.1	EOE214	95.745	0	0	0	0	0	99.048	0	0	0	0	0	0	0	0	0	0	0	0	1
GCA_900483355.1	EOE191	95.745	0	0	0	0	0	99.048	0	0	0	0	0	0	0	0	0	0	0	0	1
GCA_900483365.1	EOE182	95.745	0	0	0	0	0	0	0	0	0	0	0	0	0	0	0	0	0	0	0
GCA_900483375.1	EOE190	95.745	0	0	0	0	0	99.048	0	0	0	0	0	0	0	0	0	0	0	0	1
GCA_900483385.1	EOE192	95.745	0	0	0	0	0	99.048	0	0	0	0	0	0	0	0	0	0	0	0	1
GCA_900483405.1	EOE194	95.745	0	0	0	0	0	99.048	0	0	0	0	0	0	0	0	0	0	0	0	1
GCA_900483415.1	EOE211	95.745	0	0	0	0	0	99.048	0	0	0	0	0	0	0	0	0	0	0	0	1
GCA_900483425.1	EOE184	95.745	0	0	0	0	0	99.048	0	0	0	0	0	0	0	0	0	0	0	0	1
GCA_900483435.1	EOE223	95.745	0	0	0	0	0	99.048	0	0	0	0	0	0	0	0	0	0	0	0	1
GCA_900483445.1	EOE197	95.745	0	0	0	0	0	0	0	0	0	0	0	0	0	0	0	0	0	0	0
GCA_900483455.1	EOE224	95.745	0	0	0	0	0	99.048	0	0	0	0	0	0	0	0	0	0	0	0	1
GCA_900483465.1	EOE207	95.745	0	0	0	0	0	99.048	0	0	0	0	0	0	0	0	0	0	0	0	1
GCA_900483475.1	EOE222	95.745	0	0	0	0	0	99.048	0	0	0	0	0	0	0	0	0	0	0	0	1
GCA_900483495.1	EOE210	95.745	0	0	0	0	0	99.048	0	0	0	0	0	0	0	0	0	0	0	0	1
GCA_900483505.1	EOE218	95.745	0	0	0	0	0	99.048	0	0	0	0	0	0	0	0	0	0	0	0	1
GCA_900483515.1	EOE235	95.745	0	0	0	0	0	99.048	0	0	0	0	0	0	0	0	0	0	0	0	1
GCA_900483525.1	EOE219	95.745	0	0	0	0	0	99.048	0	0	0	0	0	0	0	0	0	0	0	0	1
GCA_900483545.1	EOE216	95.745	0	0	0	0	0	99.048	0	0	0	0	0	0	0	0	0	0	0	0	1
GCA_900483585.1	EOE241	95.745	0	0	0	0	0	99.048	0	0	0	0	0	0	0	0	0	0	0	0	1
GCA_900483595.1	EOE240	95.745	0	0	0	0	0	99.048	0	0	0	0	0	0	100	0	0	0	0	0	2
GCA_900483605.1	EOE238	95.745	0	0	0	0	0	99.048	0	0	0	0	0	0	0	0	0	0	0	0	1
GCA_900483615.1	EOE242	95.745	0	0	0	0	0	99.048	0	0	0	0	0	0	0	0	0	0	0	0	1
GCA_900483635.1	EOE252	95.745	0	0	0	0	0	0	0	0	0	0	0	0	0	0	0	0	0	0	0
GCA_900483645.1	EOE251	95.745	0	0	0	0	0	99.048	0	0	0	0	0	0	0	0	0	0	0	0	1
GCA_900483655.1	EOE253	95.745	0	0	0	0	0	99.048	0	0	0	0	0	0	0	0	0	0	0	0	1
GCA_900483665.1	EOE236	95.745	0	0	0	0	0	99.048	0	0	0	0	0	0	0	0	0	0	0	0	1
GCA_900483675.1	EOE226	95.745	0	0	0	0	0	99.048	0	0	0	0	0	0	0	0	0	0	0	0	1
GCA_900483685.1	EOE232	95.745	0	0	0	0	0	99.048	0	0	0	0	0	0	0	0	0	0	0	0	1
GCA_900483695.1	EOE227	95.745	0	0	0	0	0	99.048	0	0	0	0	0	0	0	0	0	0	0	0	1
GCA_900483705.1	EOE262	95.745	0	0	0	0	0	99.048	0	0	0	0	0	0	0	0	0	0	0	0	1
GCA_900483715.1	EOE247	95.652	0	0	0	0	0	99.048	0	0	0	0	0	0	0	0	0	0	0	0	1
GCA_900483725.1	EOE256	95.745	0	0	0	0	0	99.048	0	0	0	0	0	0	0	0	0	0	0	0	1
GCA_900483735.1	EOE264	95.745	0	0	0	0	0	99.048	0	0	0	0	0	0	0	0	0	0	0	0	1
GCA_900483755.1	EOE267	95.745	0	0	0	0	0	0	0	0	0	0	0	0	0	0	0	0	0	0	0
GCA_900483765.1	EOE244	95.745	0	0	0	0	0	99.048	0	0	0	0	0	0	0	0	0	0	0	0	1
GCA_900483775.1	EOE228	95.745	0	0	0	0	0	99.048	0	0	0	0	0	0	0	0	0	0	0	0	1
GCA_900483785.1	EOE230	95.745	0	0	0	0	0	0	0	0	0	0	0	0	0	0	0	0	0	0	0
GCA_900483795.1	EOE266	95.745	0	0	0	0	0	99.048	0	0	0	0	0	0	0	0	0	0	0	0	1
GCA_900483805.1	EOE263	95.745	0	0	0	0	0	99.048	0	0	0	0	0	0	0	0	0	0	0	0	1
GCA_900483815.1	EOE250	95.745	0	0	0	0	0	99.048	0	0	0	0	0	0	0	0	0	0	0	0	1
GCA_900483825.1	EOE249	95.745	0	0	0	0	0	0	0	0	0	0	0	0	0	0	0	0	0	0	0
GCA_900483835.1	EOE254	95.745	0	0	0	0	0	99.048	0	0	0	0	0	0	0	0	0	0	0	0	1
GCA_900483845.1	EOE243	95.745	0	0	0	0	0	0	0	0	0	0	0	0	0	0	0	0	0	0	0
GCA_900483865.1	EOE245	95.745	0	0	0	0	0	0	0	0	0	0	0	0	0	0	0	0	0	0	0
GCA_900483885.1	EOE221	95.745	0	0	0	0	0	99.048	0	0	0	0	0	0	0	0	0	0	0	0	1
GCA_900483905.1	EOE231	95.745	0	0	0	0	0	99.048	0	0	0	0	0	0	0	0	0	0	0	0	1
GCA_900483915.1	EOE273	95.745	0	0	0	0	0	99.048	0	0	0	0	0	0	0	0	0	0	0	0	1
GCA_900483925.1	EOE246	95.745	0	0	0	0	0	99.048	0	0	0	0	0	0	0	0	0	0	0	0	1
GCA_900483935.1	EOE277	95.745	0	0	0	0	0	99.048	0	0	0	0	0	0	0	0	0	0	0	0	1
GCA_900483945.1	EOE248	95.745	0	0	0	0	0	99.048	0	0	0	0	0	0	0	0	0	0	0	0	1
GCA_900483955.1	EOE044	95.745	0	0	0	0	0	99.048	0	0	0	0	0	0	0	0	0	0	0	0	1
GCA_900483965.1	EOE271	95.745	0	0	0	0	0	99.048	0	0	0	0	0	0	0	0	0	0	0	0	1
GCA_900483985.1	EOE260	95.745	0	0	0	0	0	99.048	0	0	0	0	0	0	0	0	0	0	0	0	1
GCA_900484005.1	EOE257	95.745	0	0	0	0	0	99.048	0	0	0	0	0	0	0	0	0	0	0	0	1
GCA_900484055.1	EOE270	95.745	0	0	0	0	0	99.048	0	0	0	0	0	0	0	0	0	0	0	0	1
GCA_900484085.1	EOE261	95.745	0	0	0	0	0	99.048	0	0	0	0	0	0	0	0	0	0	0	0	1
GCA_900484105.1	EOE203	95.745	0	0	0	0	0	99.048	0	0	0	0	0	0	0	0	0	0	0	0	1
GCA_900484115.1	EOE144	95.745	0	0	0	0	0	99.048	0	0	0	0	0	0	0	0	0	0	0	0	1
GCA_900484135.1	EOE255	95.745	0	0	0	0	0	0	0	0	0	0	0	0	0	0	0	0	0	0	0
GCA_900484145.1	EOE272	95.745	0	0	0	0	0	99.048	0	0	0	0	0	0	0	0	0	0	0	0	1
GCA_900484155.1	EOE278	95.745	0	0	0	0	0	0	0	0	0	0	0	0	0	0	0	0	0	0	0
GCA_900484185.1	EOE160	95.745	0	0	0	0	0	99.048	0	0	0	0	0	0	0	0	0	0	0	0	1
GCA_900484255.1	EOE012	95.745	0	0	0	0	0	99.048	0	0	0	0	0	0	0	0	0	0	0	0	1
GCA_900484325.1	EOE159	95.745	0	0	0	0	0	99.048	0	0	0	0	0	0	0	0	0	0	0	0	1
GCA_900484395.1	EOE056	95.745	0	0	0	0	0	99.048	0	0	0	0	0	0	0	0	0	0	0	0	1
GCA_900484425.1	EOE204	95.745	0	0	0	0	0	99.048	0	0	0	0	0	0	0	0	0	0	0	0	1
GCA_900484495.1	EOE040	95.745	0	0	0	0	0	99.048	0	0	0	0	0	0	0	0	0	0	0	0	1
GCA_900484515.1	EOE055	95.745	0	0	0	0	0	99.048	0	0	0	0	0	0	0	0	0	0	0	0	1
GCA_900490345.1	EOE136	95.745	0	0	0	0	0	0	0	0	0	0	0	0	0	0	0	0	0	0	0
GCA_001192075.1	BSAR194_2	95.745	0	0	0	0	0	99.048	0	0	0	0	0	0	0	0	0	0	0	0	1
GCA_001192895.1	BSAR747	95.745	0	0	0	0	0	98.963	0	0	0	0	0	0	0	0	0	0	0	0	1
GCA_001195105.1	BSAR163_2	95.745	0	0	0	0	0	0	0	0	0	0	0	0	0	0	0	0	0	0	0
GCA_001195205.1	BSAR160_2	95.745	0	0	0	0	0	0	0	0	0	0	0	0	0	0	0	0	0	0	0
GCA_001201035.1	BSAR724	95.745	0	0	0	0	0	99.048	0	0	0	0	0	0	0	0	0	0	0	0	1
GCA_001209785.1	BSAR725	95.745	0	0	0	0	0	99.048	0	0	0	0	0	0	0	0	0	0	0	0	1
GCA_001211025.1	BSAR161_2	95.745	0	0	0	0	0	0	0	0	0	0	0	0	0	0	0	0	0	0	0
GCA_001223625.1	07-01492	95.863	0	0	0	99.218	0	0	0	0	0	0	0	0	0	0	0	0	0	0	1
GCA_001223645.1	07-01744	95.745	0	0	0	0	0	99.048	0	0	0	0	0	0	100	0	0	0	0	0	2
GCA_001223665.1	06-01552	95.745	0	0	0	0	0	99.048	0	0	0	0	0	0	0	0	0	0	0	0	1
GCA_001223705.1	03-00220	95.981	0	0	0	0	0	99.048	0	0	0	0	0	0	0	0	0	0	0	0	1
GCA_001223865.1	HO 5378 0592 11	95.745	0	0	0	0	0	0	0	0	0	0	0	0	0	0	0	0	0	0	0
GCA_001223965.1	07-03347	0	0	0	0	0	0	0	0	0	0	0	0	0	0	0	0	0	0	0	0
GCA_001224045.1	07-02992	95.745	0	0	0	0	0	0	0	0	0	0	0	0	0	0	0	0	0	0	0
GCA_001224085.1	1998/B23	95.863	0	0	0	0	0	0	0	0	0	0	0	0	0	0	0	0	0	0	0
GCA_001224165.1	08-01668	95.745	0	0	0	0	0	0	0	0	0	0	0	0	0	0	0	0	0	0	0
GCA_001224285.1	07-03168	0	0	0	0	0	0	0	0	0	0	0	0	0	0	0	0	0	0	0	0
GCA_001224525.1	06-00896	95.863	0	0	0	99.218	0	0	0	0	0	0	0	0	0	0	0	0	0	0	1
GCA_001224605.1	08-01673	99.9	0	0	0	0	0	0	0	0	0	0	0	0	0	0	0	0	0	0	0
GCA_001224685.1	07-03348-1	95.745	0	0	0	0	0	0	0	0	0	0	0	0	0	0	0	0	0	0	0
GCA_001224825.1	07-00063	99.851	0	0	0	0	0	99.048	0	0	0	0	0	0	0	0	0	0	0	0	1
GCA_001224925.1	08-01481-1	95.626	0	0	0	0	0	99.048	0	0	0	0	0	0	0	0	0	0	0	0	1
GCA_001224945.1	04-00609	95.863	0	0	0	99.218	0	0	0	0	0	0	0	0	0	0	0	0	0	0	1
GCA_001225505.1	07-02989	95.745	0	0	0	0	0	99.048	0	0	0	0	0	0	0	0	0	0	0	0	1
GCA_001225525.1	07-02159	95.863	99.869	0	0	0	0	99.048	0	0	0	0	0	0	0	0	0	0	0	0	2
GCA_001225545.1	09-00683	95.863	100	0	0	0	0	0	0	0	0	0	0	0	0	0	0	0	0	0	1
GCA_001225585.1	08-01483	96.093	0	0	0	0	0	99.048	0	0	0	0	0	0	0	0	0	0	0	0	1
GCA_001225625.1	H65	95.745	0	0	0	0	0	0	0	0	0	0	0	0	0	0	0	0	0	0	0
GCA_001225705.1	H431 62	95.745	0	0	0	0	0	99.048	0	0	0	0	0	0	0	0	0	0	0	0	1
GCA_001225865.1	07-00062	95.745	0	0	0	0	0	99.048	0	0	0	0	0	0	0	0	0	0	0	0	1
GCA_001225945.1	07-02088	95.745	0	0	0	0	0	99.048	0	0	0	0	0	0	0	0	0	0	0	0	1
GCA_001225965.1	07-03350	95.745	0	0	0	0	0	0	0	0	0	0	0	0	0	0	0	0	0	0	0
GCA_001226125.1	06-02751	95.745	0	0	0	0	0	99.048	0	0	0	0	0	0	0	0	0	0	0	0	1
GCA_001226165.1	08-01480	99.9	0	0	0	0	0	99.048	0	0	0	0	0	0	0	0	0	0	0	0	1
GCA_001226205.1	09-00981	95.745	0	0	0	0	0	99.048	0	0	0	0	0	0	0	0	0	0	0	0	1
GCA_001226305.1	08-01485	95.745	0	0	0	0	0	99.048	0	0	0	0	0	0	0	0	0	0	0	0	1
GCA_001226365.1	06-01900	95.745	0	0	0	0	0	99.048	0	0	0	0	0	0	0	0	0	0	0	0	1
GCA_001226445.1	08-00602	95.745	0	0	0	0	0	99.048	0	0	0	0	0	0	0	0	0	0	0	0	1
GCA_001226465.1	434.07	95.745	100	0	0	0	0	99.048	0	0	0	0	0	0	0	0	0	0	0	0	2
GCA_001226565.1	ARI11	95.745	0	0	0	0	0	0	0	0	0	0	0	0	0	0	0	0	0	0	0
GCA_001226585.1	09-01245	95.745	0	0	0	0	0	0	0	0	0	0	0	0	0	0	0	0	0	0	0
GCA_001226605.1	07-02901	95.863	0	0	0	99.218	0	0	0	0	0	0	0	0	0	0	0	0	0	0	1
GCA_001226785.1	06-01347	95.745	0	0	0	0	0	0	0	0	0	0	0	0	0	0	0	0	0	0	0
GCA_001227025.1	07-03339	95.745	0	0	0	0	0	99.048	0	0	0	0	0	0	0	0	0	0	0	0	1
GCA_001227105.1	07-03346	95.745	0	0	0	0	0	0	0	0	0	0	0	0	0	0	0	0	0	0	0
GCA_001227145.1	05-01089	95.863	0	0	0	99.218	0	0	0	0	0	0	0	0	0	0	0	0	0	0	1
GCA_001227185.1	08-01672	99.9	0	0	0	0	0	0	0	0	0	0	0	0	0	0	0	0	0	0	0
GCA_001227325.1	96-01678_H	95.745	0	0	0	0	0	0	0	0	0	0	0	0	0	0	0	0	0	0	0
GCA_001227445.1	08-01484	95.745	0	0	0	0	0	99.048	0	0	0	0	0	0	0	0	0	0	0	0	1
GCA_001227645.1	04-02315-1	95.863	0	0	0	0	0	0	0	0	0	0	0	0	0	0	0	0	0	0	0
GCA_001227685.1	1018.07	95.745	100	0	0	0	0	99.048	0	0	0	0	0	0	0	0	0	0	0	0	2
GCA_001227885.1	98-26821	95.745	0	0	0	0	0	0	0	0	0	0	0	0	0	0	0	0	0	0	0
GCA_001227925.1	07-01932	95.863	0	0	0	0	0	0	0	0	0	0	0	0	100	0	0	0	0	0	1
GCA_001227965.1	08-01666	95.745	0	0	0	0	0	99.048	0	0	0	0	0	0	0	0	0	0	0	0	1
GCA_001228025.1	RH 0600 0061 09	95.745	0	0	0	0	0	0	0	0	0	0	0	0	0	0	0	0	0	0	0
GCA_001228085.1	F902 02	95.745	0	0	0	0	0	0	0	0	0	0	0	0	0	0	0	0	0	0	0
GCA_001228345.1	91/5370	95.745	0	0	0	0	0	0	0	0	0	0	0	0	0	0	0	0	0	0	0
GCA_001228385.1	07-01319	95.745	0	0	0	0	0	99.048	0	0	0	0	0	0	0	0	0	0	0	0	1
GCA_001228505.1	HO 5322 0548 09	95.745	0	0	0	0	0	0	0	0	0	0	0	0	0	0	0	0	0	0	0
GCA_001228765.1	07-00061	95.745	0	0	0	0	0	99.048	0	0	0	0	0	0	0	0	0	0	0	0	1
GCA_001228885.1	09-00984	95.745	0	0	0	0	0	99.048	0	0	0	0	0	0	0	0	0	0	0	0	1
GCA_001228925.1	07-02477	95.745	0	0	0	0	0	99.048	0	0	0	0	0	0	0	0	0	0	0	0	1
GCA_001229005.1	04-03103	95.745	0	0	0	0	0	99.048	0	0	0	0	0	0	0	0	0	0	0	0	1
GCA_001229165.1	03-00397	95.745	0	0	0	0	0	99.048	0	0	0	0	0	0	0	0	0	0	0	0	1
GCA_001229205.1	AR 0650 784	95.745	0	0	0	0	0	0	0	0	0	0	0	0	0	0	0	0	0	0	0
GCA_001229285.1	09-00678	95.863	100	0	0	0	0	0	0	0	0	0	0	0	0	0	0	0	0	0	1
GCA_001229305.1	712181	95.745	0	0	0	0	0	99.048	0	0	0	0	0	0	0	0	0	0	0	0	1
GCA_001229405.1	HO 7258 0470 05	95.745	0	0	0	0	0	0	0	0	0	0	0	0	0	0	0	0	0	0	0
GCA_001229525.1	07-03351	95.745	0	0	0	0	0	0	0	0	0	0	0	0	0	0	0	0	0	0	0
GCA_001229565.1	08-01490	95.745	0	0	0	0	0	99.048	0	0	0	0	0	0	0	0	0	0	0	0	1
GCA_001229585.1	07-03340	99.9	0	0	0	0	0	99.048	0	0	0	0	0	0	0	0	0	0	0	0	1
GCA_001229705.1	91/11452	95.745	0	0	0	0	0	0	0	0	0	0	0	0	0	0	0	0	0	0	0
GCA_001229845.1	09-01247	95.745	0	0	0	0	0	0	0	0	0	0	0	0	0	0	0	0	0	0	0
GCA_001229865.1	T505 30	95.745	0	0	0	0	0	0	0	0	0	0	0	0	0	0	0	0	0	0	0
GCA_001229925.1	09-00980	95.745	0	0	0	0	0	99.048	0	0	0	0	0	0	0	0	0	0	0	0	1
GCA_001230005.1	729192	95.745	0	0	0	0	0	99.048	0	0	0	0	0	0	0	0	0	0	0	0	1
GCA_001230065.1	08-01486	95.745	0	0	0	0	0	99.048	0	0	0	0	0	0	0	0	0	0	0	0	1
GCA_001230105.1	1091.00	95.745	0	0	0	0	0	0	0	0	0	0	0	0	0	0	0	0	0	0	0
GCA_001230425.1	07-02789	95.745	0	0	0	0	0	99.048	0	0	0	0	0	0	0	0	0	0	0	0	1
GCA_001230485.1	07-02389	0	0	0	0	0	0	0	0	0	0	0	0	0	0	0	0	0	0	0	0
GCA_001230665.1	08-01491	96.334	0	0	0	0	0	99.043	0	0	0	0	0	0	0	0	0	0	0	0	1
GCA_001230825.1	06-01686	95.745	0	0	0	0	0	0	0	0	0	0	0	0	0	0	0	0	0	0	0
GCA_001231225.1	08-01671	95.745	0	0	0	0	0	0	0	0	0	0	0	0	0	0	0	0	0	0	0
GCA_001231305.1	06-02459	95.745	0	0	0	0	0	99.048	0	0	0	0	0	0	0	0	0	0	0	0	1
GCA_001231445.1	06-02400	95.745	0	0	0	0	0	99.048	0	0	0	0	0	0	0	0	0	0	0	0	1
GCA_001231525.1	07-00655	95.745	0	0	0	0	0	99.048	0	0	0	0	0	0	0	0	0	0	0	0	1
GCA_001231565.1	04-03111	95.745	0	0	0	0	0	99.048	0	0	0	0	0	0	0	0	0	0	0	0	1
GCA_001231805.1	ARI4	95.745	0	0	0	0	0	0	0	0	0	0	0	0	0	0	0	0	0	0	0
GCA_001231865.1	HO 7258 0475 05	95.745	0	0	0	0	0	0	0	0	0	0	0	0	0	0	0	0	0	0	0
GCA_001231945.1	08-01530	96.216	0	0	0	0	0	0	0	0	0	0	0	0	0	0	0	0	0	0	0
GCA_001232185.1	07-02997	95.745	0	0	0	0	0	99.048	0	0	0	0	0	0	0	0	0	0	0	0	1
GCA_001232345.1	09-01244	95.745	0	0	0	0	0	0	0	0	0	0	0	0	0	0	0	0	0	0	0
GCA_001232445.1	07-00058	95.745	0	0	0	0	0	99.048	0	0	0	0	0	0	0	0	0	0	0	0	1
GCA_001232785.1	08-01482	99.9	0	0	0	0	0	99.048	0	0	0	0	0	0	0	0	0	0	0	0	1
GCA_001232805.1	08-01488	95.745	0	0	0	0	0	99.048	0	0	0	0	0	0	0	0	0	0	0	0	1
GCA_001232845.1	HO 7374 0468 05	95.745	0	0	0	0	0	0	0	0	0	0	0	0	0	0	0	0	0	0	0
GCA_001232985.1	Btn 1626	95.745	0	0	0	0	0	99.048	0	0	0	0	0	0	0	0	0	0	0	0	1
GCA_001233125.1	07-03353	95.745	0	0	0	0	0	99.048	0	0	0	0	0	0	0	0	0	0	0	0	1
GCA_001233145.1	91/5368	95.745	0	0	0	0	0	0	0	0	0	0	0	0	0	0	0	0	0	0	0
GCA_001233345.1	07-01497	95.745	0	0	0	0	0	99.048	0	0	0	0	0	0	0	0	0	0	0	0	1
GCA_001233425.1	07-02986	95.745	0	0	0	0	0	99.048	0	0	0	0	0	0	0	0	0	0	0	0	1
GCA_001233485.1	99St18131	95.745	0	0	0	0	0	0	0	0	0	0	0	0	0	0	0	0	0	0	0
GCA_001233525.1	ARI1	95.745	0	0	0	0	0	99.048	0	0	0	0	0	0	0	0	0	0	0	0	1
GCA_001233605.1	ARI5	95.745	0	0	0	0	0	0	0	0	0	0	0	0	0	0	0	0	0	0	0
GCA_001233885.1	07-02987	95.745	0	0	0	0	0	99.048	0	0	0	0	0	0	0	0	0	0	0	0	1
GCA_001233945.1	06-01203	95.745	0	0	0	100	0	0	0	0	0	0	0	0	0	0	0	0	0	0	1
GCA_001234265.1	98-10618	95.745	0	0	0	0	0	0	0	0	0	0	0	0	0	0	0	0	0	0	0
GCA_001234365.1	09-01248	95.745	0	0	0	0	0	99.048	0	0	0	0	0	0	98.406	0	0	0	0	0	2
GCA_001234645.1	07-03345	95.745	0	0	0	0	0	99.048	0	0	0	0	0	0	0	0	0	0	0	0	1
GCA_001234705.1	07-02990	95.745	0	0	0	0	0	0	0	0	0	0	0	0	0	0	0	0	0	0	0
GCA_001234845.1	09-01249	95.745	0	0	0	0	0	0	0	0	0	0	0	0	0	0	0	0	0	0	0
GCA_001234905.1	06-01583	95.745	0	0	0	0	0	99.048	0	0	0	0	0	0	0	0	0	0	0	0	1
GCA_001234985.1	09-01246	95.745	0	0	0	0	0	99.048	0	0	0	0	0	0	98.406	0	0	0	0	0	2
GCA_001235025.1	HO 7230 0407 05	95.745	0	0	0	0	0	0	0	0	0	0	0	0	0	0	0	0	0	0	0
GCA_001235185.1	08-01667	95.745	0	0	0	0	0	99.048	0	0	0	0	0	0	0	0	0	0	0	0	1
GCA_001235225.1	07-02988	95.745	0	0	0	0	0	0	0	0	0	0	0	0	0	0	0	0	0	0	0
GCA_001235425.1	07-03135	97.991	0	0	0	0	0	0	0	0	0	0	0	0	0	0	0	0	0	0	0
GCA_001235525.1	08-01670	95.745	0	0	0	0	0	99.048	0	0	0	0	0	0	0	0	0	0	0	0	1
GCA_001235725.1	98-24344	95.745	0	0	0	0	0	99.048	0	0	0	0	0	0	0	0	0	0	0	0	1
GCA_001235785.1	07-02995	95.745	0	0	0	0	0	99.048	0	0	0	0	0	0	0	0	0	0	0	0	1
GCA_001235875.1	09-00983	99.9	0	0	0	0	0	99.048	0	0	0	0	0	0	0	0	0	0	0	0	1
GCA_001236005.1	A09973/ 97	95.745	0	0	0	0	0	99.048	0	0	0	0	0	0	0	0	0	0	0	0	1
GCA_001236185.1	06-01396	95.745	0	0	0	0	0	0	0	0	0	0	0	0	0	0	0	0	0	0	0
GCA_001236285.1	921.07	95.745	100	0	0	0	0	99.048	0	0	0	0	0	0	0	0	0	0	0	0	2
GCA_001236405.1	07-03341	99.9	0	0	0	0	0	0	0	0	0	0	0	0	0	0	0	0	0	0	0
GCA_001236465.1	04-00608	95.863	0	0	0	99.218	0	0	0	0	0	0	0	0	0	0	0	0	0	0	1
GCA_001236485.1	07-03349	95.745	0	0	0	0	0	99.048	0	0	0	0	0	0	0	0	0	0	0	0	1
GCA_001236565.1	ARI10	95.745	0	0	0	0	0	0	0	0	0	0	0	0	0	0	0	0	0	0	0
GCA_001236585.1	08-01489	95.745	0	0	0	0	0	0	0	0	0	0	0	0	0	0	0	0	0	0	0
GCA_001236825.1	08-01669	95.745	0	0	0	0	0	0	0	0	0	0	0	0	0	0	0	0	0	0	0
GCA_001236925.1	08-01674	99.9	0	0	0	0	0	98.912	0	0	0	0	0	0	0	0	0	0	0	0	1
GCA_001236985.1	07-02994	95.745	0	0	0	0	0	0	0	0	0	0	0	0	0	0	0	0	0	0	0
GCA_001237225.1	09-01243	99.9	0	0	0	0	0	99.048	0	0	0	0	0	0	0	0	0	0	0	0	1
GCA_001237245.1	03-01478	95.745	0	0	0	0	0	99.048	0	0	0	0	0	0	0	0	0	0	0	0	1
GCA_001237445.1	09-00985	0	0	0	0	0	0	0	0	0	0	0	0	0	0	0	0	0	0	0	0
GCA_001237625.1	07-03356	95.745	0	0	0	0	0	0	0	0	0	0	0	0	0	0	0	0	0	0	0
GCA_001237765.1	08-01304	95.745	0	0	0	0	0	99.048	0	0	0	0	0	0	0	0	0	0	0	0	1
GCA_001237825.1	07-00064	95.745	0	0	0	0	0	99.048	0	0	0	0	0	0	0	0	0	0	0	0	1
GCA_001237905.1	04-02314-1	95.918	0	0	0	100	0	0	0	0	0	0	0	0	0	0	0	0	0	0	1
GCA_001237945.1	06-01650	95.946	0	0	0	0	0	99.048	0	0	0	0	0	0	0	0	0	0	0	0	1
GCA_001238005.1	403.02	95.745	0	0	0	0	0	99.048	0	0	0	0	0	0	0	0	0	0	0	0	1
GCA_001238025.1	07-02996	95.745	0	0	0	0	0	99.048	0	0	0	0	0	0	0	0	0	0	0	0	1
GCA_001238145.1	04-03100	95.745	0	0	0	0	0	99.048	0	0	0	0	0	0	0	0	0	0	0	0	1
GCA_001239005.1	90/10685	95.745	0	0	0	0	0	0	0	0	0	0	0	0	0	0	0	0	0	0	0
GCA_001239145.1	M665 56	95.745	0	0	0	0	0	99.048	0	0	0	0	0	0	0	0	0	0	0	0	1
GCA_001239165.1	07-00309	95.745	0	0	0	0	0	99.048	0	0	0	0	0	0	0	0	0	0	0	0	1
GCA_001239405.1	370.07	95.745	0	0	0	0	0	0	0	0	0	0	0	0	0	0	0	0	0	0	0
GCA_001239525.1	07-00060	95.745	0	0	0	0	0	99.048	0	0	0	0	0	0	0	0	0	0	0	0	1
GCA_001239545.1	07-00059	95.745	0	0	0	0	0	99.048	0	0	0	0	0	0	0	0	0	0	0	0	1
GCA_001748105.1	M37	95.863	99.869	0	0	0	0	0	0	0	0	0	0	0	0	0	0	0	0	0	1
GCA_001748125.1	Pune08	95.863	99.869	0	0	0	0	99.126	0	0	0	0	0	0	0	0	0	0	0	0	2
GCA_002097305.1	V13/2/426	95.745	0	0	0	0	0	0	0	0	0	0	0	0	0	0	0	0	0	0	0
GCA_002097385.1	Q13/1/141	95.745	0	0	0	0	0	0	0	0	0	0	0	0	0	0	0	0	0	0	0
GCA_002097645.1	N13/1/715	95.745	0	0	0	0	0	99.048	0	0	0	0	0	0	0	0	0	0	0	0	1
GCA_002097655.1	Q13/1/145	95.745	0	0	0	0	0	0	0	0	0	0	0	0	0	0	0	0	0	0	0
GCA_002097695.1	N13/1/17	95.745	0	0	0	0	0	0	0	0	0	0	0	0	0	0	0	0	0	0	0
GCA_002843725.1	MR48	96.433	0	0	0	0	0	99.048	0	0	0	0	0	0	0	0	0	0	0	0	1
GCA_002843735.1	MR56	99.851	0	0	0	0	0	99.048	0	0	0	0	0	0	0	0	0	0	0	0	1
GCA_002843765.1	MR12	95.863	100	0	0	0	0	0	0	0	0	0	0	0	0	0	0	0	0	0	1
GCA_002843775.1	MR15	99.95	100	0	0	0	0	0	0	0	0	0	0	0	0	0	0	0	0	0	1
GCA_002843805.1	MR10	99.95	100	0	0	0	0	99.048	0	0	0	0	0	0	0	0	0	0	0	0	2
GCA_002843825.1	MR9	99.95	0	0	0	0	0	99.048	0	0	0	0	0	0	0	0	0	0	0	0	1
GCA_002843855.1	MR6	99.95	0	0	0	0	0	99.048	0	0	0	0	0	0	0	0	0	0	0	0	1
GCA_003383665.1	ST59-2	95.745	0	0	0	0	0	0	0	0	0	0	0	0	0	0	0	0	0	0	0
GCA_003383725.1	ST59-1	95.745	0	0	0	0	0	0	0	0	0	0	0	0	0	0	0	0	0	0	0
GCA_900017555.1	st995	95.745	0	0	0	0	0	99.048	0	0	0	0	0	0	0	0	0	0	0	0	1
GCA_900017625.1	st2494	95.745	0	0	0	0	0	99.048	0	0	0	0	0	0	0	0	0	0	0	0	1
GCA_900018245.1	st1320	95.745	0	0	0	0	0	99.048	0	0	0	0	0	0	0	0	0	0	0	0	1
GCA_900020205.1	st2307	95.745	0	0	0	0	0	99.048	0	0	0	0	0	0	0	0	0	0	0	0	1
GCA_900020345.1	st935	95.745	0	0	0	0	0	99.048	0	0	0	0	0	0	0	0	0	0	0	0	1
GCA_900020395.1	st1221	95.745	0	0	0	0	0	99.048	0	0	0	0	0	0	0	0	0	0	0	0	1
GCA_900025005.1	st269	95.745	0	0	0	0	0	99.048	0	0	0	0	0	0	0	0	0	0	0	0	1
GCA_900035705.1	st193	95.745	0	0	0	0	0	99.048	0	0	0	0	0	0	0	0	0	0	0	0	1
GCA_900037805.1	st966	95.745	0	0	0	0	0	99.048	0	0	0	0	0	0	0	0	0	0	0	0	1
GCA_900037925.1	st1165	95.745	0	0	0	0	0	0	0	0	0	0	0	0	0	0	0	0	0	0	0
GCA_900038775.1	st528	95.745	0	0	0	0	0	99.048	0	0	0	0	0	0	0	0	0	0	0	0	1
GCA_900038905.1	st877	95.745	0	0	0	0	0	99.048	0	0	0	0	0	0	0	0	0	0	0	0	1
GCA_900039735.1	st1257	95.745	0	0	0	0	0	99.048	0	0	0	0	0	0	0	0	0	0	0	0	1
GCA_900040155.1	st1291	95.745	0	0	0	0	0	99.048	0	0	0	0	0	0	0	0	0	0	0	0	1
GCA_900040245.1	st1387	95.745	0	0	0	0	0	99.048	0	0	0	0	0	0	0	0	0	0	0	0	1
GCA_900040455.1	st1663	95.745	0	0	0	0	0	99.048	0	0	0	0	0	0	0	0	0	0	0	0	1
GCA_900040995.1	st1432	95.745	0	0	0	0	0	99.048	0	0	0	0	0	0	0	0	0	0	0	0	1
GCA_900043565.1	st2827	95.745	0	0	0	0	0	0	0	0	0	0	0	0	0	0	0	0	0	0	0
GCA_900043915.1	st67	95.745	0	0	0	0	0	99.048	0	0	0	0	0	0	0	0	0	0	0	0	1
GCA_900044775.1	st1725	95.745	0	0	0	0	0	0	0	0	0	0	0	0	0	0	0	0	0	0	0
GCA_900045085.1	st1670	95.745	0	0	0	0	0	99.048	0	0	0	0	0	0	0	0	0	0	0	0	1
GCA_900045145.1	st1589	95.745	0	0	0	0	0	99.048	0	0	0	0	0	0	0	0	0	0	0	0	1
GCA_900045275.1	st2640	95.745	0	0	0	0	0	0	0	0	0	0	0	0	0	0	0	0	0	0	0
GCA_900045505.1	st69	95.745	0	0	0	0	0	99.048	0	0	0	0	0	0	0	0	0	0	0	0	1
GCA_900045825.1	st516	95.745	0	0	0	0	0	99.048	0	0	0	0	0	0	0	0	0	0	0	0	1
GCA_900046195.1	st1825	95.745	0	0	0	0	0	99.048	0	0	0	0	0	0	0	0	0	0	0	0	1
GCA_900046415.1	st2190	95.745	0	0	0	0	0	99.048	0	0	0	0	0	0	0	0	0	0	0	0	1
GCA_900046875.1	st1008	95.745	0	0	0	0	0	0	0	0	0	0	0	0	0	0	0	0	0	0	0
GCA_900048365.1	st2471	95.745	0	0	0	0	0	99.048	0	0	0	0	0	0	0	0	0	0	0	0	1
GCA_900048455.1	st333	95.745	0	0	0	0	0	99.048	0	0	0	0	0	0	0	0	0	0	0	0	1
GCA_900048655.1	st904	95.745	0	0	0	0	0	0	0	0	0	0	0	0	0	0	0	0	0	0	0
GCA_900048685.1	st925	95.745	100	0	0	0	0	99.048	0	0	0	0	0	0	0	0	0	0	0	0	2
GCA_900048735.1	st952	95.745	0	0	0	0	0	99.048	0	0	0	0	0	0	0	0	0	0	0	0	1
GCA_900048975.1	st2956	95.745	0	0	0	0	0	0	0	0	0	0	0	0	0	0	0	0	0	0	0
GCA_900050255.1	st3068	95.745	0	0	0	0	0	0	0	0	0	0	0	0	0	0	0	0	0	0	0
GCA_900050585.1	st3004	95.745	0	0	0	0	0	99.048	0	0	0	0	0	0	0	0	0	0	0	0	1
GCA_900051055.1	st2886	95.626	0	0	0	0	0	0	0	0	0	0	0	0	0	0	0	0	0	0	0
GCA_900052955.1	st2823	95.745	0	0	0	0	0	99.048	0	0	0	0	0	0	0	0	0	0	0	0	1
GCA_900055295.1	st2135	95.745	0	0	0	0	0	0	0	0	0	0	0	0	0	0	0	0	0	0	0
GCA_900056275.1	st3265	95.745	0	0	0	0	0	0	0	0	0	0	0	0	0	0	0	0	0	0	0
GCA_900056295.1	st1800	95.745	0	0	0	0	0	99.048	0	0	0	0	0	0	0	0	0	0	0	0	1
GCA_900056685.1	st2756	95.745	0	0	0	0	0	99.048	0	0	0	0	0	0	0	0	0	0	0	0	1
GCA_900058385.1	st2881	95.745	0	0	0	0	0	99.048	0	0	0	0	0	0	0	0	0	0	0	0	1
GCA_900058875.1	st1531	95.745	0	0	0	0	0	0	0	0	0	0	0	0	0	0	0	0	0	0	0
GCA_900060045.1	st2874	95.745	0	0	0	0	0	0	0	0	0	0	0	0	0	0	0	0	0	0	0
GCA_900061105.1	st2456	95.745	0	0	0	0	0	0	0	0	0	0	0	0	0	0	0	0	0	0	0
GCA_900062805.1	st1988	95.745	0	0	0	0	0	99.048	0	0	0	0	0	0	0	0	0	0	0	0	1
GCA_900063335.1	st933	95.745	0	0	0	0	0	99.048	0	0	0	0	0	0	0	0	0	0	0	0	1
GCA_900064435.1	st2206	95.745	0	0	0	0	0	0	0	0	0	0	0	0	0	0	0	0	0	0	0
GCA_900070265.1	1943STDY5698364	95.745	0	0	0	0	0	0	0	0	0	0	0	0	0	0	0	0	0	0	0
GCA_900082065.1	MSSA	95.863	100	0	0	0	0	0	0	0	0	0	0	0	0	0	0	0	0	0	1
GCA_900250295.1	H1311	95.863	99.869	0	0	0	0	99.048	0	0	0	0	0	0	0	0	0	0	0	0	2
GCA_900250405.1	H1477	95.745	0	0	0	0	0	0	0	0	0	0	0	0	0	0	0	0	0	0	0
GCA_900250435.1	H1441	95.745	0	0	0	0	0	0	0	0	0	0	0	0	0	0	0	0	0	0	0
GCA_900250535.1	H1535	95.863	0	0	0	0	0	99.048	0	0	0	0	0	0	0	0	0	0	0	0	1
GCA_900250565.1	H1640	95.313	0	0	0	0	0	99.794	0	0	0	0	0	0	0	0	0	0	0	0	1
GCA_900250605.1	H1629	95.745	0	0	0	0	0	0	0	0	0	0	0	0	0	0	0	0	0	0	0
GCA_900250645.1	H1678	95.863	0	0	0	0	0	0	0	0	0	0	0	0	0	0	0	0	0	0	0
GCA_900250835.1	HL461	95.745	0	0	0	0	0	0	0	0	0	0	0	0	0	0	0	0	0	0	0
GCA_900250995.1	M2906	95.863	99.869	0	0	0	0	0	0	0	0	0	0	0	0	0	0	0	0	0	1
GCA_900251155.1	M3074	95.745	0	0	0	0	0	99.048	0	0	0	0	0	0	0	0	0	0	0	0	1
GCA_900251175.1	M3089	97.991	0	0	0	0	0	0	0	0	0	0	0	0	0	0	0	0	0	0	0
GCA_900251225.1	M3168	95.745	0	0	0	0	0	0	0	0	0	0	0	0	0	0	0	0	0	0	0
GCA_900251305.1	M3250	95.745	0	0	0	0	0	0	0	0	0	0	0	0	0	0	0	0	0	0	0
GCA_900251425.1	M3499	95.745	0	0	0	0	0	0	0	0	0	0	0	0	0	0	0	0	0	0	0
GCA_900251455.1	M3483	95.745	100	0	0	0	0	0	0	0	0	0	0	0	0	0	0	0	0	0	1
GCA_900251565.1	M3684	95.745	0	0	0	0	0	0	0	0	0	0	0	0	0	0	0	0	0	0	0
GCA_900251645.1	M3599	95.745	0	0	0	0	0	0	0	0	0	0	0	0	0	0	0	0	0	0	0
GCA_900251675.1	M3591	95.863	0	0	0	0	0	0	0	0	0	0	0	0	0	0	0	0	0	0	0
GCA_900251685.1	M3732	99.9	0	0	0	0	0	0	0	0	0	0	0	0	0	0	0	0	0	0	0
GCA_900251985.1	M4004	95.745	0	0	0	0	0	0	0	0	0	0	0	0	0	0	0	0	0	0	0
GCA_900252045.1	M4001	95.863	0	0	0	0	0	0	0	0	0	0	0	0	0	0	0	0	0	0	0
GCA_900252055.1	M3966	95.745	0	0	0	0	0	0	0	0	0	0	0	0	0	0	0	0	0	0	0
GCA_900252065.1	M4005	95.745	0	0	0	0	0	0	0	0	0	0	0	0	0	0	0	0	0	0	0
GCA_900252095.1	RH193	95.863	0	0	0	0	0	0	0	0	0	0	0	0	0	0	0	0	0	0	0
GCA_900252125.1	RH167	95.971	0	0	0	0	0	0	0	0	0	0	0	0	0	0	0	0	0	0	0
GCA_900482765.1	EOE039	95.745	0	0	0	0	0	99.048	0	0	0	0	0	0	0	0	0	0	0	0	1
GCA_900482935.1	EOE149	95.745	0	0	0	0	0	0	0	0	0	0	0	0	0	0	0	0	0	0	0
GCA_900482995.1	EOE153	95.745	0	0	0	0	0	99.048	0	0	0	0	0	0	0	0	0	0	0	0	1
GCA_900483395.1	EOE193	95.745	0	0	0	0	0	99.048	0	0	0	0	0	0	0	0	0	0	0	0	1
GCA_900483555.1	EOE217	95.745	0	0	0	0	0	99.048	0	0	0	0	0	0	0	0	0	0	0	0	1
GCA_900483875.1	EOE265	95.745	0	0	0	0	0	99.048	0	0	0	0	0	0	0	0	0	0	0	0	1
GCA_900484405.1	EOE206	95.745	0	0	0	0	0	99.048	0	0	0	0	0	0	0	0	0	0	0	0	1
GCA_900490335.1	EOE148	95.745	0	0	0	0	0	99.048	0	0	0	0	0	0	0	0	0	0	0	0	1
GCA_000934185.1	71A_S11	95.863	0	0	0	0	0	0	0	0	0	0	0	0	0	0	0	0	0	0	0
GCA_000512525.1	MUM270	95.524	99.869	0	0	0	0	0	0	0	0	0	0	0	0	0	0	0	0	0	1
GCA_000572225.1	AMRF1	95.863	99.869	0	0	0	0	99.048	0	0	0	0	0	0	0	0	0	0	0	0	2
GCA_000831795.1	PB3-29	95.745	0	0	0	0	0	0	0	0	0	0	0	0	0	0	0	0	0	0	0
GCA_000831945.1	RB5	99.9	0	0	0	100	0	0	0	0	0	0	0	0	0	0	0	0	0	0	1
GCA_001202295.1	BSAR866	0	0	0	0	0	0	99.048	0	0	0	0	0	0	0	0	0	0	0	0	1
GCA_001208785.1	BSAR863	95.745	0	0	0	0	0	0	0	0	0	0	0	0	0	0	0	0	0	0	0
GCA_002849265.1	17	95.863	0	0	0	0	0	0	0	0	0	0	0	0	0	0	0	0	0	0	0

[truncated: 2 more sheets: CC5, CC398]
