# Supplementary material for: Anti-Restriction Gene Homologs Are Highly Represented in Methicillin-Resistant and Multidrug-Resistant Staphylococcus aureus ST239 and ST398: Implications for Resistance Gene Acquisitions
Source: Antibiotics (Basel). 2022 Sep 8;11(9):1217. doi: 10.3390/antibiotics11091217 (PMC9495042; doi:10.3390/antibiotics11091217)
Supplement: Supplementary file 1 [file antibiotics-11-01217-s001.zip › Supplementary file S4.xlsx]

## Sheet: Tab 1
Supplementary File S4. GenBank access number of the genome sequences used to construct the phylogenetic tree of the transposons Tn5801 (Tab 1) and Tn916 (Tab 2).
	cov	id	access
Staphylococcus aureus subsp. aureus strain Gv88, complete genome	1	0.9999	CP012018.1
Staphylococcus aureus subsp. aureus strain HC1340, complete genome	1	0.9999	CP012011.1
Staphylococcus aureus subsp. aureus strain Gv69, complete genome	1	0.9999	CP009681.1
Staphylococcus aureus subsp. aureus strain Gv51, complete genome	1	0.9999	CP012015.1
Staphylococcus aureus strain NCTC9944 genome assembly, chromosome: 1	1	0.9998	LS483309.1
Staphylococcus aureus strain M92 chromosome, complete genome	1	0.9998	CP015447.2
Staphylococcus aureus subsp. aureus strain Be62, complete genome	1	0.9998	CP012013.1
Staphylococcus aureus strain BPH2056 genome assembly, chromosome: 1	1	0.9998	LR027874.1
Staphylococcus aureus strain NCTC11940 genome assembly, chromosome: 1	1	0.9998	LS483350.1
Staphylococcus aureus strain JKD6004-DR chromosome, complete genome	1	0.9997	CP040625.1
Staphylococcus aureus strain JKD6004 chromosome, complete genome	1	0.9997	CP040622.1
Staphylococcus aureus strain BPH2019 genome assembly, chromosome: 1	1	0.9997	LR027870.1
Staphylococcus aureus isolate BPH2869 genome assembly, chromosome: 1	1	0.9997	LR027869.1
Staphylococcus aureus strain WCH-SK2 chromosome, complete genome	1	0.9997	CP031537.1
Staphylococcus aureus strain CMRSA-3 chromosome, complete genome	1	0.9997	CP029685.1
Staphylococcus aureus isolate BPH3244 genome assembly, chromosome: 1	1	0.9997	LR027877.1
Staphylococcus aureus strain JKD6009 genome assembly, chromosome: 1	1	0.9997	LR027876.1
Staphylococcus aureus subsp. aureus str. JKD6008, complete genome	1	0.9997	CP002120.1
Staphylococcus aureus subsp. aureus T0131, complete genome	1	0.9996	CP002643.1
Staphylococcus aureus strain BPH2070 genome assembly, chromosome: 1	1	0.9996	LR027873.1
Staphylococcus aureus strain NMR08 chromosome	1	0.9996	CP023560.1
Staphylococcus aureus subsp. aureus strain HC1335, complete genome	1	0.9994	CP012012.1
Staphylococcus aureus strain BPH2003 genome assembly, chromosome: 1	1	0.9998	LR027878.1
Staphylococcus aureus strain M48 chromosome, complete genome	1	0.9998	CP030138.1
Staphylococcus aureus strain CMRSA-6 chromosome, complete genome	0.99	0.9998	CP027788.1
Staphylococcus aureus strain V605, complete genome	1	0.9998	CP013959.1
Staphylococcus aureus strain V521, complete genome	1	0.9998	CP013957.1
Staphylococcus aureus subsp. aureus TW20, complete genome	1	0.9998	FN433596.1
Staphylococcus aureus strain MRSA107 chromosome, complete genome	1	0.9997	CP018629.1
Staphylococcus aureus subsp. aureus Z172, complete genome	1	0.9997	CP006838.1
Staphylococcus aureus strain BPH2947 genome assembly, chromosome: 1	1	0.9996	LR130515.1
Staphylococcus aureus strain XN108, complete genome	1	0.9995	CP007447.1
Enterococcus avium strain FDAARGOS_184 chromosome, complete genome	0.91	0.9993	CP024590.1
Staphylococcus aureus TUM9463 DNA, complete genome	0.91	0.9993	AP019306.1
Staphylococcus aureus TUM9458 DNA, complete genome	0.91	0.9993	AP019305.1
Staphylococcus aureus strain NF25 chromosome, complete genome	0.91	0.9993	CP035415.1
Staphylococcus aureus strain FORC_062 chromosome, complete genome	0.91	0.9993	CP022582.1
Staphylococcus aureus strain FORC_027, complete genome	0.91	0.9993	CP012692.1
Staphylococcus aureus strain NCCP14558, complete genome	0.91	0.9993	CP013953.1
Staphylococcus aureus strain aureus chromosome, complete genome	0.91	0.9993	CP029198.1
Enterococcus faecium strain ISMMS_VRE_11, complete genome	0.91	0.9993	CP016163.1
Staphylococcus pseudintermedius ED99, complete genome	0.91	0.9993	CP002478.1
Staphylococcus aureus strain AR_0219 chromosome, complete genome	0.91	0.9993	CP029675.1
Staphylococcus aureus strain FDAARGOS_40 chromosome, complete genome	0.91	0.9993	CP026958.1
Staphylococcus aureus strain NRS1 chromosome, complete genome	0.91	0.9993	CP026069.1
Staphylococcus aureus strain NCCP14562, complete genome	0.91	0.9993	CP013955.1
Staphylococcus aureus subsp. aureus Mu3 DNA, complete genome	0.91	0.9993	AP009324.1
Staphylococcus aureus subsp. aureus Mu50 DNA, complete genome	0.91	0.9993	BA000017.4
Streptococcus pyogenes strain emmSTG866.1 chromosome, complete genome	0.91	0.9992	CP035428.1
Staphylococcus aureus strain SVH7513 chromosome, complete genome	0.91	0.9991	CP029166.1
Staphylococcus aureus strain NRS120 chromosome, complete genome	0.91	0.999	CP026072.1
Staphylococcus aureus strain 2395 USA500, complete genome	0.91	0.999	CP007499.1
Enterococcus faecalis strain CVM N60443F chromosome, complete genome	0.91	0.999	CP028724.1
Enterococcus faecium strain 13-009 chromosome	0.95	0.9991	CP025389.1
Enterococcus faecium isolate E6988 genome assembly, chromosome: 1	0.91	0.9995	LR135243.1
Enterococcus faecium strain UAMSEF_01 chromosome, complete genome	0.91	0.9993	CP035648.1
Enterococcus faecium strain UAMSEF_08 chromosome, complete genome	0.91	0.9993	CP035654.1
Enterococcus faecium strain UAMSEF_09 chromosome, complete genome	0.91	0.9993	CP035660.1
Enterococcus faecium strain UAMSEF_20 chromosome, complete genome	0.91	0.9993	CP035666.1
Enterococcus faecium strain AUSMDU00004167 chromosome, complete genome	0.91	0.9993	CP027497.1
Enterococcus faecium Aus0004, complete genome	0.91	0.9993	CP003351.1
Enterococcus faecium isolate Ef_DMG1500501 genome assembly, chromosome: 1	0.91	0.999	LT603678.1

## Sheet: Tab 2
Supplementary File S4. GenBank access number of the genome sequences used to construct the phylogenetic tree of the transposons Tn5801 (Tab 1) and Tn916 (Tab 2).
	Query Cover	Per. Ident	Accession
Staphylococcus aureus strain B6-55A chromosome, complete genome	1	0.9998	CP042110.1
Staphylococcus aureus strain B3-14B chromosome, complete genome	1	0.9998	CP042003.1
Streptococcus agalactiae strain PLGBS13 chromosome, complete genome	1	0.9998	CP029749.1
Enterococcus casseliflavus strain EC-369 chromosome, complete genome	1	0.9998	CP032739.1
Staphylococcus aureus isolate 20_LA_415 genome assembly, chromosome: I	1	0.9998	LT992475.1
Staphylococcus aureus isolate 19_LA_388 genome assembly, chromosome: I	1	0.9998	LT992474.1
Staphylococcus aureus isolate 13_LA_301 genome assembly, chromosome: I	1	0.9998	LT992470.1
Staphylococcus aureus isolate 3_LA_115 genome assembly, chromosome: I	1	0.9998	LT992464.1
Staphylococcus aureus isolate 2_LA_86 genome assembly, chromosome: I	1	0.9998	LT992463.1
Staphylococcus aureus isolate 8_LA_272 genome assembly, chromosome: I	1	0.9998	LT992461.1
Staphylococcus aureus isolate 9_LA_281 genome assembly, chromosome: I	1	0.9998	LT992460.1
Staphylococcus aureus isolate 7_4623 genome assembly, chromosome: I	1	0.9998	LT992458.1
Enterococcus faecalis KUB3007 DNA, complete genome	1	0.9998	AP018543.1
Enterococcus faecalis KUB3006 DNA, complete genome	1	0.9998	AP018538.1
Staphylococcus capitis DNA, complete genome, strain: TW2795	1	0.9998	AP014956.1
Streptococcus agalactiae strain NGBS357, complete genome	1	0.9998	CP012503.1
Streptococcus agalactiae strain FWL1402, complete genome	1	0.9998	CP016391.1
Streptococcus agalactiae strain CU_GBS_98, complete genome	1	0.9998	CP010875.1
Streptococcus agalactiae strain CU_GBS_08 chromosome, complete genome	1	0.9998	CP010874.1
Enterococcus durans strain VREdu chromosome	1	0.9998	CP042597.1
Staphylococcus aureus strain PCFH-226 chromosome, complete genome	1	0.9998	CP035005.1
Staphylococcus aureus strain PCFA-221 chromosome, complete genome	1	0.9998	CP035003.1
Staphylococcus aureus isolate 21_LA_436 genome assembly, chromosome: I	1	0.9998	LT992476.1
Staphylococcus aureus isolate 5_3949 genome assembly, chromosome: I	1	0.9998	LT992462.1
Streptococcus agalactiae strain SGEHI2015-113 chromosome, complete genome	1	0.9998	CP025026.1
Streptococcus agalactiae strain GBS ST-1, complete genome	1	0.9998	CP013202.1
Staphylococcus aureus isolate 17_LA_343 genome assembly, chromosome: I	1	0.9997	LT992471.1
Staphylococcus aureus isolate 15_LA_305 genome assembly, chromosome: I	1	0.9997	LT992469.1
Staphylococcus aureus isolate 4_LA_208 genome assembly, chromosome: I	1	0.9997	LT992466.1
Staphylococcus aureus isolate 1_1439 genome assembly, chromosome: I	1	0.9997	LT992456.1
Streptococcus agalactiae strain B507 chromosome, complete genome	1	0.9997	CP021771.1
Staphylococcus aureus strain CFSAN064038 chromosome, complete genome	1	0.9997	CP028163.1
Staphylococcus aureus subsp. aureus strain ISU926, complete genome	1	0.9997	CP017091.1
Streptococcus suis strain LSM102, complete genome	1	0.9997	CP016175.1
Staphylococcus aureus strain 08S00974, complete genome	1	0.9997	CP020019.1
Enterococcus faecalis strain CLB21560, complete genome	1	0.9997	CP019512.1
Staphylococcus aureus strain NZ15MR0322 genome assembly, chromosome: 1	1	0.9997	LT699704.1
Staphylococcus aureus subsp. aureus strain LA-MRSA ST398 isolate E154, complete genome	1	0.9997	CP013218.1
Staphylococcus aureus strain RIVM3897, complete genome	1	0.9997	CP013621.1
Staphylococcus aureus strain RIVM1607, complete genome	1	0.9997	CP013619.1
Staphylococcus aureus strain RIVM1295, complete genome	1	0.9997	CP013616.1
Streptococcus agalactiae strain SS1, complete genome	1	0.9997	CP010867.1
Streptococcus agalactiae 09mas018883 complete genome	1	0.9997	HF952104.1
Staphylococcus aureus subsp. aureus ST398 complete genome	1	0.9997	AM990992.1
Staphylococcus aureus isolate 14_5418 genome assembly, chromosome: I	1	0.9997	LT992473.1
Staphylococcus aureus isolate 10_5235 genome assembly, chromosome: I	1	0.9997	LT992472.1
Staphylococcus aureus isolate 6_LA_232 genome assembly, chromosome: I	1	0.9997	LT992465.1
Staphylococcus aureus isolate 22_LA_562 genome assembly, chromosome: I	1	0.9996	LT992477.1
Staphylococcus aureus isolate 12_LA_293 genome assembly, chromosome: I	1	0.9996	LT992468.1
Staphylococcus aureus isolate 16_LA_309 genome assembly, chromosome: I	1	0.9996	LT992467.1
Staphylococcus aureus 08BA02176, complete genome	1	0.9996	CP003808.1
Staphylococcus haemolyticus strain PK-01 chromosome, complete genome	1	0.9996	CP035541.1
Enterococcus faecalis strain CVM N48037F chromosome, complete genome	1	0.9996	CP028720.1
Streptococcus gallolyticus subsp. gallolyticus ATCC 43143 DNA, complete genome	1	0.9993	AP012053.1
Enterococcus faecium isolate E0139 genome assembly, chromosome: 1	1	0.9992	LR132067.1
Enterococcus faecium isolate E9101 genome assembly, chromosome: 1	1	0.9992	LR135474.1
Enterococcus faecium isolate E0595 genome assembly, chromosome: 1	1	0.9992	LR135179.1
Streptococcus suis BM407 complet genome, strain BM407	1	0.9992	FM252032.1
Staphylococcus pseudintermedius strain 49_44 chromosome	1	0.9992	CP035743.1
Clostridioides difficile strain DSM 29747 chromosome, complete genome	1	0.9992	CP019864.1
Clostridioides difficile strain R3 chromosome, complete genome	1	0.9992	CP026615.2
Clostridioides difficile strain R2 chromosome, complete genome	1	0.9992	CP026614.2
Clostridioides difficile strain R1 chromosome, complete genome	1	0.9992	CP026613.2
Clostridiaceae bacterium 14S0207 chromosome, complete genome	1	0.9992	CP026600.1
Bacillus subtilis transposon Tn916, complete sequence	1	0.9992	KM516885.1
Bacillus sp. BS34A genome assembly, chromosome: I	1	0.9992	LN680001.1
Bacillus subtilis genome assembly BS49Ch, chromosome : I	1	0.9992	LN649259.1
Staphylococcus aureus strain NCTC13140 genome assembly, chromosome: 1	1	0.9991	LS483319.1
Staphylococcus pseudintermedius strain 063228, complete genome	1	0.9991	CP015626.1
[Haemophilus] ducreyi strain 33921 chromosome	1	0.9991	CP011228.1
Streptococcus pyogenes strain NCTC12050 genome assembly, chromosome: 1	1	0.9991	LS483334.1
Streptococcus pyogenes strain NCTC13744 genome assembly, chromosome: 1	1	0.999	LS483407.1
Streptococcus anginosus strain J4211, complete genome	1	0.999	CP012805.1
Streptococcus anginosus C238, complete genome	1	0.999	CP003861.1
Enterococcus faecalis DS16 transposon Tn916, (tet(M)), (Xis-Tn), (Int-Tn) genes, ORFs 1-24, complete cds, complete sequence	1	0.999	U09422.1									0.9992	CP027771.1
Enterococcus faecalis strain 4928STDY7387888 genome assembly, chromosome: 1	0.99	0.9998	LR607376.1
Streptococcus pyogenes strain DMG1800716 chromosome, complete genome	0.99	0.9992	CP027771.1
Enterococcus faecium strain AUSMDU00004028 chromosome, complete genome	1	0.999	CP027512.1
Enterococcus faecium isolate Ef_aus00233 genome assembly, chromosome: 1	1	0.999	LT598663.1
Enterococcus avium strain 352 chromosome, complete genome	1	0.9998	CP034169.1
Enterococcus faecium C68 assembly_C68_1217 transposon Tn6084, complete sequence	1	0.9999	HM243622.1
Clostridioides difficile strain DSM 28666 chromosome, complete genome	0.99	0.999	CP012321.1
Enterococcus faecium strain FDAARGOS_323 plasmid unnamed, complete sequence	1	0.9991	CP027401.1
Staphylococcus aureus KG-22 DNA, complete genome	0.94	0.9999	AP019545.1
Staphylococcus aureus KG-18 DNA, complete genome	0.94	0.9999	AP019543.1
Staphylococcus aureus KG-03 DNA, complete genome	0.94	0.9999	AP019542.1
Listeria monocytogenes strain TTH-2007 transposon Tn6198, complete sequence	1	0.9998	JX120102.1
Streptococcus pneumoniae strain SPN XDR SMC1710-32 chromosome, complete genome	0.99	0.9994	CP025838.1
